# Supplementary material for: AKT Inhibition Promotes Nonautonomous Cancer Cell Survival
Source: Oxford University Press journal article supplement (doi:10.1158/1535-7163.mct-15-0414), 2015-12-31
Supplement: 15357163mct150414-sup-149992_2_supp_3173837_nvt1rz.xlsx [file 15357163mct150414-sup-149992_2_supp_3173837_nvt1rz.xlsx]

## Sheet: S1A.GRO-Seq
Gene_Symbol	Entre_Gene_ID	Log2_Fold_Change_HCT116	Log2_Fold_Change_MCF7	Log2_Fold_Change_Average
H2AFX	3014	2.75542	2.42687	2.59114
SAT1	6303	2.84514	2.19792	2.52153
IER3	8870	2.77858	2.20316	2.49087
S100A14	57402	2.30953	2.28603	2.29778
CAV2	858	2.86395	1.52226	2.19311
RPL17	6139	4.03393	0.205172	2.11955
TMEM107	84314	2.86032	1.19364	2.02698
ERRFI1	54206	2.45087	1.48799	1.96943
PDP1	54704	1.72672	2.11783	1.92227
ACTG1	71	2.23383	1.58961	1.91172
PCNA	5111	2.50099	1.29947	1.90023
ANKRD30BL	554226	2.04977	1.6591	1.85444
RRM2	6241	2.24423	1.42372	1.83397
PVR	5817	2.43444	1.19349	1.81396
HOXA9	3205	1.99414	1.33533	1.66474
MARCKS	4082	2.08862	1.24033	1.66447
HFM1	164045	1.99264	1.3193	1.65597
TRIB1	10221	2.47786	0.799561	1.63871
HMGA2	8091	1.39945	1.8765	1.63798
MTRNR2L2	100462981	1.57948	1.69262	1.63605
SCD	6319	2.07311	1.187	1.63006
ARHGAP29	9411	2.20349	1.04157	1.62253
SRSF1	6426	2.33128	0.908512	1.6199
HMGA1	3159	2.07042	1.1537	1.61206
GNB2L1	10399	2.29038	0.916455	1.60342
RPL13A	23521	2.04116	1.1534	1.59728
ATG12	9140	1.91119	1.19893	1.55506
PIGY	84992	2.75788	0.345146	1.55151
SRSF7	6432	2.30853	0.773054	1.54079
HLA-C	3107	1.77449	1.25181	1.51315
SLCO5A1	81796	1.71046	1.29929	1.50487
EIF4A2	1974	2.42275	0.560522	1.49163
RPL23A	6147	2.32592	0.616652	1.47129
F3	2152	1.69908	1.24275	1.47092
FAM32A	26017	2.06128	0.850955	1.45612
ATP6AP1L	92270	1.52266	1.34386	1.43326
SCNN1A	6337	1.98602	0.866909	1.42646
MTAP	4507	1.79895	1.04274	1.42084
SRSF6	6431	2.357	0.478302	1.41765
HSPD1	3329	2.36029	0.411255	1.38577
EREG	2069	0.985604	1.70987	1.34774
CDKN2A	1029	1.80158	0.891982	1.34678
HSPA5	3309	1.01264	1.67572	1.34418
KLF4	9314	1.82345	0.852447	1.33795
FAM3C	10447	1.29204	1.36334	1.32769
CCNA2	890	1.33884	1.30208	1.32046
CPOX	1371	0.99894	1.61875	1.30885
IMP3	55272	1.36795	1.24689	1.30742
ZBED6	100381270	1.33748	1.26982	1.30365
BCL2L1	598	1.76426	0.841667	1.30296
PURA	5813	1.64428	0.940271	1.29227
LGALS3BP	3959	1.33058	1.25151	1.29104
COX4I1	1327	1.37326	1.18776	1.28051
CDKN2B	1030	1.87828	0.682743	1.28051
KTI12	112970	1.1417	1.41462	1.27816
MAT2A	4144	1.29357	1.25733	1.27545
MCL1	4170	1.18229	1.36618	1.27424
DUSP6	1848	1.50162	1.04555	1.27359
PFDN6	10471	0.828275	1.71412	1.2712
TMSB10	9168	0.95699	1.58405	1.27052
TSTD1	100131187	1.85914	0.679176	1.26916
DCBLD2	131566	0.90482	1.6161	1.26046
FIGNL1	63979	1.28654	1.22677	1.25666
DDIT4	54541	1.30968	1.15179	1.23073
RPS21	6227	1.87523	0.584943	1.23009
MRPL51	51258	1.92183	0.531041	1.22644
RPL26	6154	1.58771	0.860939	1.22432
CDCP1	64866	1.50963	0.938478	1.22405
EIF5A	1984	1.74107	0.700839	1.22095
ID1	3397	0.995873	1.43652	1.21619
PHLDA1	22822	1.78489	0.637961	1.21143
GDF15	9518	1.52051	0.896705	1.20861
RPL4	6124	1.68794	0.724358	1.20615
EIF4G2	1982	1.61134	0.786912	1.19912
DNTTIP2	30836	1.6464	0.730331	1.18837
RANBP6	26953	1.61597	0.74858	1.18228
PRNP	5621	1.18418	1.17611	1.18015
CSTF2T	23283	1.34056	1.01146	1.17601
PEX12	5193	1.40305	0.944312	1.17368
FAM136A	84908	1.32327	1.01235	1.16781
DDX60L	91351	1.44655	0.863276	1.15491
HINT2	84681	1.78012	0.528715	1.15442
PIGW	284098	1.13988	1.16292	1.1514
SF1	7536	2.0542	0.231689	1.14294
RPS2	6187	1.31633	0.967612	1.14197
TMED7	51014	1.20428	1.07317	1.13872
H2AFZ	3015	1.50463	0.771991	1.13831
CFL1	1072	1.53778	0.729733	1.13375
MAGEF1	64110	0.945058	1.31681	1.13093
DDX39B	7919	1.495	0.751633	1.12332
YOD1	55432	1.29058	0.953341	1.12196
CSNK2A3	283106	1.24729	0.986942	1.11712
RPS7	6201	1.45171	0.776911	1.11431
GCDH	2639	1.23969	0.971272	1.10548
SLC25A28	81894	1.24546	0.963316	1.10439
OR51B5	282763	0.958574	1.24871	1.10364
EXTL2	2135	1.48062	0.720394	1.10051
C16orf52	730094	1.40934	0.783782	1.09656
SMIM15	643155	0.438776	1.74937	1.09407
RASAL1	8437	1.30644	0.880687	1.09356
EXOSC3	51010	1.99418	0.17919	1.08669
GOT1	2805	1.18823	0.982515	1.08537
TAS2R13	50838	1.36463	0.804274	1.08445
CCND1	595	1.44346	0.716592	1.08002
KLK8	11202	1.30416	0.851185	1.07767
OR51B2	79345	1.13935	1.00687	1.07311
PRSS3	5646	0.592358	1.5527	1.07253
IFIT5	24138	1.53067	0.61336	1.07202
AKAP12	9590	1.27448	0.869306	1.07189
WNT16	51384	1.44799	0.693716	1.07085
PMAIP1	5366	0.917937	1.21787	1.0679
AMH	268	1.21762	0.914715	1.06617
DHRS3	9249	1.93106	0.182476	1.05677
TAX1BP3	30851	0.877247	1.23466	1.05595
EID2B	126272	0.990761	1.11382	1.05229
SMNDC1	10285	1.47068	0.631867	1.05127
SMURF2	64750	1.28154	0.799523	1.04053
GPX8	493869	1.11281	0.96618	1.03949
NOP56	10528	1.63126	0.439701	1.03548
FABP5	2171	1.40164	0.662631	1.03213
TAF1D	79101	0.809505	1.24907	1.02929
ZIC2	7546	1.11474	0.938697	1.02672
SNRPG	6637	1.63798	0.413867	1.02592
MBD1	4152	1.25606	0.786056	1.02106
CD46	4179	0.862842	1.17786	1.02035
RPL22L1	200916	1.5101	0.525554	1.01783
SLC39A7	7922	1.24118	0.791252	1.01622
RPL6	6128	1.23498	0.781232	1.0081
TCF7L2	6934	1.22738	0.763844	0.995614
TPT1	7178	1.25905	0.724789	0.991921
ADIRF	10974	1.01994	0.949839	0.984891
RPS6	6194	1.11995	0.841213	0.980584
SMAD3	4088	1.35294	0.602731	0.977835
BBS10	79738	1.25688	0.695596	0.976238
RPL3	6122	1.15808	0.793954	0.976018
VPS29	51699	1.27712	0.672523	0.974823
PCBP1	5093	1.12917	0.818539	0.973853
RPL35A	6165	1.09629	0.847425	0.971857
RBM12	10137	1.05261	0.88099	0.9668
RPL38	6169	1.417	0.512799	0.964898
ANKRD10	55608	0.883735	1.04543	0.964584
HOXB6	3216	1.43229	0.49503	0.963661
RPL27A	6157	1.47484	0.451435	0.963138
ZNF207	7756	0.877922	1.04115	0.959534
CAPN2	824	1.46453	0.445788	0.955159
PDE3A	5139	1.06063	0.848305	0.954468
AP3M2	10947	1.1441	0.764718	0.95441
ITGB1	3688	1.07873	0.826355	0.95254
TXNL4A	10907	1.36067	0.543508	0.95209
PYGL	5836	1.18536	0.717673	0.951515
CCNL2	81669	1.7317	0.158186	0.944946
PPAT	5471	0.916235	0.969981	0.943108
ASPH	444	0.884119	0.98845	0.936285
YAE1D1	57002	1.48192	0.385197	0.933561
MOCS2	4338	1.08328	0.77052	0.926898
GADD45A	1647	0.903674	0.947678	0.925676
UTP15	84135	0.899441	0.951184	0.925313
COX7A2	1347	1.32275	0.526721	0.924738
C1GALT1	56913	1.06541	0.78043	0.922921
ADPRHL2	54936	0.847921	0.992294	0.920108
CYB5B	80777	1.07965	0.753941	0.916796
HNRNPH3	3189	1.49535	0.337323	0.916336
CRYGS	1427	0.89652	0.933754	0.915137
TIMM8A	1678	0.684857	1.14481	0.914833
BUB3	9184	0.686516	1.12522	0.905867
FUS	2521	1.51034	0.298923	0.904632
MPLKIP	136647	1.06089	0.747571	0.904229
PRRC2A	7916	1.26155	0.539198	0.900373
GSDMB	55876	1.39466	0.402489	0.898574
RPLP2	6181	0.991691	0.797819	0.894755
EMP1	2012	1.3105	0.474808	0.892654
KIAA0100	9703	1.4366	0.342354	0.889478
RPL21	6144	1.11133	0.661625	0.88648
C11orf57	55216	1.11424	0.655594	0.884915
FAM122A	116224	1.12365	0.644978	0.884315
SLC20A1	6574	0.833081	0.935133	0.884107
GTPBP2	54676	1.02746	0.738521	0.882991
ZNF121	7675	0.942711	0.814041	0.878376
SRRM2	23524	1.14165	0.609668	0.875661
CLIP4	79745	0.93503	0.816225	0.875627
TAF7	6879	0.803844	0.94412	0.873982
VPS37B	79720	1.29451	0.452672	0.873588
TRNP1	388610	0.975019	0.770105	0.872562
HS3ST1	9957	0.429475	1.31437	0.871923
OXLD1	339229	1.20613	0.535761	0.870948
TAPBP	6892	0.715277	1.02656	0.870916
RRP8	23378	1.20797	0.533361	0.870664
MET	4233	1.19739	0.541209	0.869301
PTPN18	26469	1.14896	0.587713	0.868335
NTSR1	4923	0.867333	0.867983	0.867658
TRIM25	7706	0.904386	0.827062	0.865724
IARS	3376	1.27546	0.455734	0.865598
EZR	7430	0.204145	1.52135	0.862749
MRPL24	79590	0.87308	0.84448	0.85878
MATR3	9782	1.09718	0.619713	0.858446
S100A6	6277	1.04175	0.671635	0.856692
KIAA0020	9933	0.949638	0.762349	0.855993
TSPAN5	10098	1.50173	0.20129	0.851509
TOP1	7150	1.14464	0.545516	0.845078
NDNL2	56160	0.811954	0.877799	0.844876
SHARPIN	81858	0.603958	1.08557	0.844763
RPS27A	6233	1.15558	0.533533	0.844558
CNTF	1270	0.816405	0.869575	0.84299
FRMD5	84978	0.958462	0.724682	0.841572
RBM12B	389677	0.93636	0.746148	0.841254
RCN1	5954	1.4298	0.247745	0.838775
ACSS2	55902	0.811646	0.865706	0.838676
POLR2H	5437	0.792254	0.882861	0.837557
AK2	204	1.17245	0.49894	0.835695
TUFM	7284	0.881514	0.787793	0.834654
RPS13	6207	0.448059	1.22085	0.834455
CKLF	51192	1.00985	0.658133	0.833993
ZNF621	285268	0.921159	0.741697	0.831428
RBCK1	10616	1.19021	0.471	0.830603
TM2D3	80213	1.55791	0.102029	0.829968
CALM2	805	0.931424	0.723104	0.827264
FEM1C	56929	1.07668	0.570538	0.823612
SEPT10	151011	0.801968	0.843622	0.822795
PPIA	5478	1.14552	0.499779	0.82265
CCT2	10576	1.00464	0.63273	0.818687
EMG1	10436	1.02302	0.601134	0.812075
ANXA2	302	1.16073	0.462861	0.811796
TAF15	8148	0.805764	0.815189	0.810477
ABHD10	55347	0.778354	0.835824	0.807089
CAPRIN2	65981	0.634216	0.975413	0.804815
CDK1	983	0.610009	0.996262	0.803136
DUSP5	1847	0.934578	0.670231	0.802404
RRS1	23212	0.700316	0.896075	0.798196
ATAD2	29028	0.869396	0.70711	0.788253
ANXA3	306	0.87193	0.703289	0.787609
PYGO2	90780	0.923594	0.650831	0.787212
TIFA	92610	0.993681	0.577468	0.785574
RPL12	6136	1.04482	0.520732	0.782775
FAM122B	159090	1.17251	0.392838	0.782673
RPS29	6235	0.953264	0.607404	0.780334
NUP85	79902	0.906979	0.651298	0.779138
HYOU1	10525	0.966673	0.591592	0.779132
STK39	27347	0.868534	0.686785	0.77766
TOR1B	27348	1.13734	0.417162	0.777252
HEXIM1	10614	0.813399	0.740568	0.776984
HLA-E	3133	1.0802	0.472689	0.776444
IGF2BP2	10644	0.843332	0.706918	0.775125
NAB1	4664	0.797916	0.751632	0.774774
DNMBP	23268	0.987533	0.559152	0.773343
PDCD2	5134	0.967517	0.570461	0.768989
TRIM38	10475	1.19696	0.338581	0.767771
NCBP2	22916	1.06213	0.465267	0.7637
TNFRSF10D	8793	0.861507	0.662842	0.762174
DSN1	79980	1.16536	0.351507	0.758432
RPL5	6125	1.14919	0.365273	0.75723
PSAT1	29968	0.529732	0.983162	0.756447
HMGB2	3148	1.48118	0.0314873	0.756336
CENPV	201161	1.07892	0.432993	0.755958
CDCA7L	55536	0.997584	0.511264	0.754424
VAMP3	9341	0.887186	0.620909	0.754048
ZNF518A	9849	0.616965	0.890736	0.75385
GUCA1B	2979	0.999925	0.507283	0.753604
DDIT3	1649	1.42305	0.0835335	0.753294
SDF2L1	23753	0.769607	0.735093	0.75235
RPL7A	6130	1.33151	0.168943	0.750225
ERP29	10961	0.868141	0.620283	0.744212
MTERF	7978	1.12591	0.360355	0.743132
GPRC5A	9052	1.16027	0.325319	0.742792
WDR5B	54554	0.825563	0.659461	0.742512
CMTM7	112616	0.809383	0.672039	0.740711
CYTH2	9266	0.927711	0.553408	0.74056
HOXB7	3217	0.824672	0.655721	0.740197
EPN3	55040	0.913579	0.564487	0.739033
TMED4	222068	0.744453	0.733231	0.738842
NPM1	4869	0.97508	0.49799	0.736535
UBE2N	7334	1.15103	0.318694	0.73486
FSBP	100861412	0.793235	0.67361	0.733423
GART	2618	0.92671	0.539753	0.733232
CHML	1122	0.264446	1.19812	0.731285
NCL	4691	0.950391	0.507033	0.728712
EXOSC2	23404	1.12556	0.331472	0.728514
RPL13	6137	1.05955	0.396389	0.727968
PPAPDC2	403313	1.14169	0.313979	0.727833
GNL3	26354	1.30875	0.143009	0.725878
ATF5	22809	0.89054	0.560826	0.725683
FAM110C	642273	0.922416	0.526213	0.724314
MALT1	10892	0.669098	0.775089	0.722094
ZNF706	51123	0.899977	0.542756	0.721366
PPCS	79717	1.06853	0.372871	0.720701
ZNF397	84307	0.833224	0.607657	0.72044
EPM2AIP1	9852	0.675692	0.764427	0.720059
TGIF1	7050	1.12132	0.315611	0.718467
PABPC1	26986	0.538067	0.895846	0.716956
RWDD3	25950	0.94422	0.487845	0.716033
NDUFA6	4700	0.878182	0.552978	0.71558
NIP7	51388	0.781197	0.649543	0.71537
EIF3D	8664	0.73234	0.697232	0.714786
EHF	26298	0.673498	0.75578	0.714639
HAS3	3038	1.0172	0.411295	0.714249
C11orf48	79081	0.883055	0.545089	0.714072
SPINT2	10653	1.03593	0.390155	0.713044
RPL31	6160	1.03018	0.392802	0.711493
ITPRIPL2	162073	0.842375	0.577562	0.709969
GSTO2	119391	0.848895	0.570809	0.709852
AXL	558	1.07798	0.339848	0.708912
CCNH	902	0.898853	0.518437	0.708645
POLR2B	5431	1.08596	0.330431	0.708196
MT1E	4493	1.20094	0.213284	0.70711
CTTN	2017	1.05521	0.358024	0.706615
TFCP2	7024	0.815016	0.597502	0.706259
PRMT5	10419	0.918683	0.493531	0.706107
CCT6A	908	0.630742	0.78091	0.705826
BTG1	694	0.88733	0.522797	0.705063
HNRNPU	3192	0.586882	0.822987	0.704935
RDH14	57665	0.530946	0.878014	0.70448
HMGB1	3146	1.05011	0.356274	0.703191
FHL2	2274	0.980566	0.424151	0.702359
ABHD3	171586	1.01767	0.385923	0.701794
EHBP1	23301	0.436158	0.964628	0.700393
ZNF485	220992	0.444535	0.956128	0.700331
ADORA2B	136	0.862508	0.537491	0.699999
TMEM238	388564	1.20886	0.188585	0.698723
IGF2BP3	10643	0.744608	0.652093	0.69835
PTTG1	9232	0.862584	0.532214	0.697399
TRMT13	54482	1.09877	0.295765	0.697266
FAM192A	80011	0.682125	0.710672	0.696399
PABPN1	8106	0.962984	0.429329	0.696157
TMEM66	51669	0.804387	0.586247	0.695317
ZNF189	7743	0.959259	0.431144	0.695202
FAM111A	63901	0.953974	0.436281	0.695127
CDK9	1025	0.753358	0.635653	0.694506
DDX17	10521	0.98341	0.402049	0.69273
HNRNPA3	220988	1.12431	0.260607	0.692458
ZFP36L1	677	0.735286	0.645225	0.690256
DUT	1854	1.01175	0.366498	0.689125
CENPM	79019	0.892317	0.484802	0.688559
AKIRIN2	55122	1.17974	0.196712	0.688225
GABARAPL1	23710	0.791557	0.580708	0.686133
DNAJC9	23234	1.07799	0.292459	0.685226
TUBB	203068	0.744286	0.624458	0.684372
PRR3	80742	1.06022	0.306523	0.683371
TRMT12	55039	0.94128	0.421628	0.681454
MRPL3	11222	0.781375	0.580929	0.681152
CSNK2A1	1457	0.679484	0.68189	0.680687
HELLS	3070	0.446341	0.914438	0.68039
MOSPD1	56180	0.956593	0.403144	0.679868
CPNE7	27132	0.850552	0.507989	0.67927
ZFAND5	7763	1.13351	0.220215	0.676864
MTUS1	57509	1.16955	0.182774	0.67616
CTNND1	1500	0.904679	0.447468	0.676074
MANF	7873	0.893234	0.458444	0.675839
FAT1	2195	0.638605	0.711603	0.675104
FOS	2353	0.497318	0.852298	0.674808
UTP3	57050	0.142516	1.20615	0.674335
RHOB	388	1.03575	0.311436	0.673592
CSNK1E	1454	0.98711	0.354485	0.670797
NDUFAF4	29078	0.605092	0.735147	0.67012
SLC35F3	148641	0.817026	0.520354	0.66869
ACYP1	97	0.94444	0.392348	0.668394
LTBR	4055	0.7897	0.545219	0.66746
CANT1	124583	0.417583	0.916286	0.666935
ACP1	52	0.909241	0.422649	0.665945
TAS2R31	259290	1.30214	0.0290932	0.665619
KCNRG	283518	0.831628	0.499549	0.665589
SLC7A5	8140	0.629347	0.701194	0.66527
TIPARP	25976	0.955443	0.373861	0.664652
CDC16	8881	1.09342	0.234131	0.663776
RPS20	6224	1.22279	0.0981691	0.660482
RBM22	55696	0.632174	0.68792	0.660047
CUL4A	8451	0.920037	0.398546	0.659292
LCN2	3934	0.851341	0.466784	0.659062
NIT1	4817	0.990024	0.327752	0.658888
TFAM	7019	0.804111	0.512472	0.658291
EBNA1BP2	10969	0.863627	0.452044	0.657836
EGFR	1956	0.819473	0.494857	0.657165
ITGA3	3675	0.770022	0.543497	0.656759
BIRC2	329	0.866082	0.445042	0.655562
WDR43	23160	0.604434	0.703172	0.653803
ZSCAN26	7741	0.664763	0.641648	0.653206
CFL2	1073	1.07787	0.228095	0.652984
PPP2CA	5515	1.11633	0.188315	0.652323
SOCS3	9021	0.918968	0.383518	0.651243
RPS24	6229	1.00231	0.299477	0.650894
IRF2BP2	359948	0.54097	0.760529	0.65075
CENPK	64105	0.818655	0.482682	0.650669
C6orf62	81688	0.800143	0.501169	0.650656
KLHL23	151230	0.639597	0.657596	0.648596
FUT4	2526	0.371311	0.924645	0.647978
B4GALT5	9334	0.819474	0.476204	0.647839
ZNF281	23528	1.13333	0.160703	0.647019
KIAA1586	57691	0.475863	0.818131	0.646997
MUM1	84939	0.871022	0.413362	0.642192
MAK16	84549	0.667781	0.616269	0.642025
PCBD2	84105	0.287354	0.995278	0.641316
ZNF764	92595	0.981308	0.300936	0.641122
PPTC7	160760	0.92136	0.360487	0.640923
SNF8	11267	0.86112	0.419978	0.640549
TSR1	55720	0.876154	0.404093	0.640123
GPR110	266977	0.896253	0.383519	0.639886
NDUFS8	4728	0.84141	0.437393	0.639401
GFPT1	2673	0.398184	0.877488	0.637836
NOL3	8996	0.783517	0.490168	0.636843
CENPH	64946	0.363129	0.906343	0.634736
CDCA7	83879	0.516389	0.750152	0.63327
TXNDC12	51060	0.917037	0.347724	0.63238
ZBTB20	26137	0.598015	0.663872	0.630943
ICT1	3396	0.810821	0.445604	0.628212
CACYBP	27101	1.01449	0.239088	0.626791
PPA1	5464	0.641271	0.611567	0.626419
EIF3A	8661	0.323589	0.927994	0.625791
TRMT5	57570	0.944148	0.3052	0.624674
ANKRD40	91369	1.07445	0.174454	0.624453
NAA50	80218	0.597767	0.64799	0.622879
SLC25A32	81034	0.868115	0.37606	0.622087
C6orf203	51250	1.14603	0.0962652	0.621147
E2F8	79733	0.778048	0.464175	0.621112
ARL4A	10124	0.436008	0.806005	0.621006
UTP11L	51118	0.840586	0.401266	0.620926
SLC10A5	347051	0.503906	0.735093	0.619499
SLC7A1	6541	1.06225	0.176052	0.619151
ASF1B	55723	0.789556	0.443232	0.616394
UBE2B	7320	0.579785	0.651832	0.615808
TARS	6897	0.857603	0.37299	0.615297
UNC119B	84747	1.01037	0.217599	0.613987
NAP1L4	4676	0.787468	0.435624	0.611546
GULP1	51454	0.898711	0.322716	0.610714
ZCCHC11	23318	0.523322	0.695999	0.609661
SFR1	119392	0.741213	0.477377	0.609295
C1QTNF6	114904	1.20396	0.0136778	0.608817
TES	26136	0.554109	0.662922	0.608516
SERPINB6	5269	0.817493	0.398655	0.608074
ANXA1	301	0.374792	0.840147	0.607469
HNRNPL	3191	0.837417	0.375859	0.606638
CPNE1	8904	0.846671	0.365774	0.606223
FTH1	2495	0.659801	0.551661	0.605731
RAD52	5893	0.730564	0.480882	0.605723
RPL37A	6168	0.870442	0.339065	0.604753
ARHGEF2	9181	0.656399	0.552963	0.604681
ZNF655	79027	0.517439	0.691714	0.604577
GDAP1	54332	0.503727	0.704872	0.6043
EIF4G1	1981	1.00867	0.199779	0.604227
LUC7L2	51631	0.822971	0.383831	0.603401
ABCC3	8714	0.704909	0.501562	0.603236
ZDHHC6	64429	0.378457	0.826112	0.602284
KIAA0754	643314	0.83252	0.370592	0.601556
YAP1	10413	0.448874	0.753962	0.601418
RPS18	6222	1.14524	0.0574916	0.601365
C5AR1	728	0.6819	0.52043	0.601165
ZRANB1	54764	0.711097	0.489864	0.600481
RPS27	6232	0.750094	0.450783	0.600438
CAV1	857	0.860356	0.339261	0.599808
C5orf34	375444	0.613207	0.585337	0.599272
KIAA0101	9768	0.119839	1.07634	0.598091
PNISR	25957	0.857235	0.338724	0.597979
OTUD1	220213	0.573987	0.620502	0.597244
KLHL9	55958	0.828906	0.365124	0.597015
HPS4	89781	0.751608	0.441756	0.596682
NDUFA7	4701	0.848231	0.345086	0.596659
SMAGP	57228	0.718386	0.474466	0.596426
PURB	5814	0.604139	0.588493	0.596316
FAM210A	125228	0.582388	0.609108	0.595748
MFI2	4241	0.80071	0.390581	0.595645
DNAJB4	11080	0.223511	0.96618	0.594845
MKI67	4288	0.303407	0.885938	0.594673
TBC1D31	93594	0.75775	0.430993	0.594372
KIAA0907	22889	0.579773	0.608784	0.594278
GALNT12	79695	0.721876	0.465206	0.593541
HNRNPC	3183	1.03612	0.150373	0.593248
MYOF	26509	1.05586	0.129346	0.592603
PNN	5411	1.03571	0.147992	0.591849
YWHAQ	10971	0.948381	0.234279	0.59133
C16orf46	123775	0.768115	0.413874	0.590994
COA3	28958	0.748919	0.431718	0.590319
GNG5	2787	0.871722	0.308772	0.590247
WSB1	26118	0.572792	0.606569	0.58968
NLGN2	57555	0.65675	0.521065	0.588908
RHOF	54509	0.875686	0.301832	0.588759
C22orf46	79640	0.894797	0.281119	0.587958
DEK	7913	0.487558	0.686643	0.5871
ARHGAP11A	9824	0.270536	0.903626	0.587081
PLSCR1	5359	0.581142	0.592303	0.586722
CCDC68	80323	0.818958	0.354447	0.586703
MSH5	4439	0.852661	0.32063	0.586645
ZNF24	7572	0.36987	0.798923	0.584397
RSPH3	83861	0.495366	0.672062	0.583714
CAMK2N1	55450	0.719681	0.446876	0.583279
ILF2	3608	0.855773	0.310006	0.582889
HELB	92797	0.782671	0.378585	0.580628
GLS	2744	0.408536	0.752223	0.580379
RNMT	8731	0.65344	0.505918	0.579679
C7orf49	78996	0.709947	0.44921	0.579578
GNL1	2794	0.776077	0.382356	0.579216
KITLG	4254	0.588816	0.567582	0.578199
SNX5	27131	0.540445	0.614931	0.577688
ZNF83	55769	0.770176	0.38436	0.577268
HMGN1	3150	1.02394	0.130477	0.577206
NDUFB8	4714	0.603357	0.550327	0.576842
LSM12	124801	0.758314	0.39179	0.575052
PLD3	23646	0.805108	0.344312	0.57471
HSPA8	3312	0.818982	0.330224	0.574603
TUBE1	51175	0.664606	0.484069	0.574337
DPAGT1	1798	1.04255	0.104171	0.573359
SUPT16H	11198	0.99827	0.143545	0.570908
TWIST1	7291	0.815162	0.325794	0.570478
CLDN12	9069	0.878074	0.261096	0.569585
MFGE8	4240	0.77061	0.367066	0.568838
USP53	54532	0.76573	0.371856	0.568793
NUPL2	11097	0.843793	0.292289	0.568041
TYMS	7298	0.77263	0.36339	0.56801
ACSL5	51703	0.669572	0.46617	0.567871
PIGC	5279	1.0117	0.123532	0.567617
CNBP	7555	0.997319	0.137838	0.567579
DIS3	22894	0.70239	0.432	0.567195
ANKRD18A	253650	0.698516	0.435146	0.566831
RER1	11079	0.860946	0.270992	0.565969
CDC45	8318	0.584606	0.546411	0.565509
CDK2	1017	0.676046	0.454211	0.565129
XPNPEP1	7511	1.02687	0.103232	0.56505
XRCC2	7516	0.580119	0.549864	0.564991
RHEB	6009	0.876918	0.253048	0.564983
TMEM158	25907	0.422578	0.707266	0.564922
SSR3	6747	0.761909	0.367626	0.564768
HIST2H2BE	8349	0.488802	0.639999	0.5644
DBF4	10926	0.48955	0.637728	0.563639
CENPE	1062	0.267195	0.857974	0.562585
XBP1	7494	0.275176	0.849616	0.562396
ABO	28	0.810002	0.314529	0.562265
CYP20A1	57404	0.833656	0.290853	0.562255
PPP2CB	5516	0.674714	0.448247	0.56148
EIF3J	8669	0.592417	0.530382	0.5614
COMMD3	23412	0.449359	0.672532	0.560946
TM7SF3	51768	0.419985	0.701567	0.560776
EEF1A1	1915	0.186688	0.934828	0.560758
LTA4H	4048	0.495274	0.6261	0.560687
HSD17B11	51170	0.732689	0.38757	0.560129
B2M	567	0.780122	0.340099	0.56011
MTHFD1L	25902	0.683964	0.436249	0.560106
UBXN4	23190	0.453054	0.665706	0.55938
DUSP4	1846	0.483733	0.632876	0.558304
MLEC	9761	0.708443	0.407919	0.558181
CCP110	9738	0.633655	0.481952	0.557804
SF3A2	8175	0.606825	0.507494	0.55716
CCDC43	124808	1.07856	0.0350694	0.556816
RNF8	9025	0.819285	0.292959	0.556122
RPS15A	6210	1.07599	0.0360589	0.556027
NGDN	25983	0.633505	0.476809	0.555157
CHD4	1108	0.931585	0.177983	0.554784
TMEM41B	440026	0.545814	0.56149	0.553652
GPN2	54707	0.604337	0.502181	0.553259
JRKL	8690	0.465799	0.63998	0.552889
GOLM1	51280	0.35334	0.751761	0.552551
E2F7	144455	0.710152	0.394433	0.552292
MIS12	79003	0.64367	0.459378	0.551524
AZIN1	51582	0.632416	0.470021	0.551218
CKAP4	10970	0.799269	0.302492	0.550881
ARHGAP18	93663	0.754381	0.347069	0.550725
NCOR1	9611	0.776236	0.323666	0.549951
SAP18	10284	0.815377	0.284456	0.549917
SPATS2	65244	0.473947	0.625848	0.549897
SPRY4	81848	0.57153	0.526635	0.549083
PYGB	5834	0.907672	0.189747	0.54871
TSPYL1	7259	0.350546	0.744834	0.54769
SEC61A1	29927	0.827489	0.267083	0.547286
HNRNPK	3190	0.539582	0.554294	0.546938
TXNRD1	7296	0.652393	0.439724	0.546059
LIPT1	51601	0.716192	0.374681	0.545436
TICAM2	353376	0.136291	0.954542	0.545417
SREBF2	6721	0.95281	0.13797	0.54539
BCS1L	617	1.02849	0.0614112	0.544951
EPCAM	4072	0.509512	0.580125	0.544818
MSH6	2956	0.690748	0.398695	0.544722
TMEM123	114908	0.644502	0.443868	0.544185
ANKRD11	29123	0.727478	0.359527	0.543502
ZC3H15	55854	0.328355	0.757327	0.542841
SMC4	10051	0.256961	0.828643	0.542802
WDR1	9948	0.755294	0.327778	0.541536
HAX1	10456	0.920567	0.162491	0.541529
GPR75	10936	0.657006	0.424846	0.540926
TMED2	10959	0.57092	0.509087	0.540003
SHFM1	7979	0.627075	0.45283	0.539953
SERP1	27230	0.760045	0.317944	0.538995
MRPS18C	51023	0.191038	0.885701	0.53837
TSEN54	283989	0.658514	0.416885	0.537699
ZNF721	170960	0.679036	0.395211	0.537123
DYNLT1	6993	0.581357	0.492064	0.53671
GLUL	2752	0.804358	0.268891	0.536624
PAK1IP1	55003	0.545441	0.526024	0.535732
NT5E	4907	0.210993	0.859564	0.535278
PANK2	80025	0.581657	0.488476	0.535066
TOB1	10140	0.624439	0.444061	0.53425
PFN1	5216	0.565935	0.502161	0.534048
GEM	2669	0.714174	0.353774	0.533974
YBX3	8531	0.711322	0.35571	0.533516
C14orf142	84520	0.558101	0.508399	0.53325
DONSON	29980	0.788441	0.27791	0.533176
ENOSF1	55556	0.977165	0.0891063	0.533136
ATP5H	10476	0.65881	0.405459	0.532134
TOMM5	401505	0.455438	0.607979	0.531709
SC5D	6309	0.661041	0.401926	0.531484
CANX	821	0.357053	0.705865	0.531459
RAB9A	9367	0.719717	0.342872	0.531294
GEMIN2	8487	0.71674	0.345723	0.531232
HOXA10	3206	0.399511	0.662417	0.530964
PPP2R1A	5518	0.712904	0.347776	0.53034
CLCC1	23155	0.73999	0.319475	0.529733
RPL32	6161	0.996888	0.0625389	0.529713
CCNL1	57018	0.669124	0.389095	0.52911
KLRC3	3823	0.617323	0.438477	0.5279
ZDHHC4	55146	0.296593	0.757449	0.527021
RCC2	55920	0.994352	0.0595681	0.52696
CBFB	865	0.617435	0.435091	0.526263
ADAM19	8728	0.666611	0.3842	0.525406
RBM15	64783	0.64781	0.401277	0.524544
NUP107	57122	0.640947	0.407476	0.524212
MNT	4335	0.806389	0.240759	0.523574
PHC2	1912	0.709204	0.336739	0.522972
RSL1D1	26156	0.482913	0.562888	0.5229
PRDX3	10935	0.460525	0.584373	0.522449
LDHA	3939	0.693137	0.350406	0.521772
CLDN3	1365	0.555275	0.487271	0.521273
FANCF	2188	0.666168	0.376237	0.521203
TEX12	56158	0.559579	0.482229	0.520904
COMMD6	170622	0.620114	0.421426	0.52077
RBX1	9978	0.544361	0.497071	0.520716
BAIAP2L1	55971	0.587834	0.452987	0.52041
TTC19	54902	0.213186	0.82732	0.520253
PHF3	23469	0.908482	0.131449	0.519966
RNF138	51444	0.380245	0.657537	0.518891
MRPL27	51264	0.600996	0.436758	0.518877
SLC25A3	5250	0.540567	0.49609	0.518328
HMMR	3161	0.165931	0.870274	0.518102
TROVE2	6738	0.589411	0.44607	0.517741
SERTAD2	9792	0.59314	0.44201	0.517575
ZCRB1	85437	0.68885	0.345692	0.517271
TRMT61B	55006	0.763865	0.26883	0.516347
NDUFC1	4717	0.589973	0.442317	0.516145
INO80B	83444	0.72303	0.309221	0.516125
HIGD1A	25994	0.665394	0.366767	0.51608
LSM10	84967	0.236245	0.795317	0.515781
MUTYH	4595	0.755255	0.276019	0.515637
MTO1	25821	0.816905	0.213594	0.515249
NR6A1	2649	0.677582	0.352255	0.514918
AGPAT4	56895	0.395193	0.633598	0.514396
DGKA	1606	0.725859	0.301565	0.513712
PLAUR	5329	0.637147	0.38951	0.513328
PRR13	54458	0.715788	0.310593	0.513191
RPS23	6228	0.134396	0.891069	0.512732
SERINC3	10955	0.803705	0.221085	0.512395
WEE1	7465	0.625639	0.398826	0.512232
MTHFD2	10797	0.673503	0.349639	0.511571
KHDRBS1	10657	0.500781	0.52174	0.51126
PVRL3	25945	0.616306	0.405105	0.510706
RPL11	6135	0.952956	0.0681758	0.510566
ORC6	23594	0.721372	0.299586	0.510479
TMEM200A	114801	0.643622	0.377122	0.510372
TFG	10342	0.490165	0.529911	0.510038
PDCD11	22984	0.79316	0.226867	0.510014
ADO	84890	0.855111	0.164006	0.509558
GGPS1	9453	0.490298	0.525235	0.507766
CTNNAL1	8727	0.636834	0.378623	0.507729
TMEM106C	79022	0.346061	0.668842	0.507451
CENPF	1063	0.354151	0.660217	0.507184
SLC30A5	64924	0.559409	0.45477	0.507089
RBBP4	5928	0.663028	0.350483	0.506755
CCNT2	905	0.575725	0.437112	0.506418
CD274	29126	0.0837985	0.927052	0.505425
ALG13	79868	0.688238	0.322231	0.505235
ESRP1	54845	0.452227	0.557514	0.50487
HSPA9	3313	0.781379	0.228066	0.504723
SLC48A1	55652	0.418967	0.589288	0.504128
RPLP0	6175	0.713053	0.295079	0.504066
H3F3A	3020	0.568318	0.439157	0.503737
GOLT1A	127845	0.784703	0.22235	0.503527
WDR82	80335	0.57429	0.432027	0.503159
FOXK2	3607	0.661621	0.344029	0.502825
ITGA6	3655	0.113727	0.890391	0.502059
TSEN15	116461	0.456622	0.546978	0.5018
SLC23A3	151295	0.748925	0.253741	0.501333
PAICS	10606	0.603909	0.398445	0.501177
TBL2	26608	0.689912	0.31191	0.500911
KRT8	3856	0.595825	0.405679	0.500752
LSM5	23658	0.926655	0.0742433	0.500449
NUF2	83540	0.554286	0.446592	0.500439
BDNF	627	0.722157	0.276043	0.4991
BRD2	6046	0.485299	0.511543	0.498421
TOMM40	10452	0.596343	0.399477	0.49791
PPIF	10105	0.586139	0.409588	0.497864
RRP36	88745	0.991022	0.00468849	0.497855
SLC29A2	3177	0.709667	0.285809	0.497738
PAQR8	85315	0.592806	0.401861	0.497333
TBRG1	84897	0.647424	0.34708	0.497252
MDH1	4190	0.46037	0.534049	0.497209
TMEM139	135932	0.515778	0.478406	0.497092
OTUD3	23252	0.612854	0.37982	0.496337
EAPP	55837	0.430486	0.55984	0.495163
CBLN3	643866	0.38192	0.608079	0.494999
C1orf116	79098	0.546481	0.443466	0.494973
TBC1D8	11138	0.635528	0.352214	0.493871
FASTKD5	60493	0.54178	0.445929	0.493855
LAMTOR5	10542	0.750567	0.235579	0.493073
SOCS2	8835	0.509287	0.476149	0.492718
SLFN5	162394	0.172105	0.812402	0.492253
DNAJB11	51726	0.497972	0.486486	0.492229
MRPS14	63931	0.755763	0.228401	0.492082
NACA	4666	0.66171	0.322199	0.491954
RPL39	6170	0.471973	0.510476	0.491224
TIAF1	9220	0.459889	0.521743	0.490816
KBTBD2	25948	0.572146	0.408683	0.490414
IQCB1	9657	0.597472	0.382891	0.490182
RNF146	81847	0.906814	0.0724755	0.489645
CCSAP	126731	0.618174	0.360002	0.489088
C3orf17	25871	0.897045	0.0810347	0.48904
ZNF830	91603	0.573451	0.404396	0.488923
CDC14B	8555	0.5826	0.394809	0.488705
PSMD4	5710	0.549995	0.426453	0.488224
WBP5	51186	0.385799	0.58912	0.48746
ERH	2079	0.556719	0.418191	0.487455
TMUB1	83590	0.582102	0.392101	0.487102
CEP72	55722	0.591404	0.382759	0.487081
TMEM222	84065	0.570162	0.403078	0.48662
PITHD1	57095	0.407159	0.566018	0.486589
DIMT1	27292	0.508103	0.463951	0.486027
PABPC4	8761	0.381425	0.590433	0.485929
HP1BP3	50809	0.463535	0.508212	0.485873
CCNB1IP1	57820	0.764728	0.206801	0.485764
TRIAP1	51499	0.952238	0.0171377	0.484688
ADPRM	56985	0.526539	0.442677	0.484608
BTF3	689	0.360859	0.608326	0.484592
MBNL2	10150	0.576438	0.392538	0.484488
SSRP1	6749	0.563468	0.404595	0.484032
NDRG1	10397	0.531767	0.435321	0.483544
ZNF789	285989	0.673486	0.293395	0.48344
ZCCHC6	79670	0.597615	0.368638	0.483126
CAMK2D	817	0.487933	0.476062	0.481998
ETV5	2119	0.430069	0.532677	0.481373
LZIC	84328	0.283153	0.679456	0.481304
ECHDC1	55862	0.424396	0.537528	0.480962
FDPS	2224	0.771131	0.190787	0.480959
ENSA	2029	0.910121	0.0505769	0.480349
TIA1	7072	0.432695	0.527912	0.480303
SEPW1	6415	0.496439	0.463262	0.47985
BUB1B	701	0.411873	0.546856	0.479364
STIL	6491	0.472494	0.485423	0.478959
PPM1G	5496	0.79921	0.158372	0.478791
ZNF496	84838	0.924792	0.0326555	0.478724
ATP5J2	9551	0.60503	0.351134	0.478082
GDA	9615	0.406987	0.54865	0.477819
RTN4	57142	0.0157051	0.937745	0.476725
COX6A1	1337	0.380159	0.572761	0.47646
PDE12	201626	0.359759	0.592253	0.476006
ETHE1	23474	0.552364	0.39922	0.475792
LRRC59	55379	0.630723	0.319901	0.475312
DSG2	1829	0.396148	0.554291	0.475219
ARL4C	10123	0.513327	0.436971	0.475149
RHBDF2	79651	0.452001	0.498083	0.475042
ZYX	7791	0.575679	0.374219	0.474949
EIF4A1	1973	0.403417	0.545719	0.474568
YWHAZ	7534	0.386356	0.562351	0.474354
CD58	965	0.375638	0.572695	0.474166
ANKLE2	23141	0.248488	0.699346	0.473917
GPR125	166647	0.435801	0.511174	0.473487
CCPG1	9236	0.754741	0.191827	0.473284
CTPS1	1503	0.801935	0.143796	0.472865
MRPL19	9801	0.493778	0.451575	0.472677
CHAMP1	283489	0.197995	0.746375	0.472185
HMGCR	3156	0.58034	0.361823	0.471081
SMC3	9126	0.542856	0.399067	0.470961
SEC14L1	6397	0.752086	0.189671	0.470879
ZNF37A	7587	0.741013	0.200136	0.470574
POLE3	54107	0.506862	0.433986	0.470424
CALCOCO2	10241	0.520052	0.420251	0.470151
CLDND1	56650	0.174695	0.76501	0.469852
NAA25	80018	0.521962	0.416029	0.468996
SFXN4	119559	0.708354	0.228387	0.468371
PAIP1	10605	0.802086	0.134527	0.468307
WDR96	80217	0.543878	0.39246	0.468169
ZNF343	79175	0.68082	0.254574	0.467697
RPE	6120	0.601777	0.33301	0.467393
FUBP1	8880	0.802439	0.131675	0.467057
NUP98	4928	0.441858	0.492088	0.466973
LPGAT1	9926	0.26447	0.669302	0.466886
TATDN1	83940	0.388747	0.544231	0.466489
BARD1	580	0.324304	0.607577	0.465941
GCLC	2729	0.627671	0.304128	0.465899
CCDC57	284001	0.36311	0.568635	0.465873
AP1S3	130340	0.337822	0.593507	0.465665
NSRP1	84081	0.423649	0.50713	0.46539
VARS	7407	0.539452	0.391114	0.465283
TIAL1	7073	0.358572	0.571889	0.46523
SLC18B1	116843	0.50436	0.426003	0.465182
ZBED5	58486	0.550916	0.379316	0.465116
MAD2L1	4085	0.298697	0.630623	0.46466
CTSZ	1522	0.668912	0.260126	0.464519
YBX1	4904	0.26378	0.664204	0.463992
FLYWCH1	84256	0.481917	0.445783	0.46385
PAF1	54623	0.578303	0.348844	0.463573
PTRHD1	391356	0.0653228	0.861015	0.463169
SSH1	54434	0.633327	0.292594	0.462961
CTC1	80169	0.668563	0.257133	0.462848
LENG8	114823	0.667673	0.257563	0.462618
DMKN	93099	0.640329	0.284343	0.462336
GLO1	2739	0.526518	0.396171	0.461345
RPL8	6132	0.513698	0.40894	0.461319
ZNF518B	85460	0.584205	0.338225	0.461215
ZNF259	8882	0.733135	0.189196	0.461166
TRIM13	10206	0.490017	0.431067	0.460542
PDIA6	10130	0.667053	0.252748	0.4599
RFK	55312	0.642235	0.277297	0.459766
ATP6V0B	533	0.866044	0.0533904	0.459717
KNOP1	400506	0.584106	0.335047	0.459577
NFE2L1	4779	0.503446	0.412435	0.45794
GAMT	2593	0.678655	0.236775	0.457715
CHMP1B	57132	0.353784	0.558278	0.456031
WDR11	55717	0.28887	0.62307	0.45597
HAUS4	54930	0.157122	0.754812	0.455967
CNIH1	10175	0.169804	0.741467	0.455636
CATSPER2	117155	0.860161	0.0509912	0.455576
CEP95	90799	0.833068	0.0780511	0.45556
C16orf72	29035	0.445036	0.465929	0.455482
NADK	65220	0.55681	0.353393	0.455102
CHUK	1147	0.674297	0.235881	0.455089
ACTB	60	0.0400313	0.870035	0.455033
DCAF16	54876	0.838421	0.0706192	0.45452
RPS8	6202	0.703119	0.205795	0.454457
HNRNPA2B1	3181	0.330794	0.576987	0.453891
YARS	8565	0.703837	0.203889	0.453863
ADAM17	6868	0.558195	0.349196	0.453696
PKM	5315	0.424571	0.482043	0.453307
UBC	7316	0.496327	0.410266	0.453297
EID3	493861	0.698874	0.206994	0.452934
TEFM	79736	0.693326	0.212474	0.4529
FPGT	8790	0.447223	0.458431	0.452827
STAMBP	10617	0.647404	0.25802	0.452712
CCNC	892	0.348002	0.557176	0.452589
MRFAP1	93621	0.458249	0.445657	0.451953
MYL12B	103910	0.47065	0.433066	0.451858
TSPAN14	81619	0.645411	0.257634	0.451522
REXO2	25996	0.454337	0.448546	0.451442
FXYD5	53827	0.627364	0.274524	0.450944
KCNIP2	30819	0.634222	0.266205	0.450213
HNRNPH1	3187	0.563961	0.335775	0.449868
SPTLC1	10558	0.734776	0.164335	0.449555
EXOSC8	11340	0.54681	0.351449	0.449129
RIPK1	8737	0.492605	0.40163	0.447118
MRPL30	51263	0.537389	0.356824	0.447106
TGFBR2	7048	0.323232	0.569938	0.446585
DNA2	1763	0.339769	0.552958	0.446363
CCT4	10575	0.562873	0.329758	0.446316
PSMA2	5683	0.710488	0.181607	0.446047
MCOLN3	55283	0.603043	0.289009	0.446026
OGFRL1	79627	0.510015	0.381814	0.445915
TOMM22	56993	0.57167	0.319487	0.445579
ARHGAP12	94134	0.336938	0.552507	0.444722
RNASEH1	246243	0.631716	0.257655	0.444686
DDX46	9879	0.653822	0.234958	0.44439
FTSJ3	117246	0.854564	0.0341943	0.444379
CHEK1	1111	0.430515	0.458175	0.444345
ZRANB2	9406	0.0838139	0.80447	0.444142
ZMYM1	79830	0.423915	0.464249	0.444082
ENC1	8507	0.869025	0.0186872	0.443856
RIOK2	55781	0.459788	0.427811	0.443799
EP300	2033	0.582493	0.303322	0.442907
IMMP1L	196294	0.66001	0.225442	0.442726
NIFK	84365	0.475586	0.409415	0.4425
DNAJC19	131118	0.546514	0.337868	0.442191
SYPL1	6856	0.567429	0.31584	0.441635
KDM1A	23028	0.456942	0.42426	0.440601
KPNB1	3837	0.664109	0.216688	0.440398
TIMM17A	10440	0.2886	0.592042	0.440321
DAP	1611	0.743058	0.136082	0.43957
FAM200B	285550	0.0290537	0.849832	0.439443
AVPI1	60370	0.843766	0.0350008	0.439383
DCAF8	50717	0.573468	0.30524	0.439354
CCT8	10694	0.776712	0.101024	0.438868
PLAU	5328	0.485303	0.39216	0.438731
POLR2A	5430	0.52979	0.347359	0.438575
DSCC1	79075	0.397338	0.479504	0.438421
MBOAT2	129642	0.383868	0.492774	0.438321
SFXN3	81855	0.500775	0.374148	0.437462
NECAP1	25977	0.655412	0.218604	0.437008
HSBP1L1	440498	0.572202	0.301587	0.436895
DNMT3B	1789	0.571329	0.302269	0.436799
CDCA2	157313	0.316881	0.556121	0.436501
ORAI3	93129	0.400317	0.472458	0.436387
GTF2A1	2957	0.572019	0.299815	0.435917
AAGAB	79719	0.624784	0.246355	0.435569
FASTKD2	22868	0.642364	0.227362	0.434863
FAM178A	55719	0.481052	0.388393	0.434722
C14orf119	55017	0.503944	0.365498	0.434721
HMGB3	3149	0.514956	0.354455	0.434705
TNFRSF10B	8795	0.254169	0.614984	0.434576
TCP1	6950	0.432335	0.436757	0.434546
SRSF9	8683	0.254091	0.614365	0.434228
CWF19L1	55280	0.700993	0.167387	0.43419
ZNF587	84914	0.702547	0.165001	0.433774
PEX2	5828	0.550401	0.316006	0.433204
SET	6418	0.561048	0.305212	0.43313
TMEM70	54968	0.355629	0.509392	0.432511
AARS	16	0.78501	0.0795892	0.4323
RNPEP	6051	0.718358	0.146023	0.43219
ADAM9	8754	0.612408	0.251348	0.431878
TRAM1	23471	0.348055	0.515531	0.431793
ARF6	382	0.0264651	0.836712	0.431588
ZZZ3	26009	0.474375	0.388752	0.431564
GAS8	2622	0.478739	0.383898	0.431318
PM20D2	135293	0.550212	0.310827	0.430519
NARS	4677	0.335367	0.525573	0.43047
CNPY3	10695	0.657656	0.203185	0.43042
TIMMDC1	51300	0.484337	0.376374	0.430355
PLK4	10733	0.411916	0.448228	0.430072
CTDSP1	58190	0.254328	0.60545	0.429889
SNRPD3	6634	0.653414	0.205908	0.429661
GJB2	2706	0.608974	0.250337	0.429656
MTX3	345778	0.454156	0.404973	0.429564
ZC3H11A	9877	0.351168	0.507679	0.429423
HRSP12	10247	0.408121	0.4503	0.42921
RNF34	80196	0.612739	0.245179	0.428959
MARS	4141	0.729088	0.128455	0.428771
MSMO1	6307	0.482237	0.374219	0.428228
EGR3	1960	0.287981	0.568188	0.428084
RFC3	5983	0.407272	0.44804	0.427656
DCAF11	80344	0.299853	0.554246	0.42705
TMEM106B	54664	0.051338	0.802553	0.426945
EXOSC9	5393	0.384611	0.468797	0.426704
MASTL	84930	0.509853	0.342496	0.426174
SMIM4	440957	0.745999	0.106085	0.426042
C12orf61	283416	0.652683	0.197957	0.42532
TPP2	7174	0.543012	0.307611	0.425312
MTRNR2L1	100462977	0.448807	0.401379	0.425093
KANSL3	55683	0.31487	0.533936	0.424403
TSPAN6	7105	0.348044	0.500669	0.424356
RPS3A	6189	0.674997	0.173225	0.424111
ISCU	23479	0.36178	0.485998	0.423889
OCIAD1	54940	0.217978	0.629278	0.423628
CASC3	22794	0.839817	0.00741285	0.423615
FTL	2512	0.459353	0.387733	0.423543
BLOC1S2	282991	0.616681	0.230087	0.423384
STK17B	9262	0.611815	0.234411	0.423113
RAB11FIP2	22841	0.159175	0.686195	0.422685
AEN	64782	0.592718	0.251638	0.422178
ALDH1A3	220	0.658827	0.18546	0.422143
MDP1	145553	0.591925	0.250754	0.42134
KHNYN	23351	0.414977	0.427085	0.421031
JUN	3725	0.562771	0.279267	0.421019
MPHOSPH6	10200	0.426529	0.415274	0.420902
TRAF3	7187	0.492758	0.348746	0.420752
SLC36A4	120103	0.426399	0.414661	0.42053
SNRNP27	11017	0.839763	0.00103819	0.420401
ACBD3	64746	0.563287	0.277508	0.420398
SH3YL1	26751	0.169236	0.670912	0.420074
LAMC2	3918	0.487511	0.352276	0.419893
LIF	3976	0.489192	0.350348	0.41977
NDC80	10403	0.213773	0.625095	0.419434
VCPKMT	79609	0.40977	0.428806	0.419288
MPRIP	23164	0.577935	0.260339	0.419137
CCDC18	343099	0.343196	0.494934	0.419065
BCAR3	8412	0.315545	0.522558	0.419051
CYB5D1	124637	0.822677	0.0154184	0.419047
LPCAT3	10162	0.450623	0.387245	0.418934
USP10	9100	0.614463	0.223301	0.418882
CBLL1	79872	0.380153	0.456661	0.418407
APH1A	51107	0.21837	0.618279	0.418324
RCC1	1104	0.604445	0.232091	0.418268
ELMOD2	255520	0.235989	0.600426	0.418208
RBMS2	5939	0.560512	0.274329	0.41742
RFXAP	5994	0.3136	0.521132	0.417366
PRDX1	5052	0.64754	0.187101	0.417321
NDC1	55706	0.424014	0.410056	0.417035
ABHD17C	58489	0.685498	0.148126	0.416812
C18orf21	83608	0.173929	0.659663	0.416796
SAP30	8819	0.213963	0.6195	0.416731
METTL10	399818	0.284906	0.54784	0.416373
HNRNPAB	3182	0.507477	0.324063	0.41577
DESI1	27351	0.460449	0.370051	0.41525
VMP1	81671	0.490098	0.340218	0.415158
TRIT1	54802	0.691769	0.13837	0.415069
RAB8A	4218	0.414643	0.41503	0.414836
CLK1	1195	0.775655	0.0537758	0.414716
MCM6	4175	0.342521	0.486697	0.414609
BRIX1	55299	0.315702	0.513248	0.414475
C21orf59	56683	0.190792	0.63799	0.414391
PRIM2	5558	0.412461	0.41632	0.414391
DEGS1	8560	0.616266	0.211853	0.41406
NDUFB9	4715	0.635018	0.193016	0.414017
PMS1	5378	0.487583	0.340378	0.413981
MRPS26	64949	0.56277	0.26437	0.41357
EPT1	85465	0.308074	0.519044	0.413559
SFT2D2	375035	0.499668	0.327371	0.41352
NFAT5	10725	0.433818	0.393036	0.413427
MTHFSD	64779	0.588364	0.238095	0.413229
SLMAP	7871	0.385942	0.440285	0.413113
TUBA1C	84790	0.140839	0.685087	0.412963
TMEM63B	55362	0.485694	0.339686	0.41269
NUP43	348995	0.671232	0.153907	0.41257
ARF3	377	0.653605	0.170862	0.412234
ZNF544	27300	0.598367	0.226059	0.412213
DCUN1D3	123879	0.555293	0.268446	0.411869
SPDL1	54908	0.269578	0.553502	0.41154
TK1	7083	0.617469	0.204921	0.411195
XPO7	23039	0.362278	0.459684	0.410981
YWHAB	7529	0.558708	0.263219	0.410964
SEC11A	23478	0.417509	0.404329	0.410919
SUMO1	7341	0.481247	0.340574	0.41091
FANCL	55120	0.163254	0.657911	0.410582
KRR1	11103	0.0999606	0.72108	0.410521
RHBDD1	84236	0.314965	0.50578	0.410372
TMED5	50999	0.360453	0.459708	0.41008
EIF4EBP2	1979	0.580615	0.239156	0.409885
IL18	3606	0.383787	0.435889	0.409838
CRIPT	9419	0.546982	0.272414	0.409698
CASC4	113201	0.515425	0.303826	0.409626
MED6	10001	0.349065	0.46993	0.409497
HADH	3033	0.656107	0.162087	0.409097
PRPF39	55015	0.420527	0.396892	0.40871
FNDC3B	64778	0.329257	0.487706	0.408482
FEZ2	9637	0.676655	0.140301	0.408478
IPO8	10526	0.546208	0.270133	0.40817
MRPS36	92259	0.561166	0.254118	0.407642
GLG1	2734	0.419269	0.39586	0.407565
SEH1L	81929	0.338102	0.476816	0.407459
GEN1	348654	0.327876	0.486136	0.407006
YWHAH	7533	0.699485	0.113857	0.406671
COMT	1312	0.351938	0.461317	0.406628
OR6A2	8590	0.0627429	0.750179	0.406461
CDC6	990	0.432139	0.379965	0.406052
DCTD	1635	0.560557	0.251149	0.405853
ELP3	55140	0.496604	0.314545	0.405575
ATAD5	79915	0.586516	0.224588	0.405552
H1F0	3005	0.178344	0.6327	0.405522
KIF11	3832	0.445712	0.364545	0.405129
LTBP3	4054	0.675672	0.133726	0.404699
PNRC2	55629	0.524452	0.284376	0.404414
SUGT1	10910	0.398299	0.410325	0.404312
EIF2S2	8894	0.58178	0.225785	0.403783
CDK7	1022	0.361007	0.44598	0.403493
TRIM66	9866	0.717485	0.088827	0.403156
ZXDB	158586	0.442889	0.363318	0.403103
CEP57	9702	0.434782	0.371251	0.403016
GFM1	85476	0.502714	0.302833	0.402773
RPN2	6185	0.49721	0.307539	0.402374
PTPMT1	114971	0.419933	0.384774	0.402353
LEPROTL1	23484	0.554925	0.249669	0.402297
KIAA0430	9665	0.51315	0.290892	0.402021
NUFIP2	57532	0.532578	0.270698	0.401638
PEAR1	375033	0.525854	0.277286	0.40157
FRA10AC1	118924	0.481932	0.320183	0.401058
KIAA0226L	80183	0.588471	0.212603	0.400537
PRKDC	5591	0.482548	0.318378	0.400463
ZNF512	84450	0.479038	0.321718	0.400378
YIPF5	81555	0.496541	0.302491	0.399516
CD44	960	0.321977	0.476996	0.399487
CALR	811	0.397675	0.40066	0.399168
JOSD1	9929	0.512406	0.285917	0.399161
FAM98B	283742	0.567729	0.229988	0.398859
AHSA1	10598	0.435605	0.361966	0.398786
TCEB1	6921	0.434274	0.362894	0.398584
AKAP2	11217	0.52567	0.271273	0.398471
CYR61	3491	0.589112	0.207063	0.398087
DYNLT3	6990	0.367965	0.427688	0.397826
HIAT1	64645	0.523718	0.271907	0.397812
POLR3G	10622	0.506583	0.288998	0.39779
PAFAH1B2	5049	0.169607	0.625885	0.397746
RNF5	6048	0.770355	0.0248432	0.397599
TMEM170A	124491	0.629721	0.165451	0.397586
EIF2B1	1967	0.536865	0.258192	0.397528
TAF8	129685	0.499022	0.294524	0.396773
LYSMD4	145748	0.341527	0.450688	0.396108
PRPF38B	55119	0.148092	0.643758	0.395925
SPRED2	200734	0.411941	0.37987	0.395905
RPL19	6143	0.685213	0.106429	0.395821
DTYMK	1841	0.559184	0.232318	0.395751
CDK10	8558	0.512297	0.278676	0.395487
DAP3	7818	0.617666	0.173102	0.395384
TIGD2	166815	0.371942	0.418762	0.395352
ITGA2	3673	0.258729	0.53194	0.395334
RSRC2	65117	0.380562	0.409889	0.395226
RAB10	10890	0.478866	0.311563	0.395215
HNRNPF	3185	0.564216	0.224589	0.394402
WDR83OS	51398	0.0347549	0.753833	0.394294
JAGN1	84522	0.231422	0.557152	0.394287
MALSU1	115416	0.233617	0.55475	0.394184
AREL1	9870	0.317649	0.470577	0.394113
GTF2H4	2968	0.504443	0.283731	0.394087
ANXA11	311	0.749712	0.0383056	0.394009
CTBS	1486	0.291847	0.4961	0.393974
EIF4A3	9775	0.646289	0.141426	0.393858
HES1	3280	0.424432	0.362959	0.393695
ACTR5	79913	0.530474	0.256829	0.393651
CHPT1	56994	0.332585	0.454338	0.393462
SURF6	6838	0.261391	0.525498	0.393445
G2E3	55632	0.27288	0.51383	0.393355
PTGES3	10728	0.668632	0.117199	0.392915
L3MBTL1	26013	0.516449	0.268793	0.392621
EXOSC1	51013	0.414995	0.370004	0.3925
PGM3	5238	0.491431	0.293164	0.392297
PYCR2	29920	0.518579	0.265985	0.392282
RPL15	6138	0.380679	0.403103	0.391891
SLC30A3	7781	0.663714	0.119903	0.391808
EIF5B	9669	0.409957	0.373643	0.3918
MTF2	22823	0.402151	0.380948	0.39155
KLHDC3	116138	0.591614	0.191468	0.391541
RAP2B	5912	0.465612	0.317288	0.39145
GCC1	79571	0.622411	0.158971	0.390691
NHLRC2	374354	0.429379	0.351691	0.390535
VTI1A	143187	0.299022	0.48138	0.390201
CPNE3	8895	0.448467	0.330805	0.389636
MXI1	4601	0.654698	0.124422	0.38956
VAPA	9218	0.444358	0.334603	0.38948
CSTF3	1479	0.112572	0.666303	0.389437
PARP4	143	0.461379	0.316519	0.388949
IER3IP1	51124	0.590689	0.187123	0.388906
OSTC	58505	0.737812	0.0394908	0.388651
TMEM242	729515	0.36553	0.41069	0.38811
PPP1R10	5514	0.667814	0.107193	0.387503
VHL	7428	0.271554	0.503188	0.387371
MAVS	57506	0.625359	0.149238	0.387299
STRAP	11171	0.391966	0.382553	0.38726
GABBR1	2550	0.537201	0.23715	0.387175
WDR74	54663	0.518937	0.255358	0.387147
ZNF212	7988	0.362749	0.411489	0.387119
KIAA1147	57189	0.592476	0.181494	0.386985
SUPT6H	6830	0.409208	0.364624	0.386916
KLC2	64837	0.415643	0.357134	0.386388
WASF1	8936	0.403328	0.369063	0.386196
RBFOX2	23543	0.358879	0.413427	0.386153
CRIPAK	285464	0.678506	0.0934324	0.385969
TGOLN2	10618	0.755902	0.0158216	0.385862
NISCH	11188	0.587393	0.184314	0.385854
LTV1	84946	0.216199	0.55532	0.385759
DYNC1LI2	1783	0.523451	0.247805	0.385628
C22orf29	79680	0.45491	0.315976	0.385443
GPBP1	65056	0.431254	0.339245	0.38525
KCMF1	56888	0.410871	0.359072	0.384972
PUS7	54517	0.410828	0.358454	0.384641
PHF10	55274	0.432993	0.335989	0.384491
RAD51	5888	0.391549	0.376898	0.384223
C11orf73	51501	0.367173	0.400955	0.384064
CTDSPL	10217	0.420327	0.347391	0.383859
KIAA1524	57650	0.318178	0.4495	0.383839
SLC35D2	11046	0.420868	0.345828	0.383348
ZBTB10	65986	0.730812	0.0358512	0.383332
SEC61B	10952	0.421586	0.344591	0.383089
HN1	51155	0.234508	0.531643	0.383076
IVNS1ABP	10625	0.415916	0.350166	0.383041
CCDC47	57003	0.283598	0.481717	0.382657
GMPPA	29926	0.517038	0.247965	0.382502
PHOSPHO2	493911	0.562954	0.20162	0.382287
B3GNT1	11041	0.363582	0.400746	0.382164
DAZAP2	9802	0.761838	0.00208858	0.381963
MARC2	54996	0.546909	0.21615	0.38153
ARL4D	379	0.207042	0.555702	0.381372
AGPAT5	55326	0.23915	0.523374	0.381262
HYI	81888	0.534592	0.227888	0.38124
NDUFAF7	55471	0.577533	0.184893	0.381213
ALDH18A1	5832	0.555002	0.206543	0.380773
LTB4R2	56413	0.439771	0.320673	0.380222
LARP7	51574	0.698384	0.0618046	0.380094
SYNJ2BP	55333	0.621672	0.137423	0.379548
MND1	84057	0.459447	0.299302	0.379374
UBE2J2	118424	0.536277	0.222422	0.37935
WARS	7453	0.253313	0.505384	0.379349
HIVEP2	3097	0.531571	0.226934	0.379252
PSMD5	5711	0.522972	0.235421	0.379197
CLPTM1L	81037	0.587952	0.170335	0.379144
AGFG1	3267	0.280169	0.477688	0.378928
UFSP2	55325	0.548175	0.209409	0.378792
RPL34	6164	0.739109	0.0184397	0.378775
TSR2	90121	0.307934	0.449475	0.378704
RPL23	9349	0.502837	0.253767	0.378302
NFKB2	4791	0.368035	0.387869	0.377952
RPS4X	6191	0.359044	0.396756	0.3779
FAM204A	63877	0.241155	0.514476	0.377815
RPS5	6193	0.615058	0.139938	0.377498
RNF19B	127544	0.354492	0.399533	0.377013
SLC20A2	6575	0.339023	0.414992	0.377008
DNAJA4	55466	0.417282	0.336462	0.376872
LDHB	3945	0.411683	0.341946	0.376814
LUZP1	7798	0.432804	0.320736	0.37677
TMEM80	283232	0.456607	0.295869	0.376238
TMEM185B	79134	0.287133	0.464016	0.375574
ATXN7L3B	552889	0.496644	0.254432	0.375538
CHPF	79586	0.369544	0.381332	0.375438
MELK	9833	0.219102	0.531708	0.375405
ST3GAL6	10402	0.52233	0.227937	0.375133
ZDBF2	57683	0.36832	0.381847	0.375084
CLCN3	1182	0.22109	0.52895	0.37502
TNPO2	30000	0.492521	0.257466	0.374994
FANCI	55215	0.229812	0.520164	0.374988
RPL10A	4736	0.630981	0.11891	0.374945
SEPT9	10801	0.545636	0.204037	0.374837
EIF3B	8662	0.697666	0.0510826	0.374374
HBEGF	1839	0.477298	0.270717	0.374008
CCDC84	338657	0.509225	0.238742	0.373984
TTC13	79573	0.423446	0.32439	0.373918
EPS8	2059	0.479125	0.268584	0.373855
TOMM6	100188893	0.456708	0.290985	0.373847
ZDHHC3	51304	0.443973	0.30306	0.373517
METTL12	751071	0.530066	0.216959	0.373512
EIF3F	8665	0.45487	0.291898	0.373384
TBC1D19	55296	0.146338	0.600268	0.373303
RALBP1	10928	0.350578	0.39563	0.373104
PROSER2	254427	0.502114	0.243982	0.373048
CAP1	10487	0.637238	0.108502	0.37287
SF3B1	23451	0.21146	0.534199	0.37283
SLC5A3	6526	0.225881	0.519302	0.372591
ZNF174	7727	0.550795	0.194357	0.372576
HOXC8	3224	0.439317	0.305265	0.372291
BTF3L4	91408	0.658458	0.0854042	0.371931
B3GALNT2	148789	0.666645	0.0770566	0.371851
FZD6	8323	0.522196	0.220618	0.371407
GABPA	2551	0.157958	0.583851	0.370904
ANAPC5	51433	0.562451	0.179167	0.370809
POLR3F	10621	0.284165	0.457431	0.370798
C4orf32	132720	0.678611	0.0626912	0.370651
PPP3CB	5532	0.404451	0.336781	0.370616
NUDT2	318	0.636444	0.104331	0.370388
UBE2D3	7323	0.368599	0.371963	0.370281
SREBF1	6720	0.439947	0.300492	0.37022
CTNNB1	1499	0.375433	0.364452	0.369943
MTFMT	123263	0.401227	0.338561	0.369894
C3orf62	375341	0.546085	0.19327	0.369678
GK5	256356	0.391856	0.347439	0.369648
NUDC	10726	0.323647	0.415469	0.369558
C2orf49	79074	0.58478	0.153885	0.369332
TRAP1	10131	0.529547	0.20785	0.368698
SMARCA5	8467	0.562231	0.175028	0.368629
FBL	2091	0.49297	0.244047	0.368509
PTBP1	5725	0.395388	0.341284	0.368336
PRKRA	8575	0.408071	0.327899	0.367985
C8orf37	157657	0.312222	0.423244	0.367733
GNG10	2790	0.389588	0.34535	0.367469
NUDT12	83594	0.328459	0.406305	0.367382
LYZ	4069	0.44497	0.288778	0.366874
HDHD2	84064	0.465674	0.268027	0.366851
INO80C	125476	0.437127	0.296005	0.366566
JAG1	182	0.436846	0.296106	0.366476
FOXC1	2296	0.359462	0.373402	0.366432
SUV39H2	79723	0.226995	0.505655	0.366325
HSD17B12	51144	0.27527	0.457167	0.366219
ZNF552	79818	0.263428	0.468736	0.366082
UBN2	254048	0.491211	0.240885	0.366048
RRH	10692	0.48407	0.246933	0.365502
ZNF589	51385	0.402586	0.326613	0.364599
S100PBP	64766	0.686465	0.0403818	0.363424
BTG3	10950	0.38515	0.341606	0.363378
C5orf51	285636	0.52277	0.203368	0.363069
CCNI	10983	0.546738	0.178754	0.362746
ALDH1B1	219	0.515322	0.20976	0.362541
HDDC2	51020	0.681249	0.0436618	0.362455
PABPC1L	80336	0.500538	0.224061	0.3623
KLF3	51274	0.41754	0.306359	0.36195
UBN1	29855	0.275273	0.448293	0.361783
NOC3L	64318	0.21181	0.511723	0.361766
BORA	79866	0.0259089	0.697562	0.361736
GUK1	2987	0.523455	0.199899	0.361677
TMCO3	55002	0.430464	0.292858	0.361661
DPY30	84661	0.601594	0.121229	0.361412
LMBR1	64327	0.471581	0.250976	0.361278
ZNF451	26036	0.458348	0.26336	0.360854
UBFD1	56061	0.627644	0.0936634	0.360654
ACAT1	38	0.393565	0.327683	0.360624
NDUFS5	4725	0.527813	0.193328	0.36057
ARF1	375	0.685361	0.0352915	0.360326
RTTN	25914	0.270744	0.449541	0.360142
FAM162A	26355	0.423675	0.296082	0.359878
ZBED4	9889	0.302884	0.416776	0.35983
SPCS2	9789	0.505064	0.214359	0.359712
CRK	1398	0.485415	0.233465	0.35944
PNMA1	9240	0.602696	0.116104	0.3594
VCAN	1462	0.356599	0.361978	0.359288
NEIL3	55247	0.194939	0.523129	0.359034
RBMX	27316	0.395166	0.322283	0.358725
PTP4A2	8073	0.502088	0.214927	0.358508
PPP4R1	9989	0.498673	0.217701	0.358187
FOPNL	123811	0.334325	0.381573	0.357949
SPRED1	161742	0.273128	0.442746	0.357937
NPC1	4864	0.545511	0.170242	0.357876
PDHB	5162	0.358604	0.356666	0.357635
RPA4	29935	0.419502	0.295581	0.357541
S100A11	6282	0.433313	0.280137	0.356725
PLEKHG6	55200	0.646629	0.0660399	0.356334
PPP1R21	129285	0.430177	0.282402	0.356289
SNX11	29916	0.37957	0.331158	0.355364
ME2	4200	0.300964	0.409367	0.355165
CHD8	57680	0.358403	0.351883	0.355143
DENND5A	23258	0.389585	0.320682	0.355134
MORF4L1	10933	0.707308	0.00257328	0.354941
ITGB5	3693	0.4179	0.291894	0.354897
SEC23B	10483	0.370709	0.338931	0.35482
MED31	51003	0.0766571	0.63218	0.354418
LETMD1	25875	0.479001	0.229776	0.354388
ANAPC7	51434	0.453441	0.25514	0.354291
ADSS	159	0.506096	0.202419	0.354257
GLMN	11146	0.405518	0.302944	0.354231
RPRD1B	58490	0.495039	0.213351	0.354195
PHRF1	57661	0.461609	0.24638	0.353994
CASP2	835	0.470234	0.237585	0.35391
TRIM65	201292	0.39619	0.311412	0.353801
SLC35A3	23443	0.404003	0.303375	0.353689
KLHL42	57542	0.398555	0.308742	0.353649
ZDHHC5	25921	0.468627	0.238281	0.353454
CHD2	1106	0.397243	0.309106	0.353175
TM9SF1	10548	0.324357	0.381955	0.353156
PSMD7	5713	0.558052	0.147403	0.352728
NPLOC4	55666	0.449619	0.255526	0.352573
TMEM194A	23306	0.121854	0.583048	0.352451
MSS51	118490	0.481736	0.222435	0.352086
C1RL	51279	0.403689	0.300351	0.35202
TWSG1	57045	0.168054	0.535815	0.351934
GGA3	23163	0.588517	0.115324	0.351921
VDAC3	7419	0.285082	0.418589	0.351836
ACADM	34	0.451317	0.251592	0.351454
SDHAF2	54949	0.498079	0.203055	0.350567
SCO1	6341	0.381964	0.319114	0.350539
UQCRB	7381	0.283572	0.417428	0.3505
GAN	8139	0.351935	0.348648	0.350291
CMTM6	54918	0.233736	0.466788	0.350262
NOP9	161424	0.365056	0.335134	0.350095
DR1	1810	0.188533	0.511533	0.350033
SRP68	6730	0.408007	0.291813	0.34991
PPP6R3	55291	0.330995	0.368824	0.349909
GTF3A	2971	0.698766	0.000926887	0.349846
H2AFV	94239	0.603154	0.0964906	0.349822
DDX55	57696	0.581412	0.118195	0.349804
PRKACB	5567	0.335251	0.36398	0.349616
VBP1	7411	0.526288	0.172833	0.34956
LONP1	9361	0.491835	0.206183	0.349009
C8orf44	56260	0.544743	0.152137	0.34844
NDUFAF5	79133	0.570139	0.126036	0.348087
WDYHV1	55093	0.438883	0.257103	0.347993
NUP88	4927	0.463999	0.231924	0.347961
LBR	3930	0.0110982	0.684681	0.34789
JMJD7	100137047	0.526016	0.169646	0.347831
EIF3L	51386	0.256345	0.438952	0.347649
BMI1	648	0.259143	0.435589	0.347366
LRRC58	116064	0.194394	0.500263	0.347328
ATP5L	10632	0.342484	0.351915	0.3472
ANLN	54443	0.300534	0.393739	0.347137
C15orf40	123207	0.582643	0.111292	0.346968
CLCF1	23529	0.2188	0.475077	0.346938
BAG4	9530	0.393013	0.300623	0.346818
PPARG	5468	0.156811	0.53664	0.346725
PAM16	51025	0.528939	0.164157	0.346548
MYL12A	10627	0.630398	0.062105	0.346252
ZNF195	7748	0.394908	0.297144	0.346026
HNRNPDL	9987	0.355394	0.336584	0.345989
IDH3A	3419	0.0760147	0.615949	0.345982
PNP	4860	0.485488	0.206312	0.3459
UQCC2	84300	0.225936	0.465824	0.34588
LATS1	9113	0.253695	0.437896	0.345796
DYNLL2	140735	0.454346	0.236977	0.345661
FOXO1	2308	0.48681	0.203952	0.345381
SPIN4	139886	0.674555	0.015934	0.345244
APTX	54840	0.586281	0.104146	0.345213
METTL2B	55798	0.347824	0.341973	0.344898
SSX2IP	117178	0.362966	0.326797	0.344882
KIAA0232	9778	0.258125	0.431546	0.344835
PSD3	23362	0.393894	0.295619	0.344757
POLR1B	84172	0.415099	0.274379	0.344739
YTHDF2	51441	0.477686	0.211786	0.344736
TCERG1	10915	0.0848636	0.604361	0.344612
CEP44	80817	0.348495	0.340432	0.344463
APLP2	334	0.405728	0.282884	0.344306
IPO7	10527	0.0393808	0.649129	0.344255
VAMP2	6844	0.415983	0.272161	0.344072
MKKS	8195	0.331417	0.35636	0.343888
SERPINE2	5270	0.402331	0.285301	0.343816
KNTC1	9735	0.390474	0.297138	0.343806
ZNF133	7692	0.487568	0.199332	0.34345
CELF1	10658	0.393126	0.293566	0.343346
PHLDB2	90102	0.223805	0.462775	0.34329
THAP1	55145	0.259823	0.426446	0.343134
FCF1	51077	0.231105	0.454027	0.342566
TACC3	10460	0.392376	0.292208	0.342292
MYO1E	4643	0.440624	0.243328	0.341976
GRPEL1	80273	0.323641	0.360231	0.341936
MGME1	92667	0.311662	0.371901	0.341781
LARS	51520	0.402889	0.280588	0.341738
ERI1	90459	0.45143	0.23185	0.34164
NXN	64359	0.394612	0.288327	0.341469
FAM208A	23272	0.313961	0.368956	0.341458
C4orf27	54969	0.413991	0.268778	0.341385
ANKZF1	55139	0.675783	0.00665624	0.341219
METTL4	64863	0.191246	0.490632	0.340939
LIMS1	3987	0.356584	0.325113	0.340849
DHX15	1665	0.277127	0.40413	0.340629
KAT8	84148	0.665306	0.0159483	0.340627
POLA1	5422	0.324456	0.356774	0.340615
METTL14	57721	0.164189	0.516509	0.340349
CYP24A1	1591	0.603595	0.0770757	0.340335
NMNAT1	64802	0.455858	0.224783	0.34032
WIPF2	147179	0.53706	0.143258	0.340159
DEXI	28955	0.360718	0.319525	0.340122
LYSMD1	388695	0.111545	0.568093	0.339819
CNNM2	54805	0.446705	0.232927	0.339816
RBPJ	3516	0.173119	0.506451	0.339785
PDIA3	2923	0.465087	0.214472	0.339779
CTSB	1508	0.442818	0.236513	0.339666
BLZF1	8548	0.272433	0.406737	0.339585
ZDHHC23	254887	0.472193	0.205915	0.339054
RFFL	117584	0.262308	0.415443	0.338875
TMEM128	85013	0.159354	0.518334	0.338844
WRN	7486	0.263315	0.41433	0.338822
CCNG1	900	0.57598	0.101168	0.338574
FOXJ2	55810	0.493067	0.183491	0.338279
NIPA2	81614	0.38614	0.290342	0.338241
PRPSAP1	5635	0.140751	0.535605	0.338178
IMP4	92856	0.354891	0.321451	0.338171
RIPK2	8767	0.321331	0.354808	0.338069
C10orf113	387638	0.194552	0.481194	0.337873
SEC23IP	11196	0.358103	0.31754	0.337822
C18orf32	497661	0.317943	0.357473	0.337708
NABP1	64859	0.236427	0.438985	0.337706
SDAD1	55153	0.48919	0.185992	0.337591
EFR3A	23167	0.372906	0.30221	0.337558
SP140L	93349	0.351272	0.323417	0.337344
MAGOH	4116	0.112096	0.562282	0.337189
CEP192	55125	0.460337	0.213714	0.337026
ZHX2	22882	0.522034	0.151948	0.336991
BLCAP	10904	0.435069	0.238865	0.336967
FBXO31	79791	0.4845	0.189331	0.336916
SPICE1	152185	0.447264	0.226202	0.336733
KMT2D	8085	0.559327	0.113953	0.33664
TVP23C	201158	0.0324641	0.640719	0.336592
DNAH14	127602	0.218037	0.454989	0.336513
NUP205	23165	0.420918	0.251935	0.336427
LIMA1	51474	0.415545	0.257027	0.336286
CRLS1	54675	0.444715	0.22759	0.336152
ABCD4	5826	0.51724	0.154825	0.336033
DCTN2	10540	0.403211	0.268358	0.335784
BTN3A1	11119	0.486251	0.185227	0.335739
OPN3	23596	0.183416	0.487539	0.335478
NR4A2	4929	0.283656	0.38728	0.335468
CHST15	51363	0.410847	0.26001	0.335428
UQCRC1	7384	0.318075	0.352625	0.33535
ZCCHC8	55596	0.315501	0.353372	0.334437
SLK	9748	0.079808	0.589063	0.334436
CHCHD7	79145	0.474663	0.193821	0.334242
LRIG2	9860	0.526272	0.142099	0.334186
DHRS7B	25979	0.418687	0.249353	0.33402
URB1	9875	0.497441	0.170573	0.334007
CARKD	55739	0.545622	0.121872	0.333747
STARD4	134429	0.586467	0.0810052	0.333736
PDS5A	23244	0.266345	0.400721	0.333533
IST1	9798	0.385288	0.281728	0.333508
SP3	6670	0.329245	0.337673	0.333459
COPS2	9318	0.221284	0.445529	0.333406
C8orf59	401466	0.659509	0.0068687	0.333189
TIAM1	7074	0.469241	0.196844	0.333042
SEC31B	25956	0.583036	0.08302	0.333028
GABARAPL2	11345	0.0882193	0.577171	0.332695
TPST2	8459	0.512531	0.152751	0.332641
RPUSD4	84881	0.264632	0.400482	0.332557
SH2D4A	63898	0.331987	0.332784	0.332386
TRIB3	57761	0.61654	0.0481529	0.332347
PDCD5	9141	0.501466	0.162997	0.332232
ABHD13	84945	0.423856	0.240106	0.331981
GLUD1	2746	0.124579	0.539096	0.331838
ATP5S	27109	0.0814328	0.581743	0.331588
MCM8	84515	0.406591	0.256562	0.331577
PGAM5	192111	0.356387	0.306753	0.33157
HAUS6	54801	0.529125	0.133925	0.331525
ODF2L	57489	0.311914	0.350912	0.331413
COPG1	22820	0.421479	0.241273	0.331376
AGPS	8540	0.199506	0.463135	0.331321
CYB5R1	51706	0.522694	0.139753	0.331223
STAMBPL1	57559	0.499426	0.163016	0.331221
RPL18A	6142	0.434864	0.227008	0.330936
IMPA1	3612	0.653044	0.0083153	0.33068
ZNRF3	84133	0.407273	0.252914	0.330094
CAT	847	0.586038	0.0739761	0.330007
CDC42SE1	56882	0.616486	0.0433001	0.329893
C17orf85	55421	0.404198	0.255181	0.32969
FAM222B	55731	0.476253	0.18294	0.329596
FBXO46	23403	0.57451	0.0835791	0.329045
TPX2	22974	0.249394	0.408601	0.328997
PDLIM3	27295	0.496747	0.161172	0.328959
MED4	29079	0.335906	0.321482	0.328694
CSTF1	1477	0.440729	0.216587	0.328658
PFN2	5217	0.442085	0.215116	0.3286
AMD1	262	0.288379	0.368482	0.328431
LRRC57	255252	0.652877	0.00251288	0.327695
CDC42	998	0.328301	0.327076	0.327689
TMEM97	27346	0.411768	0.243036	0.327402
EIF4H	7458	0.355319	0.299441	0.32738
M6PR	4074	0.609858	0.0448983	0.327378
ANP32A	8125	0.405218	0.24923	0.327224
IARS2	55699	0.227857	0.426346	0.327101
CEP78	84131	0.273777	0.380372	0.327075
ASAP2	8853	0.307762	0.346305	0.327034
NSUN2	54888	0.58975	0.0641662	0.326958
PPIL1	51645	0.371514	0.281837	0.326675
NPTN	27020	0.628943	0.0240922	0.326518
EIF6	3692	0.593548	0.0593241	0.326436
AGPAT9	84803	0.308342	0.344209	0.326275
TCP11L1	55346	0.482312	0.170149	0.32623
NAB2	4665	0.154974	0.497263	0.326119
FAM63B	54629	0.498076	0.153534	0.325805
NR2C1	7181	0.386283	0.265115	0.325699
FAM122C	159091	0.364077	0.287243	0.32566
GPBP1L1	60313	0.330249	0.320993	0.325621
ZNF586	54807	0.322371	0.328735	0.325553
RAB6A	5870	0.342841	0.307822	0.325332
TNNI3	7137	0.449637	0.200943	0.32529
ZNF395	55893	0.645198	0.00510815	0.325153
VPS13A	23230	0.258745	0.39154	0.325142
HARS2	23438	0.460134	0.190043	0.325088
CUL3	8452	0.461868	0.187539	0.324704
MTHFS	10588	0.382161	0.267013	0.324587
GSTO1	9446	0.260899	0.388121	0.32451
SRSF4	6429	0.37678	0.272172	0.324476
CDC42SE2	56990	0.33398	0.314684	0.324332
SMG7	9887	0.351263	0.29674	0.324001
PCDH7	5099	0.175328	0.472407	0.323867
TOX2	84969	0.41535	0.232283	0.323817
DPH5	51611	0.0109422	0.636483	0.323713
METTL1	4234	0.429178	0.218245	0.323712
TMEM91	641649	0.503272	0.144066	0.323669
BRCA1	672	0.316696	0.330566	0.323631
CDC5L	988	0.389983	0.257064	0.323524
MRPL46	26589	0.488134	0.158557	0.323346
MRPS33	51650	0.236821	0.409856	0.323339
GINS1	9837	0.268104	0.377789	0.322946
TICRR	90381	0.165522	0.480187	0.322854
ETF1	2107	0.613723	0.0313176	0.32252
VWDE	221806	0.386115	0.258699	0.322407
FKBP3	2287	0.203607	0.440785	0.322196
SEC22A	26984	0.288689	0.35537	0.322029
FOXRED1	55572	0.43505	0.208571	0.321811
CSNK1D	1453	0.491511	0.151754	0.321632
PLD6	201164	0.165117	0.478059	0.321588
NDUFB1	4707	0.511259	0.131642	0.321451
TIMM8B	26521	0.18275	0.460068	0.321409
PCBP2	5094	0.382614	0.259958	0.321286
FANCB	2187	0.249565	0.39209	0.320828
FBXW4	6468	0.260203	0.381395	0.320799
DBP	1628	0.437612	0.203793	0.320703
TTC3	7267	0.458646	0.182697	0.320672
EEF1G	1937	0.504213	0.137072	0.320642
TMEM41A	90407	0.49345	0.147476	0.320463
KIFC3	3801	0.323912	0.316969	0.320441
TMEM258	746	0.470266	0.17061	0.320438
LMAN2	10960	0.143731	0.496989	0.32036
PIGV	55650	0.484376	0.155982	0.320179
ARF4	378	0.561958	0.077629	0.319793
FTSJ1	24140	0.633029	0.0064948	0.319762
SYMPK	8189	0.473982	0.164949	0.319466
ZNF623	9831	0.45981	0.179026	0.319418
HIF1AN	55662	0.503106	0.135639	0.319372
NXT2	55916	0.188664	0.449989	0.319326
ZBTB21	49854	0.335278	0.302841	0.31906
GBA2	57704	0.508651	0.12892	0.318785
GANAB	23193	0.38938	0.247715	0.318547
CNN3	1266	0.513413	0.123521	0.318467
DEDD2	162989	0.32231	0.314511	0.31841
RNF2	6045	0.48332	0.153329	0.318324
C5orf55	116349	0.190949	0.445639	0.318294
MIDN	90007	0.297283	0.33882	0.318052
TAF2	6873	0.280628	0.355005	0.317817
SUDS3	64426	0.446421	0.189152	0.317786
PHGDH	26227	0.474706	0.160678	0.317692
UNC50	25972	0.512354	0.122661	0.317508
RNASEH2B	79621	0.498497	0.136271	0.317384
TRAK1	22906	0.334064	0.300463	0.317264
MBP	4155	0.408345	0.225963	0.317154
SUPV3L1	6832	0.631033	0.00271798	0.316875
SPATA33	124045	0.251156	0.382593	0.316874
APPL1	26060	0.186428	0.44718	0.316804
AGK	55750	0.180107	0.453159	0.316633
FXR2	9513	0.538364	0.0948459	0.316605
PLEK2	26499	0.373937	0.258821	0.316379
NCAPD3	23310	0.290089	0.342217	0.316153
QSOX2	169714	0.279286	0.35302	0.316153
QSER1	79832	0.306769	0.325434	0.316101
TGFBR1	7046	0.389383	0.242809	0.316096
RB1CC1	9821	0.23975	0.392167	0.315958
MARK3	4140	0.441679	0.18984	0.31576
BCL2L2	599	0.536836	0.0944617	0.315649
SRP72	6731	0.281029	0.349975	0.315502
VCP	7415	0.430171	0.200012	0.315092
ZFC3H1	196441	0.271786	0.358129	0.314957
SRRT	51593	0.352806	0.277067	0.314936
P4HA1	5033	0.406477	0.22249	0.314483
DDX21	9188	0.27995	0.348601	0.314275
ZNF519	162655	0.342233	0.286104	0.314168
SMCHD1	23347	0.0236942	0.604512	0.314103
ZNF75D	7626	0.18924	0.438955	0.314098
C1orf74	148304	0.338385	0.289743	0.314064
SNX9	51429	0.235395	0.392609	0.314002
INO80	54617	0.384303	0.243699	0.314001
TFRC	7037	0.379418	0.248145	0.313781
HOXA7	3204	0.475334	0.151707	0.31352
MSX1	4487	0.329295	0.297282	0.313289
MTRNR2L8	100463486	0.546626	0.0797878	0.313207
WDR45B	56270	0.36974	0.256103	0.312922
NDUFA8	4702	0.313366	0.312457	0.312912
INTS7	25896	0.483377	0.142297	0.312837
C9orf41	138199	0.2773	0.347793	0.312547
NDUFV1	4723	0.236541	0.388504	0.312523
TIMM22	29928	0.146615	0.477615	0.312115
SLC1A5	6510	0.543364	0.0803265	0.311845
MZF1	7593	0.345464	0.278133	0.311798
JADE1	79960	0.371357	0.252128	0.311742
ARHGEF12	23365	0.37981	0.243359	0.311584
AGA	175	0.367613	0.254653	0.311133
SLC10A4	201780	0.0891486	0.532986	0.311067
COX15	1355	0.382498	0.239254	0.310876
PSORS1C1	170679	0.460519	0.160198	0.310358
C2orf43	60526	0.254035	0.366408	0.310221
ZNF264	9422	0.22674	0.393682	0.310211
FAM135A	57579	0.07876	0.541457	0.310109
TAF4B	6875	0.369063	0.250126	0.309595
SHC1	6464	0.346534	0.272634	0.309584
ADNP2	22850	0.559775	0.0593309	0.309553
TRAF6	7189	0.253066	0.366029	0.309548
BICD1	636	0.24088	0.378165	0.309522
RPS14	6208	0.402659	0.216305	0.309482
RPS26	6231	0.494092	0.124589	0.309341
NEU3	10825	0.413283	0.205154	0.309219
GGCX	2677	0.461353	0.156846	0.3091
LAMB3	3914	0.351103	0.2669	0.309002
FAM160B1	57700	0.485524	0.132302	0.308913
RBM8A	9939	0.299963	0.317761	0.308862
SLC25A27	9481	0.314073	0.303606	0.308839
C12orf57	113246	0.180402	0.437034	0.308718
SRP14	6727	0.172434	0.444604	0.308519
MAP4K4	9448	0.381195	0.235631	0.308413
POFUT1	23509	0.269706	0.346938	0.308322
SCMH1	22955	0.189661	0.426592	0.308127
NAT9	26151	0.370231	0.245914	0.308072
ATP5G3	518	0.124139	0.491835	0.307987
DDHD2	23259	0.405528	0.210153	0.30784
RSAD1	55316	0.454405	0.161189	0.307797
DPF2	5977	0.306733	0.308845	0.307789
FGF19	9965	0.322686	0.29201	0.307348
EXT1	2131	0.346335	0.268361	0.307348
COTL1	23406	0.380358	0.234208	0.307283
LSM14A	26065	0.242794	0.371233	0.307014
PAK1	5058	0.372918	0.241095	0.307007
JPH1	56704	0.446711	0.167185	0.306948
ASAH1	427	0.3433	0.270384	0.306842
VMA21	203547	0.280781	0.33278	0.30678
ACIN1	22985	0.487995	0.125356	0.306676
ATP2C1	27032	0.342378	0.270533	0.306456
STK24	8428	0.294036	0.318622	0.306329
EVA1C	59271	0.417425	0.194217	0.305821
HSPA14	51182	0.401865	0.20972	0.305793
ATF4	468	0.328804	0.282598	0.305701
NSL1	25936	0.323767	0.287584	0.305676
TIMP2	7077	0.412163	0.198915	0.305539
CUEDC1	404093	0.331105	0.279787	0.305446
MRPL42	28977	0.57716	0.0336632	0.305412
RSL24D1	51187	0.277458	0.333173	0.305315
F11R	50848	0.283365	0.327036	0.305201
AKAP5	9495	0.429316	0.181073	0.305195
BRD8	10902	0.358871	0.250971	0.304921
TBC1D20	128637	0.55229	0.0569084	0.304599
RPL27	6155	0.347419	0.261571	0.304495
ZC3H12C	85463	0.0667594	0.542153	0.304456
ERO1LB	56605	0.356182	0.252668	0.304425
DHX9	1660	0.509092	0.0997019	0.304397
TMBIM4	51643	0.025647	0.583103	0.304375
CTAGE1	64693	0.128044	0.480598	0.304321
RPS6KA5	9252	0.275167	0.33324	0.304203
MRTO4	51154	0.455518	0.152863	0.30419
SMU1	55234	0.465638	0.142673	0.304155
EIF2AK2	5610	0.434095	0.174179	0.304137
C1orf63	57035	0.308097	0.299804	0.30395
API5	8539	0.349493	0.25812	0.303807
ARAP2	116984	0.204199	0.402405	0.303302
C16orf74	404550	0.371085	0.234713	0.302899
THRAP3	9967	0.575218	0.0305173	0.302868
WDR12	55759	0.46465	0.140608	0.302629
SRPR	6734	0.385402	0.219399	0.3024
MAP2K4	6416	0.323883	0.280717	0.3023
HHEX	3087	0.471101	0.133165	0.302133
LRRC69	100130742	0.257357	0.346862	0.30211
CBX5	23468	0.305193	0.298734	0.301964
RPF1	80135	0.405636	0.197939	0.301787
NOL7	51406	0.460861	0.142626	0.301744
UBE2D1	7321	0.451012	0.15149	0.301251
NKTR	4820	0.439001	0.162651	0.300826
KANSL1	284058	0.321694	0.279133	0.300413
LAMC1	3915	0.0208999	0.579818	0.300359
TTC14	151613	0.21522	0.385253	0.300237
CPSF2	53981	0.275117	0.325336	0.300226
VPS36	51028	0.549756	0.0501798	0.299968
CENPJ	55835	0.388593	0.211193	0.299893
XPO5	57510	0.456918	0.142852	0.299885
PALD1	27143	0.375671	0.223715	0.299693
SLC12A8	84561	0.415314	0.183796	0.299555
KIF2A	3796	0.313148	0.285952	0.29955
BRCC3	79184	0.237678	0.360923	0.299301
GTSF1	121355	0.465841	0.13271	0.299275
CKS1B	1163	0.352751	0.245609	0.29918
PTMA	5757	0.341951	0.256172	0.299061
ABL1	25	0.476275	0.121603	0.298939
CNOT1	23019	0.573867	0.0238496	0.298858
DLGAP5	9787	0.258698	0.338938	0.298818
EXTL3	2137	0.371814	0.225668	0.298741
FMNL2	114793	0.21882	0.378331	0.298575
MRPS11	64963	0.343814	0.253251	0.298533
TNFRSF1A	7132	0.37054	0.226434	0.298487
RNF10	9921	0.419115	0.177796	0.298455
PPP3R1	5534	0.292726	0.304041	0.298384
UBE2I	7329	0.557311	0.0394452	0.298378
THAP7	80764	0.268111	0.328239	0.298175
UBE2C	11065	0.206164	0.390048	0.298106
TFB2M	64216	0.568098	0.0279012	0.298
UBB	7314	0.352184	0.243774	0.297979
BRK1	55845	0.257473	0.338428	0.297951
CRKL	1399	0.434109	0.161768	0.297939
TMEM125	128218	0.397978	0.197258	0.297618
CNOT6	57472	0.538564	0.0566713	0.297617
CEBPG	1054	0.477136	0.117356	0.297246
ODC1	4953	0.357773	0.23669	0.297232
HNRNPD	3184	0.098729	0.495525	0.297127
RFC1	5981	0.327733	0.266382	0.297058
RNASEK	440400	0.441642	0.152377	0.29701
PLK3	1263	0.408621	0.185318	0.296969
KIAA1551	55196	0.588035	0.00557621	0.296806
NOLC1	9221	0.291091	0.302038	0.296564
CYP2S1	29785	0.366588	0.226419	0.296503
GNPDA2	132789	0.294527	0.298382	0.296454
UBE2G1	7326	0.497277	0.0950964	0.296187
SLC30A9	10463	0.218574	0.373796	0.296185
KRBOX4	55634	0.270079	0.322159	0.296119
ZNF7	7553	0.388056	0.204101	0.296079
SRP9	6726	0.106427	0.484882	0.295654
MAP4	4134	0.311785	0.27929	0.295537
PSMF1	9491	0.240985	0.350082	0.295533
PNRC1	10957	0.00235121	0.588287	0.295319
GNB1	2782	0.133863	0.456731	0.295297
SERTAD3	29946	0.0763367	0.514135	0.295236
BLOC1S4	55330	0.351129	0.239316	0.295222
SYNJ2	8871	0.365086	0.225301	0.295194
WRNIP1	56897	0.331824	0.258561	0.295193
GRIPAP1	56850	0.503451	0.0866189	0.295035
PPP1CC	5501	0.0559075	0.533907	0.294907
PAM	5066	0.255915	0.333617	0.294766
DHDDS	79947	0.370652	0.218803	0.294728
ZFP36L2	678	0.19561	0.393673	0.294642
LIPT2	387787	0.144203	0.444919	0.294561
POP7	10248	0.506063	0.0829282	0.294495
KDSR	2531	0.12181	0.467146	0.294478
ZNF74	7625	0.549789	0.0391512	0.29447
THAP5	168451	0.362184	0.226647	0.294416
SLC35G5	83650	0.272505	0.316073	0.294289
STRIP2	57464	0.0556278	0.532709	0.294169
C11orf58	10944	0.529815	0.058238	0.294027
COPB2	9276	0.533584	0.0543305	0.293957
ACP6	51205	0.432656	0.154392	0.293524
FLYWCH2	114984	0.488849	0.0981319	0.293491
NDUFB4	4710	0.494376	0.0925431	0.293459
DNAJA3	9093	0.423959	0.162852	0.293406
ITGB3BP	23421	0.30989	0.276895	0.293393
CISD2	493856	0.219087	0.367626	0.293357
ZKSCAN1	7586	0.557566	0.0289825	0.293274
SEMA7A	8482	0.421927	0.164547	0.293237
MRPS35	60488	0.358247	0.228157	0.293202
MTURN	222166	0.514103	0.0721903	0.293147
SMIM3	85027	0.379715	0.206427	0.293071
CALU	813	0.290017	0.296054	0.293036
DCBLD1	285761	0.290237	0.295827	0.293032
ZNF114	163071	0.289411	0.296507	0.292959
UBE2E1	7324	0.383923	0.201994	0.292958
KHSRP	8570	0.287908	0.297643	0.292776
TERF2IP	54386	0.57573	0.00960912	0.29267
TNFRSF18	8784	0.363781	0.221303	0.292542
F2RL1	2150	0.265994	0.319024	0.292509
NUDT21	11051	0.310901	0.273897	0.292399
SLC15A4	121260	0.354497	0.230301	0.292399
BFAR	51283	0.374805	0.209867	0.292336
PPIB	5479	0.339066	0.245582	0.292324
TSEN2	80746	0.430788	0.153854	0.292321
SOCS5	9655	0.444388	0.139846	0.292117
CHCHD1	118487	0.188777	0.395381	0.292079
ATP5A1	498	0.324158	0.259882	0.29202
FBXO34	55030	0.225514	0.358299	0.291907
BCL2L13	23786	0.363431	0.220223	0.291827
DMTF1	9988	0.413027	0.170028	0.291528
NDUFV2	4729	0.215705	0.36724	0.291473
TUBB6	84617	0.407469	0.175469	0.291469
FKBP8	23770	0.47364	0.109031	0.291335
NIPA1	123606	0.374201	0.208451	0.291326
ZNF160	90338	0.28235	0.300071	0.291211
C10orf35	219738	0.328824	0.253462	0.291143
PAQR3	152559	0.344887	0.237222	0.291054
CCRN4L	25819	0.392396	0.189696	0.291046
PPM1B	5495	0.392287	0.189344	0.290816
BLVRB	645	0.40498	0.176513	0.290746
USP47	55031	0.376338	0.204918	0.290628
SEC24B	10427	0.297881	0.283014	0.290447
GOLGA3	2802	0.399684	0.181047	0.290366
EXOSC6	118460	0.258692	0.321725	0.290209
MYO19	80179	0.27517	0.305198	0.290184
NDUFS6	4726	0.3871	0.193203	0.290152
ZNF354A	6940	0.245495	0.334699	0.290097
AIDA	64853	0.348013	0.231697	0.289855
INTS3	65123	0.507625	0.0713846	0.289505
C7orf73	647087	0.47906	0.0999378	0.289499
MLH3	27030	0.342129	0.236846	0.289487
PNPO	55163	0.430653	0.14828	0.289466
BIVM	54841	0.339796	0.238965	0.28938
GOSR1	9527	0.262367	0.316378	0.289373
ZNF181	339318	0.148493	0.430241	0.289367
TMEM208	29100	0.570063	0.00837229	0.289217
CCDC146	57639	0.357782	0.220616	0.289199
DEDD	9191	0.385461	0.192822	0.289142
DDX1	1653	0.192117	0.385941	0.289029
CEP120	153241	0.269383	0.308323	0.288853
ZFAND4	93550	0.30003	0.276787	0.288408
RHOA	387	0.333682	0.242303	0.287993
NEMF	9147	0.345406	0.230562	0.287984
PIK3R4	30849	0.296761	0.279161	0.287961
PUS1	80324	0.281442	0.294452	0.287947
AGTRAP	57085	0.497139	0.0785909	0.287865
NR2F1	7025	0.494977	0.080669	0.287823
MINPP1	9562	0.184036	0.391571	0.287803
B3GNT2	10678	0.243786	0.331471	0.287628
ZNF12	7559	0.245117	0.329574	0.287345
UBLCP1	134510	0.0473169	0.527143	0.28723
SMS	6611	0.43333	0.140964	0.287147
TBCA	6902	0.309481	0.26479	0.287135
CNTROB	116840	0.498951	0.0752799	0.287116
C14orf159	80017	0.3559	0.217766	0.286833
SNRPF	6636	0.502532	0.0710143	0.286773
CD63	967	0.314818	0.258548	0.286683
SNX25	83891	0.280555	0.29266	0.286607
TMEM67	91147	0.340452	0.232586	0.286519
NELFA	7469	0.450253	0.122769	0.286511
TRIOBP	11078	0.298338	0.274655	0.286497
TRAPPC4	51399	0.359508	0.213379	0.286444
ZNF577	84765	0.423038	0.149595	0.286316
ZNF202	7753	0.312148	0.260374	0.286261
FIP1L1	81608	0.289324	0.283164	0.286244
CENPT	80152	0.451548	0.119776	0.285662
USP34	9736	0.131288	0.439357	0.285323
AUH	549	0.256849	0.31357	0.285209
ADAR	103	0.475096	0.0950518	0.285074
EMC2	9694	0.0634802	0.506607	0.285044
IRF3	3661	0.336714	0.233356	0.285035
TNFRSF21	27242	0.3492	0.220487	0.284843
OLFM2	93145	0.335435	0.233663	0.284549
ABCE1	6059	0.152781	0.416274	0.284527
GPATCH2L	55668	0.462932	0.105845	0.284388
TBX3	6926	0.265927	0.302319	0.284123
CALM1	801	0.513711	0.0544616	0.284086
ECI2	10455	0.211168	0.35693	0.284049
EXOG	9941	0.288424	0.279546	0.283985
ZMYM6NB	100506144	0.356447	0.211317	0.283882
CSTF2	1478	0.235152	0.33247	0.283811
PRPF4	9128	0.441164	0.126262	0.283713
MTX1	4580	0.412429	0.154145	0.283287
SKA3	221150	0.282659	0.283681	0.28317
FERMT1	55612	0.0212613	0.545068	0.283165
C4orf3	401152	0.26187	0.304394	0.283132
GPR39	2863	0.22231	0.343809	0.28306
CIRH1A	84916	0.42718	0.138577	0.282879
RPL7	6129	0.142926	0.422771	0.282848
ZNF746	155061	0.250191	0.315398	0.282795
HDAC1	3065	0.364788	0.200536	0.282662
PLAC8L1	153770	0.221579	0.343684	0.282631
SAP30BP	29115	0.389772	0.175456	0.282614
CSRP1	1465	0.466418	0.0986411	0.28253
KIFC1	3833	0.354644	0.210363	0.282504
SRA1	10011	0.323244	0.24176	0.282502
NAA16	79612	0.388192	0.176268	0.28223
SS18L1	26039	0.405042	0.159344	0.282193
PGM1	5236	0.427509	0.136754	0.282131
ZMAT2	153527	0.230887	0.333157	0.282022
TBX18	9096	0.445803	0.117977	0.28189
CDC25C	995	0.192994	0.370659	0.281826
MRPS10	55173	0.534401	0.0291483	0.281775
GNAI1	2770	0.151891	0.411452	0.281672
MINA	84864	0.457442	0.105736	0.281589
SOX9	6662	0.29841	0.2646	0.281505
B3GNTL1	146712	0.412673	0.150168	0.281421
LMAN1	3998	0.22796	0.334507	0.281234
DGUOK	1716	0.437879	0.124567	0.281223
BTBD3	22903	0.335602	0.226678	0.28114
SFXN1	94081	0.220848	0.341424	0.281136
MKX	283078	0.138743	0.422839	0.280791
NCKIPSD	51517	0.335723	0.225673	0.280698
CDC7	8317	0.297928	0.263441	0.280685
EIF3E	3646	0.0108977	0.550354	0.280626
LSR	51599	0.445325	0.115904	0.280615
BRD9	65980	0.299325	0.261746	0.280535
DUS4L	11062	0.329887	0.23106	0.280474
RBM28	55131	0.229841	0.330947	0.280394
TNKS2	80351	0.312244	0.247716	0.27998
NUS1	116150	0.33164	0.227993	0.279817
BOD1L1	259282	0.463757	0.0956683	0.279712
POLE2	5427	0.290083	0.269259	0.279671
MDN1	23195	0.365643	0.193456	0.27955
GJC1	10052	0.457118	0.101775	0.279447
ALPK1	80216	0.231975	0.32684	0.279408
GBX1	2636	0.25995	0.298767	0.279359
RNPC3	55599	0.257809	0.30084	0.279325
ATP6AP1	537	0.328786	0.22942	0.279103
MAGED1	9500	0.256642	0.301523	0.279082
DDX59	83479	0.47088	0.0870437	0.278962
TDG	6996	0.288657	0.268669	0.278663
MRPS25	64432	0.548663	0.00846644	0.278565
BTBD7	55727	0.197911	0.359019	0.278465
ATL2	64225	0.328814	0.228113	0.278464
UGP2	7360	0.279385	0.277485	0.278435
MRPL55	128308	0.245649	0.311159	0.278404
TMEM69	51249	0.497263	0.0594567	0.27836
UBASH3B	84959	0.402603	0.153831	0.278217
CYP2R1	120227	0.447471	0.108886	0.278178
GAA	2548	0.325277	0.231079	0.278178
LRR1	122769	0.269066	0.287139	0.278103
POLR2K	5440	0.495301	0.0608485	0.278075
SRXN1	140809	0.401526	0.154482	0.278004
MTHFD1	4522	0.261721	0.294138	0.27793
CLSPN	63967	0.356961	0.198763	0.277862
ZNF548	147694	0.455728	0.0998285	0.277778
FAM101B	359845	0.372974	0.18236	0.277667
TERF2	7014	0.118142	0.437185	0.277664
AP1S2	8905	0.256035	0.298921	0.277478
NRD1	4898	0.2612	0.293418	0.277309
GALNS	2588	0.233783	0.320623	0.277203
KCNH3	23416	0.315224	0.239035	0.277129
EEF1B2	1933	0.221504	0.332383	0.276943
CLDN15	24146	0.416002	0.137865	0.276933
KIAA0040	9674	0.413527	0.140268	0.276897
RBBP5	5929	0.342842	0.21072	0.276781
FGFBP3	143282	0.399093	0.154166	0.276629
ACAD9	28976	0.350007	0.20322	0.276614
POP5	51367	0.338018	0.215099	0.276558
EFNB2	1948	0.333153	0.2192	0.276176
PTGR2	145482	0.474193	0.0778998	0.276046
DIEXF	27042	0.516404	0.0355606	0.275982
MED9	55090	0.450438	0.101446	0.275942
PSMC5	5705	0.350326	0.201555	0.275941
BCAR1	9564	0.309298	0.242571	0.275935
PDCD6	10016	0.251308	0.300163	0.275736
RBM3	5935	0.0754298	0.475775	0.275602
SAMD4B	55095	0.375181	0.17601	0.275595
ATP11A	23250	0.305725	0.245217	0.275471
AHCYL1	10768	0.159854	0.391035	0.275444
RRM1	6240	0.340275	0.209615	0.274945
RNF6	6049	0.456009	0.093547	0.274778
PI4K2A	55361	0.343949	0.205572	0.27476
TOMM20	9804	0.224058	0.325354	0.274706
YPEL5	51646	0.10155	0.447647	0.274599
IMPACT	55364	0.290095	0.259037	0.274566
ACACA	31	0.234547	0.313998	0.274273
MAP7	9053	0.403703	0.144836	0.274269
MAPRE1	22919	0.435011	0.113384	0.274198
TRMU	55687	0.323422	0.224531	0.273976
SART1	9092	0.467357	0.080532	0.273945
ADM	133	0.33126	0.216474	0.273867
EAF1	85403	0.519852	0.0275832	0.273717
TRUB1	142940	0.192061	0.355067	0.273564
LMO4	8543	0.447531	0.09935	0.27344
COASY	80347	0.29409	0.252611	0.27335
KANK1	23189	0.216554	0.330068	0.273311
HSP90B1	7184	0.1722	0.374368	0.273284
BCL9L	283149	0.375202	0.170906	0.273054
METTL21A	151194	0.471837	0.0740705	0.272954
SPIDR	23514	0.281767	0.264012	0.272889
GINM1	116254	0.0313329	0.514254	0.272793
GYLTL1B	120071	0.308574	0.236896	0.272735
YLPM1	56252	0.41728	0.128056	0.272668
CD320	51293	0.33723	0.208097	0.272663
CDK5RAP1	51654	0.304754	0.2402	0.272477
CLOCK	9575	0.0849648	0.459926	0.272445
MAP3K4	4216	0.269439	0.275177	0.272308
MTERFD1	51001	0.53662	0.00769432	0.272157
ANAPC16	119504	0.332239	0.211856	0.272047
DNAAF2	55172	0.387807	0.155719	0.271763
MIER1	57708	0.319423	0.223975	0.271699
TM2D2	83877	0.141624	0.401557	0.27159
ZFP1	162239	0.367675	0.175408	0.271541
HAT1	8520	0.292482	0.250467	0.271474
RBBP7	5931	0.328402	0.214034	0.271218
C7orf43	55262	0.375237	0.167168	0.271203
IWS1	55677	0.250621	0.29155	0.271086
ZNF670	93474	0.362967	0.17907	0.271018
TPM2	7169	0.257693	0.284205	0.270949
NOP14	8602	0.29189	0.249923	0.270906
ZFAND3	60685	0.255896	0.285077	0.270487
HN1L	90861	0.305106	0.2357	0.270403
TMEM50A	23585	0.342603	0.198079	0.270341
RUNX2	860	0.317042	0.223636	0.270339
COMMD8	54951	0.177439	0.36312	0.270279
MED29	55588	0.450621	0.0898362	0.270229
MED21	9412	0.176265	0.364163	0.270214
ELK3	2004	0.343769	0.196636	0.270202
SNRPB	6628	0.195013	0.345074	0.270044
EML6	400954	0.292773	0.247284	0.270028
FOXK1	221937	0.264907	0.275064	0.269985
FAM92A1	137392	0.13255	0.40683	0.26969
PAPD7	11044	0.438927	0.0999878	0.269458
FBXO42	54455	0.20259	0.336252	0.269421
DKK1	22943	0.4476	0.0911052	0.269353
SGPL1	8879	0.178171	0.360531	0.269351
WNT9A	7483	0.491213	0.047276	0.269244
CDRT4	284040	0.490964	0.0470879	0.269026
METTL21B	25895	0.21987	0.31812	0.268995
ZFYVE16	9765	0.0789014	0.459072	0.268987
LRRC8B	23507	0.246974	0.290664	0.268819
[truncated: 7,104 more rows]

## Sheet: S1B.RNA-Seq
Gene_Symbol	Entre_Gene_ID	Log2_Fold_Change_HCT116	Log2_Fold_Change_MCF7	Log2_Fold_Change_Average
CAV1	857	1.41085	3.89826	2.65455
TMEM106C	79022	0.48358	4.2891	2.38634
MORF4L2	9643	0.163205	4.41649	2.28985
FAM111B	374393	0.254227	3.60435	1.92929
HNRNPR	10236	0.0504039	3.79868	1.92454
AK2	204	3.28947	0.531208	1.91034
C10orf2	56652	1.72956	2.04602	1.88779
RRM2	6241	0.304281	3.4039	1.85409
CCNE2	9134	0.195965	3.47418	1.83507
ZNF367	195828	0.495636	3.173	1.83432
DKK1	22943	1.75121	1.77958	1.76539
FAM122B	159090	1.92871	1.57281	1.75076
RMI2	116028	0.962996	2.44555	1.70427
KIAA0101	9768	0.568113	2.81381	1.69096
DTL	51514	0.476132	2.87203	1.67408
FANCI	55215	0.369793	2.88624	1.62802
WDR76	79968	0.391376	2.72165	1.55651
SCD	6319	1.76674	1.31914	1.54294
BRIP1	83990	0.284824	2.79172	1.53827
DSCC1	79075	0.432397	2.64025	1.53633
GMNN	51053	0.373967	2.68118	1.52757
ELOVL6	79071	0.808255	2.19174	1.5
EXO1	9156	0.416494	2.56159	1.48904
INSIG1	3638	1.79863	1.13752	1.46807
STMN1	3925	0.96917	1.91555	1.44236
HSD17B11	51170	0.929263	1.92366	1.42646
MCM6	4175	0.254308	2.54555	1.39993
HELLS	3070	0.316133	2.44457	1.38035
GINS1	9837	0.245809	2.49198	1.3689
MAB21L3	126868	1.83083	0.893024	1.36193
POLA2	23649	0.317068	2.33703	1.32705
FANCD2	2177	0.478052	2.17102	1.32454
ZMYM2	7750	0.280405	2.33103	1.30572
ACAT2	39	0.556175	2.05073	1.30345
DBI	1622	0.782393	1.81863	1.30051
SYTL5	94122	0.00278172	2.59784	1.30031
BLM	641	0.162953	2.43432	1.29864
CLSPN	63967	0.170127	2.41673	1.29343
CENPI	2491	0.503457	2.07138	1.28742
LARP4	113251	2.22238	0.348817	1.2856
CTNNAL1	8727	1.39743	1.16557	1.2815
WDHD1	11169	0.313069	2.24481	1.27894
FIGNL1	63979	0.402433	2.13943	1.27093
ESCO2	157570	0.27774	2.25883	1.26828
DONSON	29980	0.581417	1.93681	1.25911
CAV2	858	0.475212	2.00964	1.24243
CENPU	79682	0.300188	2.18033	1.24026
MCM10	55388	0.0918813	2.37737	1.23462
TMEM64	169200	0.0511147	2.4167	1.23391
CAMK2N1	55450	1.25295	1.18505	1.219
FAM216A	29902	1.25672	1.18074	1.21873
CENPQ	55166	0.489761	1.94611	1.21793
RRM1	6240	0.57903	1.85657	1.2178
POLE2	5427	0.324231	2.10956	1.21689
CDK2	1017	0.165289	2.25963	1.21246
TMSB4X	7114	0.439483	1.96281	1.20115
TRNP1	388610	1.73109	0.664952	1.19802
SQLE	6713	1.00202	1.3913	1.19666
ATAD2	29028	0.509234	1.87204	1.19064
ANXA3	306	1.1686	1.21156	1.19008
DSN1	79980	0.370961	1.99966	1.18531
F2RL1	2150	0.857474	1.48451	1.17099
FDFT1	2222	1.09816	1.23229	1.16522
SEPP1	6414	1.38219	0.931974	1.15708
INPP4B	8821	0.961501	1.3403	1.1509
IDI1	3422	0.981491	1.25602	1.11876
HNRNPD	3184	0.25692	1.9667	1.11181
CDC7	8317	0.188416	2.03367	1.11104
ERCC6L	54821	0.361386	1.85914	1.11026
MYBL1	4603	0.584918	1.63318	1.10905
PLK2	10769	0.839545	1.36703	1.10329
UGCG	7357	0.480529	1.71399	1.09726
S100A10	6281	0.547934	1.64204	1.09499
MASTL	84930	0.420096	1.74901	1.08455
KNTC1	9735	0.549497	1.6161	1.0828
ARHGDIB	397	0.70467	1.46062	1.08265
NT5E	4907	0.708296	1.45336	1.08083
MSH6	2956	0.489653	1.66799	1.07882
CHEK1	1111	0.360014	1.7919	1.07596
CPA4	51200	2.07312	0.0651662	1.06914
CENPK	64105	0.289604	1.83884	1.06422
RAD54B	25788	0.123016	1.99836	1.06069
MELK	9833	0.278982	1.83468	1.05683
HSPB11	51668	0.348032	1.75896	1.0535
ATP2B4	493	0.346541	1.75817	1.05236
MICB	4277	0.387698	1.71294	1.05032
RBL1	5933	0.428767	1.67146	1.05012
TMEFF1	8577	1.16114	0.927979	1.04456
PDF	64146	0.700089	1.38296	1.04152
CCNB2	9133	0.70144	1.36876	1.0351
TMEM97	27346	0.426112	1.64106	1.03358
ACSL4	2182	0.500958	1.56522	1.03309
ANLN	54443	1.0176	1.0451	1.03135
NTAN1	123803	0.276291	1.78554	1.03092
TMEM14A	28978	0.317477	1.74413	1.03081
UNG	7374	0.0837396	1.97169	1.02771
SKP2	6502	0.462002	1.58699	1.0245
POLA1	5422	0.357469	1.69119	1.02433
RPS27	6232	1.26823	0.76813	1.01818
MCM8	84515	0.312139	1.71805	1.0151
UQCRH	7388	1.05254	0.976927	1.01474
GBP2	2634	1.04587	0.978467	1.01217
LMNB1	4001	0.337161	1.67776	1.00746
DHFR	1719	0.17025	1.82766	0.998956
RAD51AP1	10635	0.349679	1.64536	0.997521
HSPE1	3336	0.833957	1.15972	0.996839
LYPD6	130574	0.169529	1.8232	0.996365
GRAMD1C	54762	1.57766	0.412597	0.995127
ZWILCH	55055	0.0578551	1.92906	0.993458
C1orf112	55732	0.203597	1.7795	0.991549
PARD6B	84612	0.429185	1.55245	0.990815
SCHIP1	29970	0.952969	1.02822	0.990596
SPC25	57405	0.345811	1.6259	0.985855
CD47	961	0.435272	1.52693	0.981102
GRAMD3	65983	0.899641	1.05683	0.978234
PRIM2	5558	0.296247	1.65646	0.976354
BRCA1	672	0.210878	1.73657	0.973723
AHNAK	79026	0.912034	1.02379	0.967913
C12orf75	387882	0.366041	1.55827	0.962155
TIPIN	54962	0.0992598	1.82341	0.961334
KIF20A	10112	0.784452	1.13583	0.960142
GPATCH11	253635	0.661421	1.25703	0.959227
HPRT1	3251	0.477759	1.43644	0.957099
MSMO1	6307	0.881106	1.03295	0.95703
RAD51B	5890	0.422068	1.49105	0.956557
RPL39	6170	1.36272	0.545118	0.953918
SLC39A8	64116	0.46894	1.43801	0.953477
RPS15A	6210	1.30032	0.602328	0.951326
CEP55	55165	0.715627	1.17983	0.947727
CNPY4	245812	0.281826	1.61166	0.946745
DYNLT3	6990	0.120596	1.77219	0.946392
RPS4X	6191	1.19419	0.690339	0.942263
ITGB3BP	23421	0.697452	1.18025	0.93885
CENPN	55839	0.662989	1.21102	0.937006
HSP90AA1	3320	0.211258	1.66251	0.936882
RBMS2	5939	1.22732	0.632747	0.930035
SAP30	8819	1.13519	0.719904	0.927545
RPS24	6229	1.44852	0.40323	0.925875
GJA1	2697	0.058695	1.7864	0.922549
PGM5	5239	0.0612199	1.78273	0.921974
NMU	10874	0.579422	1.25996	0.919689
PRIM1	5557	0.761304	1.07671	0.919008
PQLC3	130814	0.327562	1.51021	0.918885
SPIN4	139886	0.265556	1.57142	0.918487
HSPB8	26353	0.000597778	1.82338	0.91199
RBBP7	5931	0.39138	1.43257	0.911976
KCTD6	200845	0.356443	1.46595	0.911195
PRR4	11272	1.54461	0.27724	0.910923
CEP78	84131	0.227307	1.59137	0.909337
RFC4	5984	0.529321	1.286	0.907659
MTFR2	113115	0.279399	1.53487	0.907135
SLC25A40	55972	0.164503	1.64819	0.906345
RPL41	6171	1.16003	0.650863	0.905448
EIF4A2	1974	1.12177	0.688656	0.905215
SMS	6611	0.70755	1.10073	0.904141
PDK3	5165	0.166206	1.64111	0.903656
MAGI3	260425	0.352026	1.45508	0.903552
LRRCC1	85444	0.104363	1.70239	0.903379
ZCCHC17	51538	0.24443	1.56087	0.902649
NECAB1	64168	0.0154914	1.78906	0.902277
TACSTD2	4070	0.477263	1.32397	0.900615
ANKRD32	84250	0.0836659	1.71651	0.900087
STARD4	134429	1.1848	0.608306	0.896551
DNA2	1763	0.260521	1.51864	0.889579
TGFB2	7042	0.00312084	1.76627	0.884693
SDC2	6383	0.009033	1.75799	0.883511
MPZL2	10205	0.216406	1.54918	0.882793
HAUS1	115106	0.191031	1.57303	0.882028
UBE2T	29089	1.02642	0.734656	0.880536
CCNA2	890	0.461994	1.29889	0.880441
ATAD5	79915	0.558918	1.20181	0.880365
HMGB2	3148	0.855217	0.903001	0.879109
LIN7A	8825	0.300798	1.45149	0.876146
ARHGAP29	9411	0.931375	0.818684	0.875029
PRKAR2B	5577	0.321047	1.3998	0.860422
NPNT	255743	0.310497	1.40989	0.860196
FANCL	55120	0.606713	1.11054	0.858627
ZNF185	7739	0.955909	0.759151	0.85753
CEP128	145508	0.500302	1.20904	0.854673
RMI1	80010	0.13743	1.565	0.851213
KIAA0391	9692	0.246015	1.45406	0.850036
MND1	84057	0.579589	1.11877	0.849177
ANXA2	302	0.541908	1.15568	0.848795
DEK	7913	0.391482	1.30543	0.848454
PLEKHB1	58473	0.18376	1.51142	0.847591
MMS22L	253714	0.24472	1.45042	0.847571
OTUD1	220213	0.916241	0.774512	0.845376
LIPH	200879	0.39823	1.289	0.843614
RPA3	6119	0.508993	1.17681	0.842903
AGR2	10551	0.0127556	1.66558	0.839166
PHTF2	57157	0.23553	1.43893	0.837229
NPC2	10577	1.45713	0.217039	0.837084
TSPAN5	10098	0.987356	0.684921	0.836139
ARHGEF28	64283	0.855766	0.812497	0.834131
PPIH	10465	0.463995	1.20141	0.832701
RAB13	5872	0.187305	1.47375	0.830528
MSH2	4436	0.146974	1.51314	0.830055
HMGCS1	3157	0.583395	1.07209	0.827744
SHFM1	7979	0.909493	0.743422	0.826457
ZFP36L2	678	0.71811	0.932887	0.825499
SQRDL	58472	0.618466	1.03209	0.825279
ZNRF2	223082	0.60883	1.03471	0.82177
C18orf54	162681	0.571952	1.06952	0.820736
PLEKHS1	79949	0.00724827	1.63391	0.820578
MKI67	4288	0.727905	0.912958	0.820432
KIF11	3832	0.325607	1.31409	0.819849
IRS2	8660	1.59983	0.0391846	0.819508
FADS1	3992	0.82885	0.808928	0.818889
ITGB1BP1	9270	0.577275	1.05829	0.817783
GPR137B	7107	0.818214	0.817342	0.817778
SMTNL2	342527	0.0221558	1.61314	0.817647
PFDN5	5204	1.12262	0.50834	0.81548
CCDC109B	55013	0.494707	1.13519	0.814948
TDRKH	11022	0.468069	1.15901	0.813538
MAGI1	9223	0.673798	0.952991	0.813394
DCK	1633	0.299961	1.32607	0.813017
BARD1	580	0.250361	1.37519	0.812776
TPM4	7171	0.50148	1.12223	0.811855
WEE1	7465	0.860472	0.763072	0.811772
PCNXL4	64430	0.502503	1.12028	0.811391
KIF15	56992	0.608089	1.01273	0.810408
TOPBP1	11073	0.263698	1.35533	0.809517
SMC2	10592	0.0800613	1.53624	0.80815
HADH	3033	0.440708	1.173	0.806856
YWHAH	7533	0.190531	1.42315	0.806841
MBOAT2	129642	0.665887	0.945271	0.805579
CDR1	1038	0.0264486	1.58168	0.804066
C11orf80	79703	0.50284	1.10335	0.803096
CYP51A1	1595	0.526322	1.07682	0.80157
CRYZ	1429	0.235306	1.36586	0.800583
FAM122C	159091	1.09365	0.504514	0.799082
RPL7	6129	1.00849	0.58419	0.79634
DNAJC9	23234	0.0622985	1.52993	0.796116
PALLD	23022	0.305577	1.28224	0.793908
OAT	4942	0.412239	1.17406	0.793147
PITPNC1	26207	0.553771	1.03228	0.793024
RPL23	9349	1.2475	0.329898	0.788698
FRMD3	257019	0.141137	1.43573	0.788433
MAOB	4129	0.494593	1.08216	0.788376
GRPR	2925	0.113196	1.46194	0.787567
ALDH7A1	501	0.264081	1.30986	0.786972
RPS3A	6189	1.02722	0.546024	0.786624
DYNLT1	6993	0.81801	0.7544	0.786205
MPHOSPH9	10198	0.577095	0.99493	0.786013
CKAP2	26586	0.570581	0.998882	0.784731
RPA1	6117	0.279066	1.2901	0.784584
KCTD3	51133	0.778738	0.787542	0.78314
CITED2	10370	0.164834	1.4014	0.783118
FANCB	2187	0.436451	1.12879	0.782619
YPEL2	388403	0.80261	0.761405	0.782008
RPL34	6164	1.23212	0.3288	0.780462
MIS18A	54069	0.232406	1.32793	0.780168
RPL31	6160	1.38793	0.167106	0.77752
RPL9	6133	1.21315	0.341681	0.777418
RFC5	5985	0.231629	1.3173	0.774462
BUB1B	701	0.424967	1.12105	0.773007
ERMP1	79956	0.291321	1.25393	0.772626
MDH1	4190	0.483333	1.06124	0.772288
F8A1	8263	1.07669	0.466224	0.771456
ACAA2	10449	0.596101	0.9465	0.771301
PLK4	10733	0.335738	1.20181	0.768773
FAM161A	84140	0.46359	1.07305	0.768318
LSM3	27258	0.491228	1.04325	0.767238
PRPS2	5634	0.0681546	1.46562	0.76689
CDK1	983	0.559861	0.973537	0.766699
MAP3K1	4214	0.280754	1.25062	0.765689
TAF9B	51616	0.476087	1.05527	0.765679
HMGN4	10473	0.609088	0.920645	0.764867
LTA4H	4048	0.885584	0.64413	0.764857
NUSAP1	51203	0.670786	0.856103	0.763444
RUNX2	860	0.786587	0.738113	0.76235
RPL26	6154	1.24135	0.280309	0.760831
DARS2	55157	0.0791423	1.43911	0.759126
LYPLA1	10434	0.257636	1.25972	0.758679
VAMP8	8673	0.541234	0.975467	0.75835
CASP8AP2	9994	0.229342	1.28568	0.757513
COPG2	26958	0.246334	1.25965	0.752991
THBS1	7057	0.649642	0.854711	0.752177
SCIN	85477	0.03193	1.47121	0.751568
PGM2	55276	0.225042	1.2779	0.751473
PVRL3	25945	0.414464	1.08787	0.751165
BRCA2	675	0.105248	1.39606	0.750654
HSP90AB1	3326	0.124006	1.37697	0.750487
FEZ2	9637	0.371141	1.12716	0.74915
KLHL5	51088	0.0465052	1.45036	0.748435
COQ3	51805	0.0432216	1.45278	0.748002
SNX7	51375	0.449157	1.04662	0.747886
YWHAQ	10971	0.269918	1.22453	0.747225
FDPS	2224	0.0134185	1.47755	0.745483
OIP5	11339	0.20756	1.28321	0.745383
CD44	960	0.51644	0.974094	0.745267
NXNL2	158046	0.0447281	1.44545	0.745088
TXNDC16	57544	0.398685	1.08641	0.74255
DNAAF2	55172	0.517973	0.965282	0.741628
DPY30	84661	0.616188	0.858582	0.737385
POLD3	10714	0.209411	1.265	0.737206
C5orf54	63920	0.516934	0.956077	0.736505
TSPAN13	27075	0.257533	1.21474	0.736138
OSER1	51526	0.899064	0.571863	0.735463
ZFP1	162239	0.382856	1.08772	0.735288
LRR1	122769	0.0293718	1.43975	0.734561
PTTG1	9232	0.919013	0.547267	0.73314
ABHD3	171586	0.470553	0.99252	0.731536
SLC25A24	29957	0.162236	1.29926	0.730746
RBM25	58517	0.177415	1.2835	0.730456
PRDX1	5052	0.274666	1.18559	0.730128
FUT8	2530	0.75741	0.702728	0.730069
ACACA	31	0.461395	0.998182	0.729788
RPL36A	6173	1.19208	0.266547	0.729316
YY1	7528	0.773104	0.682386	0.727745
ALDH6A1	4329	0.303829	1.1511	0.727463
CHRNA5	1138	0.0403747	1.40775	0.724063
SFT2D3	84826	0.835988	0.611529	0.723759
CALM2	805	0.796802	0.649134	0.722968
SESTD1	91404	0.0796109	1.3662	0.722908
KATNAL1	84056	0.393291	1.05209	0.722691
GPN3	51184	0.0780714	1.36621	0.72214
DSTN	11034	0.597838	0.845052	0.721445
SLC35A1	10559	0.35787	1.08464	0.721255
CBX1	10951	0.390364	1.05075	0.720555
PARPBP	55010	0.0306986	1.40972	0.720211
PAPSS2	9060	0.078313	1.36176	0.720034
MEST	4232	0.728582	0.710197	0.71939
COCH	1690	0.344469	1.09403	0.71925
FAM25A	643161	0.379247	1.05597	0.717611
ELOVL2	54898	0.261989	1.17129	0.716639
COA1	55744	0.44288	0.99014	0.71651
GABARAP	11337	0.829485	0.60336	0.716422
UBE2D1	7321	0.32634	1.10471	0.715524
IFNAR2	3455	0.243407	1.18706	0.715236
ABHD17B	51104	0.267515	1.16128	0.714395
DCAF6	55827	0.418497	1.00887	0.713682
KIF20B	9585	0.243379	1.18253	0.712954
C8orf46	254778	0.0263459	1.39905	0.712696
SKA3	221150	0.20867	1.21639	0.712528
CHPT1	56994	0.795705	0.628836	0.712271
TLCD1	116238	0.571126	0.850955	0.711041
CD59	966	0.725909	0.695701	0.710805
CEP170	9859	0.569121	0.852195	0.710658
TTF2	8458	0.124442	1.29537	0.709906
MRPL33	9553	0.55872	0.859793	0.709257
CCDC53	51019	0.503363	0.913076	0.70822
EED	8726	0.413809	1.00226	0.708034
MOSPD1	56180	1.34618	0.0695913	0.707886
ANXA1	301	0.324486	1.0911	0.707792
PDCD4	27250	0.337411	1.07705	0.707231
RTTN	25914	0.64264	0.770552	0.706596
APOD	347	0.0431213	1.36892	0.706022
EMP2	2013	0.330167	1.0818	0.705984
NEIL3	55247	0.445352	0.965196	0.705274
ASPM	259266	0.734075	0.676216	0.705145
RNF103	7844	0.589489	0.820748	0.705119
FAM26F	441168	0.28464	1.12462	0.704628
STOX1	219736	0.716977	0.688619	0.702798
DLGAP5	9787	0.619933	0.785282	0.702608
PBK	55872	0.357379	1.04701	0.702196
FAR2	55711	0.546015	0.857586	0.7018
TOMM6	100188893	0.76635	0.637116	0.701733
SRSF9	8683	0.239082	1.16313	0.701107
C4orf21	55345	0.518139	0.882077	0.700108
MECOM	2122	0.328801	1.0695	0.69915
CYB5A	1528	0.287958	1.10962	0.69879
TMEM212	389177	1.22304	0.173137	0.69809
DNMBP	23268	0.897582	0.496273	0.696927
PBX3	5090	0.480114	0.912875	0.696494
KIAA1524	57650	0.0642938	1.32696	0.695628
NSMCE4A	54780	0.502637	0.887244	0.69494
SFPQ	6421	0.511937	0.877586	0.694762
ECI2	10455	0.247505	1.14168	0.694595
RPS25	6230	1.25712	0.130255	0.693688
POP1	10940	0.144265	1.24233	0.693299
CD9	928	0.398885	0.987306	0.693096
HMGN2	3151	0.270064	1.11362	0.691842
EIF3E	3646	1.11291	0.26789	0.690401
HYLS1	219844	0.698491	0.681982	0.690236
RPS6	6194	0.890314	0.488606	0.68946
NME7	29922	0.52617	0.849799	0.687985
GSG2	83903	0.328401	1.04406	0.686229
CCDC34	91057	0.05522	1.31691	0.686065
SFXN3	81855	0.289625	1.08088	0.685253
TFPI	7035	0.398057	0.968575	0.683316
DDAH1	23576	0.533462	0.832081	0.682772
TMSB15B	286527	0.0812395	1.28352	0.682378
SLC36A4	120103	0.105686	1.25817	0.681926
LIPA	3988	0.356896	1.00669	0.681793
MATR3	9782	0.419084	0.943991	0.681537
TTI1	9675	0.170297	1.19104	0.680671
FAM111A	63901	0.368952	0.992181	0.680566
NUDT7	283927	0.702853	0.656798	0.679825
NUP62CL	54830	0.169123	1.18805	0.678587
HSD17B6	8630	0.217024	1.13851	0.677766
SGOL2	151246	0.308544	1.04655	0.677548
S100PBP	64766	0.420909	0.93095	0.67593
GAS2L3	283431	0.900519	0.450911	0.675715
DIAPH3	81624	0.361536	0.988986	0.675261
RALGPS2	55103	0.468654	0.880569	0.674612
MAD2L1	4085	0.165427	1.1824	0.673915
RAPGEF5	9771	0.492722	0.853598	0.67316
INSIG2	51141	0.736217	0.607661	0.671939
DGKH	160851	0.688773	0.651888	0.670331
C9orf40	55071	0.436065	0.903928	0.669997
ZMAT2	153527	0.168756	1.17119	0.669975
TMEM251	26175	0.263476	1.07621	0.669843
PLS1	5357	0.0865073	1.25254	0.669525
PIGF	5281	0.399335	0.939516	0.669425
PLSCR4	57088	0.919116	0.419642	0.669379
PRDX3	10935	0.286825	1.05	0.668415
GEMIN6	79833	0.298507	1.03774	0.668124
USMG5	84833	0.600077	0.735434	0.667755
GMCL1	64395	0.321566	1.00996	0.665763
OSMR	9180	0.138189	1.19093	0.664562
FAM217B	63939	0.226452	1.10003	0.663241
PIM1	5292	0.206339	1.12011	0.663226
NPM1	4869	0.55589	0.769621	0.662756
MGST2	4258	0.554381	0.770533	0.662457
KIAA1586	57691	0.213289	1.10903	0.661159
TMSB15A	11013	0.167926	1.15329	0.660607
COPRS	55352	0.359759	0.961003	0.660381
UBE2E3	10477	0.612978	0.707435	0.660206
SNRPG	6637	0.432848	0.884554	0.658701
AAED1	195827	0.749993	0.567096	0.658545
PPP1R3D	5509	0.256467	1.05951	0.657986
RPL35A	6165	1.10832	0.206486	0.657404
EIF2B3	8891	0.382122	0.932292	0.657207
TIFA	92610	0.220774	1.09126	0.656017
NEK7	140609	0.629583	0.681466	0.655525
GPR160	26996	0.376524	0.934426	0.655475
THYN1	29087	0.455326	0.853479	0.654402
XKRX	402415	0.0321926	1.27557	0.653881
BUB1	699	0.646917	0.660647	0.653782
ARHGAP11B	89839	0.859893	0.447628	0.653761
GGH	8836	0.361436	0.945999	0.653717
MRE11A	4361	0.377026	0.928998	0.653012
ALG10	84920	0.208871	1.09561	0.65224
PDSS1	23590	0.245841	1.05787	0.651857
B2M	567	0.707346	0.595226	0.651286
OSBPL9	114883	0.304298	0.997571	0.650935
APITD1	378708	0.0732954	1.22606	0.64968
MAP2	4133	0.39064	0.90765	0.649145
C11orf82	220042	0.0249121	1.27188	0.648397
CCDC77	84318	0.407364	0.88459	0.645977
CENPJ	55835	0.562587	0.72912	0.645854
TACC1	6867	0.116617	1.17379	0.645203
BBS9	27241	0.274437	1.01506	0.64475
FGD6	55785	0.997075	0.292331	0.644703
NDUFA1	4694	0.683156	0.605755	0.644456
SMURF2	64750	0.983411	0.305124	0.644268
HERC3	8916	0.554001	0.733838	0.643919
CXCR4	7852	0.0870363	1.19979	0.643416
TXN	7295	0.304323	0.980709	0.642516
HIBADH	11112	0.35335	0.930761	0.642055
SHISA9	729993	1.16847	0.115468	0.64197
DHX57	90957	0.338651	0.94401	0.64133
AP4B1	10717	0.33645	0.944045	0.640247
SLC20A1	6574	0.0847967	1.19303	0.638911
F8A1	8263	0.806473	0.471152	0.638812
FBXO5	26271	0.229445	1.04626	0.637855
ZNF589	51385	0.535588	0.738105	0.636846
NFS1	9054	0.0861879	1.1869	0.636542
TAF4B	6875	0.710723	0.562081	0.636402
RTN4	57142	0.474597	0.797942	0.63627
PIGC	5279	0.255401	1.01684	0.636119
MIS18BP1	55320	0.417401	0.853995	0.635698
GTF2I	2969	0.524469	0.746919	0.635694
UBR7	55148	0.224624	1.04603	0.635328
HEATR5B	54497	0.59959	0.670669	0.635129
GPRASP2	114928	0.336909	0.932058	0.634484
NUP155	9631	0.3019	0.966935	0.634418
ARL3	403	0.300916	0.966392	0.633654
RPL5	6125	1.0616	0.205355	0.63348
SF3B3	23450	0.0419287	1.2248	0.633365
SIX2	10736	0.144991	1.12127	0.63313
C7orf73	647087	0.236461	1.02969	0.633075
RGS10	6001	0.874699	0.391275	0.632987
PHF11	51131	0.377941	0.888012	0.632977
CBX5	23468	0.462286	0.801581	0.631933
AADAT	51166	0.239915	1.02373	0.631825
CERS5	91012	0.427653	0.835311	0.631482
UBL3	5412	0.177798	1.08481	0.631302
SASS6	163786	0.193403	1.06824	0.630823
NUP35	129401	0.493663	0.767965	0.630814
CTPS2	56474	0.495729	0.763578	0.629653
FRK	2444	0.382154	0.875705	0.62893
LIPG	9388	1.23748	0.019336	0.628409
CHML	1122	0.287556	0.966234	0.626895
GEN1	348654	0.206298	1.04729	0.626796
BRD8	10902	0.687363	0.565872	0.626617
STARD7	56910	0.349492	0.902014	0.625753
SKA2	348235	0.444564	0.806419	0.625492
ACSM3	6296	0.712572	0.53717	0.624871
PGRMC1	10857	0.448885	0.800153	0.624519
IPP	3652	0.184899	1.06411	0.624503
CSE1L	1434	0.262241	0.985501	0.623871
GALNT5	11227	1.24044	0.00704581	0.623744
RDM1	201299	0.417648	0.829767	0.623708
GNG10	2790	0.037113	1.20957	0.623342
PSIP1	11168	0.276395	0.969181	0.622788
HOXC9	3225	0.207326	1.03618	0.62175
CTGF	1490	0.346202	0.89729	0.621746
GLRX5	51218	0.383155	0.86026	0.621708
SPIN2B	474343	0.0760513	1.16719	0.621622
PIAS1	8554	0.557425	0.685652	0.621539
MPPED2	744	0.00757931	1.23515	0.621364
GLUD1	2746	0.562957	0.678765	0.620861
EMP1	2012	1.22346	0.0179994	0.62073
GRK5	2869	0.889843	0.351186	0.620514
GPSM2	29899	0.829697	0.411002	0.620349
C2orf68	388969	0.480058	0.759306	0.619682
SPIN2A	54466	0.339968	0.899263	0.619615
ST3GAL5	8869	0.135455	1.10357	0.619514
NAB1	4664	0.00668637	1.23212	0.619406
CASC5	57082	0.407556	0.830608	0.619082
FKBP1A	2280	0.650535	0.584178	0.617357
ASAP2	8853	0.831467	0.403151	0.617309
CYP24A1	1591	0.823462	0.410814	0.617138
PIK3CB	5291	0.401708	0.831566	0.616637
DHX15	1665	0.245711	0.987228	0.616469
VDAC3	7419	0.385267	0.846364	0.615816
SFR1	119392	0.226364	1.00394	0.615152
ANKRD36	375248	0.758379	0.471756	0.615067
COX6C	1345	0.680114	0.549397	0.614756
AAMDC	28971	0.130876	1.09855	0.614712
C14orf2	9556	0.758877	0.469109	0.613993
LYSMD2	256586	0.473992	0.752947	0.61347
PDE4B	5142	0.742281	0.484532	0.613406
THOC3	84321	0.0512095	1.17476	0.612985
HMGN3	9324	0.232486	0.993167	0.612826
ZBTB37	84614	0.606057	0.61823	0.612143
FAM3C	10447	0.828313	0.394174	0.611243
PLCB4	5332	0.539363	0.682239	0.610801
PDZD11	51248	0.492739	0.72858	0.61066
POLQ	10721	0.291124	0.929869	0.610497
ANKRD1	27063	0.0377252	1.1821	0.609913
SUPT16H	11198	0.374937	0.844495	0.609716
NEDD9	4739	0.095943	1.12222	0.609082
HNRNPA1	3178	0.22284	0.994419	0.608629
GDF11	10220	0.300389	0.915682	0.608036
INPP5F	22876	0.389464	0.825354	0.607409
SLC39A1	27173	0.0740535	1.13831	0.606182
SMN2	6607	0.582689	0.627407	0.605048
CETN3	1070	0.292278	0.916955	0.604617
ATPAF1	64756	0.587347	0.620866	0.604107
TBCK	93627	0.317375	0.890663	0.604019
ARHGAP11A	9824	0.368136	0.839648	0.603892
EIF4B	1975	0.995358	0.21146	0.603409
KIF4A	24137	0.519362	0.687188	0.603275
SLC16A7	9194	0.590815	0.615044	0.602929
NAF1	92345	0.256359	0.949287	0.602823
PWP1	11137	0.254053	0.951396	0.602725
GXYLT2	727936	0.757637	0.44491	0.601273
LPCAT3	10162	0.128439	1.07373	0.601086
GAB1	2549	0.323154	0.878285	0.60072
BMPR1A	657	0.293815	0.904726	0.59927
PM20D2	135293	0.628734	0.568025	0.59838
ATP5H	10476	0.249164	0.946558	0.597861
CPNE3	8895	0.237824	0.957472	0.597648
MAPRE2	10982	0.123268	1.06757	0.595417
CDCA2	157313	0.559937	0.630482	0.59521
METTL9	51108	0.438214	0.750877	0.594546
SETD9	133383	0.237681	0.950451	0.594066
ANKRD26	22852	0.41363	0.774228	0.593929
RAI14	26064	0.181118	1.00433	0.592725
LRRC49	54839	0.0423504	1.14151	0.591933
PIGV	55650	0.429279	0.754281	0.59178
NNT	23530	0.0072922	1.1757	0.591497
RFC1	5981	0.265954	0.917004	0.591479
DUSP5	1847	0.773548	0.408779	0.591164
STON1	11037	0.0330973	1.14847	0.590783
SRPK2	6733	0.229368	0.951517	0.590443
PDP1	54704	0.4364	0.744414	0.590407
ANKHD1	54882	0.629669	0.549919	0.589794
MDM1	56890	0.194137	0.985282	0.589709
TMPO	7112	0.0636367	1.11415	0.588893
C9orf41	138199	0.454215	0.721051	0.587633
WDYHV1	55093	0.56654	0.608289	0.587414
CEP152	22995	0.263581	0.910391	0.586986
OGFRL1	79627	0.318545	0.851773	0.585159
C4orf19	55286	0.0026524	1.16619	0.584419
STX2	2054	0.197566	0.971206	0.584386
ZDHHC13	54503	0.465104	0.702173	0.583639
IFNGR2	3460	0.716135	0.449612	0.582873
KIF16B	55614	0.121126	1.04457	0.58285
SRR	63826	0.13668	1.02657	0.581626
SIMC1	375484	0.543228	0.61971	0.581469
ZNF100	163227	0.0526837	1.11015	0.581416
IAH1	285148	0.574523	0.5881	0.581312
OPN3	23596	0.571913	0.58889	0.580402
COX7B	1349	0.596588	0.563539	0.580064
RAD18	56852	0.277906	0.878913	0.578409
TMEM194A	23306	0.2647	0.89197	0.578335
SESN3	143686	0.405469	0.750337	0.577903
DCLRE1A	9937	0.0180666	1.1357	0.576883
OSTF1	26578	0.179697	0.973758	0.576728
RNF115	27246	0.523102	0.630228	0.576665
MMD	23531	0.685567	0.46754	0.576553
TMEM243	79161	0.436075	0.716705	0.57639
MYO9A	4649	0.530114	0.62219	0.576152
JPH1	56704	0.0755309	1.07624	0.575886
FABP5	2171	0.0119718	1.13798	0.574978
SYCP2	10388	0.0179175	1.13199	0.574953
PEX11A	8800	0.332807	0.816949	0.574878
PPT1	5538	0.481547	0.667774	0.574661
PRKD3	23683	0.107264	1.03974	0.5735
TARBP1	6894	0.519731	0.626404	0.573068
SPATS2	65244	0.27996	0.86581	0.572885
PCP4L1	654790	0.246163	0.898847	0.572505
TPT1	7178	0.570126	0.572327	0.571226
TMEM14B	81853	0.297977	0.844046	0.571011
SCFD2	152579	0.452685	0.688895	0.57079
KIAA1715	80856	0.285313	0.856113	0.570713
WASF1	8936	0.347719	0.79289	0.570305
PFN2	5217	0.171648	0.968176	0.569912
CRIPT	9419	0.461251	0.677916	0.569584
NAPEPLD	222236	0.278885	0.858394	0.568639
CENPF	1063	0.683311	0.453203	0.568257
MRPL50	54534	0.180208	0.956075	0.568141
C2orf44	80304	0.188343	0.947866	0.568105
OSBPL1A	114876	0.466559	0.669083	0.567821
ELF2	1998	0.428913	0.706226	0.56757
CUTC	51076	0.350511	0.784573	0.567542
POLK	51426	0.442226	0.691616	0.566921
CFDP1	10428	0.185889	0.947897	0.566893
EID2	163126	0.4231	0.710602	0.566851
SDCBP	6386	0.0552756	1.07796	0.566619
GTF3A	2971	0.593231	0.538052	0.565641
PPP1R3E	90673	0.543844	0.587027	0.565435
HEBP2	23593	0.368842	0.760972	0.564907
ANO6	196527	0.587497	0.541957	0.564727
ZNF180	7733	0.245219	0.883435	0.564327
ANKRD36B	57730	0.750181	0.37845	0.564315
PYGL	5836	0.14394	0.984232	0.564086
ASUN	55726	0.438562	0.68959	0.564076
TOB1	10140	0.301447	0.826162	0.563804
ESD	2098	0.706087	0.421025	0.563556
NUP205	23165	0.196521	0.929492	0.563006
TPX2	22974	0.659543	0.466414	0.562979
TMEM65	157378	0.23652	0.889226	0.562873
BUD13	84811	0.321531	0.803729	0.56263
PI4K2B	55300	0.198791	0.924798	0.561795
EIF4EBP2	1979	0.217007	0.906296	0.561652
C1QBP	708	0.521743	0.601314	0.561529
SRSF10	10772	0.0321256	1.08994	0.561032
ATL3	25923	0.411467	0.709891	0.560679
USP1	7398	0.0205738	1.10062	0.560596
RNF38	152006	0.54785	0.572371	0.560111
TPGS2	25941	0.127718	0.991942	0.55983
MYO16	23026	0.0148198	1.10401	0.559415
C6orf203	51250	0.426685	0.689943	0.558314
TMOD2	29767	0.777322	0.33887	0.558096
KDELC1	79070	0.490615	0.624197	0.557406
CPOX	1371	0.0336897	1.08084	0.557266
MTRNR2L10	100463488	0.961061	0.152509	0.556785
TRIM2	23321	0.410001	0.701691	0.555846
ZNF823	55552	0.166038	0.945552	0.555795
IL6ST	3572	0.143148	0.968149	0.555649
CAP1	10487	0.340887	0.769847	0.555367
IVNS1ABP	10625	0.193298	0.91734	0.555319
IL17RB	55540	0.322063	0.788159	0.555111
TWIST1	7291	0.510852	0.598366	0.554609
F2R	2149	0.442695	0.662098	0.552397
CCDC14	64770	0.215415	0.888299	0.551857
CAND1	55832	0.152848	0.95068	0.551764
PNP	4860	0.148039	0.955034	0.551537
TMEM59	9528	0.60124	0.501608	0.551424
NRIP1	8204	0.700372	0.40013	0.550251
C6orf62	81688	0.0575797	1.04112	0.54935
ARHGAP18	93663	0.386664	0.71191	0.549287
C3orf52	79669	0.146709	0.951295	0.549002
SEPT11	55752	0.243533	0.852025	0.547779
FAM76A	199870	0.491518	0.603642	0.54758
YEATS4	8089	0.131125	0.963213	0.547169
INADL	10207	0.631814	0.459941	0.545877
FGFBP1	9982	0.923828	0.167524	0.545676
UTP18	51096	0.240927	0.847723	0.544325
CCDC28A	25901	0.66157	0.426708	0.544139
YWHAZ	7534	0.232155	0.854721	0.543438
IMP3	55272	0.183833	0.903016	0.543424
NUP153	9972	0.337718	0.748287	0.543003
NIF3L1	60491	0.494778	0.590923	0.54285
C2CD5	9847	0.465729	0.619907	0.542818
ACYP1	97	0.280948	0.8046	0.542774
ELOVL5	60481	0.560927	0.524443	0.542685
COX7A2	1347	0.558448	0.525654	0.542051
LRRC28	123355	0.272355	0.810668	0.541512
GREB1L	80000	0.389317	0.692952	0.541135
DOCK1	1793	0.360051	0.722119	0.541085
NOP10	55505	0.522918	0.559226	0.541072
REEP3	221035	0.509748	0.571075	0.540412
TMEM107	84314	0.180374	0.900034	0.540204
MTMR11	10903	0.0341132	1.04576	0.539934
FAM72B	653820	0.781262	0.297043	0.539152
LIMA1	51474	0.775185	0.302963	0.539074
IMMT	10989	0.411236	0.66623	0.538733
ANAPC4	29945	0.102084	0.97515	0.538617
FAM81A	145773	0.252755	0.824441	0.538598
TAF12	6883	0.49874	0.57754	0.53814
TOMM5	401505	0.115431	0.960588	0.53801
LPIN1	23175	0.589675	0.485858	0.537767
MCMBP	79892	0.239834	0.835263	0.537548
RHOBTB3	22836	0.229396	0.845604	0.5375
TMEM194B	100131211	0.115689	0.95868	0.537185
SYBU	55638	0.0963279	0.977145	0.536736
CTDSPL2	51496	0.209001	0.864311	0.536656
QSER1	79832	0.217244	0.855394	0.536319
PIK3CA	5290	0.425134	0.647468	0.536301
WDR19	57728	0.625845	0.446456	0.536151
ZNF318	24149	0.593999	0.477933	0.535966
SLC38A9	153129	0.240821	0.83083	0.535825
FKBP5	2289	0.0285822	1.04249	0.535537
RPL22	6146	0.962796	0.108069	0.535432
NBPF14	25832	0.481859	0.588972	0.535415
MRRF	92399	0.861953	0.20864	0.535297
HDAC3	8841	0.261009	0.809324	0.535167
PKP2	5318	0.311182	0.758737	0.53496
EXTL2	2135	0.144362	0.925383	0.534873
GLUD2	2747	0.356889	0.712711	0.5348
CDC42	998	0.419283	0.650055	0.534669
KLHDC2	23588	0.449914	0.619213	0.534563
CSPP1	79848	0.502669	0.566186	0.534428
WIPF3	644150	0.512556	0.555364	0.53396
MBNL2	10150	0.489572	0.578047	0.53381
RBBP4	5928	0.245834	0.82154	0.533687
LPCAT2	54947	0.39508	0.670818	0.532949
ANKRD46	157567	0.420812	0.64476	0.532786
FBXL4	26235	0.316332	0.74851	0.532421
ASTE1	28990	0.0934618	0.966996	0.530229
GLCCI1	113263	0.293044	0.76693	0.529987
GSTO1	9446	0.01624	1.04295	0.529596
CUL4B	8450	0.522309	0.5359	0.529105
DCDC2	51473	0.00129525	1.05609	0.52869
PALB2	79728	0.28649	0.768981	0.527735
PRRG4	79056	0.252438	0.802499	0.527468
RNF138	51444	0.0884671	0.965982	0.527224
TRIM24	8805	0.569393	0.484445	0.526919
HPS5	11234	0.140493	0.913003	0.526748
PNRC2	55629	0.0578274	0.995303	0.526565
NKTR	4820	0.590208	0.461391	0.5258
AIDA	64853	0.255274	0.794859	0.525067
DDX10	1662	0.270545	0.779443	0.524994
CMAS	55907	0.139389	0.909606	0.524498
NEK2	4751	0.629238	0.417817	0.523528
MAT2A	4144	0.534349	0.512593	0.523471
ANP32B	10541	0.216496	0.829767	0.523132
LAMTOR5	10542	0.570647	0.475284	0.522966
THNSL1	79896	0.220835	0.824719	0.522777
ENTPD5	957	0.397856	0.646928	0.522392
DEPDC1B	55789	0.402082	0.642111	0.522096
TMEM218	219854	0.151971	0.891918	0.521944
SLC44A1	23446	0.276311	0.767258	0.521784
SGOL1	151648	0.403417	0.638969	0.521193
TPM1	7168	0.519907	0.521829	0.520868
TRMT10C	54931	0.19466	0.84706	0.52086
TFRC	7037	0.0726749	0.968358	0.520517
PIGU	128869	0.190795	0.849173	0.519984
DLEU7	220107	0.831147	0.208765	0.519956
ZNF619	285267	0.177438	0.860657	0.519047
ZSCAN26	7741	0.488542	0.549354	0.518948
KIF23	9493	0.4963	0.541204	0.518752
HSD17B7	51478	0.453743	0.582674	0.518209
RACGAP1	29127	0.799195	0.23574	0.517467
C6orf165	154313	0.102527	0.931129	0.516828
RB1	5925	0.189365	0.844133	0.516749
NDUFB3	4709	0.402435	0.630616	0.516526
SAMD13	148418	0.712274	0.320026	0.51615
CDKN3	1033	0.448305	0.583854	0.516079
SLC19A2	10560	0.211462	0.819172	0.515317
REL	5966	0.359647	0.670797	0.515222
CASP2	835	0.1884	0.841851	0.515126
KLHL23	151230	0.0502917	0.979936	0.515114
SYTL4	94121	0.191707	0.8385	0.515103
CCP110	9738	0.228124	0.801939	0.515031
ENC1	8507	0.418455	0.611606	0.51503
METAP1	23173	0.19007	0.839315	0.514693
SFT2D1	113402	0.300225	0.728558	0.514391
TMEM60	85025	0.306892	0.721849	0.51437
C11orf57	55216	0.299521	0.728039	0.51378
PPIP5K2	23262	0.0565113	0.969419	0.512965
SET	6418	0.305405	0.719827	0.512616
GPR89C	728932	0.293531	0.731552	0.512542
SLC12A2	6558	0.212928	0.811553	0.512241
SMAD3	4088	0.960583	0.0634825	0.512033
BZW2	28969	0.248464	0.774589	0.511526
ZNF485	220992	0.219653	0.801847	0.51075
VRK1	7443	0.229942	0.791469	0.510705
DUSP11	8446	0.360499	0.660573	0.510536
PRPS1	5631	0.210864	0.80871	0.509787
ARMC1	55156	0.0916586	0.927743	0.509701
NAP1L1	4673	0.628616	0.390538	0.509577
OXCT1	5019	0.130411	0.888666	0.509538
REEP1	65055	0.139741	0.879087	0.509414
CBR3	874	0.150923	0.867822	0.509372
SUV39H2	79723	3.95621e-05	1.0165	0.508271
TMA7	51372	0.38709	0.628882	0.507986
JAK1	3716	0.031515	0.983922	0.507718
PEX1	5189	0.409909	0.605478	0.507694
VEZT	55591	0.478791	0.535996	0.507393
DIAPH1	1729	0.144941	0.869604	0.507272
SRSF1	6426	0.161687	0.851972	0.50683
TEFM	79736	0.298893	0.714421	0.506657
PTGES3	10728	0.244144	0.768893	0.506518
CREBL2	1389	0.588059	0.423816	0.505937
FAM210A	125228	0.399322	0.612471	0.505896
TRIQK	286144	0.455863	0.555538	0.505701
FAM69A	388650	0.402353	0.608833	0.505593
EFTUD1	79631	0.391535	0.619571	0.505553
BNIP3L	665	0.289224	0.721829	0.505527
OPHN1	4983	0.115244	0.895554	0.505399
F8A1	8263	0.798323	0.21167	0.504996
SNAPIN	23557	0.0655249	0.944108	0.504816
TRPC1	7220	0.709938	0.298731	0.504335
HIAT1	64645	0.339711	0.667303	0.503507
XRCC6BP1	91419	0.103402	0.901362	0.502382
SPRED1	161742	0.226083	0.778407	0.502245
ZNF774	342132	0.330066	0.674284	0.502175
ATP5J	522	0.494676	0.509066	0.501871
GPD2	2820	0.302253	0.701486	0.501869
PHF3	23469	0.529356	0.474335	0.501845
TTK	7272	0.453647	0.549988	0.501818
POLE3	54107	0.322718	0.680812	0.501765
KIF14	9928	0.468905	0.533171	0.501038
ARL6IP5	10550	0.459332	0.542628	0.50098
SGK1	6446	0.193748	0.807582	0.500665
CD109	135228	0.723808	0.27749	0.500649
TAF1B	9014	0.264877	0.735436	0.500157
FANCM	57697	0.0333385	0.966948	0.500143
MORF4L1	10933	0.370647	0.629344	0.499996
PHF14	9678	0.384909	0.615071	0.49999
PPA1	5464	0.606707	0.392781	0.499744
UBE2N	7334	0.169272	0.829354	0.499313
SPHAR	10638	0.556953	0.441671	0.499312
CTNND1	1500	0.479475	0.518652	0.499063
VPS13A	23230	0.276348	0.721175	0.498761
RNASEH2B	79621	0.261761	0.734729	0.498245
PDE5A	8654	0.401121	0.595308	0.498214
PLS3	5358	0.285107	0.71123	0.498169
GART	2618	0.328115	0.667189	0.497652
TIMM21	29090	0.0065133	0.987397	0.496955
TPP2	7174	0.511853	0.481573	0.496713
CCDC15	80071	0.244391	0.748653	0.496522
MAP3K4	4216	0.385403	0.607488	0.496446
HMGCR	3156	0.353517	0.639103	0.49631
KDELR3	11015	0.228932	0.76317	0.496051
EXOSC6	118460	0.258732	0.732285	0.495508
MET	4233	0.829559	0.161382	0.49547
ACTL6A	86	0.12771	0.862985	0.495347
NCOA4	8031	0.551537	0.439016	0.495276
CKLF	51192	0.175132	0.815123	0.495127
SERTAD4	56256	0.348193	0.641732	0.494962
MLLT10	8028	0.472982	0.516557	0.494769
RASA2	5922	0.63981	0.349493	0.494651
PEA15	8682	0.29542	0.693137	0.494278
NUDT6	11162	0.391754	0.596214	0.493984
IPO7	10527	0.485445	0.502436	0.493941
SNRPE	6635	0.241107	0.746698	0.493902
GNA14	9630	0.045491	0.938908	0.4922
CENPW	387103	0.374862	0.609385	0.492124
SKAP2	8935	0.149006	0.834827	0.491917
E2F3	1871	0.0876683	0.896095	0.491882
NAIP	4671	0.466204	0.517552	0.491878
MSL1	339287	0.392141	0.590591	0.491366
DLC1	10395	0.00187822	0.980514	0.491196
PPP4R1	9989	0.17798	0.804372	0.491176
CNOT11	55571	0.417222	0.564757	0.490989
ZNF473	25888	0.307341	0.674257	0.490799
METTL23	124512	0.391167	0.590126	0.490646
RIC8B	55188	0.337762	0.6434	0.490581
CRIM1	51232	0.175799	0.804797	0.490298
IMMP2L	83943	0.647993	0.332077	0.490035
ORMDL2	29095	0.248034	0.730781	0.489408
SHQ1	55164	0.0255446	0.953205	0.489375
OXR1	55074	0.0327156	0.945401	0.489058
PRKCI	5584	0.0849665	0.893126	0.489046
MTIF3	219402	0.745724	0.231917	0.48882
ETNK1	55500	0.14518	0.831641	0.488411
RAD21	5885	0.473551	0.503073	0.488312
LDHA	3939	0.0262001	0.949647	0.487923
PRMT5	10419	0.273788	0.701972	0.48788
FUCA1	2517	0.302049	0.673598	0.487823
ZNF337	26152	0.735849	0.238495	0.487172
TAF5	6877	0.334273	0.639383	0.486828
CHEK2	11200	0.172525	0.800993	0.486759
LRRC8C	84230	0.281309	0.690813	0.486061
ECT2	1894	0.232529	0.739384	0.485956
MFSD1	64747	0.310678	0.661108	0.485893
UBE2Q1	55585	0.492226	0.478675	0.485451
CDK2AP1	8099	0.0321287	0.937805	0.484967
NPAT	4863	0.18275	0.786673	0.484712
FUT10	84750	0.349092	0.61881	0.483951
ENPP5	59084	0.185837	0.781651	0.483744
OMA1	115209	0.430147	0.535889	0.483018
SNRNP40	9410	0.0464809	0.919174	0.482828
ANKRD18A	253650	0.464363	0.501035	0.482699
ITSN1	6453	0.17007	0.794258	0.482164
DNAJB4	11080	0.550158	0.413917	0.482038
ZNF860	344787	0.176135	0.787772	0.481953
FRYL	285527	0.189485	0.774341	0.481913
CWC15	51503	0.368376	0.595098	0.481737
TSPAN1	10103	0.109488	0.853508	0.481498
ENOPH1	58478	0.10247	0.860441	0.481456
ATP5B	506	0.161699	0.800999	0.481349
MARC1	64757	0.273269	0.689402	0.481335
YLPM1	56252	0.439406	0.523061	0.481234
IPO8	10526	0.124449	0.83766	0.481054
RARS2	57038	0.392144	0.569347	0.480745
CERS2	29956	0.426355	0.535128	0.480742
UTP20	27340	0.165497	0.795677	0.480587
POC1B	282809	0.217236	0.743367	0.480301
EPCAM	4072	0.481051	0.479334	0.480192
PSMD11	5717	0.0284739	0.931182	0.479828
YWHAE	7531	0.638957	0.319777	0.479367
AMZ2	51321	0.544286	0.413902	0.479094
XPA	7507	0.572996	0.384724	0.47886
COMMD10	51397	0.236289	0.720495	0.478392
CDKN2AIPNL	91368	0.184499	0.772031	0.478265
CDC25C	995	0.461753	0.494695	0.478224
ZNF326	284695	0.147183	0.809126	0.478154
NOL8	55035	0.320774	0.635222	0.477998
ZNF184	7738	0.0935041	0.862428	0.477966
CCNG2	901	0.898537	0.0570305	0.477784
MBTD1	54799	0.55241	0.402407	0.477408
ADAMTS1	9510	0.0153963	0.938626	0.477011
NEDD4L	23327	0.336853	0.614333	0.475593
SHCBP1	79801	0.0621598	0.888912	0.475536
ABCB10	23456	0.125646	0.82538	0.475513
AK4	205	0.538711	0.412113	0.475412
SFT2D2	375035	0.0122963	0.938511	0.475404
ERLIN1	10613	0.365519	0.584989	0.475254
MYZAP	100820829	0.457285	0.492474	0.47488
SRRD	402055	0.348411	0.600756	0.474584
MYL12A	10627	0.381768	0.567073	0.47442
S100A4	6275	0.650743	0.297846	0.474295
ZFP62	643836	0.463279	0.485303	0.474291
TERF1	7013	0.121112	0.827258	0.474185
TRA2B	6434	0.00816225	0.940204	0.474183
AZIN1	51582	0.17237	0.775693	0.474031
NDC1	55706	0.0821288	0.865788	0.473959
SMARCA1	6594	0.00571041	0.940677	0.473193
AK3	50808	0.397095	0.547123	0.472109
MCL1	4170	0.226548	0.717642	0.472095
GLT8D1	55830	0.357505	0.586011	0.471758
PTDSS1	9791	0.237116	0.705505	0.471311
APAF1	317	0.179489	0.763117	0.471303
C1GALT1C1	29071	0.16943	0.77263	0.47103
SLC12A6	9990	0.633941	0.307237	0.470589
ZNF565	147929	0.312208	0.628639	0.470424
FAM49B	51571	0.146314	0.793924	0.470119
FAM213A	84293	0.407828	0.532365	0.470096
TXNRD3	114112	0.168456	0.771338	0.469897
RFWD2	64326	0.396507	0.542862	0.469685
SRSF11	9295	0.244324	0.694572	0.469448
PAIP2	51247	0.286836	0.651688	0.469262
USP37	57695	0.212132	0.726381	0.469257
PPP1R11	6992	0.512534	0.425517	0.469025
PRRG1	5638	0.294629	0.643252	0.468941
ABCC9	10060	0.643846	0.293051	0.468449
HSPA8	3312	0.0379049	0.898984	0.468445
ZNF620	253639	0.1972	0.737748	0.467474
TSPYL4	23270	0.105931	0.82891	0.467421
KPNA3	3839	0.207036	0.727301	0.467168
DERA	51071	0.0560374	0.878215	0.467126
FBXL3	26224	0.186581	0.747464	0.467022
GABARAPL2	11345	0.53907	0.394674	0.466872
ARID4A	5926	0.423091	0.51044	0.466766
MBD5	55777	0.543122	0.389967	0.466545
SLC35F5	80255	0.549423	0.383035	0.466229
RIF1	55183	0.171428	0.76062	0.466024
ZNF512	84450	0.627155	0.304047	0.465601
CEP290	80184	0.492735	0.437642	0.465189
SDHC	6391	0.00694997	0.923345	0.465148
C11orf74	119710	0.168846	0.760983	0.464914
WDR70	55100	0.413055	0.516449	0.464752
ITGA6	3655	0.463326	0.466169	0.464748
NRAS	4893	0.0627362	0.866288	0.464512
COL21A1	81578	0.0111139	0.917408	0.464261
RGS2	5997	0.784118	0.144044	0.464081
PPP2R5A	5525	0.0252649	0.902736	0.464
DICER1	23405	0.426574	0.500563	0.463569
HOXA5	3202	0.825356	0.101774	0.463565
STAU2	27067	0.14653	0.780327	0.463428
SPATA13	221178	0.31184	0.614741	0.46329
TCERG1	10915	0.306195	0.620205	0.4632
SPOPL	339745	0.179094	0.745844	0.462469
PUS7L	83448	0.167875	0.757001	0.462438
WWP1	11059	0.306226	0.61816	0.462193
ALG8	79053	0.301805	0.621394	0.461599
BRCC3	79184	0.127298	0.795354	0.461326
KIF21A	55605	0.127498	0.79508	0.461289
MOCS2	4338	0.12786	0.794412	0.461136
MEX3B	84206	0.0146914	0.907418	0.461055
RABGAP1L	9910	0.33173	0.590145	0.460938
PSMG2	56984	0.369958	0.551452	0.460705
DDX20	11218	0.0381761	0.882649	0.460413
ADNP	23394	0.224677	0.695601	0.460139
GALNT12	79695	0.0465077	0.873417	0.459962
GMFB	2764	0.117056	0.80272	0.459888
VEPH1	79674	0.130749	0.788564	0.459657
EPHX4	253152	0.374455	0.544396	0.459426
ZDHHC6	64429	0.286664	0.631409	0.459037
LUC7L3	51747	0.353363	0.564508	0.458936
GPR89B	51463	0.242184	0.675676	0.45893
SNRPD3	6634	0.462831	0.454396	0.458614
CAPZA1	829	0.195966	0.721153	0.458559
PDS5B	23047	0.202879	0.71402	0.458449
DSG2	1829	0.191595	0.724071	0.457833
SPICE1	152185	0.225008	0.690207	0.457608
IARS2	55699	0.194968	0.720226	0.457597
HAT1	8520	0.0381743	0.876894	0.457534
SEPT3	55964	0.439548	0.475489	0.457519
PCMTD2	55251	0.454026	0.460432	0.457229
TET1	80312	0.374132	0.53955	0.456841
N6AMT2	221143	0.246481	0.666959	0.45672
NAE1	8883	0.143613	0.769675	0.456644
PMP22	5376	0.246508	0.666079	0.456293
SPIN1	10927	0.0844902	0.827618	0.456054
ZNF789	285989	0.363168	0.548789	0.455979
AGO3	192669	0.524748	0.387207	0.455978
VPS45	11311	0.306764	0.605066	0.455915
NARS2	79731	0.243255	0.668465	0.45586
ZNF165	7718	0.51948	0.391642	0.455561
SUCLG1	8802	0.555403	0.355649	0.455526
FBXO9	26268	0.111369	0.799484	0.455427
RPL11	6135	0.830549	0.0800858	0.455317
SNX14	57231	0.284746	0.625485	0.455116
BRD7	29117	0.340669	0.569171	0.45492
P4HA1	5033	0.144032	0.76562	0.454826
GPR125	166647	0.408486	0.500815	0.454651
TERF2IP	54386	0.643408	0.265833	0.454621
ANKRD18B	441459	0.118922	0.790132	0.454527
ARNTL2	56938	0.224833	0.684117	0.454475
WRB	7485	0.124262	0.784556	0.454409
ZNF92	168374	0.0607551	0.848051	0.454403
MAP7D3	79649	0.70893	0.199332	0.454131
MAT2B	27430	0.327467	0.57998	0.453724
PRUNE	58497	0.269635	0.637552	0.453593
HFE	3077	0.148468	0.758618	0.453543
LRCH3	84859	0.311766	0.595272	0.453519
CCDC58	131076	0.293007	0.613857	0.453432
DENND4A	10260	0.498624	0.408014	0.453319
RPS23	6228	0.633344	0.273008	0.453176
CENPC	1060	0.342697	0.563464	0.45308
DCBLD2	131566	0.180648	0.725253	0.45295
FAM35A	54537	0.0843182	0.821321	0.452819
RWDD1	51389	0.479914	0.425037	0.452476
MEGF9	1955	0.331641	0.573165	0.452403
RABEP1	9135	0.312857	0.590857	0.451857
DENND6A	201627	0.44704	0.456625	0.451833
NHEJ1	79840	0.521436	0.38207	0.451753
BMP2K	55589	0.348644	0.554753	0.451698
MLH1	4292	0.297723	0.605542	0.451633
MFSD11	79157	0.243208	0.659717	0.451462
STAMBPL1	57559	0.433435	0.469453	0.451444
ALCAM	214	0.428707	0.473968	0.451337
SP100	6672	0.0639705	0.838087	0.451029
C14orf1	11161	0.358571	0.543307	0.450939
ANKRD17	26057	0.344121	0.556427	0.450274
RAVER2	55225	0.321136	0.579075	0.450105
REV1	51455	0.431979	0.468139	0.450059
C4orf46	201725	0.134651	0.765303	0.449977
HDAC8	55869	0.137227	0.762488	0.449858
LNPEP	4012	0.374813	0.524407	0.44961
SLBP	7884	0.244576	0.654583	0.44958
MLLT11	10962	0.0699732	0.829181	0.449577
TTLL5	23093	0.0112826	0.887642	0.449462
CCT2	10576	0.0833772	0.814444	0.448911
CRISPLD2	83716	0.0330345	0.864111	0.448573
FAM134B	54463	0.186863	0.709676	0.448269
SETDB1	9869	0.386685	0.50976	0.448222
EIF2AK1	27102	0.353021	0.543233	0.448127
CTSV	1515	0.00892394	0.887319	0.448121
TBC1D9	23158	0.205515	0.6905	0.448007
DPY19L4	286148	0.0164462	0.878826	0.447636
ZNF700	90592	0.325253	0.569173	0.447213
DYNC1I2	1781	0.191591	0.702453	0.447022
ADIPOR2	79602	0.245713	0.647725	0.446719
C20orf24	55969	0.191414	0.701689	0.446552
SCAMP1	9522	0.113194	0.779844	0.446519
ERI1	90459	0.0986382	0.793819	0.446229
LETM2	137994	0.471211	0.421236	0.446224
LBR	3930	0.336742	0.55556	0.446151
SREK1	140890	0.105072	0.786447	0.445759
PPT2	9374	0.137546	0.753712	0.445629
ATP6V0E1	8992	0.285205	0.605564	0.445385
UBE3D	90025	0.320242	0.568755	0.444499
NUCKS1	64710	0.16186	0.727018	0.444439
RNASE4	6038	0.727902	0.160647	0.444275
WDR3	10885	0.259579	0.628896	0.444238
COPS8	10920	0.196532	0.691663	0.444097
DECR1	1666	0.0711684	0.816793	0.443981
RPA2	6118	0.333501	0.554143	0.443822
TRA2A	29896	0.174096	0.712219	0.443157
ZBTB44	29068	0.379993	0.506303	0.443148
ELL3	80237	0.312358	0.57336	0.442859
RHOA	387	0.300586	0.584634	0.44261
VMP1	81671	0.479997	0.40522	0.442609
ZIC2	7546	0.450554	0.434628	0.442591
TDRD7	23424	0.0767252	0.808251	0.442488
TMEM144	55314	0.151833	0.73279	0.442312
AP2B1	163	0.4055	0.479018	0.442259
STAG2	10735	0.397515	0.486353	0.441934
PHF10	55274	0.593375	0.289179	0.441277
FGFR1OP	11116	0.0760024	0.806471	0.441237
SBF2	81846	0.676683	0.205518	0.441101
PRCP	5547	0.182463	0.699558	0.44101
BROX	148362	0.425659	0.456042	0.44085
WDR75	84128	0.218151	0.663181	0.440666
ACOT9	23597	0.271995	0.608919	0.440457
PIP5K1A	8394	0.286149	0.594579	0.440364
CHD9	80205	0.485073	0.395126	0.440099
PIGN	23556	0.0650456	0.81495	0.439998
NAA16	79612	0.165255	0.714315	0.439785
DLX4	1748	0.606677	0.272279	0.439478
PDS5A	23244	0.314747	0.563563	0.439155
ENDOD1	23052	0.111947	0.766091	0.439019
NPEPPS	9520	0.487613	0.390042	0.438827
WDR12	55759	0.343442	0.533954	0.438698
SEC61G	23480	0.48548	0.391103	0.438292
ARHGAP21	57584	0.589647	0.286236	0.437941
ATP5A1	498	0.0929883	0.781713	0.437351
SLX4IP	128710	0.0710199	0.80359	0.437305
NUP107	57122	0.0686224	0.805928	0.437275
GLS	2744	0.132183	0.742279	0.437231
STIL	6491	0.434729	0.439152	0.43694
ARHGAP42	143872	0.327426	0.546187	0.436807
RAP2A	5911	0.14612	0.727168	0.436644
FAM175A	84142	0.535048	0.338116	0.436582
MTR	4548	0.232993	0.639786	0.436389
RFX3	5991	0.723295	0.149207	0.436251
PPP1CC	5501	0.445564	0.426182	0.435873
HACE1	57531	0.330952	0.540553	0.435752
TFAP2C	7022	0.602461	0.268447	0.435454
PGRMC2	10424	0.404899	0.465997	0.435448
FCHO2	115548	0.264922	0.605241	0.435082
DYRK3	8444	0.143978	0.725725	0.434852
GLRX2	51022	0.168227	0.700859	0.434543
SYTL2	54843	0.0186889	0.849351	0.43402
KIAA1107	23285	0.306639	0.56105	0.433844
RGS17	26575	0.244217	0.623026	0.433622
NEK3	4752	0.309459	0.557408	0.433434
HIATL2	84278	0.14737	0.719391	0.433381
FASTKD1	79675	0.0506545	0.815749	0.433202
RBMS1	5937	0.36587	0.500349	0.433109
NDUFAF2	91942	0.483448	0.382616	0.433032
ZFP90	146198	0.250253	0.615495	0.432874
PIK3R4	30849	0.126293	0.739429	0.432861
FEM1C	56929	0.260618	0.604727	0.432672
TYMS	7298	0.0440003	0.821242	0.432621
PIAS2	9063	0.246249	0.618625	0.432437
SMPDL3A	10924	0.534822	0.329834	0.432328
ATIC	471	0.185655	0.678229	0.431942
EAPP	55837	0.278934	0.58457	0.431752
ASTN2	23245	0.816135	0.0468526	0.431494
MPP5	64398	0.33874	0.523897	0.431319
YTHDC1	91746	0.526126	0.336323	0.431224
KPNB1	3837	0.351378	0.510764	0.431071
FAM96A	84191	0.136581	0.72503	0.430806
SPATA5	166378	0.036855	0.82434	0.430597
FAM92A1	137392	0.597836	0.263334	0.430585
WDR48	57599	0.407519	0.453441	0.43048
UBE2B	7320	0.368444	0.492382	0.430413
FARSB	10056	0.375988	0.484702	0.430345
TUBD1	51174	0.0937025	0.766882	0.430292
ITGA2	3673	0.0796055	0.780969	0.430287
C11orf30	56946	0.199781	0.660728	0.430254
INTS8	55656	0.0959118	0.764435	0.430173
ISCA2	122961	0.0633952	0.796907	0.430151
PAPSS1	9061	0.110474	0.749671	0.430072
GBAS	2631	0.262278	0.597119	0.429699
NDUFS5	4725	0.0227585	0.836256	0.429507
ZNF431	170959	0.304356	0.554616	0.429486
CSTA	1475	0.0152351	0.843637	0.429436
PTPLAD1	51495	0.239982	0.618793	0.429387
AIM1	202	0.502535	0.355674	0.429105
ZNF85	7639	0.151983	0.706144	0.429064
FAM178A	55719	0.15178	0.705946	0.428863
CLK1	1195	0.572675	0.284756	0.428716
RPL24	6152	0.637911	0.219416	0.428663
VPS29	51699	0.053218	0.804102	0.42866
KIAA1429	25962	0.351695	0.505609	0.428652
TRAF5	7188	0.0403786	0.816877	0.428628
TIMP2	7077	0.187683	0.668517	0.4281
ARFGEF1	10565	0.15627	0.69991	0.42809
MSANTD2	79684	0.625133	0.230774	0.427953
SRPK1	6732	0.110547	0.745346	0.427946
RASSF3	283349	0.00649434	0.848488	0.427491
SP4	6671	0.216983	0.637348	0.427165
TMEM245	23731	0.471653	0.382341	0.426997
MICU1	10367	0.397001	0.456942	0.426972
ST13	6767	0.44107	0.412809	0.426939
CPSF3	51692	0.131258	0.722574	0.426916
PANK3	79646	0.401906	0.450838	0.426372
KLHL12	59349	0.296277	0.555727	0.426002
SNX3	8724	0.461376	0.390293	0.425834
MTRNR2L6	100463482	0.802622	0.0481892	0.425406
HSDL1	83693	0.0621275	0.788488	0.425308
IPO5	3843	0.356056	0.494386	0.425221
ATP1B1	481	0.606046	0.244206	0.425126
TTC21B	79809	0.333458	0.516667	0.425062
XRCC5	7520	0.187456	0.661996	0.424726
CNOT2	4848	0.20451	0.644188	0.424349
TAF9	6880	0.31941	0.528967	0.424188
PANK2	80025	0.193655	0.654655	0.424155
NDRG3	57446	0.196812	0.651354	0.424083
PDE6D	5147	0.101103	0.746685	0.423894
KIAA0922	23240	0.0211389	0.826093	0.423616
NEDD8	4738	0.238672	0.60723	0.422951
SLC25A33	84275	0.520897	0.32471	0.422804
SCAPER	49855	0.391011	0.454591	0.422801
ALMS1	7840	0.208614	0.636465	0.42254
FLT1	2321	0.0353673	0.809379	0.422373
PHKB	5257	0.457589	0.386796	0.422193
SYPL1	6856	0.0576447	0.786458	0.422051
MTMR1	8776	0.407734	0.436189	0.421962
PRMT3	10196	0.14129	0.702386	0.421838
MRPS33	51650	0.604877	0.237923	0.4214
PTGR1	22949	0.235591	0.6072	0.421395
CCL28	56477	0.157184	0.684926	0.421055
FHL2	2274	0.152342	0.689274	0.420808
STARD3NL	83930	0.215959	0.622382	0.419171
GNL3	26354	0.387442	0.450806	0.419124
SMC4	10051	0.542304	0.295939	0.419122
SLC35D2	11046	0.55182	0.285848	0.418834
EIF4E2	9470	0.00644315	0.831216	0.41883
LRRC58	116064	0.0339391	0.803463	0.418701
MPV17	4358	0.0437706	0.793122	0.418446
KCTD12	115207	0.252209	0.584576	0.418393
SLC27A2	11001	0.215356	0.620745	0.41805
GCSH	2653	0.119977	0.715959	0.417968
CTR9	9646	0.165049	0.670496	0.417773
PADI2	11240	0.177856	0.657618	0.417737
GCFC2	6936	0.0758195	0.759232	0.417526
RQCD1	9125	0.141133	0.693895	0.417514
ZNF343	79175	0.437786	0.397181	0.417484
ASAP1	50807	0.536114	0.298774	0.417444
PAIP2B	400961	0.543854	0.290633	0.417244
ACADM	34	0.27274	0.561613	0.417177
NIPAL3	57185	0.449598	0.383729	0.416664
ATP5C1	509	0.280436	0.552426	0.416431
LUZP1	7798	0.240605	0.592001	0.416303
RBM7	10179	0.0523402	0.78007	0.416205
CT62	196993	0.0113734	0.820478	0.415926
SF3B1	23451	0.404025	0.427492	0.415759
ZNF519	162655	0.28996	0.541485	0.415722
E2F8	79733	0.0288799	0.802482	0.415681
FBXL5	26234	0.265138	0.565563	0.41535
HBE1	3046	0.792429	0.0378221	0.415126
HESX1	8820	0.597026	0.233115	0.415071
ZBTB10	65986	0.322869	0.506566	0.414717
USP28	57646	0.298673	0.529242	0.413957
EYA3	2140	0.375173	0.451858	0.413515
HSD17B12	51144	0.131244	0.695729	0.413486
GPR89A	653519	0.173501	0.653433	0.413467
RAP1A	5906	0.0764728	0.750092	0.413282
DBF4	10926	0.190123	0.635954	0.413039
ZNF22	7570	0.612844	0.213163	0.413004
ZRANB3	84083	0.327299	0.497385	0.412342
SEC11A	23478	0.685821	0.138564	0.412192
FUNDC2	65991	0.359568	0.463891	0.41173
EFCAB7	84455	0.228134	0.594155	0.411144
LCP1	3936	0.110994	0.711074	0.411034
WHSC1L1	54904	0.387796	0.434268	0.411032
SRGAP2	23380	0.30689	0.513729	0.410309
EIF5B	9669	0.0992292	0.719911	0.40957
AGGF1	55109	0.062195	0.75672	0.409457
MTERF	7978	0.0962036	0.722598	0.409401
ARGLU1	55082	0.21265	0.60601	0.40933
SAAL1	113174	0.14762	0.670569	0.409094
PHF6	84295	0.135343	0.68265	0.408996
MRPL15	29088	0.31768	0.500083	0.408881
PDE3B	5140	0.18242	0.635227	0.408824
TMBIM1	64114	0.188442	0.628689	0.408565
DCAF16	54876	0.272614	0.544483	0.408549
C2orf49	79074	0.354668	0.462344	0.408506
NHLRC3	387921	0.152145	0.664758	0.408452
SOCS5	9655	0.445919	0.370424	0.408171
CCDC117	150275	0.313071	0.503106	0.408089
RPS27A	6233	0.760258	0.0559151	0.408087
PPHLN1	51535	0.149158	0.666738	0.407948
USP48	84196	0.386449	0.42926	0.407855
STBD1	8987	0.262645	0.552077	0.407361
GTF2H2D	730394	0.0502476	0.764352	0.4073
BMI1	648	0.154162	0.659989	0.407076
PIGP	51227	0.725159	0.0885912	0.406875
AGPAT5	55326	0.329625	0.483917	0.406771
NUF2	83540	0.650337	0.162857	0.406597
CDKN2AIP	55602	0.4203	0.392876	0.406588
BCL2	596	0.200722	0.611352	0.406037
APOO	79135	0.0250895	0.786393	0.405741
MTBP	27085	0.125831	0.685646	0.405739
RNF20	56254	0.426484	0.384356	0.40542
ZC2HC1A	51101	0.0980847	0.712605	0.405345
G2E3	55632	0.0252422	0.785414	0.405328
SEC22A	26984	0.375319	0.434962	0.405141
HSPH1	10808	0.00166175	0.808229	0.404946
STX8	9482	0.15779	0.651891	0.404841
CEP135	9662	0.113066	0.696083	0.404574
F11R	50848	0.334937	0.473929	0.404433
CDS2	8760	0.409879	0.398877	0.404378
CSRP2BP	57325	0.118236	0.690514	0.404375
MCU	90550	0.207668	0.601052	0.40436
UBE2D2	7322	0.246175	0.561501	0.403838
CBWD3	445571	0.0641484	0.74335	0.403749
PSMG1	8624	0.142646	0.66447	0.403558
ZNF800	168850	0.158698	0.648016	0.403357
BLMH	642	0.0817769	0.724931	0.403354
ZBED5	58486	0.30828	0.498152	0.403216
ATXN10	25814	0.18166	0.624732	0.403196
CHD1L	9557	0.183934	0.621695	0.402814
POLR1B	84172	0.151019	0.653506	0.402262
MREG	55686	0.242694	0.561442	0.402068
MEAF6	64769	0.221797	0.581822	0.40181
KAT7	11143	0.410198	0.392849	0.401524
EEF1B2	1933	0.69747	0.105454	0.401462
ARMCX6	54470	0.172612	0.629263	0.400938
CYP2U1	113612	0.50309	0.298726	0.400908
RPL30	6156	0.595649	0.206133	0.400891
KLRC2	3822	0.347458	0.453835	0.400647
GLUL	2752	0.174601	0.626413	0.400507
FAM214A	56204	0.434779	0.365317	0.400048
NUDCD1	84955	0.00721338	0.792705	0.399959
UHRF2	115426	0.409309	0.390562	0.399936
PIP4K2A	5305	0.16856	0.631115	0.399837
RAB3B	5865	0.573967	0.225453	0.39971
MBD2	8932	0.464998	0.334326	0.399662
ENPP4	22875	0.0386448	0.760196	0.39942
ZNF436	80818	0.17087	0.627694	0.399282
NSUN6	221078	0.300134	0.497207	0.398671
LRRFIP1	9208	0.244159	0.552867	0.398513
NUDT15	55270	0.106004	0.690619	0.398312
C3orf67	200844	0.365121	0.431251	0.398186
BCKDHB	594	0.389372	0.406849	0.398111
TOPORS	10210	0.153264	0.642939	0.398101
ITM2B	9445	0.228548	0.567395	0.397972
COPS4	51138	0.297729	0.497535	0.397632
SNX16	64089	0.097555	0.697698	0.397627
RAB5B	5869	0.512438	0.282036	0.397237
IPO9	55705	0.0882236	0.706126	0.397175
ARMC8	25852	0.1584	0.635762	0.397081
SMC3	9126	0.417195	0.376449	0.396822
TRIM44	54765	0.302126	0.491383	0.396754
GPN1	11321	0.236415	0.55681	0.396612
CREG1	8804	0.522483	0.270541	0.396512
SLC35B4	84912	0.0467683	0.746121	0.396445
ZNF106	64397	0.300049	0.491734	0.395892
SACS	26278	0.0962886	0.695493	0.395891
CAMTA1	23261	0.176871	0.614571	0.395721
DYNLL1	8655	0.0766972	0.714571	0.395634
GPC5	2262	0.00207103	0.788765	0.395418
RPS4Y1	6192	0.718115	0.0713221	0.394718
TMEM2	23670	0.0263775	0.762137	0.394257
PSMA3	5684	0.0637479	0.724173	0.39396
LEPROT	54741	0.229535	0.558335	0.393935
CLNS1A	1207	0.310794	0.47699	0.393892
PCTP	58488	0.0324143	0.755249	0.393831
DRG1	4733	0.388521	0.399069	0.393795
DCAF17	80067	0.382866	0.404697	0.393782
NABP1	64859	0.311404	0.476028	0.393716
MTF2	22823	0.0403649	0.746912	0.393639
ZNF483	158399	0.471846	0.314885	0.393366
SEH1L	81929	0.160055	0.626492	0.393273
COX5A	9377	0.69343	0.0923091	0.392869
RP2	6102	0.0317897	0.753924	0.392857
POLR2D	5433	0.179621	0.605892	0.392756
GMPS	8833	0.229246	0.555919	0.392583
XPO7	23039	0.360441	0.42466	0.392551
KBTBD2	25948	0.262933	0.522164	0.392548
USP4	7375	0.0953243	0.68953	0.392427
MOAP1	64112	0.193419	0.591258	0.392338
GAN	8139	0.394106	0.390469	0.392287
PHF7	51533	0.306655	0.477694	0.392175
NDUFB5	4711	0.357583	0.426709	0.392146
CFL2	1073	0.0800426	0.704021	0.392032
MYO6	4646	0.245848	0.537623	0.391735
KNSTRN	90417	0.328733	0.454484	0.391608
SSB	6741	0.0459028	0.7372	0.391551
PAQR8	85315	0.0778551	0.704844	0.391349
PREP	5550	0.113722	0.668744	0.391233
FASTKD3	79072	0.219273	0.562644	0.390959
BRWD3	254065	0.365622	0.416176	0.390899
CDC23	8697	0.114333	0.667423	0.390878
IGBP1	3476	0.648038	0.133596	0.390817
GNB4	59345	0.0870912	0.694451	0.390771
UBXN8	7993	0.200208	0.580016	0.390112
RDH14	57665	0.499742	0.280345	0.390044
TMEM123	114908	0.304955	0.475107	0.390031
KANSL2	54934	0.14211	0.637945	0.390028
PAM	5066	0.208423	0.571104	0.389763
BPTF	2186	0.386478	0.393035	0.389757
ITGAE	3682	0.486369	0.292925	0.389647
HMGXB4	10042	0.169117	0.6101	0.389608
FAM98A	25940	0.0198666	0.759117	0.389492
SENP7	57337	0.192038	0.586552	0.389295
TMEM126B	55863	0.129279	0.649234	0.389257
NPHP3	27031	0.316371	0.462078	0.389225
PHOSPHO2	493911	0.0535441	0.724609	0.389076
DDX47	51202	0.447458	0.33065	0.389054
GSTCD	79807	0.0635791	0.714352	0.388966
METTL25	84190	0.104	0.673606	0.388803
DNAJB6	10049	0.568726	0.208442	0.388584
SUMO2	6613	0.345415	0.431262	0.388338
CPM	1368	0.0809252	0.695524	0.388225
CLDND1	56650	0.356714	0.419551	0.388132
EEA1	8411	0.399037	0.376942	0.387989
CKAP5	9793	0.31289	0.462758	0.387824
SPATA24	202051	0.356382	0.419185	0.387784
AP1AR	55435	0.153448	0.621828	0.387638
HMBOX1	79618	0.465949	0.309176	0.387562
UAP1	6675	0.532498	0.242606	0.387552
ADAL	161823	0.337393	0.437468	0.38743
CCDC104	112942	0.345072	0.429673	0.387373
LARP7	51574	0.136434	0.638134	0.387284
C2CD3	26005	0.109947	0.664463	0.387205
FAM83B	222584	0.222515	0.55168	0.387098
GDPD3	79153	0.281901	0.492018	0.38696
DDHD2	23259	0.430328	0.34314	0.386734
MCCC2	64087	0.0303696	0.742519	0.386444
ZNF114	163071	0.114473	0.657854	0.386164
SH3GL3	6457	0.568479	0.203778	0.386129
ATP6V1A	523	0.271196	0.500919	0.386057
ADK	132	0.256823	0.514889	0.385856
ZBTB26	57684	0.404052	0.367347	0.3857
SEC23A	10484	0.362523	0.408657	0.38559
THAP10	56906	0.109955	0.660695	0.385325
OSGEPL1	64172	0.0978902	0.672575	0.385233
DARS	1615	0.380887	0.389355	0.385121
PHC3	80012	0.441065	0.328686	0.384875
CHMP4A	29082	0.0563145	0.713412	0.384863
BRK1	55845	0.426548	0.343065	0.384806
DIXDC1	85458	0.333136	0.436468	0.384802
C14orf119	55017	0.193049	0.575887	0.384468
SCAF11	9169	0.108646	0.660182	0.384414
ZDHHC2	51201	0.224515	0.543977	0.384246
C9orf72	203228	0.390217	0.378102	0.384159
TOMM7	54543	0.518636	0.24949	0.384063
FTO	79068	0.321854	0.4458	0.383827
SMG8	55181	0.180804	0.586787	0.383796
CAPRIN2	65981	0.705981	0.0613122	0.383646
PDK4	5166	0.761902	0.00502088	0.383462
C1D	10438	0.164154	0.602768	0.383461
SCRN1	9805	0.384456	0.382303	0.383379
SLC25A43	203427	0.327402	0.438783	0.383092
SH3YL1	26751	0.260085	0.505794	0.38294
TPR	7175	0.20113	0.564223	0.382676
NT5C3A	51251	0.185947	0.579221	0.382584
KCTD20	222658	0.328428	0.436319	0.382373
ZNF32	7580	0.426615	0.337904	0.382259
FAM47E	100129583	0.349648	0.414609	0.382128
KBTBD3	143879	0.376524	0.387386	0.381955
PAXBP1	94104	0.318582	0.445307	0.381944
RFESD	317671	0.396748	0.36692	0.381834
ADO	84890	0.211902	0.551214	0.381558
SPAG5	10615	0.181266	0.581678	0.381472
DCTN6	10671	0.296776	0.465909	0.381343
MIER1	57708	0.0676448	0.694737	0.381191
NUP133	55746	0.234137	0.52768	0.380908
RHNO1	83695	0.143776	0.618033	0.380904
XPO1	7514	0.224422	0.537062	0.380742
PTPN9	5780	0.368027	0.393236	0.380631
TSG101	7251	0.173204	0.587643	0.380423
TMEM138	51524	0.109408	0.651347	0.380378
PPP1R1C	151242	0.733559	0.0267227	0.380141
RSRC2	65117	0.180792	0.579424	0.380108
CKAP2L	150468	0.574023	0.185579	0.379801
SMN2	6607	0.664706	0.0947501	0.379728
ZNF189	7743	0.0516228	0.707718	0.37967
EME1	146956	0.215568	0.543415	0.379492
C16orf87	388272	0.314458	0.443844	0.379151
LONRF1	91694	0.52588	0.23239	0.379135
FOCAD	54914	0.0245117	0.733547	0.379029
SLC16A10	117247	0.614838	0.142369	0.378603
RBMX	27316	0.34895	0.408074	0.378512
STYXL1	51657	0.184623	0.571581	0.378102
SMN1	6606	0.0129821	0.742994	0.377988
ST6GALNAC5	81849	0.57623	0.179366	0.377798
AASS	10157	0.481721	0.273875	0.377798
CEBPZ	10153	0.274952	0.480642	0.377797
TSPAN6	7105	0.127792	0.627185	0.377489
BBS2	583	0.204446	0.550335	0.377391
ZNF17	7565	0.436557	0.317755	0.377156
SOCS2	8835	0.0508136	0.703397	0.377105
WDPCP	51057	0.246595	0.507604	0.377099
PAK2	5062	0.26658	0.487544	0.377062
GPR19	2842	0.616337	0.137444	0.37689
RAB12	201475	0.348035	0.40567	0.376852
GFM2	84340	0.0406253	0.712564	0.376594
LSM6	11157	0.17205	0.581121	0.376585
BTD	686	0.0396801	0.712945	0.376313
TMEM170A	124491	0.0992071	0.653398	0.376302
NMD3	51068	0.219453	0.533149	0.376301
CEP97	79598	0.00233844	0.75024	0.376289
DTNA	1837	0.260404	0.491817	0.37611
ZW10	9183	0.136526	0.615378	0.375952
NDC80	10403	0.197286	0.554428	0.375857
SNRNP48	154007	0.388066	0.362738	0.375402
OXSR1	9943	0.412176	0.338017	0.375097
IFT80	57560	0.128789	0.62099	0.37489
RARS	5917	0.0655194	0.684113	0.374816
FMR1	2332	0.0896495	0.658441	0.374045
DCUN1D4	23142	0.0267599	0.721297	0.374029
FAAH2	158584	0.412131	0.335228	0.37368
PTBP2	58155	0.227689	0.519572	0.373631
ABCA5	23461	0.474177	0.272276	0.373227
PLEKHA3	65977	0.226602	0.519825	0.373213
TRAPPC3	27095	0.173288	0.573091	0.373189
KLF6	1316	0.268774	0.477261	0.373017
NUP37	79023	0.145882	0.599975	0.372929
RINT1	60561	0.115574	0.630073	0.372823
DHX9	1660	0.0438787	0.701418	0.372648
ATF2	1386	0.234405	0.510818	0.372611
KIAA1009	22832	0.071107	0.674038	0.372573
SLC4A7	9497	0.422404	0.322352	0.372378
FLVCR1	28982	0.176486	0.568156	0.372321
UFC1	51506	0.318619	0.425394	0.372006
FAF1	11124	0.477244	0.266331	0.371788
ZNF132	7691	0.517131	0.225672	0.371402
PRR15L	79170	0.128383	0.614227	0.371305
PEX7	5191	0.0577798	0.684736	0.371258
RNPC3	55599	0.308582	0.433618	0.3711
PPIG	9360	0.135494	0.606572	0.371033
TTC37	9652	0.523285	0.218775	0.37103
ZNF792	126375	0.0893199	0.65257	0.370945
LIFR	3977	0.23214	0.509639	0.370889
HNRNPUL2	221092	0.54348	0.198136	0.370808
KIAA1279	26128	0.169949	0.571647	0.370798
NOC3L	64318	0.188581	0.552969	0.370775
AP1S2	8905	0.432041	0.309447	0.370744
THOC7	80145	0.661705	0.0794531	0.370579
TMEM45B	120224	0.0828985	0.658242	0.37057
MAP6D1	79929	0.093339	0.647267	0.370303
ST7	7982	0.267225	0.472776	0.370001
RSBN1L	222194	0.0619432	0.677847	0.369895
DOCK10	55619	0.00236965	0.737241	0.369805
NFATC3	4775	0.0897759	0.649542	0.369659
MTERFD2	130916	0.0307778	0.70836	0.369569
C3orf38	285237	0.0527411	0.685936	0.369338
SEPSECS	51091	0.325546	0.412288	0.368917
TMEM136	219902	0.342623	0.395164	0.368894
ATP2C1	27032	0.297276	0.440179	0.368728
FER	2241	0.0285125	0.708442	0.368477
FAM83D	81610	0.165107	0.571128	0.368117
SENP8	123228	0.202631	0.533039	0.367835
NMRK1	54981	0.0109529	0.724597	0.367775
SUZ12	23512	0.0375778	0.696009	0.366793
NT5DC3	51559	0.133957	0.599126	0.366541
TBC1D12	23232	0.455359	0.27758	0.36647
POLR1E	64425	0.46856	0.263983	0.366272
PRMT10	90826	0.0688158	0.663727	0.366271
C15orf48	84419	0.171571	0.560363	0.365967
UTRN	7402	0.520683	0.211247	0.365965
RANBP9	10048	0.331926	0.399818	0.365872
MGAT2	4247	0.0322967	0.698734	0.365515
YIPF1	54432	0.0364237	0.694239	0.365331
ZFP69	339559	0.0392079	0.691306	0.365257
GRSF1	2926	0.085828	0.644443	0.365136
BBS4	585	0.419731	0.310445	0.365088
CHCHD4	131474	0.21053	0.519155	0.364842
NUDCD2	134492	0.0825574	0.646801	0.364679
RRAGA	10670	0.39694	0.331822	0.364381
CLMN	79789	0.344219	0.38453	0.364374
PPAPDC2	403313	0.129296	0.599077	0.364186
AKAP7	9465	0.436643	0.291591	0.364117
TOR1AIP1	26092	0.138315	0.589708	0.364012
RICTOR	253260	0.470847	0.256588	0.363717
RTKN2	219790	0.0870071	0.640266	0.363636
GNE	10020	0.278768	0.44841	0.363589
TRAPPC2	6399	0.272104	0.454927	0.363516
BTBD11	121551	0.580471	0.146212	0.363341
NUBPL	80224	0.0447777	0.681871	0.363325
LGALS8	3964	0.386966	0.33963	0.363298
PAQR3	152559	0.0683082	0.65809	0.363199
ERO1L	30001	0.198121	0.527225	0.362673
ANKRD28	23243	0.416984	0.307552	0.362268
ASB3	51130	0.179708	0.544822	0.362265
SLC35A5	55032	0.198278	0.525826	0.362052
NBEA	26960	0.108294	0.615652	0.361973
UBE2D3	7323	0.15559	0.568079	0.361834
DMXL1	1657	0.0819771	0.641629	0.361803
CCT6A	908	0.115667	0.607062	0.361365
PLK1S1	55857	0.582252	0.140457	0.361355
IFNAR1	3454	0.198934	0.523497	0.361215
ROCK2	9475	0.065719	0.656488	0.361104
SCAF8	22828	0.305475	0.416551	0.361013
ZNF182	7569	0.155789	0.565516	0.360653
VSIG10	54621	0.188819	0.532422	0.360621
DIO1	1733	0.0018326	0.719054	0.360443
TMEM56	148534	0.217044	0.503809	0.360427
RIOK1	83732	0.117226	0.603418	0.360322
PARP4	143	0.139004	0.581593	0.360298
MAML2	84441	0.498397	0.221521	0.359959
KCTD7	154881	0.513775	0.205998	0.359887
REN	5972	0.316514	0.403133	0.359824
NEMF	9147	0.0505264	0.66902	0.359773
EIF4G2	1982	0.117495	0.601439	0.359467
SF3A3	10946	0.459751	0.258394	0.359072
TP63	8626	0.00192827	0.715362	0.358645
FUNDC1	139341	0.109258	0.60781	0.358534
L2HGDH	79944	0.0672244	0.649619	0.358422
UBE2C	11065	0.655142	0.0616398	0.358391
USP13	8975	0.351961	0.364648	0.358305
SMC6	79677	0.0930286	0.623578	0.358303
C17orf80	55028	0.262065	0.454373	0.358219
ARHGAP19	84986	0.386058	0.33022	0.358139
KIAA1731	85459	0.357159	0.359115	0.358137
COQ10A	93058	0.49578	0.219824	0.357802
ASCC1	51008	0.179761	0.535707	0.357734
C15orf41	84529	0.242624	0.472743	0.357684
ZNF638	27332	0.198791	0.516342	0.357566
LCA5	167691	0.259473	0.455348	0.357411
PEX2	5828	0.175214	0.539575	0.357395
CIR1	9541	0.5769	0.135712	0.356306
UGT2B15	7366	0.0330186	0.679509	0.356264
EIF2AK3	9451	0.302149	0.41009	0.35612
IQCH	64799	0.435079	0.276586	0.355832
TEX30	93081	0.114449	0.597165	0.355807
MPP6	51678	0.0876329	0.62307	0.355351
UBE4A	9354	0.183283	0.526937	0.35511
SPATA5L1	79029	0.275001	0.435004	0.355003
HECTD2	143279	0.197358	0.512222	0.35479
SEPT10	151011	0.287537	0.422006	0.354771
FMNL2	114793	0.405737	0.303803	0.35477
RAB28	9364	0.199448	0.508428	0.353938
HCAR1	27198	0.00049858	0.707295	0.353897
TDP1	55775	0.187877	0.519846	0.353862
POT1	25913	0.110903	0.596694	0.353799
GTF2E2	2961	0.240842	0.466209	0.353525
CCT8	10694	0.102389	0.604058	0.353223
MCM9	254394	0.058367	0.64719	0.352779
TCAIM	285343	0.348721	0.356753	0.352737
IPMK	253430	0.160604	0.544828	0.352716
MARC2	54996	0.582475	0.122399	0.352437
AKIRIN2	55122	0.505881	0.19857	0.352226
RSPH3	83861	0.236451	0.467469	0.35196
TDRD1	56165	0.00196088	0.701678	0.351819
IQGAP1	8826	0.148884	0.554735	0.35181
TCF24	100129654	0.0862339	0.617295	0.351764
TADA2A	6871	0.149695	0.553357	0.351526
HSPA4L	22824	0.221267	0.481508	0.351388
ATP11C	286410	0.0525583	0.65003	0.351294
ZNF644	84146	0.195672	0.50649	0.351081
GTF3C4	9329	0.296137	0.405856	0.350997
CTDSPL	10217	0.158221	0.543574	0.350897
CAMSAP2	23271	0.145487	0.555817	0.350652
ZNF558	148156	0.0933935	0.607704	0.350549
PCP4	5121	0.0340619	0.666768	0.350415
BNIP3	664	0.17766	0.523065	0.350362
EIF1B	10289	0.246735	0.452541	0.349638
FBXO3	26273	0.427018	0.271745	0.349381
EIF4E3	317649	0.191487	0.507255	0.349371
ZCCHC9	84240	0.239648	0.458837	0.349242
IWS1	55677	0.0393779	0.658346	0.348862
PMS1	5378	0.198844	0.498535	0.34869
PPP3CA	5530	0.0809359	0.616345	0.348641
PRPF4B	8899	0.0371892	0.659943	0.348566
CD63	967	0.000487855	0.696643	0.348566
NBR1	4077	0.641117	0.0557993	0.348458
MED30	90390	0.678471	0.0183856	0.348429
CADPS2	93664	0.0368022	0.660006	0.348404
C12orf66	144577	0.13275	0.563521	0.348136
VDAC1	7416	0.212322	0.483535	0.347929
GYG1	2992	0.408126	0.28767	0.347898
RBM12B	389677	0.28694	0.406969	0.346955
HEATR6	63897	0.14419	0.549401	0.346795
TMLHE	55217	0.150772	0.542396	0.346584
CMPK1	51727	0.193707	0.498827	0.346267
MNS1	55329	0.322376	0.369774	0.346075
TAF2	6873	0.0358706	0.655788	0.345829
ZNF438	220929	0.172363	0.518612	0.345488
PABPC4	8761	0.136124	0.55391	0.345017
JUND	3727	0.202631	0.486984	0.344807
RBMX2	51634	0.197772	0.491771	0.344771
NARG2	79664	0.112856	0.576165	0.344511
FAM172A	83989	0.187886	0.500889	0.344387
AP3M2	10947	0.261178	0.426881	0.344029
SLC46A3	283537	0.141616	0.546352	0.343984
CCDC18	343099	0.301996	0.385825	0.343911
TRPM7	54822	0.249817	0.437744	0.34378
CCDC41	51134	0.0658785	0.621419	0.343649
VCPIP1	80124	0.0973881	0.589574	0.343481
UXT	8409	0.243001	0.443956	0.343478
ABHD10	55347	0.0691599	0.617709	0.343434
TMEM241	85019	0.150749	0.535994	0.343371
SMNDC1	10285	0.104639	0.58196	0.343299
PCMT1	5110	0.0023526	0.684023	0.343188
LYSMD1	388695	0.124072	0.562067	0.34307
MED13L	23389	0.401935	0.283944	0.342939
MSL2	55167	0.298601	0.386911	0.342756
DDX50	79009	0.40262	0.282827	0.342723
DOCK7	85440	0.369189	0.316245	0.342717
C2orf76	130355	0.473419	0.21176	0.342589
SLC38A6	145389	0.00539867	0.679578	0.342489
MRPS17	51373	0.151831	0.533024	0.342428
ETFA	2108	0.0790133	0.605688	0.34235
MAN1A1	4121	0.0399652	0.644571	0.342268
PWWP2A	114825	0.272347	0.41197	0.342159
DKC1	1736	0.165888	0.518423	0.342155
SLC25A16	8034	0.386924	0.296876	0.3419
ZCCHC3	85364	0.341788	0.341978	0.341883
PDP2	57546	0.0691746	0.614582	0.341878
PEX12	5193	0.340631	0.343125	0.341878
MEMO1	51072	0.269903	0.413103	0.341503
LANCL1	10314	0.0663563	0.616349	0.341352
COQ5	84274	0.306197	0.376487	0.341342
FAM134C	162427	0.0637531	0.618618	0.341185
PRPF38B	55119	0.205756	0.47657	0.341163
LINS	55180	0.350725	0.331273	0.340999
TTLL7	79739	0.454337	0.227258	0.340798
RBP7	116362	0.121334	0.559657	0.340495
SMIM13	221710	0.146505	0.533895	0.3402
ZNF107	51427	0.0381266	0.641847	0.339987
MANEA	79694	0.044695	0.634962	0.339828
CHMP5	51510	0.124447	0.554617	0.339532
TTC27	55622	0.128004	0.549948	0.338976
ZBTB1	22890	0.151975	0.525668	0.338822
PHLPP1	23239	0.369066	0.308093	0.33858
METTL3	56339	0.0462974	0.630799	0.338548
PPP4R2	151987	0.0645205	0.611411	0.337966
PPP1R3B	79660	0.383415	0.292505	0.33796
SLC2A14	144195	0.0242756	0.651574	0.337925
POLR2B	5431	0.0382319	0.637163	0.337698
SCUBE2	57758	0.00052659	0.674681	0.337604
ZCCHC6	79670	0.201943	0.473101	0.337522
TOP2A	7153	0.667761	0.00724904	0.337505
FMN1	342184	0.0343166	0.640655	0.337486
RAPGEF6	51735	0.24987	0.424727	0.337298
ZCCHC2	54877	0.265009	0.408098	0.336554
AGO1	26523	0.0386178	0.633756	0.336187
ZNF383	163087	0.347511	0.324687	0.336099
ZNF572	137209	0.0904905	0.581425	0.335958
MIB1	57534	0.0720199	0.599366	0.335693
SCCPDH	51097	0.0240051	0.647274	0.33564
ZNF83	55769	0.442986	0.227933	0.33546
KPNA5	3841	0.287852	0.382569	0.33521
BHLHE41	79365	0.495756	0.174219	0.334987
DDX6	1656	0.240795	0.428942	0.334869
KBTBD7	84078	0.00480445	0.664587	0.334696
ARPC3	10094	0.0633327	0.605232	0.334282
SCYL3	57147	0.358681	0.30984	0.33426
SENP1	29843	0.190666	0.476799	0.333732
CWF19L2	143884	0.126002	0.540537	0.33327
ZNF20	7568	0.16932	0.497096	0.333208
CMBL	134147	0.343441	0.321883	0.332662
AP3M1	26985	0.110153	0.554761	0.332457
ZNF57	126295	0.310817	0.353926	0.332372
C4orf29	80167	0.0956952	0.568402	0.332049
DROSHA	29102	0.0670517	0.596963	0.332007
OPTN	10133	0.327424	0.33631	0.331867
GALNT3	2591	0.387458	0.276033	0.331746
HHEX	3087	0.102719	0.560581	0.33165
DIRC2	84925	0.217673	0.444898	0.331285
GLE1	2733	0.0947913	0.567498	0.331145
DHX32	55760	0.0695343	0.592153	0.330844
DDX60L	91351	0.238291	0.423249	0.33077
PARP16	54956	0.336138	0.32534	0.330739
SARNP	84324	0.28783	0.372994	0.330412
GTDC1	79712	0.0803981	0.580398	0.330398
GPBP1L1	60313	0.262199	0.397985	0.330092
RYK	6259	0.33528	0.324556	0.329918
BAZ1A	11177	0.1873	0.472527	0.329913
SUGT1	10910	0.210809	0.447938	0.329373
TBC1D15	64786	0.276019	0.382721	0.32937
NSMCE2	286053	0.376961	0.280305	0.328633
CCNI	10983	0.579364	0.077765	0.328565
CHMP4C	92421	0.365052	0.291857	0.328455
GARNL3	84253	0.274808	0.381947	0.328377
NETO2	81831	0.217173	0.43958	0.328376
YY1AP1	55249	0.399872	0.256765	0.328319
GPHN	10243	0.588466	0.0681459	0.328306
FOXN2	3344	0.0765057	0.580032	0.328269
NECAP1	25977	0.285621	0.370363	0.327992
CLPX	10845	0.12974	0.526057	0.327898
USP39	10713	0.0554557	0.598858	0.327157
EMB	133418	0.019859	0.633919	0.326889
C1orf21	81563	0.211479	0.442282	0.326881
ATP13A3	79572	0.181042	0.472709	0.326875
DSC3	1825	0.644944	0.00874963	0.326847
TSR1	55720	0.255735	0.397762	0.326748
ZDHHC23	254887	0.132053	0.521307	0.32668
KCNE2	9992	0.448434	0.204507	0.326471
ASH1L	55870	0.578682	0.0738166	0.326249
MALT1	10892	0.0827856	0.569638	0.326212
EBLN2	55096	0.421456	0.230847	0.326151
C4orf32	132720	0.291334	0.360887	0.32611
HCFC2	29915	0.215307	0.436546	0.325926
GOLPH3L	55204	0.350041	0.301356	0.325699
CNOT6L	246175	0.304295	0.346817	0.325556
OTUD4	54726	0.132665	0.517694	0.32518
PDE8A	5151	0.345225	0.305098	0.325162
MAPK14	1432	0.184333	0.465928	0.325131
IQCD	115811	0.357015	0.293109	0.325062
LRRC40	55631	0.0714537	0.578237	0.324846
MAP4K3	8491	0.0119654	0.637387	0.324676
CWC22	57703	0.293218	0.355983	0.324601
CEPT1	10390	0.334271	0.314334	0.324303
PPP1R21	129285	0.0932472	0.555289	0.324268
ALDH9A1	223	0.0321675	0.615697	0.323932
GCC2	9648	0.396085	0.251157	0.323621
VWDE	221806	0.488503	0.158512	0.323507
ATP6V0A4	50617	0.143574	0.503074	0.323324
MID1	4281	0.473194	0.173275	0.323235
THRAP3	9967	0.213464	0.432978	0.323221
BTBD1	53339	0.154363	0.49207	0.323216
CNIH4	29097	0.354111	0.291354	0.322732
TMEM50A	23585	0.0623283	0.583078	0.322703
TEC	7006	0.294522	0.350724	0.322623
AEBP2	121536	0.462795	0.182004	0.322399
CDC14B	8555	0.14805	0.496727	0.322389
CDV3	55573	0.27557	0.368797	0.322183
KMT2E	55904	0.531869	0.112142	0.322005
HDHD2	84064	0.155195	0.488741	0.321968
ZNF554	115196	0.389583	0.253796	0.321689
TBC1D23	55773	0.276944	0.366192	0.321568
TRAM1	23471	0.0942534	0.548865	0.321559
ZC3H13	23091	0.0878279	0.555092	0.32146
VPS35	55737	0.243857	0.399021	0.321439
ZNF101	94039	0.288467	0.354231	0.321349
SGMS2	166929	0.512021	0.130588	0.321305
SNAP23	8773	0.384715	0.257782	0.321249
ACBD7	414149	0.25785	0.384598	0.321224
PKD2	5311	0.194187	0.448107	0.321147
UPF2	26019	0.17098	0.47068	0.32083
MCCC1	56922	0.284028	0.357512	0.32077
ZNF410	57862	0.0939053	0.547476	0.320691
HOXC8	3224	0.243431	0.397027	0.320229
UBA2	10054	0.306745	0.3333	0.320023
ZCCHC7	84186	0.537749	0.102045	0.319897
DCAF13	25879	0.312656	0.327096	0.319876
ZNF586	54807	0.277193	0.362175	0.319684
HIBCH	26275	0.0878329	0.551367	0.3196
ZNF41	7592	0.00961469	0.629381	0.319498
ZBED6	100381270	0.39289	0.245615	0.319252
SMARCC1	6599	0.0825368	0.555911	0.319224
UBC	7316	0.311383	0.326674	0.319028
VAMP3	9341	0.079076	0.558975	0.319026
RNF39	80352	0.502765	0.134808	0.318786
CCDC68	80323	0.489614	0.147574	0.318594
PURB	5814	0.141986	0.495073	0.318529
WRN	7486	0.236143	0.400414	0.318279
MRPL45	84311	0.551399	0.0849014	0.31815
LTN1	26046	0.325167	0.311003	0.318085
EIF4A3	9775	0.176899	0.45916	0.31803
CCDC43	124808	0.0953948	0.540434	0.317914
ILF2	3608	0.171186	0.464069	0.317627
PIKFYVE	200576	0.258596	0.37661	0.317603
TOP1	7150	0.491149	0.143709	0.317429
CLN5	1203	0.34063	0.294051	0.317341
LRIG3	121227	0.145563	0.489019	0.317291
TCTA	6988	0.164233	0.469677	0.316955
UGT8	7368	0.276836	0.356724	0.31678
PRKAG1	5571	0.0647707	0.568754	0.316762
BTN3A2	11118	0.248121	0.385206	0.316664
KDM1A	23028	0.224303	0.408921	0.316612
FRRS1	391059	0.172767	0.46028	0.316524
AHCTF1	25909	0.120766	0.511592	0.316179
RBPJ	3516	0.137397	0.494707	0.316052
ZNF654	55279	0.262625	0.369462	0.316043
DNTTIP2	30836	0.115554	0.51569	0.315622
NT5DC1	221294	0.104957	0.526231	0.315594
NANP	140838	0.15887	0.472091	0.31548
GNPAT	8443	0.155903	0.475041	0.315472
THOC1	9984	0.228471	0.402139	0.315305
ALDH1A3	220	0.547398	0.0831744	0.315286
HEATR1	55127	0.118916	0.511489	0.315203
PHIP	55023	0.222434	0.407651	0.315042
ZFP69B	65243	0.0584832	0.571387	0.314935
ZNF273	10793	0.0118574	0.61788	0.314869
NUP54	53371	0.174803	0.454924	0.314864
ZADH2	284273	0.0544146	0.575278	0.314846
PERP	64065	0.521389	0.108266	0.314828
RANBP6	26953	0.16376	0.465559	0.314659
SC5D	6309	0.147031	0.48176	0.314395
EBPL	84650	0.457625	0.170397	0.314011
VDAC2	7417	0.414093	0.213783	0.313938
FAM229B	619208	0.525991	0.101822	0.313906
FHL1	2273	0.395674	0.231618	0.313646
KIFAP3	22920	0.158382	0.468813	0.313597
SLC7A6OS	84138	0.0369711	0.58994	0.313455
ZNF782	158431	0.209066	0.41742	0.313243
FBXO15	201456	0.303715	0.322567	0.313141
SMIM8	57150	0.0362059	0.590048	0.313127
MLF1	4291	0.00585031	0.61979	0.31282
DEGS1	8560	0.203673	0.421722	0.312697
ZFP30	22835	0.109601	0.515388	0.312495
CEP57L1	285753	0.162001	0.462909	0.312455
RMND1	55005	0.214221	0.410274	0.312247
ASB8	140461	0.139649	0.484649	0.312149
ARHGEF6	9459	0.153225	0.471022	0.312124
TBK1	29110	0.0368833	0.587124	0.312003
ASNSD1	54529	0.150453	0.473501	0.311977
SUCO	51430	0.126732	0.497176	0.311954
ERBB2IP	55914	0.137099	0.486618	0.311859
KBTBD6	89890	0.00137558	0.622223	0.311799
PJA2	9867	0.200188	0.423349	0.311769
RBM43	375287	0.186453	0.436775	0.311614
SCAI	286205	0.27983	0.343338	0.311584
SEC24B	10427	0.42651	0.196644	0.311577
HPSE	10855	0.149561	0.47344	0.3115
AHI1	54806	0.425086	0.197643	0.311365
B4GALT6	9331	0.0926485	0.52975	0.311199
ALG9	79796	0.31415	0.307299	0.310724
EFHC1	114327	0.217206	0.404014	0.31061
URI1	8725	0.222947	0.398267	0.310607
JMJD1C	221037	0.423228	0.197933	0.310581
ANKIB1	54467	0.0977838	0.523199	0.310491
ZNF254	9534	0.235987	0.384957	0.310472
PTAR1	375743	0.278454	0.341847	0.310151
FKBP7	51661	0.208748	0.411488	0.310118
BTRC	8945	0.27867	0.341379	0.310024
UFSP2	55325	0.10049	0.519325	0.309908
CASC4	113201	0.115272	0.504243	0.309757
THUMPD2	80745	0.249597	0.369835	0.309716
KIAA0586	9786	0.102541	0.516489	0.309515
TMEM62	80021	0.121952	0.496669	0.309311
PTPN14	5784	0.422452	0.195772	0.309112
METTL21B	25895	0.186319	0.431717	0.309018
BAG4	9530	0.137384	0.480574	0.308979
GNAQ	2776	0.0535294	0.563992	0.308761
HHLA3	11147	0.387817	0.229633	0.308725
CS	1431	0.367743	0.249692	0.308718
FAM21B	55747	0.0165077	0.600615	0.308561
IKZF5	64376	0.327824	0.289065	0.308445
SNRPB2	6629	0.127008	0.489838	0.308423
MXI1	4601	0.265508	0.351199	0.308354
DIEXF	27042	0.550921	0.0651999	0.30806
NKRF	55922	0.172191	0.443548	0.30787
ENTPD1	953	0.0208313	0.592584	0.306708
PEG10	23089	0.606283	0.00668309	0.306483
STMND1	401236	0.19129	0.421468	0.306379
GLOD4	51031	0.194537	0.418007	0.306272
NSUN3	63899	0.139793	0.472546	0.30617
ZNF207	7756	0.0327201	0.579109	0.305915
SLC25A3	5250	0.191105	0.420304	0.305705
GABARAPL1	23710	0.371056	0.240246	0.305651
NOL10	79954	0.147375	0.463891	0.305633
BBS10	79738	0.186421	0.424541	0.305481
PAK1	5058	0.553688	0.057179	0.305433
PPP1R12B	4660	0.423275	0.187369	0.305322
ZNF354B	117608	0.0796143	0.530888	0.305251
COPZ1	22818	0.483817	0.126574	0.305195
PLAG1	5324	0.596607	0.01282	0.304714
FAM149B1	317662	0.274339	0.334838	0.304589
PNRC1	10957	0.564746	0.0436854	0.304216
KIAA1328	57536	0.310838	0.297512	0.304175
BTBD10	84280	0.33582	0.271301	0.303561
FAM21C	253725	0.0651415	0.541625	0.303384
COIL	8161	0.0411909	0.565145	0.303168
NF1	4763	0.352261	0.253945	0.303103
SPAST	6683	0.0298571	0.575589	0.302723
SP3	6670	0.156778	0.448566	0.302672
WNT16	51384	0.483147	0.121935	0.302541
PPAPDC1B	84513	0.424648	0.180332	0.30249
ADCY1	107	0.00283788	0.602013	0.302426
C17orf67	339210	0.246586	0.358156	0.302371
BCLAF1	9774	0.116721	0.487737	0.302229
ZNF430	80264	0.0591629	0.545276	0.302219
PLCB1	23236	0.0282439	0.575667	0.301956
ARMC10	83787	0.136877	0.466851	0.301864
DNAJC8	22826	0.0218577	0.581267	0.301562
DDX17	10521	0.418462	0.184585	0.301523
HOXA13	3209	0.569117	0.0337476	0.301432
FABP3	2170	0.357168	0.245593	0.30138
CRISP3	10321	0.0116714	0.591063	0.301367
SLC35F3	148641	0.596463	0.00578219	0.301123
FAM110C	642273	0.426545	0.174901	0.300723
SLC39A10	57181	0.305089	0.296093	0.300591
TBL1XR1	79718	0.295698	0.305402	0.30055
RABGGTB	5876	0.380646	0.220301	0.300474
TEX14	56155	0.0479387	0.552972	0.300455
POGLUT1	56983	0.249766	0.350726	0.300246
DPAGT1	1798	0.315093	0.285192	0.300143
DDX18	8886	0.32013	0.279847	0.299989
ZNF124	7678	0.063338	0.536224	0.299781
DNAJC21	134218	0.294407	0.304868	0.299637
ACAT1	38	0.0903767	0.508698	0.299537
STAG1	10274	0.138594	0.460428	0.299511
GLO1	2739	0.229107	0.369907	0.299507
HECA	51696	0.360131	0.23884	0.299486
CEP192	55125	0.187787	0.409489	0.298638
TMEM170B	100113407	0.283713	0.312965	0.298339
HDAC1	3065	0.00789551	0.588645	0.29827
CYP2J2	1573	0.142354	0.453664	0.298009
MAK16	84549	0.137029	0.458904	0.297966
NDUFS2	4720	0.240114	0.355808	0.297961
TMEM66	51669	0.359606	0.236311	0.297959
CCDC6	8030	0.171741	0.423789	0.297765
HSF2	3298	0.190032	0.405091	0.297562
KDM5A	5927	0.214023	0.38108	0.297551
RPS6KA5	9252	0.207512	0.387005	0.297258
FAN1	22909	0.209194	0.385299	0.297247
HERC5	51191	0.188153	0.406322	0.297238
SNX2	6643	0.164454	0.429843	0.297149
BRMS1L	84312	0.0622067	0.53113	0.296668
DENND2C	163259	0.318775	0.274354	0.296564
GPR180	160897	0.0823739	0.510406	0.29639
ETFDH	2110	0.033999	0.558328	0.296164
PUS3	83480	0.417896	0.174348	0.296122
VWA8	23078	0.182426	0.409778	0.296102
THAP9	79725	0.383308	0.208684	0.295996
AMOTL1	154810	0.231573	0.360393	0.295983
CDCA7L	55536	0.381029	0.210621	0.295825
UBE2V1	7335	0.507353	0.0841648	0.295759
[truncated: 8,271 more rows]

## Sheet: S1C.Proteins
Gene_Symbol	Entre_Gene_ID	Log2_Fold_Change_HCT116	Log2_Fold_Change_MCF7	Log2_Fold_Change_Average
KDELR1	10945	0.68101	8.84845	4.76473
PPP4R4	57718	1.05268	8.24387	4.64828
AKR1C2	1646	2.50499	5.17516	3.84007
STON2	85439	0.456499	6.68989	3.57319
F5	2153	1.50632	5.30835	3.40734
OSTC	58505	0.923565	5.84089	3.38223
OASL	8638	1.82404	4.55142	3.18773
SP100	6672	0.75731	5.45395	3.10563
PLIN2	123	0.628725	5.56639	3.09756
TYMP	1890	0.483363	5.6388	3.06108
TAP2	6891	0.787609	5.2231	3.00536
APOB	338	2.83816	3.07548	2.95682
TAPBP	6892	1.26536	4.56527	2.91531
FTL	2512	4.64173	0.993665	2.8177
FDFT1	2222	2.87397	2.71173	2.79285
PRELID1	27166	1.44083	4.13573	2.78828
ANKRD34C	390616	1.09271	4.25701	2.67486
SCD	6319	2.76225	2.5339	2.64808
NOS3	4846	0.455357	4.66819	2.56177
HM13	81502	2.30264	2.7945	2.54857
ATP6V0C	527	1.18832	3.83867	2.5135
KRT1	3848	0.153306	4.78832	2.47081
MAP1LC3B2	643246	3.65846	1.26237	2.46041
SERPINC1	462	0.401256	4.5032	2.45223
ISG15	9636	0.871988	3.99698	2.43449
AKR1C3	8644	2.59017	2.2529	2.42154
C19orf66	55337	0.825333	3.82727	2.3263
SRPX	8406	1.57262	3.04115	2.30689
SCIN	85477	0.474368	4.11822	2.29629
TAP1	6890	0.617155	3.97109	2.29412
HERC5	51191	1.72025	2.85399	2.28712
TMED2	10959	1.9631	2.60059	2.28184
GDF15	9518	0.649653	3.81018	2.22991
CD63	967	1.93518	2.52021	2.2277
SAMD9	54809	0.834424	3.61264	2.22353
SQLE	6713	1.9104	2.49992	2.20516
KRT9	3857	0.0549922	4.30305	2.17902
PURB	5814	1.21072	3.06765	2.13918
LDLR	3949	0.919884	3.32645	2.12317
STX3	6809	1.99904	2.22694	2.11299
PTTG1IP	754	1.42834	2.76616	2.09725
PLG	5340	3.67014	0.465993	2.06807
GM2A	2760	3.28103	0.813671	2.04735
TRIM21	6737	1.08923	2.99954	2.04439
MOSPD1	56180	3.59683	0.417677	2.00725
ZNF462	58499	0.60694	3.39924	2.00309
CLU	1191	2.40311	1.59701	2.00006
GRN	2896	0.494694	3.49102	1.99286
PDIA5	10954	3.36834	0.563033	1.96568
GNG5	2787	2.13099	1.77399	1.95249
TIMP2	7077	2.49771	1.38732	1.94251
BET1	10282	1.30256	2.57701	1.93978
AGRN	375790	2.09398	1.76971	1.93185
FLG2	388698	0.0935031	3.72568	1.90959
PRKAR2B	5577	1.77614	2.02905	1.9026
ICAM1	3383	2.48246	1.31618	1.89932
ISG20	3669	1.25203	2.52173	1.88688
CTSA	5476	1.90924	1.84334	1.87629
NMI	9111	0.0518796	3.67431	1.8631
APOL2	23780	0.0978736	3.61759	1.85773
SERINC5	256987	0.693116	3.01695	1.85503
TPP1	1200	2.27703	1.37863	1.82783
SQSTM1	8878	0.422599	3.22219	1.8224
ABAT	18	0.543555	3.07293	1.80824
RRAS	6237	3.33153	0.283532	1.80753
CD59	966	2.57523	1.0279	1.80156
SLFN5	162394	0.886106	2.66712	1.77662
NFYB	4801	0.649882	2.89939	1.77463
LAMB1	3912	1.84263	1.66889	1.75576
KRT14	3861	0.101993	3.40387	1.75293
SLC6A14	11254	0.782377	2.7193	1.75084
DHCR24	1718	1.77713	1.7244	1.75077
DHRS3	9249	0.57906	2.92161	1.75033
CALU	813	2.90036	0.596778	1.74857
VKORC1	79001	1.10523	2.37416	1.73969
DNAJB9	4189	2.00953	1.42575	1.71764
IDI1	3422	1.8005	1.60486	1.70268
WWC3	55841	1.32677	2.07584	1.70131
PON2	5445	1.88008	1.51724	1.69866
SOD2	6648	1.13713	2.2595	1.69831
LIPA	3988	1.78707	1.60443	1.69575
SCARB2	950	1.96136	1.3946	1.67798
CD47	961	0.0945285	3.21017	1.65235
KRT16	3868	0.459094	2.83381	1.64645
SYTL2	54843	1.19063	2.07253	1.63158
PDIA6	10130	0.837808	2.39042	1.61412
HELZ2	85441	0.58582	2.63538	1.6106
CLTB	1212	1.26989	1.94832	1.60911
TIMP1	7076	2.99888	0.206303	1.60259
APLP2	334	2.31045	0.868684	1.58957
GNPDA1	10007	2.21654	0.960911	1.58872
TMEM208	29100	0.91481	2.26222	1.58851
SAMHD1	25939	0.106992	3.06934	1.58817
CYP20A1	57404	1.83969	1.32897	1.58433
EIF4A2	1974	2.22709	0.939829	1.58346
APH1A	51107	2.31065	0.854225	1.58244
PTPLB	201562	0.505148	2.65307	1.57911
STX12	23673	1.60599	1.54879	1.57739
COX6C	1345	0.580863	2.56795	1.5744
SPINT1	6692	2.84943	0.294126	1.57178
RNF13	11342	1.62105	1.50569	1.56337
RAI14	26064	0.918667	2.18641	1.55254
RFTN1	23180	0.613848	2.48527	1.54956
PML	5371	0.611245	2.48433	1.54779
ACSL1	2180	1.8287	1.25905	1.54387
ACAD11	84129	2.94736	0.12826	1.53781
CTSL	1514	1.72042	1.34906	1.53474
TNFRSF12A	51330	0.80318	2.25898	1.53108
LAMP1	3916	1.00626	2.0393	1.52278
SLC25A44	9673	2.70096	0.340704	1.52083
NBR1	4077	1.16214	1.86837	1.51526
MBOAT1	154141	0.57689	2.44636	1.51162
PLD1	5337	1.36094	1.63871	1.49982
UQCRB	7381	1.15968	1.83704	1.49836
NDUFS5	4725	1.34254	1.64131	1.49192
MVP	9961	1.17642	1.80653	1.49148
CLGN	1047	1.63126	1.34405	1.48765
SLC25A4	291	2.93694	0.034095	1.48552
LSS	4047	0.821157	2.1449	1.48303
GBP2	2634	1.16542	1.79315	1.47928
DLD	1738	1.10721	1.83798	1.47259
SQRDL	58472	2.4132	0.514996	1.4641
OPTN	10133	0.874718	2.04108	1.4579
GALNT3	2591	2.57192	0.341943	1.45693
FUNDC2	65991	0.865224	2.0395	1.45236
TMC4	147798	1.60646	1.29693	1.4517
KRT75	9119	0.664869	2.23047	1.44767
SEMA3C	10512	1.56841	1.3131	1.44076
PSAP	5660	1.66509	1.21331	1.4392
IL10RB	3588	1.35564	1.50442	1.43003
GPR107	57720	0.766134	2.09356	1.42985
TAX1BP1	8887	1.3675	1.48692	1.42721
ZDHHC9	51114	0.616712	2.23649	1.4266
UGCG	7357	2.04654	0.804231	1.42538
POR	5447	1.02568	1.8061	1.41589
CD55	1604	2.53612	0.291909	1.41402
BNIP3L	665	2.51149	0.310795	1.41114
LPCAT3	10162	0.892873	1.91885	1.40586
DHCR7	1717	1.58575	1.22083	1.40329
CRELD1	78987	1.09293	1.70727	1.4001
MFSD1	64747	0.561361	2.22899	1.39517
YIF1A	10897	1.69155	1.08446	1.388
CSRP3	8048	0.658009	2.10676	1.38238
SMAD3	4088	2.13485	0.609	1.37193
DLST	1743	0.923928	1.81753	1.37073
TTC14	151613	0.0937621	2.64619	1.36998
MLEC	9761	1.57226	1.14702	1.35964
MIER1	57708	1.79919	0.9187	1.35894
NDUFB7	4713	0.32981	2.38494	1.35737
HMGCS1	3157	1.93145	0.779145	1.3553
SFXN3	81855	1.82145	0.887129	1.35429
TSPAN13	27075	1.05059	1.65169	1.35114
TM9SF2	9375	1.09507	1.59481	1.34494
WFS1	7466	0.644931	2.04017	1.34255
ABCA3	21	0.9072	1.77491	1.34105
GNS	2799	1.41923	1.26266	1.34094
ARL8B	55207	1.00117	1.67949	1.34033
EMC4	51234	0.608794	2.06516	1.33698
GABARAPL2	11345	2.49077	0.175704	1.33324
SYVN1	84447	0.789089	1.87025	1.32967
PAPSS2	9060	1.41193	1.24313	1.32753
SRPRB	58477	0.919095	1.72834	1.32372
VPS13A	23230	1.54925	1.09676	1.323
TWSG1	57045	0.318386	2.32736	1.32287
TIMELESS	8914	0.330468	2.31266	1.32156
ELOVL6	79071	0.801591	1.83176	1.31668
PODXL	5420	0.312222	2.32017	1.3162
IFI30	10437	0.89403	1.73238	1.3132
PEX11A	8800	0.327141	2.2835	1.30532
TMED3	23423	1.00651	1.59812	1.30232
NDUFB3	4709	1.54005	1.06181	1.30093
PGM2L1	283209	1.16028	1.42113	1.2907
GTF2H4	2968	1.17671	1.40068	1.2887
TM7SF2	7108	1.30787	1.26809	1.28798
SDCBP	6386	1.56765	1.00539	1.28652
TRIM16	10626	0.60413	1.96305	1.28359
FRK	2444	1.45532	1.1117	1.28351
S100A8	6279	0.0502576	2.51624	1.28325
YIPF3	25844	0.779682	1.7804	1.28004
DPAGT1	1798	0.0365724	2.50875	1.27266
HMGA1	3159	1.60142	0.943178	1.2723
NUCB2	4925	1.36623	1.17729	1.27176
AGK	55750	1.46342	1.07228	1.26785
SDC4	6385	1.95687	0.570413	1.26364
MARCH5	54708	0.682872	1.84072	1.2618
OSBP2	23762	1.43284	1.08941	1.26112
BAHD1	22893	0.745291	1.77605	1.26067
HSPG2	3339	0.99679	1.52345	1.26012
GPC1	2817	1.37647	1.12925	1.25286
ABLIM2	84448	1.31968	1.18516	1.25242
RAB27B	5874	1.15837	1.34151	1.24994
SLC25A20	788	1.56846	0.931051	1.24976
ATP5E	514	1.52211	0.968073	1.24509
RAB2B	84932	2.35738	0.113544	1.23546
GCH1	2643	2.36073	0.106611	1.23367
PI4K2A	55361	1.47128	0.985911	1.2286
RELB	5971	0.906882	1.53432	1.2206
MTCH2	23788	1.50412	0.931804	1.21796
RTN1	6252	0.860373	1.56445	1.21241
TM9SF4	9777	1.09506	1.3297	1.21238
SFXN1	94081	1.24737	1.16119	1.20428
ST14	6768	0.177194	2.21469	1.19594
COL18A1	80781	1.11799	1.26823	1.19311
C14orf1	11161	0.846912	1.53904	1.19297
ATP6AP1	537	0.601102	1.77517	1.18814
TSPAN6	7105	1.09996	1.27197	1.18597
AGPAT9	84803	1.45117	0.920656	1.18591
LRPAP1	4043	1.66324	0.707177	1.18521
HSPB8	26353	1.21524	1.14964	1.18244
FDX1	2230	2.24056	0.120135	1.18035
TMEM55B	90809	0.792884	1.56229	1.17759
ARL8A	127829	1.0654	1.28234	1.17387
GLG1	2734	2.24929	0.0958339	1.17256
ADA	100	1.93118	0.409179	1.17018
GUSB	2990	1.34066	0.993354	1.16701
TMEM97	27346	0.181596	2.14325	1.16242
DIRC2	84925	1.01258	1.3113	1.16194
DYNLL2	140735	1.79708	0.523581	1.16033
FAM174B	400451	0.201197	2.11899	1.1601
LDHD	197257	1.85266	0.459116	1.15589
ATP2A2	488	1.40152	0.908467	1.15499
REEP3	221035	1.44862	0.860823	1.15472
RAB43	339122	1.0719	1.23132	1.15161
ADAR	103	1.14359	1.15407	1.14883
STX4	6810	0.848628	1.44154	1.14508
ITM2B	9445	0.647211	1.63554	1.14137
NPC2	10577	2.09336	0.184448	1.1389
ATP6V0A1	535	0.877509	1.39952	1.13851
DLGAP4	22839	2.05125	0.22499	1.13812
ARMCX2	9823	0.921036	1.34817	1.1346
LMCD1	29995	1.57542	0.693349	1.13438
WDR25	79446	0.755789	1.51153	1.13366
TMEM199	147007	0.611345	1.65328	1.13231
CTSC	1075	1.81198	0.451252	1.13162
POFUT2	23275	1.53152	0.726294	1.12891
SYPL1	6856	0.0808203	2.17273	1.12678
NDUFB5	4711	1.18088	1.07066	1.12577
TNFRSF10B	8795	1.08766	1.16118	1.12442
RALGAPA2	57186	0.339758	1.90742	1.12359
SEC61A1	29927	0.680594	1.56118	1.12089
TBX2	6909	0.483502	1.75808	1.12079
GOLGA7	51125	1.4309	0.802793	1.11684
RPN2	6185	0.667923	1.56503	1.11647
SLC25A3	5250	1.95743	0.268619	1.11302
SLC39A7	7922	1.13176	1.08984	1.1108
HLA-E	3133	0.224187	1.99705	1.11062
KDSR	2531	1.34593	0.865428	1.10568
ERLEC1	27248	1.91898	0.292077	1.10553
C19orf70	125988	0.200466	2.00546	1.10296
SEZ6L2	26470	0.805181	1.39892	1.10205
PPM1L	151742	1.57843	0.61482	1.09662
APMAP	57136	0.896562	1.29449	1.09552
APOD	347	0.656001	1.53418	1.09509
CD276	80381	0.189779	1.99987	1.09483
LIMA1	51474	1.22979	0.959314	1.09455
GPC4	2239	0.590866	1.58719	1.08903
TMF1	7110	1.6421	0.531439	1.08677
ACP2	53	1.54837	0.622293	1.08533
METTL7A	25840	0.103194	2.06319	1.08319
CERS5	91012	0.752612	1.41347	1.08304
DKK1	22943	1.86824	0.293057	1.08065
ANKRD46	157567	1.21807	0.936267	1.07717
ITPR1	3708	1.78681	0.365043	1.07593
SESTD1	91404	0.855272	1.28416	1.06972
ZDHHC13	54503	1.55073	0.578489	1.06461
TXN2	25828	0.632144	1.49466	1.0634
PNPLA2	57104	2.00349	0.115678	1.05958
MYO18A	399687	0.611989	1.50379	1.05789
BLZF1	8548	1.89277	0.220808	1.05679
HMOX2	3163	1.64248	0.470747	1.05661
MYADM	91663	0.308259	1.80032	1.05429
AKAP8L	26993	1.83148	0.269202	1.05034
PLBD2	196463	1.54716	0.547305	1.04723
NDUFB11	54539	0.785177	1.2963	1.04074
TMEM120A	83862	0.637368	1.44226	1.03981
C16orf58	64755	0.791246	1.28291	1.03708
PTDSS1	9791	0.686835	1.38318	1.03501
RRAGB	10325	0.949156	1.11947	1.03431
PTPN1	5770	0.591491	1.47225	1.03187
PREB	10113	1.06983	0.992583	1.03121
UPP1	7378	0.0256773	2.03649	1.03108
OCIAD2	132299	1.04671	1.01164	1.02918
TMEM43	79188	0.697784	1.35955	1.02867
LEPROTL1	23484	0.788335	1.26537	1.02685
HSDL1	83693	2.04415	0.00855946	1.02635
CTSD	1509	0.813045	1.22944	1.02124
AIFM2	84883	0.784355	1.25473	1.01954
RAB18	22931	0.900215	1.13655	1.01838
PIKFYVE	200576	0.692842	1.33571	1.01428
CMAS	55907	1.83076	0.194712	1.01274
TMEM192	201931	1.40137	0.619565	1.01047
SLC27A2	11001	0.526531	1.49355	1.01004
WDR34	89891	1.63115	0.388395	1.00977
NFKB2	4791	1.06246	0.950558	1.00651
CYP51A1	1595	0.821941	1.15939	0.990668
MYH10	4628	1.26019	0.718108	0.98915
RDH11	51109	1.49044	0.482145	0.986291
MGAT5	4249	1.28087	0.685965	0.983415
GDPD1	284161	1.58368	0.371751	0.977716
CHCHD3	54927	1.08	0.868737	0.974368
MTX2	10651	1.82005	0.12686	0.973457
MESDC2	23184	0.491555	1.4511	0.971329
PLCD1	5333	1.50674	0.431045	0.968894
LMAN1	3998	1.47284	0.461404	0.967124
BDH2	56898	1.63359	0.299825	0.966707
YWHAG	7532	0.724814	1.20247	0.96364
TM9SF3	56889	1.10672	0.819324	0.96302
BCAP29	55973	0.597048	1.32643	0.961741
RYBP	23429	1.54687	0.373034	0.959953
XXYLT1	152002	0.644412	1.26756	0.955989
FAHD1	81889	0.864772	1.04647	0.955621
CYB5R1	51706	0.915528	0.987584	0.951556
WDFY1	57590	0.936608	0.964261	0.950434
ARL6IP1	23204	0.972412	0.92702	0.949716
DOPEY2	9980	1.0787	0.818542	0.948623
C17orf49	124944	0.806633	1.08817	0.947402
STARD10	10809	1.40069	0.488946	0.944819
KIAA1217	56243	1.08908	0.797643	0.943363
GLB1	2720	1.20298	0.682607	0.942793
NDFIP1	80762	1.0704	0.814745	0.94257
FBXL20	84961	1.71851	0.164996	0.941753
RRAGC	64121	0.694855	1.18856	0.941707
RAB25	57111	1.13533	0.735285	0.935308
CD151	977	0.531055	1.33887	0.934963
TDRKH	11022	0.730358	1.13938	0.93487
ILF3	3609	0.924908	0.944498	0.934703
EIF2AK3	9451	1.06845	0.797355	0.9329
FAM129A	116496	0.692428	1.17233	0.932379
HILPDA	29923	1.20587	0.653883	0.929878
DCAF15	90379	0.768153	1.08958	0.928868
ERP44	23071	1.09683	0.753156	0.924992
VAPB	9217	0.633543	1.21537	0.924457
VMA21	203547	0.476433	1.37025	0.923343
CYP2S1	29785	1.12317	0.719319	0.921243
CBR3	874	0.9596	0.875829	0.917714
FAM213A	84293	0.475537	1.3585	0.91702
FAM213A	84293	0.475537	1.3585	0.91702
TRAM1	23471	1.4697	0.358834	0.914265
NUCB1	4924	0.709524	1.11629	0.912905
TPRG1L	127262	1.3124	0.511143	0.911771
BCAT2	587	0.62384	1.19627	0.910057
PDIA3	2923	1.29336	0.522503	0.907932
ECI2	10455	1.38417	0.430488	0.907331
ARF4	378	1.14012	0.673654	0.906889
CIB1	10519	1.05443	0.755366	0.904895
LAMP2	3920	1.11412	0.6943	0.904209
LIMCH1	22998	0.380152	1.42454	0.902344
INSR	3643	1.08216	0.715539	0.89885
MYO1B	4430	0.85427	0.94055	0.89741
FAM178A	55719	0.0896578	1.70453	0.897094
SCARB1	949	0.255174	1.53881	0.896992
SLC22A18	5002	1.36072	0.42603	0.893374
PTPLAD1	51495	0.955236	0.831498	0.893367
AHNAK2	113146	0.318996	1.46683	0.892911
ATRN	8455	0.53794	1.24623	0.892086
HTATIP2	10553	0.432482	1.34697	0.889728
COLGALT1	79709	1.46617	0.30635	0.886258
GFER	2671	0.813531	0.956394	0.884963
SERINC3	10955	0.0814934	1.68349	0.88249
MAPRE3	22924	1.20722	0.538272	0.872744
DNAJA4	55466	1.46777	0.275793	0.871781
RNF114	55905	0.352286	1.38987	0.871076
SYNGR3	9143	0.924392	0.815421	0.869906
CSTA	1475	1.36832	0.37081	0.869563
DDX24	57062	0.20618	1.52835	0.867267
TMEM135	65084	0.0956383	1.63774	0.866688
HIBCH	26275	1.30601	0.423807	0.86491
SLC30A7	148867	0.744562	0.982286	0.863424
CCDC134	79879	1.38578	0.332674	0.859228
CTTNBP2NL	55917	1.6339	0.084313	0.859107
RPP30	10556	0.642938	1.07512	0.859026
MRPL47	57129	1.09048	0.624143	0.857311
SEC23A	10484	1.60472	0.104147	0.854431
TMOD2	29767	0.747348	0.960013	0.85368
PTRH2	51651	0.378259	1.3248	0.85153
UQCRH	7388	0.434616	1.26778	0.8512
GSTK1	373156	0.446766	1.25393	0.85035
VAMP7	6845	0.751993	0.942036	0.847014
VPS39	23339	0.378901	1.31461	0.846753
TMEM245	23731	0.641713	1.05167	0.84669
RTN4	57142	1.06964	0.623569	0.846605
TRAPPC1	58485	0.263775	1.42735	0.845563
B3GAT3	26229	0.910616	0.779189	0.844902
PSME4	23198	0.446731	1.2361	0.841417
TMEM115	11070	0.32804	1.35265	0.840348
EXD2	55218	0.931249	0.748336	0.839792
P2RX4	5025	1.52937	0.149683	0.839525
RINT1	60561	0.578517	1.09729	0.837902
SERPINH1	871	1.12918	0.544245	0.836715
RARA	5914	0.986419	0.683832	0.835125
SP4	6671	0.96896	0.695594	0.832277
TXNL4A	10907	0.62758	1.03686	0.83222
DSCR3	10311	1.20676	0.450936	0.828846
TUSC3	7991	1.51457	0.142581	0.828574
DMTF1	9988	0.644522	1.0125	0.828511
CTAGE5	4253	0.92376	0.732403	0.828082
TACO1	51204	0.658847	0.996384	0.827616
SPRYD4	283377	0.231563	1.42309	0.827329
ALDH3A2	224	0.72068	0.930704	0.825692
TMEM147	10430	0.524896	1.12593	0.825414
ZFPL1	7542	1.00189	0.646868	0.824377
DNAJC5	80331	0.433401	1.21367	0.823537
ABCG2	9429	1.1187	0.52507	0.821887
RAB7L1	8934	0.807458	0.836241	0.821849
RPP25	54913	0.275081	1.368	0.821542
S100A16	140576	1.41603	0.225068	0.820546
CLCN7	1186	0.557499	1.08247	0.819985
TMEM106B	54664	0.756306	0.881568	0.818937
SRPR	6734	1.12313	0.513851	0.818492
SEC13	6396	1.03201	0.603098	0.817552
PARP4	143	0.223466	1.40988	0.816674
AP3B2	8120	0.232923	1.39742	0.81517
ANKIB1	54467	0.665051	0.964913	0.814982
AMBRA1	55626	0.546378	1.08268	0.814528
SRI	6717	0.670372	0.956954	0.813663
OXSM	54995	0.671878	0.951802	0.81184
ATP11A	23250	0.894263	0.726998	0.81063
C14orf166	51637	1.4224	0.196976	0.809689
ACSF3	197322	1.60223	0.0162415	0.809236
TNKS	8658	1.47768	0.140257	0.808967
DDX1	1653	1.16183	0.452194	0.80701
RHEB	6009	0.402665	1.20971	0.806186
TXNRD2	10587	0.96557	0.64572	0.805645
TRIM3	10612	0.726708	0.883342	0.805025
SLC25A46	91137	0.577508	1.03183	0.80467
HSPA5	3309	0.708305	0.89876	0.803532
KCTD21	283219	0.897451	0.707	0.802226
STBD1	8987	0.939198	0.664186	0.801692
HACL1	26061	1.25042	0.352054	0.80124
COG7	91949	0.713694	0.886301	0.799997
HNRNPH1	3187	0.575553	1.02169	0.798622
ACOT8	10005	0.61496	0.982143	0.798551
EPHX1	2052	1.56294	0.0300446	0.796494
DGUOK	1716	1.12488	0.467967	0.796424
RAB4B	53916	0.863054	0.727467	0.79526
SEC62	7095	1.26325	0.321811	0.792532
SLC25A17	10478	0.452094	1.13164	0.791865
SLC2A1	6513	0.973513	0.608531	0.791022
HSD17B7	51478	0.923738	0.657037	0.790387
CAP2	10486	0.518821	1.06175	0.790284
GLCE	26035	1.22179	0.355747	0.788769
ABHD6	57406	1.3195	0.257874	0.788686
ZNF706	51123	0.957145	0.620226	0.788686
CALCOCO2	10241	0.385028	1.19155	0.78829
SLC25A11	8402	0.938961	0.637265	0.788113
RRBP1	6238	0.796971	0.778954	0.787962
RAB2A	5862	0.700406	0.87361	0.787008
SLC9A1	6548	0.719497	0.853859	0.786678
PRKACA	5566	0.535737	1.03681	0.786274
MRPS11	64963	1.28651	0.283609	0.785061
RBBP8	5932	0.0895141	1.4801	0.784806
MFN2	9927	0.785897	0.778353	0.782125
S100A10	6281	0.855158	0.708346	0.781752
KIF5C	3800	1.19137	0.370258	0.780817
PPP2R4	5524	0.434082	1.12725	0.780665
TMEM205	374882	0.778013	0.781822	0.779917
FAM134C	162427	0.762539	0.795152	0.778846
SEC61B	10952	0.448281	1.10801	0.778144
CORO2A	7464	1.43373	0.113942	0.773835
HYOU1	10525	0.286361	1.26044	0.7734
ERO1L	30001	1.51945	0.0269593	0.773204
HSD17B12	51144	0.896072	0.647885	0.771979
GOLGA5	9950	0.988624	0.555239	0.771931
FAM219B	57184	0.638316	0.902981	0.770649
ALG9	79796	1.35216	0.188645	0.770404
ZCCHC17	51538	0.71004	0.818445	0.764242
HMGN1	3150	0.422821	1.10562	0.764223
CST6	1474	0.530662	0.997761	0.764212
OGFR	11054	0.379283	1.14872	0.764002
LRCH1	23143	0.499728	1.02786	0.763795
HK1	3098	1.00409	0.520604	0.762346
TMED9	54732	0.67559	0.847821	0.761706
GRB2	2885	0.820975	0.702142	0.761559
RCE1	9986	0.407246	1.11587	0.761558
KIAA1715	80856	0.870876	0.650881	0.760879
ATP6AP2	10159	1.10672	0.414992	0.760855
EMC3	55831	0.669311	0.849368	0.75934
TMEM181	57583	0.187302	1.33102	0.759162
XPC	7508	0.240658	1.27449	0.757573
PSTPIP2	9050	0.379932	1.13299	0.756462
PCYOX1	51449	0.760404	0.751614	0.756009
UQCR10	29796	0.0431053	1.46887	0.755985
UQCRC2	7385	1.08515	0.424478	0.754816
PBXIP1	57326	1.19187	0.317118	0.754493
LPGAT1	9926	1.01332	0.494461	0.753892
NSDHL	50814	0.574857	0.931958	0.753407
KIAA1109	84162	0.250509	1.25295	0.75173
SYNGR2	9144	0.444004	1.05882	0.75141
POP5	51367	0.974625	0.525028	0.749826
CHID1	66005	0.95212	0.546349	0.749235
TMEM87A	25963	0.444361	1.05248	0.74842
LYRM4	57128	1.1256	0.369328	0.747464
MGST1	4257	0.889188	0.605532	0.74736
RAB1A	5861	0.508909	0.984874	0.746892
HRSP12	10247	0.995833	0.497246	0.74654
DNAJC1	64215	0.874785	0.613238	0.744011
MTFMT	123263	0.924454	0.562308	0.743381
NBEA	26960	0.711625	0.774301	0.742963
LAMC1	3915	0.879611	0.603693	0.741652
CD9	928	1.37663	0.10558	0.741104
USO1	8615	0.92504	0.555967	0.740504
ATP13A1	57130	0.42746	1.05309	0.740276
MBOAT7	79143	1.16346	0.315616	0.739537
OS9	10956	0.38293	1.09486	0.738895
MROH1	727957	0.629161	0.847828	0.738494
PPP1CC	5501	1.38025	0.0954106	0.737828
MSL3	10943	0.584568	0.888504	0.736536
SRP9	6726	0.728007	0.744838	0.736423
THYN1	29087	0.921355	0.550425	0.73589
RAB6A	5870	0.979246	0.488645	0.733945
ZHX2	22882	1.35314	0.114405	0.733774
TMED7	51014	0.881733	0.585549	0.733641
STX6	10228	0.839398	0.627212	0.733305
MRPL32	64983	0.74191	0.722772	0.732341
CHTF8	54921	1.30368	0.160532	0.732106
PRPF38B	55119	0.764751	0.698686	0.731719
SLC44A1	23446	0.199955	1.26309	0.731524
RTN2	6253	1.15536	0.305105	0.730231
EPB41L1	2036	1.15069	0.305305	0.728
TRABD	80305	0.753367	0.701766	0.727566
IER3IP1	51124	0.996213	0.457722	0.726968
MCC	4163	0.494945	0.958368	0.726657
MIA3	375056	0.966202	0.486061	0.726131
RNF121	55298	0.743256	0.708429	0.725843
LAMTOR1	55004	0.639172	0.811622	0.725397
SLC37A4	2542	1.29799	0.152254	0.725122
PFKFB2	5208	0.702843	0.747364	0.725104
RHOB	388	1.26018	0.184349	0.722266
MREG	55686	0.594176	0.848878	0.721527
COG5	10466	0.78528	0.652077	0.718679
RPP14	11102	0.621677	0.812679	0.717178
ZFYVE21	79038	0.381109	1.04774	0.714425
ZNF787	126208	0.570694	0.857035	0.713865
RBP7	116362	0.408732	1.01715	0.712939
PHF1	5252	1.26841	0.155228	0.711818
XAB2	56949	1.01718	0.403453	0.710316
ATF7IP	55729	0.619216	0.800117	0.709667
PADI2	11240	0.974064	0.44491	0.709487
CYP4F11	57834	0.64382	0.773966	0.708893
NOS1AP	9722	1.33363	0.0820518	0.707842
CALR	811	0.488675	0.923407	0.706041
LAP3	51056	0.134071	1.27581	0.704941
STX5	6811	1.04136	0.368009	0.704687
PIP4K2C	79837	0.492096	0.916706	0.704401
DNAJC3	5611	0.472711	0.925885	0.699298
CAT	847	0.759225	0.637828	0.698527
ATP11B	23200	1.23295	0.16256	0.697756
HMGCL	3155	1.26803	0.126398	0.697213
ITGA3	3675	0.107051	1.28333	0.695188
SOAT1	6646	0.831978	0.557318	0.694648
PRAF2	11230	0.720017	0.669231	0.694624
NOMO3	408050	0.4621	0.920251	0.691176
ARMCX3	51566	0.709377	0.671336	0.690357
RMDN3	55177	1.00504	0.375566	0.690305
MED13	9969	1.06968	0.31085	0.690266
VAMP8	8673	0.511509	0.867145	0.689327
AHR	196	0.793848	0.584748	0.689298
NEDD9	4739	1.29548	0.0824692	0.688975
FGFR1OP2	26127	1.21005	0.162575	0.686315
AGPAT3	56894	0.141499	1.23057	0.686034
TMEM230	29058	0.312651	1.05843	0.68554
GPR89A	653519	0.601053	0.769748	0.6854
SVIL	6840	0.64382	0.726341	0.685081
TMEM59	9528	0.22337	1.14592	0.684644
HINT3	135114	0.77242	0.596125	0.684272
PCID2	55795	0.728066	0.638887	0.683477
PRPF38A	84950	0.851642	0.515195	0.683419
CLSTN1	22883	1.20587	0.156719	0.681296
PTPRS	5802	1.27289	0.0895206	0.681206
DPP4	1803	1.16925	0.192781	0.681017
FAM177A1	283635	1.0184	0.343238	0.680819
SLC2A13	114134	1.00093	0.359017	0.679975
SPAG1	6674	0.929012	0.429791	0.679402
MRPS35	60488	1.07479	0.28341	0.679101
ARL6IP5	10550	1.35761	1.71376e-05	0.678815
PARL	55486	0.91174	0.443011	0.677376
STT3A	3703	0.501758	0.851462	0.67661
C17orf62	79415	0.392043	0.95775	0.674897
TMED5	50999	0.540268	0.807116	0.673692
DAPK3	1613	1.20848	0.138573	0.673528
CRTAP	10491	0.896804	0.449504	0.673154
VPS11	55823	0.479483	0.865312	0.672398
COG1	9382	0.519844	0.822792	0.671318
SNX11	29916	0.729179	0.612779	0.670979
COG3	83548	0.615182	0.725969	0.670576
TRAFD1	10906	1.082	0.258433	0.670218
LAMTOR3	8649	0.413605	0.920696	0.66715
CHD8	57680	0.839158	0.494559	0.666858
RECQL	5965	1.22056	0.112731	0.666646
RAB5A	5868	0.729383	0.602652	0.666017
PPOX	5498	0.94385	0.388171	0.666011
SORT1	6272	0.599068	0.731311	0.66519
MORF4L1	10933	0.489025	0.838727	0.663876
RAB12	201475	0.904302	0.422158	0.66323
TEX2	55852	0.371931	0.953773	0.662852
SAR1A	56681	1.12412	0.199297	0.661706
BAZ2A	11176	1.1654	0.157806	0.661605
CLPTM1	1209	0.0696151	1.25274	0.661176
ABCD1	215	0.308987	1.00746	0.658222
C6orf47	57827	0.762994	0.552211	0.657602
GOLGB1	2804	0.89778	0.414463	0.656122
ARL1	400	0.705114	0.606922	0.656018
GPAA1	8733	0.174871	1.12753	0.651202
MYO5B	4645	0.709274	0.591916	0.650595
USP11	8237	1.29217	0.00759514	0.64988
ARMC1	55156	0.472061	0.827402	0.649732
LETM1	3954	1.2126	0.0859616	0.64928
EMC1	23065	0.412261	0.885604	0.648932
SETD3	84193	0.231198	1.06574	0.648467
ZMPSTE24	10269	0.56644	0.726905	0.646673
MTX1	4580	1.01665	0.276508	0.646581
SLC25A22	79751	0.94482	0.347931	0.646376
GLIPR2	152007	0.685002	0.606192	0.645597
STK10	6793	0.774893	0.514746	0.644819
ATP2A3	489	0.803174	0.483478	0.643326
TRIM4	89122	0.970359	0.313536	0.641947
HADHA	3030	0.814299	0.466825	0.640562
ZER1	10444	1.242	0.0383074	0.640153
SMAD2	4087	1.0358	0.236624	0.636211
AMN1	196394	1.1337	0.138718	0.63621
ABCC5	10057	0.620602	0.65174	0.636171
FHIT	2272	0.475218	0.795145	0.635182
FERMT2	10979	1.09612	0.17374	0.634929
ARMC10	83787	0.919761	0.34708	0.63342
TSPAN15	23555	0.336706	0.920637	0.628671
PTK2B	2185	0.890793	0.365777	0.628285
EHHADH	1962	0.950299	0.305953	0.628126
ACAT1	38	0.843109	0.41245	0.62778
DDX50	79009	1.1098	0.14425	0.627022
ABHD17B	51104	0.730053	0.523785	0.626919
SFMBT1	51460	0.0202915	1.2316	0.625944
SLC39A11	201266	1.07411	0.17777	0.625938
DHTKD1	55526	0.935219	0.316401	0.62581
NIPSNAP1	8508	1.24752	0.0016689	0.624592
REEP5	7905	0.871079	0.377002	0.624041
MCL1	4170	0.378669	0.868947	0.623808
DDX49	54555	0.91443	0.333003	0.623716
RAB5B	5869	0.921296	0.326063	0.623679
RBM19	9904	0.297016	0.949404	0.62321
USF1	7391	0.250679	0.994663	0.622671
TMEM14C	51522	0.58081	0.663251	0.62203
ESYT2	57488	0.284628	0.957589	0.621108
DYNC1LI1	51143	0.801661	0.43905	0.620355
SPCS3	60559	0.73494	0.505563	0.620252
SURF4	6836	0.723489	0.516317	0.619903
PRKD2	25865	1.18586	0.0512937	0.618575
MANF	7873	0.795371	0.441509	0.61844
FAM134A	79137	0.189098	1.0475	0.618297
HSP90B1	7184	0.830084	0.406444	0.618264
NDUFAF1	51103	1.09413	0.14198	0.618054
MRPL22	29093	0.873867	0.35973	0.616798
TMEM63B	55362	0.72532	0.506784	0.616052
DNAJC6	9829	1.00104	0.227403	0.61422
SLC33A1	9197	0.368474	0.859772	0.614123
VAT1	10493	1.10687	0.11955	0.613209
SEC22A	26984	1.07126	0.154445	0.612851
YBEY	54059	0.24609	0.979011	0.61255
NOVA2	4858	0.986513	0.237541	0.612027
CTCF	10664	0.179704	1.04396	0.61183
LPCAT1	79888	0.36697	0.854553	0.610762
CHD2	1106	0.948494	0.272974	0.610734
DHRS1	115817	0.414327	0.806493	0.61041
SH3BGRL2	83699	0.975916	0.244024	0.60997
BAIAP2L1	55971	0.66705	0.55256	0.609805
COX14	84987	0.029832	1.18758	0.608706
CNP	1267	0.453616	0.763209	0.608413
KIAA1324L	222223	0.945563	0.271259	0.608411
CLSTN3	9746	1.21009	0.00437171	0.60723
BCAR3	8412	1.1389	0.0730678	0.605984
COPA	1314	0.890321	0.317324	0.603822
F2R	2149	0.579781	0.626907	0.603344
ACAA1	30	0.398204	0.808362	0.603283
MDH2	4191	0.82761	0.377675	0.602642
ATP6V1G1	9550	0.472686	0.732354	0.60252
B4GALT4	8702	0.496291	0.705337	0.600814
KIF23	9493	0.177321	1.0224	0.599861
UQCRC1	7384	0.97551	0.223035	0.599273
TPBG	7162	0.938101	0.259121	0.598611
WTAP	9589	1.08605	0.111136	0.598593
LAMTOR2	28956	0.474675	0.71899	0.596832
DEF6	50619	1.14915	0.0440902	0.596622
SRRM1	10250	0.481659	0.709769	0.595714
AKAP13	11214	0.585037	0.604119	0.594578
ANO6	196527	0.663676	0.525414	0.594545
THOC2	57187	0.266484	0.921296	0.59389
FAM32A	26017	0.200984	0.982551	0.591768
FAM20B	9917	0.922324	0.259932	0.591128
MTHFR	4524	0.805054	0.376176	0.590615
SLC9A7	84679	0.966891	0.213714	0.590302
TMEM132A	54972	0.143334	1.03703	0.590181
FAM8A1	51439	0.726159	0.452963	0.589561
FTSJ2	29960	0.0651916	1.11196	0.588576
RFX2	5990	0.752792	0.423517	0.588155
FBXO21	23014	0.976912	0.197763	0.587338
ACSS2	55902	0.494087	0.679547	0.586817
PLA2G15	23659	1.13764	0.0350539	0.586349
RBM45	129831	1.09054	0.0819394	0.586239
TMEM101	84336	0.60912	0.559086	0.584103
RAB10	10890	0.58798	0.579972	0.583976
CDS2	8760	0.717886	0.449965	0.583926
ENPP4	22875	0.976178	0.189358	0.582768
PNPLA8	50640	0.860632	0.304155	0.582394
FECH	2235	0.878735	0.285938	0.582336
SSBP4	170463	0.572085	0.589415	0.58075
MRPL17	63875	0.39912	0.758175	0.578647
FOSL2	2355	1.04608	0.110397	0.578239
STXBP2	6813	1.15233	0.0020624	0.577196
ERN1	2081	0.287408	0.866716	0.577062
ATP8B1	5205	0.389971	0.763021	0.576496
RAB21	23011	0.54333	0.608772	0.576051
COPS5	10987	0.951125	0.199384	0.575254
HEATR1	55127	0.702369	0.447923	0.575146
SRP68	6730	0.806157	0.342859	0.574508
ITGA5	3678	1.05004	0.0958738	0.572958
RPP40	10799	0.448723	0.696172	0.572448
BLVRB	645	1.03035	0.112891	0.571622
FUCA1	2517	0.963727	0.179506	0.571616
GNB1	2782	0.789413	0.352842	0.571128
ETFDH	2110	0.896611	0.245599	0.571105
SLC35B2	347734	0.313925	0.825732	0.569828
TRIM28	10155	0.661499	0.477874	0.569687
C16orf80	29105	0.361382	0.777911	0.569647
SLC25A12	8604	0.869061	0.269809	0.569435
MYH14	79784	0.864396	0.273693	0.569044
RAB24	53917	0.878746	0.255501	0.567124
GNAI2	2771	1.03449	0.0981059	0.566297
CNPY3	10695	0.667364	0.465079	0.566221
CYTH2	9266	0.214049	0.916928	0.565489
KIAA2013	90231	0.947449	0.18103	0.56424
CDIPT	10423	0.544126	0.583203	0.563665
CLTC	1213	0.741821	0.385324	0.563573
SUCLG1	8802	0.665114	0.461871	0.563493
SGPP1	81537	0.488506	0.637731	0.563119
USP32	84669	0.541273	0.584949	0.563111
FYCO1	79443	0.556377	0.569569	0.562973
SACM1L	22908	0.710934	0.414919	0.562926
SPECC1	92521	0.277259	0.848417	0.562838
ATP11C	286410	0.716594	0.408863	0.562728
C9orf114	51490	0.232503	0.891916	0.56221
LUC7L2	51631	0.175294	0.948659	0.561976
BSPRY	54836	0.478815	0.644515	0.561665
NBAS	51594	0.616052	0.506144	0.561098
SEC61A2	55176	0.391572	0.730026	0.560799
SURF1	6834	0.367185	0.752264	0.559725
CST3	1471	0.627857	0.487304	0.55758
SLC12A9	56996	0.256084	0.858946	0.557515
UNC13B	10497	0.55674	0.555346	0.556043
MGAT1	4245	0.309565	0.800366	0.554965
PKP2	5318	0.788744	0.320406	0.554575
RAB7A	7879	0.567739	0.536028	0.551883
ADCY9	115	0.10865	0.994666	0.551658
LLGL2	3993	0.274547	0.82796	0.551253
SEC31A	22872	0.422607	0.679422	0.551014
PLEKHM2	23207	0.430486	0.67036	0.550423
TMED4	222068	0.893934	0.204057	0.548996
PLA2G16	11145	0.969333	0.128242	0.548787
ASS1	445	0.580316	0.51487	0.547593
SLC30A6	55676	0.211004	0.884122	0.547563
BCAP31	10134	0.323184	0.771366	0.547275
TOMM40	10452	0.876656	0.215938	0.546297
RPN1	6184	0.603076	0.48831	0.545693
RAB31	11031	0.432012	0.657528	0.54477
SNRPB2	6629	0.952514	0.134814	0.543664
PITHD1	57095	0.856643	0.229845	0.543244
GBF1	8729	0.97864	0.107715	0.543178
WDR91	29062	0.0442285	1.04012	0.542173
CCNK	8812	0.312875	0.769477	0.541176
ARHGAP5	394	0.657484	0.421216	0.53935
IDH3A	3419	0.85048	0.224129	0.537305
CLK3	1198	0.752419	0.321226	0.536823
NUP205	23165	0.687173	0.385705	0.536439
LIG4	3981	0.762591	0.309892	0.536242
SPTY2D1	144108	0.68777	0.382977	0.535374
IDH3G	3421	0.639993	0.428123	0.534058
GBAS	2631	0.918595	0.147076	0.532835
TMEM33	55161	0.401971	0.661482	0.531726
PIK3R3	8503	0.13096	0.930875	0.530917
COTL1	23406	0.679727	0.381886	0.530807
MECOM	2122	0.44057	0.620152	0.530361
ETFA	2108	0.850914	0.20952	0.530217
RRP1B	23076	0.639251	0.419474	0.529363
POLG2	11232	0.206979	0.851515	0.529247
RAB9A	9367	0.845926	0.212002	0.528964
TRIM32	22954	0.502536	0.554725	0.528631
MOGS	7841	0.654352	0.399428	0.52689
TBL2	26608	0.669841	0.382644	0.526243
MFAP1	4236	0.770824	0.279545	0.525184
GOT1	2805	0.729548	0.319771	0.52466
AGFG2	3268	0.129491	0.91977	0.52463
SPINT2	10653	0.807186	0.239633	0.52341
CBX1	10951	0.509603	0.536693	0.523148
CAMK2G	818	0.742019	0.304179	0.523099
RRAS2	22800	0.71191	0.329783	0.520846
RALGAPA1	253959	0.982679	0.0558773	0.519278
THEM4	117145	0.110454	0.926631	0.518542
TSPAN14	81619	0.206648	0.829326	0.517987
C14orf169	79697	0.326359	0.70842	0.51739
PXMP4	11264	0.0285205	1.00434	0.516432
LACTB	114294	0.989466	0.042437	0.515951
MED16	10025	0.447936	0.581455	0.514696
ALDH6A1	4329	0.162582	0.866387	0.514484
BDH1	622	0.648237	0.380613	0.514425
ANXA2	302	0.0121332	1.0162	0.514165
ADCK5	203054	0.509311	0.518371	0.513841
GLE1	2733	0.705573	0.320013	0.512793
QSOX1	5768	0.715266	0.309851	0.512559
UBR1	197131	0.545878	0.477669	0.511773
UQCRFS1	7386	0.823659	0.199887	0.511773
RAB27A	5873	0.944207	0.0792996	0.511753
OCIAD1	54940	0.480008	0.541522	0.510765
SEC24C	9632	0.714829	0.306429	0.510629
MRC2	9902	0.89896	0.120902	0.509931
NCEH1	57552	0.835901	0.183715	0.509808
PLEKHA6	22874	0.964294	0.0537092	0.509002
PTPRU	10076	0.263032	0.753367	0.508199
TK2	7084	0.409611	0.605247	0.507429
TRAPPC4	51399	0.422148	0.592204	0.507176
UTP23	84294	0.217088	0.797022	0.507055
PRPF19	27339	0.568072	0.445246	0.506659
CHMP1B	57132	0.968843	0.0439681	0.506406
PAQR4	124222	0.330357	0.681459	0.505908
RNMT	8731	1.00391	0.00691728	0.505412
PGRMC2	10424	0.733734	0.276364	0.505049
SAMM50	25813	0.810303	0.198441	0.504372
TCEB2	6923	0.836478	0.17035	0.503414
TAOK3	51347	0.542878	0.463702	0.50329
ITCH	83737	0.868893	0.136648	0.50277
SMU1	55234	0.593747	0.408431	0.501089
ATP7A	538	0.52192	0.478754	0.500337
STX8	9482	0.363722	0.636324	0.500023
SEC22B	9554	0.919724	0.0802675	0.499996
FAM117B	150864	0.734943	0.263126	0.499034
PHYH	5264	0.203425	0.794288	0.498857
CYBRD1	79901	0.358774	0.637992	0.498383
GTF2B	2959	0.723855	0.271514	0.497684
WWP1	11059	0.487683	0.506364	0.497024
TOP2B	7155	0.350533	0.641695	0.496114
UFL1	23376	0.201654	0.787919	0.494786
SNAP47	116841	0.961628	0.0243114	0.49297
STT3B	201595	0.613803	0.367307	0.490555
URB2	9816	0.286234	0.693063	0.489648
SNRPC	6631	0.882978	0.0944564	0.488717
ILVBL	10994	0.298112	0.67921	0.488661
SLC30A1	7779	0.734002	0.243219	0.48861
VAPA	9218	0.697154	0.279642	0.488398
STC2	8614	0.176923	0.797983	0.487453
CASP7	840	0.949346	0.0243034	0.486825
RER1	11079	0.187731	0.785591	0.486661
COL6A2	1292	0.329298	0.642359	0.485828
FLCN	201163	0.381841	0.587332	0.484586
CLMN	79789	0.170929	0.797648	0.484288
ALG2	85365	0.450644	0.514593	0.482618
ATP5O	539	0.861523	0.103184	0.482354
ATP5C1	509	0.609221	0.35196	0.48059
RAB11FIP1	80223	0.137198	0.822895	0.480046
SIAE	54414	0.264746	0.694768	0.479757
RPS6KC1	26750	0.807598	0.150971	0.479285
PDHA1	5160	0.868675	0.0883938	0.478534
DDX47	51202	0.565589	0.391414	0.478502
NRBP1	29959	0.658639	0.297005	0.477822
DMXL2	23312	0.26308	0.692341	0.477711
LAMB3	3914	0.594461	0.357086	0.475774
OGDH	4967	0.770426	0.180041	0.475234
MPHOSPH8	54737	0.0587924	0.890811	0.474802
CUL7	9820	0.65179	0.29712	0.474455
ABCD3	5825	0.494239	0.453564	0.473901
MYEF2	50804	0.771046	0.176549	0.473798
LLPH	84298	0.118479	0.828487	0.473483
EMC7	56851	0.333572	0.612311	0.472942
MED27	9442	0.503096	0.441946	0.472521
SNX29	92017	0.707615	0.237175	0.472395
PRKCA	5578	0.869808	0.0734808	0.471644
TYK2	7297	0.382173	0.56022	0.471196
CDH1	999	0.811457	0.130649	0.471053
SYTL4	94121	0.66213	0.277953	0.470041
GLYR1	84656	0.481325	0.458522	0.469923
SCAMP2	10066	0.341108	0.597915	0.469511
UQCC1	55245	0.627739	0.311003	0.469371
MINPP1	9562	0.0695874	0.869032	0.46931
EIF4A3	9775	0.781262	0.156686	0.468974
CCNH	902	0.259949	0.676895	0.468422
CRAMP1L	57585	0.291321	0.640855	0.466088
PTPN6	5777	0.449985	0.48039	0.465187
MYO3B	140469	0.446298	0.483738	0.465018
RPS24	6229	0.644427	0.285118	0.464772
PDIA4	9601	0.148603	0.779912	0.464258
TANC1	85461	0.285386	0.642009	0.463697
UVRAG	7405	0.251956	0.67473	0.463343
TPM1	7168	0.596204	0.328145	0.462174
ABHD16A	7920	0.49433	0.424858	0.459594
HEXA	3073	0.827219	0.0916267	0.459423
DNAJA1	3301	0.205205	0.713228	0.459217
FUCA2	2519	0.232153	0.684229	0.458191
ARHGEF18	23370	0.521331	0.39367	0.457501
HMGN4	10473	0.378601	0.535257	0.456929
PTOV1	53635	0.438305	0.47507	0.456688
ZNF652	22834	0.224466	0.687523	0.455995
TARS2	80222	0.353923	0.557255	0.455589
CROT	54677	0.351412	0.55912	0.455266
CIRH1A	84916	0.588944	0.321036	0.45499
MSH2	4436	0.864417	0.0448583	0.454638
RRP12	23223	0.266793	0.642426	0.454609
SERPINA1	5265	0.247854	0.661308	0.454581
NGDN	25983	0.675486	0.233615	0.45455
FLII	2314	0.217832	0.690644	0.454238
SMARCC2	6601	0.0910979	0.816106	0.453602
ALDH5A1	7915	0.264726	0.642052	0.453389
EPHA2	1969	0.87177	0.0349974	0.453384
COPG1	22820	0.721217	0.184842	0.45303
RNF139	11236	0.533349	0.371871	0.45261
ARMCX1	51309	0.312572	0.590243	0.451408
ADCK3	56997	0.376652	0.52467	0.450661
NAMPT	10135	0.012439	0.88762	0.450029
DYNC1H1	1778	0.651665	0.24397	0.447818
GLT8D1	55830	0.819201	0.0758632	0.447532
RPL32	6161	0.843409	0.0504878	0.446948
CUL9	23113	0.13619	0.756737	0.446464
CMC1	152100	0.474467	0.413722	0.444094
SLC35A1	10559	0.191172	0.696685	0.443929
YAF2	10138	0.705811	0.181971	0.443891
MOB4	25843	0.56601	0.321278	0.443644
PIGU	128869	0.181126	0.705956	0.443541
CCDC85B	11007	0.341985	0.544339	0.443162
LENG8	114823	0.760399	0.125872	0.443136
KIAA1429	25962	0.369997	0.514831	0.442414
ARNT	405	0.292235	0.591478	0.441856
EXOSC2	23404	0.343612	0.539202	0.441407
RAB3D	9545	0.490893	0.391863	0.441378
HNRNPUL2	221092	0.80295	0.0795124	0.441231
MAZ	4150	0.207707	0.673812	0.44076
OMA1	115209	0.669261	0.212085	0.440673
HSD17B4	3295	0.549432	0.331722	0.440577
SYNJ2BP	55333	0.722772	0.158077	0.440424
OSBPL5	114879	0.462508	0.418075	0.440292
PCCB	5096	0.742603	0.137085	0.439844
KCTD5	54442	0.0861695	0.793466	0.439818
PI4KA	5297	0.407664	0.470855	0.439259
ATG9A	79065	0.102923	0.775417	0.43917
NSF	4905	0.484588	0.393123	0.438855
RHBDF1	64285	0.686009	0.190852	0.438431
SGK3	23678	0.434981	0.440932	0.437957
SNRPF	6636	0.722002	0.153737	0.43787
OSBP	5007	0.686373	0.188987	0.43768
DCBLD2	131566	0.151189	0.722652	0.43692
C20orf24	55969	0.48165	0.391106	0.436378
GDAP2	54834	0.819094	0.0532862	0.43619
LRRC59	55379	0.532712	0.33903	0.435871
DHRS13	147015	0.136272	0.735191	0.435732
TRIP11	9321	0.0434154	0.827976	0.435696
MFGE8	4240	0.854368	0.0167973	0.435583
CYB5R2	51700	0.534075	0.336126	0.4351
CAP1	10487	0.604688	0.264271	0.434479
LIN37	55957	0.287631	0.580734	0.434182
STK24	8428	0.817922	0.0496653	0.433794
ERGIC2	51290	0.733163	0.134088	0.433625
COPB2	9276	0.627116	0.239386	0.433251
AMPD2	271	0.534572	0.331538	0.433055
ARAF	369	0.52538	0.340637	0.433008
SYNJ1	8867	0.69492	0.170279	0.4326
SLC31A1	1317	0.538843	0.32542	0.432131
WDR89	112840	0.176613	0.686838	0.431725
NPC1	4864	0.568833	0.294454	0.431644
ATPAF2	91647	0.191539	0.669155	0.430347
THOC7	80145	0.0218673	0.83768	0.429774
BRD2	6046	0.67257	0.186562	0.429566
EMC8	10328	0.301933	0.555789	0.428861
DDB1	1642	0.0501606	0.807169	0.428665
TMUB1	83590	0.422319	0.434483	0.428401
WDR7	23335	0.422637	0.434059	0.428348
H6PD	9563	0.691356	0.165016	0.428186
FAM160B1	57700	0.816249	0.0397731	0.428011
MRPS6	64968	0.484388	0.371585	0.427987
NDUFA12	55967	0.153998	0.701456	0.427727
TMED10	10972	0.374379	0.480199	0.427289
GPX8	493869	0.827939	0.025795	0.426867
UBA6	55236	0.391617	0.460369	0.425993
RAB14	51552	0.370374	0.480321	0.425347
DPY19L1	23333	0.395361	0.454323	0.424842
TMEM64	169200	0.150497	0.699008	0.424753
WIPI2	26100	0.688608	0.160651	0.42463
DDX27	55661	0.141013	0.706308	0.42366
VKORC1L1	154807	0.208118	0.637438	0.422778
SNX7	51375	0.283256	0.561863	0.42256
ITPR3	3710	0.629338	0.214696	0.422017
CARKD	55739	0.478627	0.364323	0.421475
LEMD2	221496	0.528049	0.314688	0.421368
ESR1	2099	0.503966	0.337863	0.420914
SPG21	51324	0.287738	0.553051	0.420394
EML1	2009	0.543512	0.296921	0.420216
RBM18	92400	0.600609	0.239294	0.419952
MYL12B	103910	0.498322	0.338797	0.418559
RAB11A	8766	0.495412	0.341439	0.418426
FAM171A2	284069	0.328102	0.508278	0.41819
RBM22	55696	0.276781	0.555094	0.415937
DCAF8	50717	0.416886	0.41464	0.415763
KIAA0226	9711	0.391625	0.439703	0.415664
DHRS7B	25979	0.425883	0.401395	0.413639
NENF	29937	0.67907	0.147688	0.413379
AQR	9716	0.401513	0.421661	0.411587
ZNF574	64763	0.0483533	0.774796	0.411575
ABCB8	11194	0.0313656	0.791682	0.411524
CLTA	1211	0.0861799	0.736482	0.411331
OPHN1	4983	0.186329	0.63555	0.410939
UTP14C	9724	0.755377	0.0663736	0.410875
ARF3	377	0.549108	0.272508	0.410808
AFAP1	60312	0.516535	0.304555	0.410545
MLST8	64223	0.201897	0.61793	0.409913
NPEPL1	79716	0.440461	0.378196	0.409329
RTN3	10313	0.445854	0.372696	0.409275
MTMR3	8897	0.0715374	0.746669	0.409103
TRAPPC6B	122553	0.411429	0.406447	0.408938
NCOA4	8031	0.156824	0.660495	0.408659
SUMO2	6613	0.772957	0.0435597	0.408259
TMEM2	23670	0.520557	0.295153	0.407855
FAM210A	125228	0.622745	0.192931	0.407838
VDAC1	7416	0.593004	0.222189	0.407596
RHOA	387	0.46716	0.34679	0.406975
CHMP7	91782	0.410201	0.40232	0.40626
TIMM50	92609	0.806389	0.00518615	0.405788
TMEM30A	55754	0.513645	0.297117	0.405381
TEP1	7011	0.629161	0.179507	0.404334
IRS2	8660	0.314781	0.492498	0.40364
SGSM3	27352	0.69221	0.114752	0.403481
G3BP2	9908	0.672516	0.133534	0.403025
CNIH4	29097	0.512961	0.290348	0.401654
AP1G2	8906	0.210315	0.590877	0.400596
INPP5B	3633	0.549298	0.25115	0.400224
YEATS2	55689	0.135349	0.663699	0.399524
LEPRE1	64175	0.741595	0.0574352	0.399515
BAX	581	0.20635	0.59054	0.398445
CDKN2AIP	55602	0.516026	0.280087	0.398056
ESYT2	57488	0.149426	0.646579	0.398003
PRRC1	133619	0.655013	0.140688	0.397851
PON3	5446	0.581457	0.214171	0.397814
PPP1R3D	5509	0.340658	0.453986	0.397322
HNRNPLL	92906	0.612487	0.181102	0.396794
MED4	29079	0.596815	0.196434	0.396624
CNNM2	54805	0.4406	0.351337	0.395968
RELL1	768211	0.753933	0.0373708	0.395652
PITPNA	5306	0.498361	0.291382	0.394872
NOM1	64434	0.261154	0.525071	0.393113
SYNE3	161176	0.507527	0.27776	0.392643
KIAA0922	23240	0.69242	0.0916887	0.392054
SSBP1	6742	0.489771	0.294075	0.391923
ALOX5	240	0.563883	0.218596	0.391239
ECHS1	1892	0.311184	0.471032	0.391108
RAB33B	83452	0.685487	0.0946727	0.39008
M6PR	4074	0.157836	0.622131	0.389984
PHB2	11331	0.491793	0.286899	0.389346
PCYOX1L	78991	0.1552	0.622342	0.388771
SEL1L	6400	0.501437	0.274857	0.388147
AP1S1	1174	0.280675	0.494617	0.387646
VAMP3	9341	0.262633	0.511619	0.387126
PPIB	5479	0.0397727	0.734109	0.386941
TNFRSF21	27242	0.55532	0.218031	0.386675
USP42	84132	0.193192	0.579405	0.386298
FDXR	2232	0.328418	0.442642	0.38553
ATP6V0D1	9114	0.613457	0.154043	0.38375
TMEM201	199953	0.290809	0.476602	0.383706
RRP36	88745	0.453768	0.306865	0.380316
PRDX4	10549	0.47927	0.281038	0.380154
SF3B1	23451	0.544048	0.215052	0.37955
SCAP	22937	0.543398	0.215574	0.379486
C1orf27	54953	0.474679	0.283604	0.379141
ALKBH7	84266	0.229679	0.527947	0.378813
IGF1R	3480	0.11482	0.639221	0.37702
CORO1A	11151	0.0672822	0.680909	0.374096
AP1M1	8907	0.375148	0.372893	0.37402
PIGH	5283	0.0102871	0.737182	0.373734
ZFYVE1	53349	0.076767	0.669715	0.373241
VPS16	64601	0.313925	0.432513	0.373219
PRKAG2	51422	0.170194	0.575855	0.373025
SUCLA2	8803	0.659003	0.0853866	0.372195
RCN2	5955	0.483999	0.25971	0.371854
ERP29	10961	0.493134	0.249726	0.37143
ZNF346	23567	0.00591083	0.734851	0.370381
HDAC1	3065	0.344889	0.395869	0.370379
APEX2	27301	0.550733	0.18995	0.370341
VPS41	27072	0.19063	0.549901	0.370265
CRELD2	79174	0.142493	0.597789	0.370141
CCNC	892	0.234688	0.505066	0.369877
YLPM1	56252	0.571302	0.166818	0.36906
IK	3550	0.616217	0.1217	0.368959
STOML2	30968	0.688515	0.0490087	0.368762
ISOC2	79763	0.406988	0.330056	0.368522
DDOST	1650	0.542807	0.193465	0.368136
TMEM168	64418	0.676111	0.0592947	0.367703
USP43	124739	0.641764	0.0931601	0.367462
BNIP1	662	0.679742	0.0549391	0.36734
PLEKHA1	59338	0.671047	0.063118	0.367082
IKBIP	121457	0.279357	0.45423	0.366793
ZMYM2	7750	0.447213	0.285947	0.36658
DBT	1629	0.607082	0.124934	0.366008
ERGIC1	57222	0.673707	0.0569904	0.365349
BCL2L13	23786	0.673924	0.05621	0.365067
GPKOW	27238	0.367759	0.361797	0.364778
SART1	9092	0.555668	0.171845	0.363757
GEMIN8	54960	0.0592285	0.668258	0.363743
RAB5C	5878	0.478977	0.248065	0.363521
TJAP1	93643	0.724926	0.00197474	0.36345
SERGEF	26297	0.553944	0.172171	0.363058
PHLDA2	7262	0.530786	0.19397	0.362378
DNM1L	10059	0.260273	0.463555	0.361914
SCAMP3	10067	0.0902912	0.632856	0.361573
ARL5B	221079	0.594676	0.1276	0.361138
STAT3	6774	0.211291	0.509819	0.360555
SRSF3	6428	0.297928	0.422308	0.360118
SCAMP1	9522	0.447118	0.271587	0.359353
PSMB3	5691	0.4414	0.276087	0.358744
MRPS15	64960	0.567636	0.149464	0.35855
SEC11A	23478	0.355045	0.360258	0.357652
DDX43	55510	0.371269	0.34229	0.356779
DOCK6	57572	0.669369	0.0440633	0.356716
GCC1	79571	0.394017	0.319359	0.356688
HEATR5A	25938	0.344938	0.36726	0.356099
ATL2	64225	0.464303	0.247692	0.355998
GCLC	2729	0.23762	0.474116	0.355868
CADPS2	93664	0.0740133	0.636963	0.355488
COG2	22796	0.365919	0.344135	0.355027
ASF1A	25842	0.308393	0.400652	0.354523
SLK	9748	0.422505	0.286024	0.354264
CDK5RAP3	80279	0.314422	0.393062	0.353742
XPO7	23039	0.151802	0.555595	0.353699
MAPKAP1	79109	0.494384	0.209905	0.352144
COQ7	10229	0.0428602	0.659876	0.351368
MKLN1	4289	0.449413	0.253093	0.351253
BOP1	23246	0.175023	0.527324	0.351174
PIGA	5277	0.0849488	0.614771	0.34986
CLPTM1L	81037	0.42239	0.273166	0.347778
OSBPL2	9885	0.613489	0.0807546	0.347122
FOXC1	2296	0.602504	0.0916201	0.347062
DMXL1	1657	0.341485	0.35246	0.346973
ATP6V1B2	526	0.620968	0.0721633	0.346566
PSME2	5721	0.0234836	0.667429	0.345457
MFN1	55669	0.0605532	0.629861	0.345207
ARHGAP26	23092	0.512871	0.177331	0.345101
ERCC3	2071	0.320186	0.367625	0.343905
CHSY1	22856	0.531467	0.155583	0.343525
LAS1L	81887	0.113258	0.573533	0.343395
CAMLG	819	0.317201	0.369454	0.343328
MED12	9968	0.61269	0.0729059	0.342798
OSBPL10	114884	0.55905	0.126383	0.342717
PEX14	5195	0.473338	0.210442	0.34189
C10orf76	79591	0.123205	0.560543	0.341874
UBE2Q1	55585	0.555023	0.127828	0.341426
ADAM10	102	0.314	0.367312	0.340656
AFG3L2	10939	0.632219	0.0466853	0.339452
PAK1IP1	55003	0.565111	0.112703	0.338907
MRPS27	23107	0.425346	0.250826	0.338086
SRFBP1	153443	0.270311	0.403198	0.336754
JAK2	3717	0.0824541	0.590722	0.336588
PSMC6	5706	0.619523	0.0531018	0.336312
HCFC2	29915	0.291215	0.381293	0.336254
WDR24	84219	0.0667777	0.604858	0.335818
MOB3A	126308	0.624361	0.0470954	0.335728
URB1	9875	0.221259	0.45016	0.33571
THOC1	9984	0.35159	0.319828	0.335709
RPRD1A	55197	0.272187	0.398088	0.335137
SRXN1	140809	0.442002	0.226591	0.334296
VPS45	11311	0.206089	0.461991	0.33404
FLNB	2317	0.439765	0.227966	0.333865
TMEM194A	23306	0.410153	0.255942	0.333048
BRAP	8315	0.462943	0.201032	0.331988
POLG	5428	0.504554	0.159073	0.331814
MMP15	4324	0.539801	0.123736	0.331769
TMCO1	54499	0.363276	0.300063	0.331669
CYBA	1535	0.426633	0.236587	0.33161
C19orf53	28974	0.34876	0.313799	0.33128
NGLY1	55768	0.604811	0.0576688	0.33124
MRPL43	84545	0.42363	0.238804	0.331217
GOSR1	9527	0.364761	0.296603	0.330682
DDX41	51428	0.643944	0.017244	0.330594
ABHD11	83451	0.657269	0.00333529	0.330302
PTPRJ	5795	0.00405291	0.656078	0.330066
TMLHE	55217	0.56686	0.0925354	0.329698
SULF1	23213	0.0366231	0.622519	0.329571
PPIF	10105	0.276042	0.38249	0.329266
TRAPPC10	7109	0.169204	0.487691	0.328447
MED14	9282	0.332602	0.324248	0.328425
LAMC2	3918	0.518121	0.138414	0.328268
GPR180	160897	0.282062	0.373512	0.327787
RNF219	79596	0.152764	0.499451	0.326108
GNA13	10672	0.0661339	0.585931	0.326032
STX18	53407	0.111019	0.540091	0.325555
PELP1	27043	0.239095	0.411774	0.325435
PRPF8	10594	0.113071	0.537558	0.325314
C9orf89	84270	0.648106	0.000324607	0.324215
SUGP2	10147	0.420719	0.226906	0.323813
TEX264	51368	0.078649	0.568624	0.323636
AGPAT6	137964	0.140535	0.506457	0.323496
IMMT	10989	0.626988	0.0199859	0.323487
EIF3E	3646	0.193477	0.453363	0.32342
CCAR2	57805	0.249682	0.3968	0.323241
TRA2B	6434	0.293625	0.349577	0.321601
HDAC2	3066	0.0902202	0.551649	0.320935
MICAL3	57553	0.21003	0.431823	0.320927
PTCD3	55037	0.49487	0.146041	0.320456
NPTN	27020	0.293817	0.346799	0.320308
CPSF4	10898	0.600013	0.0386981	0.319356
MAGT1	84061	0.487394	0.150661	0.319027
ARL15	54622	0.62448	0.0127552	0.318617
NOTCH2	4853	0.062882	0.573758	0.31832
SH3BP5	9467	0.0856214	0.5509	0.318261
UQCC2	84300	0.607611	0.0288866	0.318249
VPS18	57617	0.146056	0.489552	0.317804
VIPAS39	63894	0.111476	0.523719	0.317597
SLC27A4	10999	0.489474	0.144778	0.317126
TRIP4	9325	0.169346	0.463152	0.316249
PAQR7	164091	0.578154	0.053283	0.315719
ASCC3	10973	0.327496	0.303874	0.315685
WDR20	91833	0.311969	0.318487	0.315228
INTS8	55656	0.115255	0.511988	0.313621
INPP5K	51763	0.40607	0.219604	0.312837
RBBP7	5931	0.210638	0.413925	0.312281
COG8	84342	0.383371	0.24118	0.312275
MTCH1	23787	0.56391	0.0604368	0.312173
HID1	283987	0.47052	0.151456	0.310988
NPLOC4	55666	0.436463	0.184897	0.31068
GCDH	2639	0.120604	0.500468	0.310536
NOL8	55035	0.175115	0.44544	0.310277
AAMDC	28971	0.610982	0.0064695	0.308726
MRPL13	28998	0.318918	0.296748	0.307833
MED23	9439	0.364814	0.249225	0.307019
SCAF1	58506	0.0936373	0.51906	0.306349
TMEM66	51669	0.599723	0.0123577	0.30604
TLDC1	57707	0.574933	0.0356526	0.305293
ADK	132	0.493559	0.116209	0.304884
TRMT1	55621	0.213174	0.395164	0.304169
PYGB	5834	0.447249	0.161051	0.30415
AIMP2	7965	0.0517764	0.55607	0.303923
GATAD1	57798	0.391012	0.215421	0.303216
C18orf8	29919	0.441853	0.16357	0.302712
JMY	133746	0.0802992	0.519196	0.299748
MGEA5	10724	0.551202	0.047612	0.299407
MPRIP	23164	0.590197	0.00821149	0.299204
THUMPD1	55623	0.476297	0.121614	0.298956
TPR	7175	0.473179	0.121962	0.29757
CIR1	9541	0.481584	0.112738	0.297161
NDUFB10	4716	0.175899	0.414775	0.295337
TOR1AIP1	26092	0.479287	0.110798	0.295042
USP20	10868	0.210656	0.379101	0.294879
SND1	27044	0.0656284	0.524047	0.294838
MRPL44	65080	0.478325	0.111209	0.294767
DERL1	79139	0.324978	0.262224	0.293601
AGPAT2	10555	0.562139	0.0244011	0.29327
EDC3	80153	0.240479	0.345931	0.293205
CREB1	1385	0.389251	0.196418	0.292834
HSF1	3297	0.147301	0.437903	0.292602
SMPD4	55627	0.331089	0.253968	0.292528
PLEC	5339	0.556274	0.0263767	0.291325
NR2F2	7026	0.263003	0.319633	0.291318
GLA	2717	0.085605	0.49509	0.290347
MED19	219541	0.11018	0.47047	0.290325
ASH2L	9070	0.330721	0.249603	0.290162
PSEN1	5663	0.214524	0.365363	0.289943
SPCS1	28972	0.219367	0.359631	0.289499
STX7	8417	0.289626	0.287693	0.28866
FLOT2	2319	0.304041	0.272944	0.288492
GOLPH3	64083	0.548812	0.0271398	0.287976
PFKFB3	5209	0.39971	0.171678	0.285694
RHBDF2	79651	0.0479405	0.523409	0.285675
EIF3K	27335	0.161168	0.408309	0.284739
PDXK	8566	0.459374	0.108469	0.283921
NCSTN	23385	0.152362	0.414917	0.283639
SCFD1	23256	0.440401	0.126679	0.28354
PITPNC1	26207	0.194579	0.37236	0.28347
DDX23	9416	0.349485	0.216905	0.283195
ANXA9	8416	0.0425797	0.523509	0.283044
ZYG11B	79699	0.410985	0.15495	0.282967
EI24	9538	0.564326	0.00134342	0.282835
EMC2	9694	0.014678	0.550273	0.282475
CNOT2	4848	0.248084	0.316287	0.282186
DYNC1I2	1781	0.478425	0.0840371	0.281231
UXS1	80146	0.210868	0.350354	0.280611
ATP6V1H	51606	0.45651	0.103609	0.28006
ACTR1A	10121	0.392637	0.166282	0.279459
ACYP1	97	0.27919	0.279125	0.279158
GLMN	11146	0.389857	0.167059	0.278458
LARP7	51574	0.00745127	0.549423	0.278437
PHF14	9678	0.0254571	0.528594	0.277026
CCDC71L	168455	0.0238282	0.529518	0.276673
PLOD3	8985	0.240443	0.312497	0.27647
PLCG1	5335	0.430323	0.122578	0.27645
STRBP	55342	0.101634	0.450063	0.275849
EPPK1	83481	0.337191	0.214019	0.275605
RRP8	23378	0.362756	0.186082	0.274419
PAM16	51025	0.195318	0.351351	0.273335
C12orf73	728568	0.443386	0.102942	0.273164
CBX2	84733	0.190211	0.354549	0.27238
PHF8	23133	0.0924433	0.45216	0.272301
SIPA1L1	26037	0.134133	0.409957	0.272045
SLC25A6	293	0.535701	0.00815964	0.27193
S100PBP	64766	0.170394	0.37218	0.271287
MDH1	4190	0.49709	0.0429045	0.269997
ZNF668	79759	0.298873	0.240008	0.26944
PDXDC1	23042	0.116356	0.422168	0.269262
RBPMS	11030	0.230238	0.307225	0.268731
BSDC1	55108	0.490987	0.0462116	0.2686
NAPA	8775	0.470773	0.0661988	0.268486
INTS4	92105	0.362788	0.173967	0.268378
MRP63	78988	0.220372	0.315686	0.268029
KIAA0930	23313	0.171222	0.364615	0.267919
LUZP1	7798	0.41128	0.123777	0.267528
RUFY2	55680	0.182027	0.352806	0.267416
MIOS	54468	0.134329	0.399703	0.267016
RPS15A	6210	0.155337	0.377346	0.266341
CLDN7	1366	0.0949784	0.437678	0.266328
KIN	22944	0.0141892	0.515575	0.264882
SYTL1	84958	0.129183	0.399441	0.264312
TRAPPC2L	51693	0.0644383	0.463978	0.264208
KDM1A	23028	0.416484	0.111012	0.263748
SMCR8	140775	0.0139412	0.513109	0.263525
NUPL2	11097	0.363929	0.162411	0.26317
RAB35	11021	0.309935	0.215714	0.262825
TXNDC11	51061	0.0638636	0.460881	0.262372
MRPS5	64969	0.277292	0.245207	0.26125
FRA10AC1	118924	0.343313	0.178645	0.260979
MRPS36	92259	0.507563	0.0143278	0.260946
NUP85	79902	0.327515	0.194283	0.260899
VCP	7415	0.455725	0.0659961	0.26086
APPBP2	10513	0.0575721	0.463856	0.260714
ZC3H13	23091	0.238384	0.282925	0.260655
AK2	204	0.359506	0.16121	0.260358
NDUFB9	4715	0.185604	0.334208	0.259906
LYRM2	57226	0.125924	0.393332	0.259628
EPHB3	2049	0.470299	0.0482621	0.259281
APP	351	0.10198	0.411617	0.256799
MGAT4B	11282	0.173069	0.339583	0.256326
UTP15	84135	0.311965	0.200129	0.256047
GRB7	2886	0.000602366	0.510519	0.255561
SNRNP200	23020	0.0261383	0.484494	0.255316
EEA1	8411	0.453332	0.0572007	0.255266
TRAF7	84231	0.247229	0.262835	0.255032
IMPAD1	54928	0.205656	0.303986	0.254821
NKRF	55922	0.30734	0.201712	0.254526
FASTKD1	79675	0.0229037	0.485504	0.254204
PRPF4	9128	0.482493	0.0255143	0.254004
NSMCE4A	54780	0.103854	0.402118	0.252986
DIP2B	57609	0.365321	0.138973	0.252147
RRP7A	27341	0.140084	0.363262	0.251673
UGGT1	56886	0.184647	0.317576	0.251111
TIMM23	100287932	0.478375	0.0232889	0.250832
METTL15	196074	0.218781	0.282565	0.250673
CKAP5	9793	0.25514	0.245011	0.250075
ZBTB11	27107	0.105032	0.393989	0.24951
GALNT6	11226	0.270405	0.227185	0.248795
POP4	10775	0.211646	0.284665	0.248155
SUCLG2	8801	0.429229	0.0662754	0.247752
POT1	25913	0.20055	0.292481	0.246516
RBM12B	389677	0.237662	0.250585	0.244124
VPS33A	65082	0.151626	0.335793	0.24371
TBC1D2	55357	0.0899213	0.396405	0.243163
WDR11	55717	0.099145	0.385997	0.242571
IQGAP2	10788	0.335366	0.148691	0.242028
AAMP	14	0.280198	0.202805	0.241501
ATP6V1E1	529	0.307679	0.175075	0.241377
NDUFS4	4724	0.365416	0.117018	0.241217
GTF2H2	2966	0.027918	0.454505	0.241212
TOLLIP	54472	0.45739	0.0238101	0.2406
GFM1	85476	0.34453	0.135683	0.240107
CCDC25	55246	0.256626	0.223508	0.240067
SPRED2	200734	0.250983	0.228655	0.239819
SMC5	23137	0.308843	0.170109	0.239476
KHK	3795	0.429789	0.0479044	0.238847
PLRG1	5356	0.296187	0.180228	0.238208
C5orf24	134553	0.0935873	0.382507	0.238047
FXN	2395	0.256193	0.219115	0.237654
TRIM56	81844	0.0256712	0.449585	0.237628
ASXL2	55252	0.444198	0.0302268	0.237213
OSBPL11	114885	0.375455	0.0974792	0.236467
SIN3B	23309	0.192392	0.28007	0.236231
CHCHD1	118487	0.396141	0.0762684	0.236205
VIMP	55829	0.0809815	0.391281	0.236131
MRPL3	11222	0.370863	0.101216	0.236039
TOM1	10043	0.224284	0.247715	0.235999
USP7	7874	0.125941	0.344484	0.235212
TRAPPC3	27095	0.391727	0.0786126	0.23517
EMC10	284361	0.36289	0.106833	0.234861
RICTOR	253260	0.353454	0.115295	0.234374
FAM21C	253725	0.00422597	0.462025	0.233126
ILF2	3608	0.40816	0.0578193	0.23299
IMPACT	55364	0.0996512	0.364386	0.232018
IPO13	9670	0.185707	0.278278	0.231992
RBPJ	3516	0.0746893	0.389213	0.231951
RBMX2	51634	0.0528285	0.410016	0.231422
PIGG	54872	0.301588	0.160938	0.231263
HNRNPH2	3188	0.255555	0.206575	0.231065
RBMS1	5937	0.34933	0.11093	0.23013
GALNT10	55568	0.253247	0.206259	0.229753
CCNT1	904	0.158702	0.300722	0.229712
CWC15	51503	0.201246	0.255269	0.228257
P4HB	5034	0.18122	0.273283	0.227251
SMPD2	6610	0.0319021	0.420197	0.226049
DDX17	10521	0.141204	0.310123	0.225664
TXNDC5	81567	0.151835	0.296558	0.224196
C16orf62	57020	0.332614	0.115729	0.224171
POGK	57645	0.27407	0.1737	0.223885
LMAN2L	81562	0.406055	0.0400454	0.22305
CRY2	1408	0.28406	0.161694	0.222877
NDUFAF2	91942	0.280071	0.163622	0.221846
UBE3C	9690	0.0957674	0.347848	0.221808
NUDT9	53343	0.121274	0.322153	0.221713
HSPA6	3310	0.228633	0.21152	0.220077
DHX9	1660	0.220804	0.218963	0.219884
RBM4	5936	0.0890885	0.350305	0.219697
FAM91A1	157769	0.102832	0.335657	0.219244
LPIN2	9663	0.192493	0.245416	0.218954
NACC1	112939	0.229823	0.20792	0.218871
FAM65A	79567	0.383211	0.0539681	0.21859
NUDCD1	84955	0.172227	0.264559	0.218393
SFSWAP	6433	0.184978	0.251657	0.218318
ARHGAP17	55114	0.1841	0.251069	0.217585
MOCS1	4337	0.129876	0.30446	0.217168
MON2	23041	0.300574	0.132955	0.216765
ATG16L1	55054	0.396916	0.0365711	0.216743
QTRT1	81890	0.0053162	0.427685	0.216501
CLASRP	11129	0.191656	0.240602	0.216129
ANXA1	301	0.0206906	0.408296	0.214493
CHM	1121	0.0951995	0.333689	0.214444
TRIM2	23321	0.0998754	0.328464	0.214169
SPTLC2	9517	0.225777	0.201305	0.213541
PNN	5411	0.192318	0.233547	0.212933
PPP4R2	151987	0.0184423	0.406753	0.212597
CUL4B	8450	0.00199315	0.422635	0.212314
MRPL39	54148	0.242208	0.181582	0.211895
GEMIN2	8487	0.178968	0.242908	0.210938
MRPL18	29074	0.0938169	0.326982	0.210399
PTPN9	5780	0.065322	0.354643	0.209982
ARHGEF28	64283	0.239144	0.180746	0.209945
CCDC130	81576	0.296025	0.123317	0.209671
AGAP2	116986	0.176558	0.241446	0.209002
MAP3K4	4216	0.406065	0.0118041	0.208935
NOP9	161424	0.0684345	0.349262	0.208848
TAF2	6873	0.343882	0.071019	0.20745
HSPA13	6782	0.361853	0.052863	0.207358
ZNF609	23060	0.208335	0.205188	0.206762
MYH9	4627	0.15729	0.256014	0.206652
MIB1	57534	0.057139	0.354643	0.205891
SRPK2	6733	0.357985	0.0537797	0.205882
NDC1	55706	0.200323	0.211442	0.205882
TMEM70	54968	0.127416	0.284028	0.205722
GNPTAB	79158	0.121284	0.286789	0.204036
ZNF691	51058	0.0267918	0.381066	0.203929
HMGXB4	10042	0.129738	0.276611	0.203175
THOC6	79228	0.272573	0.132507	0.20254
NTMT1	28989	0.241636	0.162187	0.201912
INTS5	80789	0.0139921	0.389742	0.201867
GPS1	2873	0.245759	0.157185	0.201472
CORO1B	57175	0.200492	0.20222	0.201356
ARFGEF1	10565	0.000190655	0.401284	0.200737
MPP5	64398	0.127647	0.273701	0.200674
ANXA3	306	0.166077	0.234801	0.200439
GFPT1	2673	0.394309	0.00559753	0.199953
MRPL23	6150	0.165944	0.233635	0.199789
GTF3C5	9328	0.152409	0.246854	0.199632
KIAA1244	57221	0.384421	0.0143398	0.199381
MRPS24	64951	0.257028	0.13835	0.197689
PLXDC2	84898	0.332944	0.0612186	0.197081
ZBTB33	10009	0.055138	0.338753	0.196945
FKBP2	2286	0.164633	0.22909	0.196862
POLB	5423	0.346927	0.0446643	0.195795
HERC1	8925	0.195443	0.194439	0.194941
USE1	55850	0.0918099	0.29776	0.194785
GTF3C3	9330	0.0732185	0.315331	0.194275
PRUNE2	158471	0.267342	0.118954	0.193148
FCHO2	115548	0.216923	0.165585	0.191254
KIDINS220	57498	0.248626	0.131554	0.19009
IGSF3	3321	0.070449	0.30854	0.189494
IMP4	92856	0.320646	0.0582519	0.189449
JPH1	56704	0.313004	0.0654518	0.189228
DAGLB	221955	0.0936102	0.283862	0.188736
SNRNP35	11066	0.290569	0.0865247	0.188547
F11R	50848	0.186253	0.19081	0.188532
CSTB	1476	0.201624	0.175424	0.188524
PTPMT1	114971	0.357485	0.0163916	0.186938
GPX4	2879	0.301173	0.0716349	0.186404
TLE3	7090	0.250952	0.121057	0.186005
SRP14	6727	0.133132	0.23855	0.185841
LANCL2	55915	0.312017	0.0579425	0.18498
TRIM27	5987	0.0353756	0.327587	0.181481
SYK	6850	0.314602	0.0465414	0.180571
NCBP1	4686	0.131596	0.22724	0.179418
BCKDK	10295	0.117036	0.241252	0.179144
SUPT20H	55578	0.0516155	0.306553	0.179084
COG4	25839	0.218654	0.139336	0.178995
ACADM	34	0.275855	0.0808774	0.178366
RAC1	5879	0.344297	0.0122404	0.178268
NOC2L	26155	0.0849893	0.271467	0.178228
FAM114A2	10827	0.243605	0.111772	0.177689
TAPT1	202018	0.212015	0.139974	0.175994
CYB5B	80777	0.191016	0.160364	0.17569
TIA1	7072	0.232342	0.116612	0.174477
POC5	134359	0.251184	0.0947416	0.172963
SNRPD2	6633	0.155564	0.190323	0.172943
MLF2	8079	0.216878	0.128909	0.172893
RAB4A	5867	0.194771	0.150624	0.172698
CSNK1D	1453	0.055853	0.286046	0.170949
CEBPZ	10153	0.221624	0.120237	0.17093
MAST3	23031	0.166533	0.174271	0.170402
LSG1	55341	0.0215955	0.317936	0.169766
FOXO3	2309	0.105477	0.233648	0.169562
SNX13	23161	0.318706	0.0202476	0.169477
LSM12	124801	0.0972029	0.240283	0.168743
TRAPPC9	83696	0.0332602	0.302517	0.167889
SNW1	22938	0.280525	0.053639	0.167082
EDEM3	80267	0.140932	0.192343	0.166637
MRPS33	51650	0.0651898	0.267026	0.166108
CELF1	10658	0.311447	0.0189668	0.165207
NUDT21	11051	0.237656	0.0923363	0.164996
ABCB7	22	0.15444	0.175294	0.164867
PWP2	5822	0.115384	0.214035	0.16471
NRBP2	340371	0.187416	0.141545	0.164481
PLS1	5357	0.0547397	0.27141	0.163075
NAA16	79612	0.308804	0.015806	0.162305
NDUFAF6	137682	0.130402	0.192242	0.161322
ACTR8	93973	0.157235	0.163494	0.160364
PGRMC1	10857	0.194132	0.121906	0.158019
CCDC22	28952	0.00839621	0.304764	0.15658
RPS3	6188	0.129423	0.182365	0.155894
MTIF2	4528	0.198025	0.113356	0.15569
PPP6C	5537	0.0741289	0.236399	0.155264
TNPO3	23534	0.164223	0.14533	0.154777
SLC25A40	55972	0.205754	0.101561	0.153658
C6orf120	387263	0.056472	0.24977	0.153121
ZMYM4	9202	0.0540014	0.252104	0.153053
CTPS2	56474	0.0359071	0.270151	0.153029
INADL	10207	0.245216	0.0594489	0.152332
MRPL42	28977	0.0560616	0.248274	0.152168
FASN	2194	0.108748	0.194955	0.151852
SON	6651	0.214808	0.0888177	0.151813
VPS29	51699	0.128703	0.174855	0.151779
GAR1	54433	0.216409	0.0857262	0.151067
MAN2B2	23324	0.209132	0.0919294	0.150531
RRN3	54700	0.239729	0.0608425	0.150286
EXOC2	55770	0.109964	0.188614	0.149289
LETMD1	25875	0.0779094	0.218358	0.148133
NPM1	4869	0.154032	0.142186	0.148109
NUP188	23511	0.215138	0.0758738	0.145506
MINK1	50488	0.201798	0.0880867	0.144943
PPP1R9B	84687	0.223648	0.0658302	0.144739
RPL18A	6142	0.0705244	0.21831	0.144417
STARD5	80765	0.212386	0.0759207	0.144153
VPS26A	9559	0.0864224	0.201274	0.143848
HDAC6	10013	0.0557376	0.231154	0.143446
TBC1D24	57465	0.0113157	0.274706	0.143011
ASCC1	51008	0.173651	0.111479	0.142565
SEPT8	23176	0.153775	0.131004	0.142389
PIP4K2B	8396	0.0300351	0.250487	0.140261
EIF2AK1	27102	0.100313	0.17952	0.139917
RBMX	27316	0.249341	0.0302382	0.139789
FBXL15	79176	0.25731	0.0216204	0.139465
GALE	2582	0.170252	0.108079	0.139166
INTS10	55174	0.0611061	0.216437	0.138771
CDK9	1025	0.163112	0.113008	0.13806
MRPL24	79590	0.210882	0.0621808	0.136531
ABCC4	10257	0.101776	0.170479	0.136127
DCAKD	79877	0.138045	0.13087	0.134457
TMEM246	84302	0.0693797	0.198893	0.134136
RAF1	5894	0.110945	0.156742	0.133843
IGFBP2	3485	0.0731678	0.193994	0.133581
CPSF2	53981	0.112823	0.147813	0.130318
SEC23B	10483	0.20507	0.0553978	0.130234
RPP38	10557	0.024047	0.233216	0.128632
AP2B1	163	0.19085	0.0638261	0.127338
TOMM70A	9868	0.14894	0.104512	0.126726
RHOT2	89941	0.148715	0.102847	0.125781
CCDC90B	60492	0.0835977	0.167851	0.125724
RPL30	6156	0.0674633	0.183643	0.125553
UBR7	55148	0.00131382	0.249668	0.125491
KHDRBS3	10656	0.18088	0.0698457	0.125363
MACF1	23499	0.0517597	0.197402	0.124581
THOC5	8563	0.219731	0.0289493	0.12434
ACLY	47	0.21631	0.0321441	0.124227
EIF3L	51386	0.114311	0.132405	0.123358
GORASP1	64689	0.0584572	0.187453	0.122955
RPTOR	57521	0.149092	0.096498	0.122795
STAP2	55620	0.0196112	0.225919	0.122765
LTBP4	8425	0.074552	0.170347	0.12245
NECAP2	55707	0.173193	0.0703728	0.121783
GNB2	2783	0.0824901	0.160727	0.121609
UBR5	51366	0.169364	0.0738502	0.121607
RAE1	8480	0.120992	0.122157	0.121574
RPSA	3921	0.0388609	0.203893	0.121377
CEP135	9662	0.203479	0.03875	0.121115
PEX1	5189	0.0277377	0.212152	0.119945
EXOC6B	23233	0.000348617	0.238352	0.11935
MCM3AP	8888	0.232079	0.0052901	0.118685
MECR	51102	0.215963	0.0210131	0.118488
VCPIP1	80124	0.0661285	0.168181	0.117155
IKBIP	121457	0.196029	0.0370269	0.116528
WDR55	54853	0.0491544	0.18313	0.116142
FRG1	2483	0.0730535	0.159009	0.116031
RFK	55312	0.173208	0.0585097	0.115859
UHRF1BP1L	23074	0.189875	0.0417054	0.11579
LPIN3	64900	0.0806934	0.150724	0.115709
ZNF800	168850	0.0141694	0.216926	0.115548
MED11	400569	0.109051	0.12066	0.114856
SNRPD1	6632	0.0233455	0.204056	0.113701
TRIM5	85363	0.0117036	0.213336	0.11252
USP39	10713	0.0253584	0.19909	0.112224
ATP5F1	515	0.213453	0.0107637	0.112108
ATP6V1C1	528	0.0221156	0.199681	0.110898
MRPL35	51318	0.029309	0.190368	0.109838
MYO9B	4650	0.0163947	0.202108	0.109252
HSPA8	3312	0.021724	0.195458	0.108591
SAP30	8819	0.0254474	0.19167	0.108559
EIF3H	8667	0.0408514	0.176153	0.108502
WDR75	84128	0.0523829	0.162647	0.107515
ERBB2	2064	0.0755115	0.137793	0.106652
EARS2	124454	0.138843	0.0717662	0.105304
ANXA4	307	0.0931859	0.117196	0.105191
PSMD3	5709	0.00124919	0.208282	0.104765
RAD1	5810	0.0347569	0.173436	0.104097
ZNF646	9726	0.203245	0.00486355	0.104054
RING1	6015	0.205159	0.00263863	0.103899
RNH1	6050	0.113559	0.0933233	0.103441
MRPL20	55052	0.0282048	0.176035	0.10212
FIP1L1	81608	0.108645	0.0950101	0.101828
WDR37	22884	0.152617	0.0497877	0.101202
CDK19	23097	0.0318363	0.169527	0.100682
HPS5	11234	0.0916116	0.108762	0.100187
IPO11	51194	0.0440937	0.155461	0.0997775
FNBP1	23048	0.166832	0.032319	0.0995758
SEC63	11231	0.0910421	0.106098	0.0985703
HMG20A	10363	0.0958837	0.101232	0.0985577
DHX16	8449	0.0667779	0.129854	0.0983158
PAPOLA	10914	0.149216	0.0455941	0.0974052
TEX10	54881	0.0473437	0.144191	0.0957675
TBC1D20	128637	0.179546	0.00955468	0.0945504
SCYL1	57410	0.168514	0.0202059	0.09436
SNRPB	6628	0.015952	0.171703	0.0938276
SHPK	23729	0.142027	0.0441308	0.0930787
PACS1	55690	0.0757896	0.109845	0.0928171
TUBGCP4	27229	0.0882001	0.0961125	0.0921563
DHX57	90957	0.0347503	0.147709	0.0912295
GPRC5A	9052	0.00675377	0.172829	0.0897913
ERCC5	2073	0.0625527	0.116015	0.0892841
NXT1	29107	0.0713003	0.106062	0.0886811
ISY1	57461	0.0404911	0.136801	0.0886459
MED30	90390	0.146348	0.0298019	0.0880747
SREBF1	6720	0.0234051	0.151014	0.0872096
PPP1R11	6992	0.100167	0.072639	0.0864028
CDC42BPB	9578	0.0131898	0.1594	0.0862951
ARAP1	116985	0.0379098	0.133431	0.0856704
HSPA9	3313	0.0124334	0.157037	0.0847354
ARMC8	25852	0.0999803	0.0626353	0.0813078
EXOC8	149371	0.0308042	0.128215	0.0795095
TSSC1	7260	0.0160613	0.14239	0.0792258
MED22	6837	0.0555267	0.102219	0.0788729
STRIP1	85369	0.141898	0.00512302	0.0735106
SWAP70	23075	0.0372097	0.10841	0.07281
VPS33B	26276	0.111784	0.0323536	0.0720687
GTF3C1	2975	0.123137	0.0199846	0.0715607
FOCAD	54914	0.0593514	0.0785539	0.0689527
LSM2	57819	0.0753589	0.0590869	0.0672229
STAM2	10254	0.0367526	0.096526	0.0666393
RSU1	6251	0.1259	0.00387993	0.06489
ZDHHC5	25921	0.0759945	0.0537447	0.0648696
UBAC2	337867	0.0309769	0.0970706	0.0640237
PPP1R12A	4659	0.00989071	0.116802	0.0633465
TRAPPC8	22878	0.0277479	0.0959945	0.0618712
GUF1	60558	0.0821212	0.0391421	0.0606316
TTC39B	158219	0.103243	0.0164795	0.0598614
TNFAIP8	25816	0.0766925	0.0421589	0.0594257
NDNL2	56160	0.01558	0.102515	0.0590476
CPPED1	55313	0.063806	0.0534632	0.0586346
MAVS	57506	0.0458798	0.0687778	0.0573288
MYO1D	4642	0.0174131	0.0945866	0.0559999
TARDBP	23435	0.0668021	0.0447122	0.0557572
H1FX	8971	0.0204693	0.0907113	0.0555903
SLC38A10	124565	0.0767452	0.0337006	0.0552229
PET112	5188	0.10572	0.00392438	0.0548222
ZCCHC7	84186	0.0656652	0.0424658	0.0540655
MRPS34	65993	0.0429658	0.064348	0.0536569
SKIV2L2	23517	0.0552312	0.0516549	0.053443
TSKU	25987	0.0548502	0.0506801	0.0527651
USP28	57646	0.0793349	0.0235443	0.0514396
AP4M1	9179	0.0130817	0.0877484	0.0504151
RDH14	57665	0.0139942	0.0845395	0.0492669
COQ5	84274	0.0336786	0.0626919	0.0481852
TWISTNB	221830	0.0513217	0.0416496	0.0464857
RBBP6	5930	0.00647581	0.0858164	0.0461461
WDR82	80335	0.0299184	0.0596606	0.0447895
PDS5B	23047	0.013321	0.0755255	0.0444233
SAAL1	113174	0.0791025	0.00731291	0.0432077
HMBS	3145	0.0321776	0.048256	0.0402168
EIF3C	8663	0.0683297	0.00796647	0.0381481
EIF3C	8663	0.0683297	0.00796647	0.0381481
USP34	9736	0.0116247	0.0594426	0.0355336
NUP88	4927	0.0483036	0.0216452	0.0349744
RAPGEF1	2889	0.0587986	0.00794637	0.0333725
AP2M1	1173	0.0363921	0.0291329	0.0327625
LRPPRC	10128	0.0438022	0.00939721	0.0265997
ARRB1	408	0.0193765	0.0285974	0.023987
RBM15	64783	0.0419756	0.00239706	0.0221863
LAMTOR5	10542	0.00377056	0.0277083	0.0157394
DLG5	9231	0.0027263	0.0204122	0.0115692
OSBPL1A	114876	0.00535597	0.00524884	0.00530241
EIF2AK4	440275	0.00263281	0.00292127	0.00277704
SHANK2	22941	-0.0210233	-0.0038362	-0.0124298
RPS6KA4	8986	-0.00800268	-0.0365844	-0.0222935
RP9	6100	-0.0210736	-0.0270193	-0.0240465
OTUB1	55611	-0.0237475	-0.0264407	-0.0250941
SRSF10	10772	-0.041695	-0.00865953	-0.0251773
TADA1	117143	-0.0438446	-0.00754818	-0.0256964
GTF3C4	9329	-0.0359199	-0.0167674	-0.0263437
SMG1	23049	-0.0155403	-0.0389029	-0.0272216
ZNF318	24149	-0.018548	-0.0429541	-0.030751
ESYT1	23344	-0.0585873	-0.00510865	-0.031848
RNF40	9810	-0.0672798	-0.00809071	-0.0376853
EEF1D	1936	-0.0104175	-0.0737998	-0.0421087
LMNA	4000	-0.05232	-0.0358086	-0.0440643
CDK7	1022	-0.0768617	-0.0138041	-0.0453329
NUDCD3	23386	-0.0131839	-0.0777382	-0.0454611
WASL	8976	-0.018984	-0.0727352	-0.0458596
KAZN	23254	-0.0207888	-0.0761218	-0.0484553
KIAA1462	57608	-0.0494596	-0.0519899	-0.0507247
ESPN	83715	-0.00267314	-0.101851	-0.0522622
TCF7L2	6934	-0.000179401	-0.104772	-0.0524757
PACSIN1	29993	-0.0634093	-0.0477952	-0.0556023
BAZ2B	29994	-0.0552976	-0.0565777	-0.0559376
NDUFV2	4729	-0.104648	-0.0110601	-0.057854
MCAT	27349	-0.08872	-0.0275546	-0.0581373
PIK3C2B	5287	-0.074046	-0.0424548	-0.0582504
TADA2B	93624	-0.0569238	-0.0619543	-0.059439
TSPYL5	85453	-0.0507235	-0.0721579	-0.0614407
CDC73	79577	-0.10863	-0.0197154	-0.0641727
MRPL4	51073	-0.0562453	-0.0731103	-0.0646778
MSH3	4437	-0.0482789	-0.081107	-0.064693
GRHPR	9380	-0.104992	-0.0251716	-0.0650816
NDUFS1	4719	-0.025893	-0.104533	-0.0652129
METTL3	56339	-0.0276516	-0.103787	-0.0657192
NVL	4931	-0.0909982	-0.0438621	-0.0674301
PRMT6	55170	-0.109278	-0.0257113	-0.0674948
TAF5L	27097	-0.00529094	-0.1309	-0.0680955
TPRKB	51002	-0.0824732	-0.0576073	-0.0700403
THUMPD2	80745	-0.0184464	-0.121845	-0.0701459
NR2F6	2063	-0.0655324	-0.0762678	-0.0709001
MRPS17	51373	-0.0439868	-0.0993477	-0.0716672
PPT2	9374	-0.043913	-0.102545	-0.0732292
MRPS25	64432	-0.0488461	-0.0983858	-0.0736159
SH3RF1	57630	-0.073202	-0.0742421	-0.0737221
WDR18	57418	-0.0798157	-0.0680718	-0.0739438
TSNAX	7257	-0.117407	-0.0308888	-0.0741477
FAM120A	23196	-0.119896	-0.0285104	-0.074203
SUPV3L1	6832	-0.0965124	-0.052706	-0.0746092
SNRNP40	9410	-0.106274	-0.0451667	-0.0757203
PCYT1A	5130	-0.0910865	-0.0610984	-0.0760924
SMIM20	389203	-0.0593157	-0.0934644	-0.0763901
ATXN3	4287	-0.0196123	-0.134779	-0.0771956
TFB1M	51106	-0.00402674	-0.155841	-0.0799338
IRAK4	51135	-0.0119768	-0.147993	-0.0799849
CPSF3	51692	-0.054563	-0.106239	-0.080401
NCK1	4690	-0.0821023	-0.0800284	-0.0810653
MRPL19	9801	-0.111233	-0.0512079	-0.0812204
LARP4B	23185	-0.113519	-0.0503564	-0.0819376
NDUFS6	4726	-0.0409293	-0.123478	-0.0822038
STIP1	10963	-0.00429476	-0.161757	-0.083026
EIF3D	8664	-0.0879758	-0.0781327	-0.0830543
CHD7	55636	-0.0678945	-0.103747	-0.0858209
ZFYVE28	57732	-0.0264178	-0.146136	-0.0862771
SHOC2	8036	-0.0707971	-0.101991	-0.0863939
MPHOSPH10	10199	-0.0230833	-0.150863	-0.0869731
COPS6	10980	-0.00931611	-0.164724	-0.0870199
GULP1	51454	-0.150991	-0.0235496	-0.0872703
THG1L	54974	-0.122543	-0.0525319	-0.0875373
ZNF384	171017	-0.0544739	-0.120968	-0.0877208
ZNF330	27309	-0.176026	-0.00211243	-0.089069
DCUN1D1	54165	-0.00203938	-0.179774	-0.0909066
GIPC1	10755	-0.00545257	-0.177538	-0.0914955
GADD45GIP1	90480	-0.171716	-0.0117546	-0.0917352
RELA	5970	-0.109926	-0.0750901	-0.0925083
ALDH1A3	220	-0.0318148	-0.154283	-0.0930489
PIK3CB	5291	-0.00274851	-0.18407	-0.0934092
ZZZ3	26009	-0.16794	-0.019948	-0.0939439
PPCS	79717	-0.00718539	-0.180771	-0.0939783
PPP2R2A	5520	-0.0132077	-0.175738	-0.0944727
MIER1	57708	-0.0585628	-0.132524	-0.0955435
CEP97	79598	-0.0278106	-0.163532	-0.0956713
RPF2	84154	-0.17641	-0.0162409	-0.0963255
MED25	81857	-0.142019	-0.0512582	-0.0966386
ATPAF1	64756	-0.185979	-0.0143025	-0.100141
RTF1	23168	-0.151206	-0.0500067	-0.100606
PIGS	94005	-0.168827	-0.0337019	-0.101264
SMC3	9126	-0.124855	-0.0781314	-0.101493
HPS3	84343	-0.130799	-0.0729775	-0.101888
SPANXE	171489	-0.0392261	-0.169096	-0.104161
DHRS11	79154	-0.148652	-0.0617352	-0.105194
EIF2B4	8890	-0.201083	-0.00999995	-0.105542
BRD1	23774	-0.148741	-0.0636904	-0.106216
TRIP10	9322	-0.0940467	-0.118399	-0.106223
FCHSD1	89848	-0.0366508	-0.178295	-0.107473
DOCK7	85440	-0.0646102	-0.152358	-0.108484
EIF2B5	8893	-0.0533483	-0.167144	-0.110246
TFIP11	24144	-0.132236	-0.0883679	-0.110302
ABCA2	20	-0.149257	-0.0735083	-0.111383
SFT2D3	84826	-0.141764	-0.0830655	-0.112415
TAF9	6880	-0.181947	-0.0441301	-0.113039
IMP3	55272	-0.0421399	-0.185193	-0.113666
MLLT3	4300	-0.163437	-0.0639602	-0.113699
OSGEP	55644	-0.162392	-0.0659951	-0.114194
DCLK1	9201	-0.046903	-0.185054	-0.115979
EFR3A	23167	-0.027536	-0.2053	-0.116418
MAP7D1	55700	-0.0505533	-0.182437	-0.116495
WAPAL	23063	-0.109693	-0.123388	-0.11654
MAD2L1BP	9587	-0.22632	-0.00853152	-0.117426
RPS16	6217	-0.0414484	-0.194406	-0.117927
AKAP8	10270	-0.199964	-0.0364314	-0.118198
DEPTOR	64798	-0.164821	-0.0717108	-0.118266
ACTN2	88	-0.0448022	-0.192793	-0.118797
PIAS1	8554	-0.200771	-0.0379061	-0.119338
DHX29	54505	-0.159503	-0.079822	-0.119663
FAM45A	404636	-0.171894	-0.0675401	-0.119717
TUBGCP2	10844	-0.0887692	-0.151373	-0.120071
WDR33	55339	-0.238697	-0.00193986	-0.120319
MTA2	9219	-0.00354151	-0.238899	-0.12122
NDUFV3	4731	-0.219731	-0.0252407	-0.122486
CLIC1	1192	-0.0228087	-0.222261	-0.122535
NF1	4763	-0.112808	-0.134893	-0.12385
SERPINA3	12	-0.124916	-0.124301	-0.124608
IQSEC1	9922	-0.180472	-0.0708336	-0.125653
TAF5	6877	-0.210483	-0.0409421	-0.125713
ZNF845	91664	-0.157362	-0.0942272	-0.125795
HEATR5B	54497	-0.0305977	-0.222196	-0.126397
STK25	10494	-0.158866	-0.0979115	-0.128389
WDR83	84292	-0.0324899	-0.226432	-0.129461
GLTPD1	80772	-0.196168	-0.0630936	-0.129631
GGA2	23062	-0.060968	-0.199708	-0.130338
PSMA7	5688	-0.165988	-0.0975553	-0.131772
CC2D1A	54862	-0.158788	-0.105437	-0.132112
SPICE1	152185	-0.0697613	-0.194559	-0.13216
STK38	11329	-0.23647	-0.0279279	-0.132199
ZNF7	7553	-0.226173	-0.0398885	-0.133031
MTMR6	9107	-0.0165855	-0.250703	-0.133644
EAF1	85403	-0.243374	-0.02399	-0.133682
SLC30A9	10463	-0.0122148	-0.256293	-0.134254
ACACA	31	-0.257068	-0.0125514	-0.13481
POLR3C	10623	-0.209785	-0.0601404	-0.134963
CNOT11	55571	-0.0744241	-0.195984	-0.135204
GPD2	2820	-0.0797888	-0.190641	-0.135215
MCTS1	28985	-0.116519	-0.154107	-0.135313
JMJD1C	221037	-0.128749	-0.142446	-0.135597
PIK3R1	5295	-0.250798	-0.0206622	-0.13573
ATHL1	80162	-0.187296	-0.0853501	-0.136323
BICD2	23299	-0.0230208	-0.250817	-0.136919
COPS3	8533	-0.0883553	-0.186395	-0.137375
HSPH1	10808	-0.0533183	-0.222012	-0.137665
NCKIPSD	51517	-0.022542	-0.254208	-0.138375
MAPK3	5595	-0.0729577	-0.204429	-0.138693
EHBP1L1	254102	-0.0660954	-0.212242	-0.139169
PTPN12	5782	-0.0649389	-0.213968	-0.139454
GEMIN6	79833	-0.118092	-0.161719	-0.139905
ZCCHC9	84240	-0.131577	-0.148321	-0.139949
CDK13	8621	-0.196932	-0.0837425	-0.140337
DNAJA3	9093	-0.209717	-0.0714905	-0.140604
C1QBP	708	-0.139091	-0.144794	-0.141943
CHD3	1107	-0.120053	-0.166754	-0.143404
ZCCHC6	79670	-0.0104657	-0.277033	-0.143749
SEMA4C	54910	-0.272976	-0.0147004	-0.143838
EIF3F	8665	-0.0652228	-0.223949	-0.144586
SPAST	6683	-0.110786	-0.178857	-0.144821
PTGES2	80142	-0.0760181	-0.217431	-0.146725
MTRF1	9617	-0.156349	-0.137463	-0.146906
ZC3HC1	51530	-0.021164	-0.27364	-0.147402
PPWD1	23398	-0.13831	-0.15662	-0.147465
DNAJB1	3337	-0.233014	-0.0620533	-0.147534
GMDS	2762	-0.173867	-0.122905	-0.148386
PHKA2	5256	-0.0553593	-0.242529	-0.148944
RQCD1	9125	-0.110745	-0.187248	-0.148997
SYMPK	8189	-0.111303	-0.187173	-0.149238
POLR2C	5432	-0.174071	-0.125439	-0.149755
PTPN2	5771	-0.235899	-0.0640604	-0.14998
YES1	7525	-0.0865601	-0.214393	-0.150476
GNPDA2	132789	-0.126487	-0.174941	-0.150714
DENND4A	10260	-0.111839	-0.189959	-0.150899
SF1	7536	-0.224127	-0.078079	-0.151103
SEPT9	10801	-0.288541	-0.0137843	-0.151163
PSMC2	5701	-0.0438002	-0.259402	-0.151601
PNKD	25953	-0.183001	-0.124509	-0.153755
CENPC	1060	-0.034884	-0.274992	-0.154938
EEF1E1	9521	-0.153822	-0.157834	-0.155828
UEVLD	55293	-0.273063	-0.0388151	-0.155939
KANK1	23189	-0.291251	-0.0208792	-0.156065
UVSSA	57654	-0.259246	-0.0535671	-0.156407
ARF6	382	-0.000489074	-0.312631	-0.15656
SEPT7	989	-0.117271	-0.196413	-0.156842
EXOC7	23265	-0.0397608	-0.27631	-0.158035
RAVER2	55225	-0.0662342	-0.253066	-0.15965
ARID4B	51742	-0.139145	-0.180966	-0.160056
GNB2L1	10399	-0.22413	-0.0960556	-0.160093
BTAF1	9044	-0.0905921	-0.229721	-0.160157
STRADA	92335	-0.205229	-0.116544	-0.160886
RPL7A	6130	-0.154775	-0.167968	-0.161371
OSCP1	127700	-0.0920006	-0.231776	-0.161888
GAK	2580	-0.138364	-0.185695	-0.16203
NSMCE1	197370	-0.217363	-0.107949	-0.162656
UBE2A	7319	-0.225646	-0.100292	-0.162969
TADA3	10474	-0.146464	-0.180478	-0.163471
RBBP4	5928	-0.072482	-0.254514	-0.163498
SETD1A	9739	-0.26817	-0.0595983	-0.163884
TRAPPC12	51112	-0.22323	-0.106272	-0.164751
EHMT2	10919	-0.266783	-0.0642819	-0.165533
PPP2R5C	5527	-0.300406	-0.031484	-0.165945
RFX1	5989	-0.134068	-0.197938	-0.166003
TAF6L	10629	-0.245102	-0.0882305	-0.166666
LGALSL	29094	-0.154341	-0.179446	-0.166894
XPO4	64328	-0.294836	-0.0393798	-0.167108
NUDT5	11164	-0.315675	-0.0187334	-0.167204
PPP6R1	22870	-0.238505	-0.0972362	-0.16787
POLR3D	661	-0.23703	-0.0989706	-0.168
ITGA6	3655	-0.0575544	-0.279473	-0.168513
KIF13A	63971	-0.139107	-0.198286	-0.168696
TCF20	6942	-0.184497	-0.153556	-0.169026
LCLAT1	253558	-0.191367	-0.147619	-0.169493
GORASP2	26003	-0.0702177	-0.269255	-0.169737
SOD1	6647	-0.0568604	-0.283442	-0.170151
EXOSC9	5393	-0.033539	-0.307322	-0.170431
PTAR1	375743	-0.238295	-0.102881	-0.170588
TIMM21	29090	-0.19891	-0.145216	-0.172063
CHD6	84181	-0.213793	-0.132966	-0.173379
REXO2	25996	-0.274066	-0.0730078	-0.173537
MYO1C	4641	-0.268622	-0.0794776	-0.17405
WHSC1L1	54904	-0.235005	-0.113368	-0.174186
PACS2	23241	-0.0381882	-0.310519	-0.174354
EVPL	2125	-0.208964	-0.140699	-0.174831
HMG20B	10362	-0.129693	-0.220052	-0.174872
ARPC2	10109	-0.282969	-0.0683999	-0.175684
PPHLN1	51535	-0.261732	-0.0898438	-0.175788
NONO	4841	-0.322326	-0.0302015	-0.176264
MRPS2	51116	-0.126164	-0.227475	-0.17682
PSMB5	5693	-0.102059	-0.252256	-0.177158
DCTN4	51164	-0.057247	-0.297098	-0.177172
FAM84B	157638	-0.0362311	-0.319213	-0.177722
CDK5	1020	-0.291401	-0.0680803	-0.179741
EIF2S1	1965	-0.237508	-0.122685	-0.180096
SMAD5	4090	-0.0062571	-0.354972	-0.180614
TRAPPC5	126003	-0.142326	-0.22042	-0.181373
ARF5	381	-0.279844	-0.0830364	-0.18144
SGSM2	9905	-0.0622584	-0.301121	-0.18169
PRDM15	63977	-0.214848	-0.149464	-0.182156
MLX	6945	-0.0812404	-0.283084	-0.182162
PLEKHA5	54477	-0.049288	-0.316425	-0.182857
C2orf47	79568	-0.190377	-0.175689	-0.183033
E2F3	1871	-0.0727425	-0.293437	-0.18309
ITFG1	81533	-0.26736	-0.0988195	-0.18309
NUDT12	83594	-0.0424373	-0.328419	-0.185428
SPATA13	221178	-0.240566	-0.132919	-0.186742
TRMT1L	81627	-0.344421	-0.0300585	-0.187239
HNRNPM	4670	-0.284628	-0.0928601	-0.188744
YTHDF3	253943	-0.36001	-0.0178695	-0.18894
PASK	23178	-0.164903	-0.214247	-0.189575
HNRNPA2B1	3181	-0.130761	-0.24962	-0.19019
VBP1	7411	-0.0597411	-0.321154	-0.190447
DGCR8	54487	-0.087635	-0.293515	-0.190575
PAAF1	80227	-0.144393	-0.237256	-0.190825
ING4	51147	-0.116661	-0.26541	-0.191035
RAB3GAP2	25782	-0.256286	-0.125788	-0.191037
CPD	1362	-0.18781	-0.195357	-0.191583
BCAM	4059	-0.357505	-0.0257902	-0.191648
WWOX	51741	-0.178853	-0.204591	-0.191722
ZMYM6	9204	-0.2518	-0.132353	-0.192076
ATP5S	27109	-0.255883	-0.128286	-0.192085
EZR	7430	-0.190865	-0.193374	-0.19212
BYSL	705	-0.375298	-0.0110144	-0.193156
KIAA1468	57614	-0.0558879	-0.331138	-0.193513
CASC3	22794	-0.23478	-0.152821	-0.1938
EXOC3	11336	-0.110928	-0.277572	-0.19425
NOP10	55505	-0.125369	-0.263968	-0.194669
SBNO1	55206	-0.239106	-0.1507	-0.194903
ESF1	51575	-0.346936	-0.0441892	-0.195563
TMED8	283578	-0.101426	-0.290806	-0.196116
CEP290	80184	-0.337231	-0.0564942	-0.196863
RABEP1	9135	-0.0648988	-0.329431	-0.197165
WIBG	84305	-0.273833	-0.121647	-0.19774
MYO19	80179	-0.00541469	-0.390556	-0.197985
ZDHHC18	84243	-0.163925	-0.232256	-0.19809
EIF4G3	8672	-0.0484167	-0.34805	-0.198233
BACH1	571	-0.204593	-0.195686	-0.20014
ALDH7A1	501	-0.226398	-0.173965	-0.200181
PMPCB	9512	-0.0271335	-0.373858	-0.200495
ETNK1	55500	-0.117292	-0.283787	-0.200539
FAM96A	84191	-0.281508	-0.121156	-0.201332
ATP5I	521	-0.176322	-0.227102	-0.201712
CHKB	1120	-0.100455	-0.302988	-0.201721
EPS15L1	58513	-0.0409022	-0.362638	-0.20177
DIP2A	23181	-0.402668	-0.000873273	-0.201771
MDN1	23195	-0.250608	-0.154408	-0.202508
BAP1	8314	-0.0612623	-0.344309	-0.202786
TRMT2A	27037	-0.174408	-0.231318	-0.202863
UTP6	55813	-0.212752	-0.193322	-0.203037
PTPN23	25930	-0.00677448	-0.401178	-0.203976
PAXBP1	94104	-0.168671	-0.23984	-0.204255
PSMD12	5718	-0.0319149	-0.377305	-0.20461
COX18	285521	-0.398737	-0.0119007	-0.205319
WDFY3	23001	-0.123669	-0.287889	-0.205779
HNRNPA0	10949	-0.0112513	-0.401011	-0.206131
UAP1L1	91373	-0.285428	-0.12689	-0.206159
ATP6V1F	9296	-0.189425	-0.224185	-0.206805
ILKAP	80895	-0.193228	-0.221348	-0.207288
[truncated: 1,550 more rows]

## Sheet: S1D.Metabolomics
Biochemical	Super_Pathway	Sub_Pathway	Log2_Fold_Change_HCT116	Log2_Fold_Change_MCF7	Log2_Fold_Change_Average
N1-methyladenosine	Nucleotide	Purine metabolism, adenine containing	1.80722	1.82536	1.81629
2-arachidonoylglycerophosphoinositol	Lipid	Lysolipid	2.25394	0.649	1.45147
1-arachidonoylglycerophosphoinositol	Lipid	Lysolipid	2.12	0.75849	1.43924
2-oleoylglycerophosphoinositol	Lipid	Lysolipid	1.82381	0.77929	1.30155
2-oleoylglycerophosphoserine	Lipid	Lysolipid	1.88876	0.636925	1.26284
1-oleoylglycerophosphoserine	Lipid	Lysolipid	1.71506	0.723313	1.21919
1-oleoylglycerophosphoinositol	Lipid	Lysolipid	1.52489	0.82949	1.17719
isovalerylcarnitine	Amino acid	Valine, leucine and isoleucine metabolism	1.89966	0.434373	1.16702
1-palmitoleoylglycerophosphoinositol	Lipid	Lysolipid	1.43445	0.747916	1.09118
1-palmitoleoylglycerophosphoethanolamine	Lipid	Lysolipid	1.35222	0.816747	1.08448
2-palmitoleoylglycerophosphoinositol	Lipid	Lysolipid	1.65788	0.497633	1.07776
1-stearoylglycerophosphoinositol	Lipid	Lysolipid	1.56075	0.586531	1.07364
2-oleoylglycerophosphoethanolamine	Lipid	Lysolipid	1.04416	0.958536	1.00135
1-linoleoylglycerophosphoinositol	Lipid	Lysolipid	1.50598	0.412584	0.959282
1-palmitoylglycerophosphoinositol	Lipid	Lysolipid	1.00704	0.889593	0.948318
1-oleoylglycerophosphoethanolamine	Lipid	Lysolipid	1.0052	0.839826	0.922515
2'-deoxyinosine	Nucleotide	Purine metabolism, (hypo)xanthine/inosine containing	1.75771	0.059954	0.908834
4-methyl-2-oxopentanoate	Amino acid	Valine, leucine and isoleucine metabolism	0.538139	1.26372	0.900929
1-arachidonoylglycerophosphoethanolamine	Lipid	Lysolipid	0.796322	0.932183	0.864252
2-palmitoylglycerophosphoethanolamine	Lipid	Lysolipid	0.940946	0.731992	0.836469
ophthalmate	Amino acid	Glutathione metabolism	1.21093	0.43104	0.820987
3-methyl-2-oxovalerate	Amino acid	Valine, leucine and isoleucine metabolism	0.551602	1.01615	0.783875
adenosine 3'-monophosphate (3'-AMP)	Nucleotide	Purine metabolism, adenine containing	0.456112	1.10819	0.782151
3-phosphoserine	Amino acid	Glycine, serine and threonine metabolism	0.381457	1.16188	0.771668
N1-methylguanosine	Nucleotide	Purine metabolism, guanine containing	0.792992	0.745069	0.769031
oleic ethanolamide	Lipid	Endocannabinoid	0.684869	0.849326	0.767097
taurocholate	Lipid	Bile acid metabolism	1.50594	0.00911852	0.75753
2-hydroxypalmitate	Lipid	Fatty acid, monohydroxy	1.25476	0.245288	0.750026
1-palmitoylglycerophosphoethanolamine	Lipid	Lysolipid	0.706565	0.743915	0.72524
nicotinamide adenine dinucleotide phosphate (NADP+)	Cofactors and vitamins	Nicotinate and nicotinamide metabolism	0.702208	0.659839	0.681023
biopterin	Cofactors and vitamins	Folate metabolism	1.1839	0.0821502	0.633023
pseudouridine	Nucleotide	Pyrimidine metabolism, uracil containing	0.518054	0.679554	0.598804
adrenate (22:4n6)	Lipid	Long chain fatty acid	0.400111	0.733235	0.566673
acetyl CoA	Cofactors and vitamins	Pantothenate and CoA metabolism	0.65145	0.406625	0.529037
stearoyl sphingomyelin	Lipid	Sphingolipid	1.02332	0.0252291	0.524273
gamma-glutamylvaline	Peptide	gamma-glutamyl	0.432598	0.613458	0.523028
N6-carbamoylthreonyladenosine	Nucleotide	Purine metabolism, guanine containing	0.969484	0.0430942	0.506289
folate	Cofactors and vitamins	Folate metabolism	0.484087	0.519929	0.502008
gamma-glutamylisoleucine	Peptide	gamma-glutamyl	0.63172	0.366707	0.499214
1-palmitoylplasmenylethanolamine	Lipid	Lysolipid	0.916256	0.0722698	0.494263
phenol sulfate	Amino acid	Phenylalanine & tyrosine metabolism	0.305521	0.604016	0.454768
1-stearoylglycerophosphocholine	Lipid	Lysolipid	0.0229246	0.862702	0.442814
palmitoyl ethanolamide	Lipid	Endocannabinoid	0.444865	0.439076	0.441971
gamma-glutamylleucine	Peptide	gamma-glutamyl	0.524584	0.353168	0.438876
gamma-glutamylthreonine	Peptide	gamma-glutamyl	0.411024	0.452658	0.431841
arachidonate (20:4n6)	Lipid	Long chain fatty acid	0.16119	0.691129	0.42616
isobutyrylcarnitine	Amino acid	Valine, leucine and isoleucine metabolism	0.511569	0.319539	0.415554
2-palmitoylglycerol (2-monopalmitin)	Lipid	Monoacylglycerol	0.788682	0.0398237	0.414253
myristoleate (14:1n5)	Lipid	Long chain fatty acid	0.571259	0.196068	0.383664
docosahexaenoate (DHA; 22:6n3)	Lipid	Essential fatty acid	0.15625	0.610696	0.383473
2-methylbutyroylcarnitine	Amino acid	Valine, leucine and isoleucine metabolism	0.49638	0.268352	0.382366
docosapentaenoate (n3 DPA; 22:5n3)	Lipid	Essential fatty acid	0.224548	0.527422	0.375985
phenol red	Xenobiotics	Chemical	0.488341	0.244779	0.36656
15-methylpalmitate (isobar with 2-methylpalmitate)	Lipid	Fatty acid, branched	0.169946	0.530053	0.349999
myo-inositol	Lipid	Inositol metabolism	0.406825	0.28248	0.344652
adenosine 2'-monophosphate (2'-AMP)	Nucleotide	Purine metabolism, adenine containing	0.262055	0.419375	0.340715
dihomo-linolenate (20:3n3 or n6)	Lipid	Essential fatty acid	0.257724	0.397196	0.32746
palmitoleate (16:1n7)	Lipid	Long chain fatty acid	0.558777	0.084605	0.321691
xanthine	Nucleotide	Purine metabolism, (hypo)xanthine/inosine containing	0.610525	0.011758	0.311141
hippurate	Xenobiotics	Benzoate metabolism	0.4691	0.151676	0.310388
2-hydroxystearate	Lipid	Fatty acid, monohydroxy	0.486112	0.106896	0.296504
adenosine 5'diphosphoribose	Cofactors and vitamins	Nicotinate and nicotinamide metabolism	0.00749132	0.56829	0.28789
10-nonadecenoate (19:1n9)	Lipid	Long chain fatty acid	0.313743	0.259983	0.286863
6'-sialyllactose	Carbohydrate	Fructose, mannose, galactose, starch, and sucrose metabolism	0.545405	0.0269194	0.286162
p-cresol sulfate	Amino acid	Phenylalanine & tyrosine metabolism	0.54883	0.0233957	0.286113
dihomo-linoleate (20:2n6)	Lipid	Long chain fatty acid	0.522601	0.045212	0.283906
4-acetamidobutanoate	Amino acid	Guanidino and acetamido metabolism	0.419142	0.14725	0.283196
scyllo-inositol	Lipid	Inositol metabolism	0.374304	0.183349	0.278827
penicillin G	Xenobiotics	Drug	0.405483	0.147482	0.276483
serine	Amino acid	Glycine, serine and threonine metabolism	0.181874	0.358831	0.270352
tiglyl carnitine	Amino acid	Valine, leucine and isoleucine metabolism	0.258465	0.279996	0.269231
nonadecanoate (19:0)	Lipid	Long chain fatty acid	0.137302	0.397761	0.267531
guanosine 5'- monophosphate (5'-GMP)	Nucleotide	Purine metabolism, guanine containing	0.160121	0.355132	0.257627
pyroglutamylvaline	Peptide	Dipeptide	0.381214	0.124469	0.252842
N-acetylputrescine	Amino acid	Polyamine metabolism	0.418148	0.0617858	0.239967
heptanoate (7:0)	Lipid	Medium chain fatty acid	0.240736	0.238116	0.239426
prolylglycine	Peptide	Dipeptide	0.203564	0.268189	0.235876
2-ethylhexanoate	Xenobiotics	Chemical	0.293091	0.170662	0.231876
urea	Amino acid	Urea cycle; arginine-, proline-, metabolism	0.199707	0.258681	0.229194
pantothenate	Cofactors and vitamins	Pantothenate and CoA metabolism	0.355263	0.0973985	0.226331
pelargonate (9:0)	Lipid	Medium chain fatty acid	0.214923	0.226665	0.220794
lathosterol	Lipid	Sterol/Steroid	0.265408	0.173122	0.219265
laurate (12:0)	Lipid	Medium chain fatty acid	0.194687	0.22696	0.210824
pyrophosphate (PPi)	Energy	Oxidative phosphorylation	0.239264	0.179889	0.209576
caprylate (8:0)	Lipid	Medium chain fatty acid	0.18254	0.228914	0.205727
undecanoate (11:0)	Lipid	Medium chain fatty acid	0.284283	0.116689	0.200486
cytidine 5'-monophosphate (5'-CMP)	Nucleotide	Pyrimidine metabolism, cytidine containing	0.178588	0.217873	0.19823
palmitoyl sphingomyelin	Lipid	Sphingolipid	0.349638	0.0410538	0.195346
phenylacetylglycine	Amino acid	Phenylalanine & tyrosine metabolism	0.119908	0.270468	0.195188
caprate (10:0)	Lipid	Medium chain fatty acid	0.225463	0.159413	0.192438
phosphate	Energy	Oxidative phosphorylation	0.0488562	0.333969	0.191413
linoleate (18:2n6)	Lipid	Essential fatty acid	0.324439	0.0580027	0.191221
margarate (17:0)	Lipid	Long chain fatty acid	0.0704092	0.302333	0.186371
creatinine	Amino acid	Creatine metabolism	0.239698	0.115997	0.177847
10-heptadecenoate (17:1n7)	Lipid	Long chain fatty acid	0.217607	0.129459	0.173533
glycerol	Lipid	Glycerolipid metabolism	0.109663	0.237027	0.173345
3-hydroxybutyrate (BHBA)	Lipid	Ketone bodies	0.105598	0.237066	0.171332
17-methylstearate	Lipid	Fatty acid, branched	0.286614	0.0483608	0.167487
N-formylmethionine	Amino acid	Cysteine, methionine, SAM, taurine metabolism	0.125812	0.199754	0.162783
stearate (18:0)	Lipid	Long chain fatty acid	0.0791101	0.242831	0.160971
nicotinamide	Cofactors and vitamins	Nicotinate and nicotinamide metabolism	0.130638	0.170207	0.150423
cholesterol	Lipid	Sterol/Steroid	0.0940478	0.197387	0.145718
3-(4-hydroxyphenyl)lactate	Amino acid	Phenylalanine & tyrosine metabolism	0.0862564	0.191422	0.138839
myristate (14:0)	Lipid	Long chain fatty acid	0.193491	0.0743273	0.133909
linolenate [alpha or gamma; (18:3n3 or 6)]	Lipid	Essential fatty acid	0.209289	0.0252666	0.117278
palmitate (16:0)	Lipid	Long chain fatty acid	0.171178	0.0607369	0.115957
flavin adenine dinucleotide (FAD)	Cofactors and vitamins	Riboflavin metabolism	0.0902484	0.0508592	0.0705538
4-guanidinobutanoate	Amino acid	Guanidino and acetamido metabolism	0.00135744	0.127413	0.0643853
coenzyme A	Cofactors and vitamins	Pantothenate and CoA metabolism	0.0764343	0.0454446	0.0609395
urate	Nucleotide	Purine metabolism, urate metabolism	0.0130736	0.0587416	0.0359076
fructose	Carbohydrate	Fructose, mannose, galactose, starch, and sucrose metabolism	0.0291215	0.0167526	0.0229371
valylglycine	Peptide	Dipeptide	0.00507604	0.00540061	0.00523833
kynurenine	Amino acid	Tryptophan metabolism	-0.0231127	-0.0318174	-0.027465
N-acetylglutamate	Amino acid	Glutamate metabolism	-0.0468831	-0.0337868	-0.040335
cyclo(gly-phe)	Peptide	Dipeptide	-0.0181111	-0.0628908	-0.0405009
valine	Amino acid	Valine, leucine and isoleucine metabolism	-0.00810095	-0.0806068	-0.0443539
N-acetyl-aspartyl-glutamate (NAAG)	Amino acid	Glutamate metabolism	-0.00771118	-0.0869922	-0.0473517
methionine	Amino acid	Cysteine, methionine, SAM, taurine metabolism	-0.0244963	-0.0740524	-0.0492743
phenylalanylserine	Peptide	Dipeptide	-0.132775	-0.00920276	-0.0709887
threitol	Carbohydrate	Nucleotide sugars, pentose metabolism	-0.0309391	-0.111582	-0.0712605
lactate	Carbohydrate	Glycolysis, gluconeogenesis, pyruvate metabolism	-0.141453	-0.0183751	-0.079914
C-glycosyltryptophan	Amino acid	Tryptophan metabolism	-0.0923296	-0.0686331	-0.0804813
leucylglycine	Peptide	Dipeptide	-0.153718	-0.0140362	-0.0838772
pyroglutamine	Amino acid	Glutamate metabolism	-0.107314	-0.0704808	-0.0888972
guanosine	Nucleotide	Purine metabolism, guanine containing	-0.150684	-0.0480914	-0.0993876
N-acetylornithine	Amino acid	Urea cycle; arginine-, proline-, metabolism	-0.00757497	-0.199428	-0.103502
phenylalanine	Amino acid	Phenylalanine & tyrosine metabolism	-0.00259482	-0.211333	-0.106964
aspartylaspartate	Peptide	Dipeptide	-0.0362436	-0.191115	-0.11368
leucylalanine	Peptide	Dipeptide	-0.0467635	-0.208584	-0.127674
arabitol	Carbohydrate	Nucleotide sugars, pentose metabolism	-0.0779623	-0.179045	-0.128503
glycylproline	Peptide	Dipeptide	-0.188553	-0.0709726	-0.129763
N-acetylmethionine	Amino acid	Cysteine, methionine, SAM, taurine metabolism	-0.0846464	-0.194295	-0.139471
threonylphenylalanine	Peptide	Dipeptide	-0.202619	-0.0830339	-0.142826
creatine	Amino acid	Creatine metabolism	-0.165479	-0.13897	-0.152225
isoleucylserine	Peptide	Dipeptide	-0.0631845	-0.242187	-0.152686
uridine monophosphate (5' or 3')	Nucleotide	Pyrimidine metabolism, uracil containing	-0.131843	-0.18082	-0.156331
cytidine 5'-diphosphocholine	Lipid	Glycerolipid metabolism	-0.104214	-0.21484	-0.159527
xylonate	Carbohydrate	Nucleotide sugars, pentose metabolism	-0.117059	-0.204178	-0.160619
beta-alanine	Amino acid	Alanine and aspartate metabolism	-0.304712	-0.0182037	-0.161458
glycyltyrosine	Peptide	Dipeptide	-0.167472	-0.167873	-0.167672
inosine	Nucleotide	Purine metabolism, (hypo)xanthine/inosine containing	-0.179294	-0.165577	-0.172436
hexanoylcarnitine	Lipid	Carnitine metabolism	-0.0654846	-0.281643	-0.173564
nicotinamide adenine dinucleotide (NAD+)	Cofactors and vitamins	Nicotinate and nicotinamide metabolism	-0.0645252	-0.290145	-0.177335
3-hydroxyisobutyrate	Amino acid	Valine, leucine and isoleucine metabolism	-0.247603	-0.107176	-0.17739
alanylphenylalanine	Peptide	Dipeptide	-0.0775241	-0.2971	-0.187312
adenine	Nucleotide	Purine metabolism, adenine containing	-0.0668727	-0.309062	-0.187967
fumarate	Energy	Krebs cycle	-0.0121394	-0.368385	-0.190262
glycerol 2-phosphate	Xenobiotics	Chemical	-0.185707	-0.196921	-0.191314
erythritol	Xenobiotics	Sugar, sugar substitute, starch	-0.184916	-0.202541	-0.193728
glycine	Amino acid	Glycine, serine and threonine metabolism	-0.097461	-0.292624	-0.195042
UDP-glucose	Carbohydrate	Nucleotide sugars, pentose metabolism	-0.0145306	-0.37684	-0.195685
S-adenosylhomocysteine (SAH)	Amino acid	Cysteine, methionine, SAM, taurine metabolism	-0.150396	-0.242602	-0.196499
betaine	Amino acid	Glycine, serine and threonine metabolism	-0.166111	-0.22803	-0.197071
tryptophan	Amino acid	Tryptophan metabolism	-0.00991518	-0.385343	-0.197629
deoxycarnitine	Lipid	Carnitine metabolism	-0.161929	-0.236169	-0.199049
pipecolate	Amino acid	Lysine metabolism	-0.225216	-0.182764	-0.20399
trans-4-hydroxyproline	Amino acid	Urea cycle; arginine-, proline-, metabolism	-0.189942	-0.218755	-0.204348
tyrosylvaline	Peptide	Dipeptide	-0.330105	-0.0827151	-0.20641
glycylglycine	Peptide	Dipeptide	-0.0108849	-0.404085	-0.207485
N-acetylneuraminate	Carbohydrate	Aminosugars metabolism	-0.173779	-0.242995	-0.208387
2-aminoadipate	Amino acid	Lysine metabolism	-0.101618	-0.317204	-0.209411
glutamine	Amino acid	Glutamate metabolism	-0.126683	-0.292576	-0.209629
serylleucine	Peptide	Dipeptide	-0.179699	-0.251893	-0.215796
phenylalanylalanine	Peptide	Dipeptide	-0.3121	-0.126728	-0.219414
glutamate, gamma-methyl ester	Amino acid	Glutamate metabolism	-0.241048	-0.198502	-0.219775
adenosine 3',5'-cyclic monophosphate (cAMP)	Nucleotide	Purine metabolism, adenine containing	-0.252652	-0.191315	-0.221984
valylasparagine	Peptide	Dipeptide	-0.121959	-0.322375	-0.222167
phenylalanylglutamate	Peptide	Dipeptide	-0.288981	-0.158623	-0.223802
valylserine	Peptide	Dipeptide	-0.164446	-0.285117	-0.224782
glycylisoleucine	Peptide	Dipeptide	-0.137423	-0.318332	-0.227877
glycylserine	Peptide	Dipeptide	-0.0885962	-0.402517	-0.245557
glycylleucine	Peptide	Dipeptide	-0.127499	-0.372268	-0.249884
3-aminoisobutyrate	Nucleotide	Pyrimidine metabolism, thymine containing; Valine, leucine and isoleucine metabolism/	-0.0795579	-0.421942	-0.25075
spermidine	Amino acid	Polyamine metabolism	-0.347113	-0.157529	-0.252321
2-aminobutyrate	Amino acid	Butanoate metabolism	-0.0213292	-0.488128	-0.254728
leucylleucine	Peptide	Dipeptide	-0.271554	-0.238923	-0.255239
allantoin	Nucleotide	Purine metabolism, urate metabolism	-0.232548	-0.286002	-0.259275
serylphenyalanine	Peptide	Dipeptide	-0.168892	-0.366552	-0.267722
glycylphenylalanine	Peptide	Dipeptide	-0.279588	-0.268688	-0.274138
valylleucine	Peptide	Dipeptide	-0.439859	-0.138379	-0.289119
3-dehydrocarnitine	Lipid	Carnitine metabolism	-0.477138	-0.107964	-0.292551
agmatine	Amino acid	Polyamine metabolism	-0.277012	-0.339041	-0.308026
asparagine	Amino acid	Alanine and aspartate metabolism	-0.19562	-0.42517	-0.310395
glutathione, reduced (GSH)	Amino acid	Glutathione metabolism	-0.412208	-0.215774	-0.313991
putrescine	Amino acid	Polyamine metabolism	-0.481932	-0.153399	-0.317666
malate	Energy	Krebs cycle	-0.210209	-0.477644	-0.343927
phytosphingosine	Lipid	Sphingolipid	-0.0879001	-0.603503	-0.345701
S-methylcysteine	Amino acid	Cysteine, methionine, SAM, taurine metabolism	-0.0899119	-0.640035	-0.364973
phenylalanylleucine	Peptide	Dipeptide	-0.562184	-0.199198	-0.380691
3'-dephosphocoenzyme A	Cofactors and vitamins	Pantothenate and CoA metabolism	-0.591417	-0.171897	-0.381657
threonine	Amino acid	Glycine, serine and threonine metabolism	-0.00934682	-0.757517	-0.383432
proline	Amino acid	Urea cycle; arginine-, proline-, metabolism	-0.234766	-0.540793	-0.38778
acetylcarnitine	Lipid	Carnitine metabolism	-0.505312	-0.270903	-0.388107
adenylosuccinate	Nucleotide	Purine metabolism, adenine containing	-0.160905	-0.622645	-0.391775
alanylleucine	Peptide	Dipeptide	-0.398699	-0.386929	-0.392814
1-methylhistidine	Amino acid	Histidine metabolism	-0.0586886	-0.730894	-0.394791
thiamin (Vitamin B1)	Cofactors and vitamins	Thiamine metabolism	-0.0802331	-0.737795	-0.409014
aspartate	Amino acid	Alanine and aspartate metabolism	-0.0369752	-0.781747	-0.409361
sphinganine	Lipid	Sphingolipid	-0.658106	-0.228821	-0.443463
cadaverine	Amino acid	Lysine metabolism	-0.14731	-0.749434	-0.448372
phosphoethanolamine	Lipid	Glycerolipid metabolism	-0.1274	-0.770058	-0.448729
glycerophosphoethanolamine	Lipid	Glycerolipid metabolism	-0.57416	-0.339165	-0.456663
erythronate	Carbohydrate	Aminosugars metabolism	-0.109451	-0.805316	-0.457384
alanylvaline	Peptide	Dipeptide	-0.269538	-0.657741	-0.46364
ornithine	Amino acid	Urea cycle; arginine-, proline-, metabolism	-0.26795	-0.709788	-0.488869
gamma-aminobutyrate (GABA)	Amino acid	Glutamate metabolism	-0.839693	-0.206963	-0.523328
cysteinylglycine	Peptide	Dipeptide	-0.421563	-0.700784	-0.561174
sedoheptulose-7-phosphate	Carbohydrate	Nucleotide sugars, pentose metabolism	-1.09577	-0.0702781	-0.583022
Isobar: UDP-acetylglucosamine, UDP-acetylgalactosamine	Carbohydrate	Aminosugars metabolism	-0.241288	-0.937671	-0.589479
succinate	Energy	Krebs cycle	-0.461388	-0.73794	-0.599664
UDP-glucuronate	Carbohydrate	Nucleotide sugars, pentose metabolism	-0.242949	-1.00208	-0.622513
glutamate	Amino acid	Glutamate metabolism	-0.303357	-1.02425	-0.663804
argininosuccinate	Amino acid	Urea cycle; arginine-, proline-, metabolism	-0.129908	-1.23498	-0.682444
1-oleoylglycerol (1-monoolein)	Lipid	Monoacylglycerol	-1.17773	-0.255144	-0.716439
cytidine-5'-diphosphoethanolamine	Lipid	Glycerolipid metabolism	-0.29258	-1.21217	-0.752376
glycerate	Carbohydrate	Glycolysis, gluconeogenesis, pyruvate metabolism	-0.401984	-1.18151	-0.791746
mannose-6-phosphate	Carbohydrate	Fructose, mannose, galactose, starch, and sucrose metabolism	-1.24119	-0.353925	-0.797559
AICA ribonucleotide	Nucleotide	Purine metabolism, (hypo)xanthine/inosine containing	-0.931255	-1.00495	-0.968101
stearoylcarnitine	Lipid	Carnitine metabolism	-1.56982	-0.388337	-0.979076
cysteine	Amino acid	Cysteine, methionine, SAM, taurine metabolism	-0.604174	-1.62707	-1.11562
N-acetylglucosamine 6-phosphate	Carbohydrate	Aminosugars metabolism	-0.146844	-2.10854	-1.12769
nicotinamide adenine dinucleotide reduced (NADH)	Cofactors and vitamins	Nicotinate and nicotinamide metabolism	-0.699863	-1.61935	-1.15961
palmitoylcarnitine	Lipid	Carnitine metabolism	-2.1968	-0.75861	-1.47771
oleoylcarnitine	Lipid	Carnitine metabolism	-2.28433	-0.796039	-1.54019
glucose-6-phosphate (G6P)	Carbohydrate	Glycolysis, gluconeogenesis, pyruvate metabolism	-3.14606	-0.234891	-1.69047
glucose 1-phosphate	Carbohydrate	Glycolysis, gluconeogenesis, pyruvate metabolism	-3.21913	-0.251979	-1.73555

## Sheet: S1E.Secreted_Proteins
Protein	Log2_Fold_Change_HCT116	Log2_Fold_Change_MCF7	Log2_Fold_Change_Average
WISP1	1.98	0.51	1.25
WIF1	1.98	0.32	1.15
TNFRSF10D	1.96	0.31	1.13
TNFRSF10B	1.85	0.38	1.12
TRADD	1.59	0.61	1.1
TNFSF10	1.69	0.5	1.1
TNFRSF10A	1.78	0.39	1.09
FIGF	1.79	0.38	1.08
EDA2R	1.7	0.46	1.08
TNFRSF10C	2	0.12	1.06
TNFSF15	1.88	0.22	1.05
VEGFC	1.56	0.52	1.04
VEGFB	1.45	0.58	1.01
TNFRSF1B	1.36	0.47	0.91
ACVR1B	0.45	1.22	0.84
LUM	0.91	0.76	0.83
INHBA	0.32	1.29	0.81
BIK	0.27	1.35	0.81
ITM2B	0.89	0.71	0.8
LTK	1.06	0.55	0.8
FLT4	1.17	0.4	0.78
CCL21	0.69	0.84	0.77
ACVR1	0.19	1.36	0.77
INHBB	0.14	1.33	0.74
TNFRSF1A	1.14	0.34	0.74
CDH5	1.2	0.25	0.73
ITK	0.99	0.42	0.71
CXCL14	0.87	0.51	0.69
PTHLH	0.63	0.73	0.68
TNFRSF17	0.69	0.62	0.65
PGA3	0.67	0.63	0.65
VCAM1	1	0.29	0.65
LTA	0.95	0.32	0.64
KLK2	0.5	0.76	0.63
LYN	0.73	0.54	0.63
PI3	0.96	0.3	0.63
WT1	1.16	0.1	0.63
PTPRD	0.45	0.79	0.62
SNCG	0.75	0.5	0.62
ACVR2B	0.5	0.73	0.61
ANGPT2	1.08	0.14	0.61
BMP8B	0.89	0.34	0.61
NTNG2	0.74	0.47	0.61
DEFB1	0.26	0.94	0.6
PTH	0.56	0.63	0.6
ANGPT4	1.07	0.12	0.59
CLC	0.26	0.91	0.59
ITGAV	1.01	0.17	0.59
KDR	0.95	0.23	0.59
MSMB	0.6	0.57	0.58
SERPINE1	0.45	0.7	0.58
BMP7	0.82	0.31	0.57
LTF	0.85	0.28	0.57
PTN	0.42	0.73	0.57
SERPINA1	0.42	0.72	0.57
TRA-1-60	0.92	0.23	0.57
XIAP	0.89	0.24	0.57
ZAP70	0.71	0.43	0.57
ANGPT1	1.08	0.04	0.56
GH2	0.6	0.51	0.56
TGFBR2	1.09	0.02	0.56
PGLYRP1	0.43	0.66	0.55
TF	0.92	0.19	0.55
PGC	0.51	0.54	0.53
TRA-1-81	0.92	0.14	0.53
AZGP1	0.7	0.36	0.53
ANXA7	0.99	0.05	0.52
CD27	0.43	0.61	0.52
CSK	0.43	0.61	0.52
TMEFF1	0.66	0.39	0.52
ANG	0.96	0.07	0.51
SERPINA3	0.3	0.72	0.51
CD14	0.44	0.56	0.5
CHRDL2	0.44	0.56	0.5
NTN4	0.6	0.41	0.5
SLC6A4	0.29	0.71	0.5
TGFB3	0.84	0.15	0.49
TRPC1	0.33	0.65	0.49
APC	0.69	0.27	0.48
CCR9	0.18	0.78	0.48
CHRDL1	0.18	0.78	0.48
TAC1	0.57	0.38	0.48
VASN	0.65	0.32	0.48
TGFB2	0.67	0.27	0.47
TLR4	0.45	0.5	0.47
TNF	0.81	0.14	0.47
SERPINF1	0.39	0.53	0.46
PIM2	0.18	0.74	0.46
CXCL16	0.29	0.6	0.45
DKK1	0.04	0.85	0.45
PI16	0.19	0.71	0.45
KLK4	0.23	0.67	0.45
SERPINA4	0.33	0.57	0.45
ASPH	0.83	0.05	0.44
BGN	0.83	0.05	0.44
LRG1	0.85	0.03	0.44
SOX2	0.1	0.79	0.44
FN1	0.22	0.64	0.43
TGF-beta 5	0.77	0.09	0.43
TMEFF2	0.69	0.17	0.43
TYRO3	0.04	0.79	0.42
NES	0.5	0.35	0.42
PTK2B	0.29	0.56	0.42
TLR3	0.23	0.61	0.42
CNTF	0.16	0.66	0.41
PIK3R1	0.22	0.6	0.41
SOST	0.39	0.42	0.41
ADAMTS1	0.67	0.13	0.4
NET1	0.52	0.28	0.4
BMP4	0.15	0.63	0.39
BMP5	0.37	0.41	0.39
NPY	0.41	0.38	0.39
TAF4	0.24	0.52	0.38
NTRK2	0.27	0.48	0.38
ADAMTSL2	0.19	0.56	0.37
BMP15	0.61	0.14	0.37
GDF10	0.01	0.74	0.37
HCK	0.66	0.08	0.37
KLK5	0.24	0.5	0.37
NF1	0.22	0.52	0.37
TFF1	0.25	0.49	0.37
BMP6	0.45	0.27	0.36
FOXN3	0.63	0.08	0.35
IRF6	0.62	0.08	0.35
VDR	0.52	0.19	0.35
MTDH	0.25	0.44	0.34
SOX17	0.18	0.49	0.34
SERPINA5	0.3	0.36	0.33
SSTR2	0.01	0.65	0.33
ALCAM	0.63	0.01	0.32
NUCB2	0.45	0.19	0.32
PYY	0.08	0.56	0.32
TEC	0.18	0.46	0.32
TRPC6	0.12	0.51	0.32
FGFR3	0.29	0.33	0.31
NME1	0.02	0.59	0.31
PDX1	0.01	0.61	0.31
ACVR2A	0.37	0.22	0.29
SAA1	0.36	0.21	0.29
CFD	0.03	0.54	0.28
ADAM17	0.17	0.4	0.28
PYGB	0.37	0.17	0.27
TGFB1	0.36	0.17	0.26
EPHA4	0.43	0.07	0.25
FGFBP1	0.15	0.35	0.25
IBSP	0.06	0.44	0.25
NANOG	0.24	0.26	0.25
MME	0.26	0.25	0.25
TFPI	0.01	0.48	0.25
TGFA	0.16	0.34	0.25
ADAMTS13	0.24	0.24	0.24
CNTFR	0.1	0.39	0.24
FASLG	0.05	0.42	0.24
GMNN	0.45	0.04	0.24
AGT	0.27	0.21	0.24
TRPM7	0.06	0.41	0.24
AFM	0.04	0.42	0.23
S100A12	0.05	0.4	0.23
PLAUR	0.29	0.17	0.23
AGRP	0.35	0.09	0.22
Creatinine	0.2	0.23	0.22
WFDC2	0.21	0.24	0.22
ROR1	0.2	0.25	0.22
APCS	0.21	0.21	0.21
DDR2	0.27	0.16	0.21
UMOD	0.28	0.14	0.21
FGF2	0.06	0.34	0.2
Fibrinopeptide A	0.12	0.29	0.2
FZD4	0.12	0.28	0.2
CST3	0.34	0.04	0.19
FGFR4	0.22	0.15	0.19
HSPA9	0.08	0.29	0.19
GPC3	0.14	0.23	0.18
NELL2	0.19	0.18	0.18
GPI	0.01	0.33	0.17
ADIPOQ	0.25	0.08	0.16
EPHA5	0.23	0.07	0.15
GPR39	0.04	0.26	0.15
FZD5	0.2	0.09	0.14
HAMP	0.21	0.08	0.14
ROR2	0.01	0.24	0.13
TXNIP	0.09	0.17	0.13
TSLP	0.03	0.22	0.12
TXK	0.1	0.13	0.12
GPC5	0.13	0.08	0.1
TYK2	0.11	0.09	0.1
IGFBP5	0.05	0.12	0.08
S100 A8/A9	0.03	0.13	0.08
SCARB2	0.04	0.1	0.07
FGFR1	0.01	0.01	0.01
IL3RA	-0.01	-0.04	-0.03
CNTN1	-0.02	-0.08	-0.05
IGFBP1	-0.08	-0.04	-0.06
APLN	-0.12	-0.03	-0.08
NAMPT	-0.12	-0.03	-0.08
OSM	-0.03	-0.17	-0.1
EPHA6	-0.02	-0.21	-0.12
VIPR2	-0.16	-0.09	-0.12
ADAMTS15	-0.18	-0.12	-0.15
IGFBP2	-0.05	-0.24	-0.15
VGF	-0.16	-0.13	-0.15
IL17A	-0.03	-0.28	-0.16
HCRTR1	-0.25	-0.07	-0.16
BTK	-0.16	-0.19	-0.17
IL2RB	-0.33	-0.03	-0.18
IL2	-0.37	-0.03	-0.2
CD80	-0.37	-0.05	-0.21
HCRTR2	-0.23	-0.2	-0.21
IL15RA	-0.13	-0.3	-0.22
IL16	-0.15	-0.28	-0.22
LRP1	-0.01	-0.43	-0.22
TDGF1	-0.06	-0.41	-0.23
IL2RA	-0.41	-0.04	-0.23
MMP9	-0.17	-0.29	-0.23
CUTA	-0.04	-0.45	-0.24
IL27	-0.03	-0.45	-0.24
CCND1	-0.13	-0.37	-0.25
HSPE1	-0.19	-0.3	-0.25
PRSS27	-0.43	-0.06	-0.25
MMP7	-0.36	-0.14	-0.25
KLK10	-0.25	-0.27	-0.26
KLK11	-0.25	-0.28	-0.26
AXL	-0.29	-0.25	-0.27
PTPRC	-0.36	-0.2	-0.28
LGALS1	-0.14	-0.41	-0.28
IL15	-0.24	-0.33	-0.28
IL1RN	-0.51	-0.05	-0.28
IL24	-0.1	-0.46	-0.28
TNFSF14	-0.24	-0.32	-0.28
LCN1	-0.16	-0.39	-0.28
MMP8	-0.36	-0.2	-0.28
ARTN	-0.06	-0.52	-0.29
ADAMTS17	-0.53	-0.06	-0.3
IL6	-0.03	-0.56	-0.3
EGF	-0.25	-0.38	-0.32
APEX1	-0.49	-0.17	-0.33
TG	-0.5	-0.16	-0.33
Endorphin Beta	-0.15	-0.53	-0.34
IL13RA2	-0.42	-0.26	-0.34
LIFR	-0.39	-0.28	-0.34
EGFR	-0.3	-0.43	-0.36
PTK2	-0.18	-0.58	-0.38
LGALS7	-0.09	-0.67	-0.38
IL12RB2	-0.66	-0.11	-0.38
IL13RA1	-0.5	-0.26	-0.38
IL13	-0.58	-0.2	-0.39
IL23R	-0.25	-0.53	-0.39
MMP2	-0.7	-0.08	-0.39
IL6R	-0.06	-0.77	-0.41
MMP3	-0.6	-0.21	-0.41
TOPORS	-0.79	-0.03	-0.41
ANPEP	-0.68	-0.16	-0.42
IGF2R	-0.05	-0.79	-0.42
CCR1	-0.02	-0.85	-0.43
CD44	-0.05	-0.8	-0.43
F2	-0.26	-0.6	-0.43
HMOX1	-0.37	-0.48	-0.43
FGF6	-0.33	-0.55	-0.44
GAS1	-0.32	-0.56	-0.44
IL22RA1	-0.5	-0.39	-0.44
CFH	-0.3	-0.6	-0.45
IL21	-0.75	-0.14	-0.45
IL23A	-0.44	-0.47	-0.45
LCN2	-0.24	-0.65	-0.45
TNK1	-0.84	-0.06	-0.45
LIF	-0.64	-0.28	-0.46
EDNRA	-0.63	-0.31	-0.47
PROK1	-0.1	-0.86	-0.48
IL17F	-0.04	-0.93	-0.48
GAST	-0.52	-0.48	-0.5
HSPB6	-0.54	-0.51	-0.52
HSPB1	-0.51	-0.53	-0.52
IL7	-0.19	-0.85	-0.52
FAP	-0.53	-0.52	-0.53
CCL15	-1.05	-0.01	-0.53
HAVCR1	-0.87	-0.19	-0.53
ENO2	-1.09	-0.01	-0.55
ITGAL	-0.85	-0.26	-0.55
IL7R	-0.17	-0.94	-0.56
IL1A	-0.08	-1.15	-0.61
KLK14	-0.7	-0.52	-0.61
DAND5	-0.12	-1.12	-0.62
IL22RA2	-0.83	-0.41	-0.62
GATA3	-0.75	-0.5	-0.63
CSF3	-0.21	-1.05	-0.63
IL8	-0.08	-1.18	-0.63
LEP	-1.1	-0.16	-0.63
MMP1	-1.12	-0.19	-0.66
F13B	-0.1	-1.24	-0.67
IL22	-1.01	-0.33	-0.67
GHR	-0.18	-1.18	-0.68
LECT2	-1.06	-0.3	-0.68
LEPR	-1.12	-0.24	-0.68
FGF7	-0.41	-0.98	-0.69
IL21R	-1.17	-0.22	-0.69
DNAJB1	-0.6	-0.81	-0.71
HSPA1A	-0.85	-0.57	-0.71
FER	-1.39	-0.04	-0.72
IL36G	-0.02	-1.43	-0.72
LEFTY2	-1.21	-0.25	-0.73
FCGR2B	-0.81	-0.7	-0.76
GSN	-1.16	-0.36	-0.76
LBP	-1.12	-0.43	-0.77
IL1B	-0.11	-1.44	-0.78
HSPD1	-0.75	-0.84	-0.79
POMC	-1.35	-0.24	-0.79
FGF8	-0.37	-1.24	-0.8
CSF3R	-0.39	-1.24	-0.82
IL36B	-0.02	-1.61	-0.82
CCL19	-1.47	-0.17	-0.82
SERPIND1	-1.37	-0.28	-0.82
HBEGF	-0.32	-1.35	-0.84
KLF4	-1.63	-0.08	-0.86
GDF11	-0.13	-1.62	-0.88
IL36RN	-0.05	-1.72	-0.88
FGF9	-0.29	-1.49	-0.89
CCL16	-0.26	-1.53	-0.9
GDF1	-0.34	-1.48	-0.91
FGF10	-0.29	-1.57	-0.93
SERTAD2	-1.77	-0.1	-0.93
FGF11	-0.21	-1.67	-0.94
SERPINI1	-1.69	-0.19	-0.94
FGF13	-0.27	-1.62	-0.95
GATA4	-1.05	-0.84	-0.95
IL37	-0.17	-1.75	-0.96
FEN1	-1.19	-0.77	-0.98
FGF12	-0.22	-1.73	-0.98
HGF	-0.35	-1.61	-0.98
RECK	-1.74	-0.21	-0.98
IL36A	-0.22	-1.79	-1.01
GDF3	-0.48	-1.59	-1.03
CCHCR1	-0.43	-1.63	-1.03
Omentin	-1.83	-0.33	-1.08
GDF9	-0.42	-1.78	-1.1
NRG1	-0.53	-1.66	-1.1
SLC12A6	-1.26	-0.96	-1.11
MSTN	-0.54	-1.73	-1.13
FGL1	-0.6	-1.66	-1.13
KIF3B	-1.56	-0.73	-1.15
RELM alpha	-1.89	-0.43	-1.16
CSTB	-0.75	-1.61	-1.18
KCTD10	-1.36	-1.03	-1.19
MICB	-2.39	-0.02	-1.21
PON1	-2.03	-0.41	-1.22
RIPK1	-2.24	-0.26	-1.25
RETN	-2.05	-0.53	-1.29
MSLN	-2.37	-0.23	-1.3
POU5F1	-2.24	-0.46	-1.35
RET	-2.3	-0.41	-1.36
PON2	-2.38	-0.62	-1.5
PPP2R5C	-2.65	-0.34	-1.5
PPARG	-2.48	-0.57	-1.52

## Sheet: S1F.Microvesicle_SmallRNA
Ensembl_Gene_ID	HGNC_Symbol	Log2_Fold_Change_HCT116	Log2_Fold_Change_MCF7	Log2_Fold_Change_Average
ENSG00000199038	MIR210	1.93104	4.13813	3.03458
ENSG00000266297	MIR744	3.02216	3.03818	3.03017
ENSG00000199023	MIR339	0.630395	4.86594	2.74817
ENSG00000207550	MIR99B	3.38445	2.05428	2.71936
ENSG00000208037	MIR320A	4.21405	1.12901	2.67153
ENSG00000271748	MIR92B	3.14051	1.6904	2.41545
ENSG00000269900	RMRP	1.61104	3.1033	2.35717
ENSG00000199631	SNORD33	4.12031	0.256266	2.18829
ENSG00000198973	MIR375	2.73056	1.33676	2.03366
ENSG00000207757	MIR93	3.92356	0.0506119	1.98709
ENSG00000198984	MIR345	1.8699	2.06938	1.96964
ENSG00000199053	MIR324	1.75753	2.05868	1.9081
ENSG00000251898	SCARNA11	2.4931	1.29882	1.89596
ENSG00000207971	MIR125B1	3.42318	0.316449	1.86981
ENSG00000221500	SNORD100	3.37942	0.296391	1.8379
ENSG00000270022	RNU12	3.38445	0.205647	1.79505
ENSG00000199753	SNORD104	0.724872	2.71921	1.72204
ENSG00000199347	RNU5E-1	2.57034	0.844216	1.70728
ENSG00000222650	RNU2-70P	2.65419	0.741312	1.69775
ENSG00000202347	RNU1-16P	2.48299	0.852445	1.66772
ENSG00000200534	SNORA33	1.71688	1.52117	1.61902
ENSG00000221445	MIR1301	1.06762	2.16404	1.61583
ENSG00000199071	MIR423	2.61938	0.553217	1.5863
ENSG00000221039	MIR1286	1.75753	1.39399	1.57576
ENSG00000200087	SNORA73B	2.58524	0.486962	1.5361
ENSG00000221539	SNORD99	2.3989	0.631309	1.5151
ENSG00000199177	MIR31	2.05164	0.959063	1.50535
ENSG00000221063	MIR1296	1.93104	1.07771	1.50438
ENSG00000207709	MIR197	2.95831	0.0443663	1.50134
ENSG00000200795	RNU4-1	1.36487	1.61845	1.49166
ENSG00000199568	RNU5A-1	2.10167	0.808032	1.45485
ENSG00000207175	RNU1-67P	2.05992	0.757946	1.40893
ENSG00000265596	MIR3659	2.22574	0.576058	1.4009
ENSG00000222355	RNU2-29P	2.13427	0.654892	1.39458
ENSG00000207608	MIR127	1.90302	0.823737	1.36338
ENSG00000199377	RNU5F-1	1.69877	1.0047	1.35174
ENSG00000208013	MIR652	1.48078	1.21834	1.34956
ENSG00000206622	SNORA69	1.79345	0.774493	1.28397
ENSG00000206775	SNORD37	1.85922	0.661978	1.2606
ENSG00000211517	MIR671	0.630395	1.87702	1.25371
ENSG00000188825	LINC00910	1.71688	0.789068	1.25297
ENSG00000264661	MIR3200	1.05494	1.44469	1.24981
ENSG00000264603	MIR3159	2.10028	0.334029	1.21716
ENSG00000200156	RNU5B-1	1.22311	1.20893	1.21602
ENSG00000200785	SNORD8	1.06762	1.34725	1.20744
ENSG00000272296	SNORD96A	2.07647	0.327716	1.20209
ENSG00000206885	SNORA75	1.67444	0.728187	1.20131
ENSG00000207776	MIR551A	2.35322	0.0370859	1.19515
ENSG00000208017	MIR140	1.95275	0.420043	1.1864
ENSG00000238942	SNORD2	1.6056	0.725451	1.16553
ENSG00000264141	MIR3928	1.4027	0.914939	1.15882
ENSG00000206917	RNU1-52P	0.724872	1.5915	1.15819
ENSG00000252635	RNU2-56P	1.55905	0.730471	1.14476
ENSG00000263764	SNORD43	1.50855	0.769283	1.13892
ENSG00000209480	SNORD83B	1.9777	0.273753	1.12573
ENSG00000202198	RN7SK	0.630395	1.57369	1.10204
ENSG00000202444	RNU5E-6P	1.69943	0.498478	1.09896
ENSG00000264425	MIR4653	1.28351	0.910236	1.09687
ENSG00000200394	SNORA38B	0.724872	1.45348	1.08918
ENSG00000207944	MIR574	0.630395	1.53521	1.0828
ENSG00000207639	MIR193B	0.0108913	2.13997	1.07543
ENSG00000200169	RNU5D-1	1.85124	0.297849	1.07454
ENSG00000199293	SNORA21	0.630395	1.49895	1.06467
ENSG00000215998	MIR935	0.630395	1.47881	1.0546
ENSG00000201302	SNORA65	1.06762	1.02332	1.04547
ENSG00000201098	RNY1	1.63083	0.440543	1.03568
ENSG00000202538	RNU4-2	0.367535	1.6977	1.03262
ENSG00000201910	RNU1-140P	1.71355	0.326396	1.01997
ENSG00000200972	RNU5A-8P	1.37233	0.627628	0.999978
ENSG00000266320	MIR3909	1.4027	0.584419	0.993562
ENSG00000200211	RNY4P27	1.27739	0.664774	0.971085
ENSG00000259001	RPPH1	0.896375	1.03651	0.966443
ENSG00000252808	SCARNA4	1.75753	0.145895	0.951713
ENSG00000200296	RNU1-83P	0.87324	1.02372	0.948481
ENSG00000264229	RNU4ATAC	1.65429	0.230271	0.942279
ENSG00000212456	RNVU1-13	0.519498	1.31479	0.917146
ENSG00000200510	RNY4P2	0.351197	1.48211	0.916655
ENSG00000206838	SNORA5A	0.630395	1.18925	0.909823
ENSG00000200084	SNORD68	0.750194	1.0577	0.903945
ENSG00000207728	MIR449B	0.921471	0.879996	0.900733
ENSG00000222426	RNU2-50P	1.50466	0.272389	0.888527
ENSG00000221366	MIR1306	0.630395	1.12225	0.876324
ENSG00000207773	MIR642A	1.48753	0.241248	0.864391
ENSG00000206680	SNORD21	0.551089	1.17182	0.861453
ENSG00000222536	RNU2-39P	1.47924	0.239042	0.859142
ENSG00000212158	SNORD66	1.33169	0.368589	0.850139
ENSG00000212588	SNORA26	0.491908	1.19278	0.842344
ENSG00000233016	SNHG7	1.06762	0.582988	0.825306
ENSG00000263790	MIR4473	0.447398	1.19558	0.821488
ENSG00000252695	MIR2276	0.630395	1.00828	0.819336
ENSG00000207875	MIRLET7B	1.58422	0.0488882	0.816555
ENSG00000202363	SNORA62	1.4027	0.230271	0.816487
ENSG00000249784	SCARNA22	1.05995	0.570809	0.815381
ENSG00000207656	MIR489	1.56027	0.0599445	0.810105
ENSG00000207778	MIR122	1.57987	0.00953385	0.794702
ENSG00000221052	MIR1266	1.06762	0.490398	0.779011
ENSG00000200983	SNORA3	1.4027	0.146394	0.774549
ENSG00000223336	RNU2-6P	1.36893	0.178526	0.773727
ENSG00000200408	RNA5SP74	1.06762	0.462666	0.765145
ENSG00000207701	MIR597	1.4027	0.123451	0.763078
ENSG00000263776	SNORA4	0.7832	0.730761	0.756981
ENSG00000206799	SNORA32	0.856653	0.625525	0.741089
ENSG00000201675	SNORD32A	0.630395	0.847856	0.739125
ENSG00000222076	RNU2-3P	1.28681	0.189297	0.738054
ENSG00000222414	RNU2-59P	0.964397	0.504254	0.734325
ENSG00000212464	SNORA12	1.4027	0.0647118	0.733708
ENSG00000202515	VTRNA1-3	1.4027	0.0370859	0.719895
ENSG00000251733	SCARNA8	1.14178	0.297131	0.719455
ENSG00000199094	MIR30C2	0.630395	0.799209	0.714802
ENSG00000221464	MIR1271	0.630395	0.794084	0.71224
ENSG00000197989	SNHG12	0.026853	1.36159	0.694222
ENSG00000201457	SNORA55	1.06762	0.310711	0.689167
ENSG00000207445	SNORD15B	1.33169	0.035175	0.683432
ENSG00000212452	SNORD69	0.134853	1.23131	0.683081
ENSG00000207406	SNORA41	0.890272	0.471035	0.680654
ENSG00000201470	RNY4P7	0.287643	1.06983	0.678738
ENSG00000252316	RNY4	0.890272	0.465443	0.677857
ENSG00000263593	MIR4804	1.06762	0.28669	0.677157
ENSG00000207392	SNORA20	1.05995	0.28669	0.673321
ENSG00000207047	SNORD51	1.05494	0.28669	0.670813
ENSG00000207405	SNORA64	0.0161167	1.31889	0.667504
ENSG00000222985	RNU2-14P	1.04675	0.28669	0.666719
ENSG00000199047	MIR378A	1.06762	0.258467	0.663045
ENSG00000207951	MIR561	0.117598	1.20406	0.66083
ENSG00000264941	MIR4474	0.630395	0.690299	0.660347
ENSG00000264294	SNORD55	0.0161167	1.29196	0.65404
ENSG00000207935	MIR204	1.22228	0.0754566	0.64887
ENSG00000201801	RNU5E-4P	0.688109	0.608758	0.648434
ENSG00000238363	SNORA13	0.822825	0.460693	0.641759
ENSG00000206630	SNORD60	0.501479	0.777578	0.639529
ENSG00000180764	PIPSL	1.06762	0.204429	0.636026
ENSG00000212443	SNORA53	0.0161167	1.24201	0.629065
ENSG00000212232	SNORD17	0.597045	0.659331	0.628188
ENSG00000265932	MIR3146	0.724872	0.525745	0.625308
ENSG00000201185	RNA5SP202	1.06762	0.174431	0.621027
ENSG00000223125	RNU2-32P	0.96967	0.242485	0.606078
ENSG00000264725	MIR3129	0.219897	0.991543	0.60572
ENSG00000200197	RNU1-21P	0.44812	0.735008	0.591564
ENSG00000223001	RNU2-61P	0.149768	1.02765	0.588711
ENSG00000199031	MIR371A	0.630395	0.525745	0.57807
ENSG00000229686	SNORD56	0.630395	0.525745	0.57807
ENSG00000264919	MIR4697	0.630395	0.525745	0.57807
ENSG00000252487	RNY4P20	0.446698	0.708681	0.577689
ENSG00000197258	EIF4BP6	0.216008	0.923863	0.569936
ENSG00000263894	MIR3925	0.630395	0.508783	0.569589
ENSG00000209645	SNORD105	1.06762	0.0647118	0.566168
ENSG00000252712	SCARNA14	1.06762	0.0647118	0.566168
ENSG00000199900	RNA5SP463	1.06762	0.0507681	0.559196
ENSG00000200885	RNU1-146P	0.630395	0.485838	0.558117
ENSG00000232573	RPL3P4	0.7832	0.326241	0.55472
ENSG00000207617	MIR3074	0.630395	0.477716	0.554056
ENSG00000213003	BTF3P12	0.630395	0.477716	0.554056
ENSG00000188070	C11orf95	0.7832	0.28669	0.534945
ENSG00000267532	MIR497HG	1.00554	0.0633263	0.534435
ENSG00000226666	HSPA9P1	0.216008	0.838802	0.527405
ENSG00000207304	SNORA8	0.724872	0.28669	0.505781
ENSG00000206941	SNORD15A	0.890272	0.0983221	0.494297
ENSG00000207647	MIR153-1	0.630395	0.326241	0.478318
ENSG00000221763	MIR1289-1	0.630395	0.316449	0.473422
ENSG00000230629	RPS23P8	0.630395	0.316449	0.473422
ENSG00000206989	SNORD63	0.44812	0.495924	0.472022
ENSG00000238344	SNORD126	0.287643	0.655521	0.471582
ENSG00000207584	MIR196B	0.792653	0.144058	0.468355
ENSG00000207621	MIR224	0.859373	0.0754566	0.467415
ENSG00000263742	MIR3165	0.630395	0.28669	0.458543
ENSG00000202031	SNORD38A	0.398703	0.504816	0.45176
ENSG00000200320	SNORA63	0.672139	0.231164	0.451652
ENSG00000199066	MIR330	0.0108913	0.877944	0.444418
ENSG00000264395	MIR3193	0.724872	0.146766	0.435819
ENSG00000202314	SNORD6	0.430759	0.429434	0.430096
ENSG00000198972	MIRLET7E	0.291715	0.517491	0.404603
ENSG00000207088	SNORA7B	0.630395	0.146766	0.388581
ENSG00000238835	SCARNA18	0.630395	0.146766	0.388581
ENSG00000266756	MIR5680	0.630395	0.143805	0.3871
ENSG00000207625	MIR128-2	0.630395	0.142533	0.386464
ENSG00000199805	RNU1-134P	0.287643	0.475181	0.381412
ENSG00000207988	MIR576	0.441427	0.320194	0.38081
ENSG00000266144	MIR4654	0.630395	0.123451	0.376923
ENSG00000200997	RNU1-85P	0.630395	0.111432	0.370914
ENSG00000207769	MIR586	0.630395	0.111432	0.370914
ENSG00000207927	MIR302A	0.44812	0.28669	0.367405
ENSG00000265520	MIR548V	0.44812	0.28669	0.367405
ENSG00000251856	MIR449C	0.630395	0.0913141	0.360855
ENSG00000207421	SNORD38B	0.657377	0.0622521	0.359815
ENSG00000201487	SNORD45B	0.630395	0.0712846	0.35084
ENSG00000199620	RNA5SP258	0.630395	0.0647118	0.347554
ENSG00000228224	NACAP1	0.630395	0.0647118	0.347554
ENSG00000264089	MIR3681	0.630395	0.0647118	0.347554
ENSG00000207646	MIR655	0.134853	0.525745	0.330299
ENSG00000211583	MIR767	0.630395	0.00875401	0.319575
ENSG00000199135	MIR101-1	0.588779	0.0112277	0.300004
ENSG00000264882	MIR376A1	0.287643	0.303767	0.295705
ENSG00000198986	MIRLET7A3	0.121305	0.465443	0.293374
ENSG00000207781	MIR625	0.287643	0.28669	0.287167
ENSG00000245532	NEAT1	0.551089	0.0104101	0.280749
ENSG00000215938	MIR190B	0.371974	0.172204	0.272089
ENSG00000265725	MIR3144	0.287643	0.254421	0.271032
ENSG00000207863	MIR125B2	0.287643	0.242346	0.264994
ENSG00000264994	SNORD92	0.44812	0.0712846	0.259702
ENSG00000271946	MIR376C	0.134853	0.368589	0.251721
ENSG00000216058	MIR944	0.181558	0.298241	0.239899
ENSG00000206602	SNORD58A	0.349427	0.112784	0.231105
ENSG00000210741	MIR196A1	0.423345	0.0155411	0.219443
ENSG00000207635	MIR499A	0.126373	0.311967	0.21917
ENSG00000270066	SCARNA2	0.0161167	0.409185	0.212651
ENSG00000207698	MIR32	0.128839	0.294593	0.211716
ENSG00000207729	MIR556	0.307798	0.112266	0.210032
ENSG00000207692	MIR592	0.0617395	0.266015	0.163877
ENSG00000269936	MIR145	0.159208	0.03175	0.0954789
ENSG00000265201	MIR4677	0.149659	0.03175	0.0907044
ENSG00000199004	MIR21	0.0619757	0.114679	0.0883275
ENSG00000266104	MIR4326	0.0161167	0.105699	0.060908
ENSG00000208003	MIR549	0.0212031	0.0647118	0.0429575
ENSG00000199161	MIR126	-0.044774	-0.0648217	-0.0547979
ENSG00000202569	MIR146B	-0.0797728	-0.140934	-0.110353
ENSG00000207744	MIR10B	-0.134305	-0.122313	-0.128309
ENSG00000212102	MIR301B	-0.0732882	-0.230571	-0.151929
ENSG00000207990	MIR182	-0.297345	-0.0340989	-0.165722
ENSG00000222293	RNU2-36P	-0.342752	-0.0050435	-0.173898
ENSG00000207628	MIR651	-0.0706663	-0.297305	-0.183986
ENSG00000265435	MIR3121	-0.101319	-0.270942	-0.18613
ENSG00000264249	MIR3912	-0.352502	-0.0197692	-0.186136
ENSG00000207691	MIR183	-0.282215	-0.149109	-0.215662
ENSG00000207712	MIR627	-0.161026	-0.293346	-0.227186
ENSG00000207702	MIR211	-0.342752	-0.127622	-0.235187
ENSG00000199065	MIR101-2	-0.268391	-0.208754	-0.238573
ENSG00000232956	SNHG15	-0.368573	-0.127622	-0.248098
ENSG00000212027	MIR374B	-0.479242	-0.0264762	-0.252859
ENSG00000259758	CASC7	-0.0546435	-0.456437	-0.25554
ENSG00000263572	MIR5683	-0.173589	-0.341953	-0.257771
ENSG00000221630	MIR1179	-0.17357	-0.347405	-0.260488
ENSG00000202400	SNORD82	-0.315675	-0.21051	-0.263093
ENSG00000207600	MIR598	-0.342752	-0.187901	-0.265327
ENSG00000221227	MIR1305	-0.342752	-0.196044	-0.269398
ENSG00000265442	MIR3941	-0.421112	-0.127622	-0.274367
ENSG00000199132	MIR450A1	-0.342752	-0.221978	-0.282365
ENSG00000207812	MIR19B2	-0.342752	-0.221978	-0.282365
ENSG00000221548	MIR1283-2	-0.342752	-0.221978	-0.282365
ENSG00000250526	CCT6P2	-0.342752	-0.221978	-0.282365
ENSG00000263987	MIR5698	-0.342752	-0.221978	-0.282365
ENSG00000207784	MIR542	-0.258972	-0.31941	-0.289191
ENSG00000198987	MIR16-2	-0.141312	-0.48363	-0.312471
ENSG00000211514	MIR454	-0.403329	-0.23449	-0.31891
ENSG00000198995	MIR340	-0.573538	-0.0673869	-0.320462
ENSG00000264354	MIR3134	-0.421112	-0.221978	-0.321545
ENSG00000266852	MIR4482-1	-0.389139	-0.267788	-0.328463
ENSG00000249353	NPM1P27	-0.619504	-0.0405831	-0.330044
ENSG00000208317	SNORD78	-0.449214	-0.213007	-0.331111
ENSG00000222365	SNORD12B	-0.639766	-0.044081	-0.341924
ENSG00000207609	MIR491	-0.342752	-0.347405	-0.345079
ENSG00000207568	MIR203	-0.0464755	-0.648329	-0.347402
ENSG00000272533	SNORA28	-0.342752	-0.390749	-0.36675
ENSG00000264377	MIR4671	-0.0316139	-0.712502	-0.372058
ENSG00000202012	RNY4P15	-0.342752	-0.414312	-0.378532
ENSG00000237676	RPL30P4	-0.342752	-0.414312	-0.378532
ENSG00000239039	SNORD13	-0.342752	-0.414312	-0.378532
ENSG00000264802	MIR5191	-0.342752	-0.414312	-0.378532
ENSG00000208014	MIR653	-0.402146	-0.364903	-0.383524
ENSG00000264712	MIR4504	-0.662963	-0.106666	-0.384814
ENSG00000207807	MIR95	-0.0200007	-0.755316	-0.387658
ENSG00000207581	MIR199B	-0.0710751	-0.717707	-0.394391
ENSG00000236552	RPL13AP5	-0.342752	-0.449115	-0.395934
ENSG00000207730	MIR200B	-0.19556	-0.60256	-0.39906
ENSG00000207996	MIR301A	-0.490917	-0.323963	-0.40744
ENSG00000207789	MIR26A2	-0.368573	-0.449115	-0.408844
ENSG00000263857	MIR4729	-0.596648	-0.221978	-0.409313
ENSG00000207493	SNORA46	-0.346255	-0.48208	-0.414167
ENSG00000202609	MIR488	-0.342752	-0.489973	-0.416362
ENSG00000215032	GNL3LP1	-0.619504	-0.221978	-0.420741
ENSG00000225053	PRPF38AP1	-0.342752	-0.503724	-0.423238
ENSG00000199092	MIR410	-0.281928	-0.570045	-0.425986
ENSG00000207942	MIR136	-0.00425557	-0.884884	-0.44457
ENSG00000198976	MIR429	-0.436004	-0.465778	-0.450891
ENSG00000249909	CYCTP	-0.851615	-0.0582507	-0.454933
ENSG00000221808	MIR1256	-0.619504	-0.297305	-0.458405
ENSG00000242086	LINC00969	-0.342752	-0.583995	-0.463374
ENSG00000253008	MIR2355	-0.315512	-0.61715	-0.466331
ENSG00000201403	SNORD14B	-0.342752	-0.590386	-0.466569
ENSG00000265206	MIR142	-0.472623	-0.471616	-0.472119
ENSG00000264357	MIR4648	-0.619504	-0.34339	-0.481447
ENSG00000264614	MIR5588	-0.619504	-0.34339	-0.481447
ENSG00000207959	MIR656	-0.22122	-0.769861	-0.495541
ENSG00000255083	OR5AK1P	-0.342752	-0.694989	-0.518871
ENSG00000221594	MIR548F1	-0.799596	-0.243215	-0.521405
ENSG00000200879	SNORD14E	-0.523335	-0.555098	-0.539216
ENSG00000199025	MIR369	-0.849299	-0.250933	-0.550116
ENSG00000222328	RNU2-2P	-1.02905	-0.0714066	-0.550227
ENSG00000221203	MIR1262	-0.831262	-0.324604	-0.577933
ENSG00000265057	MIR4765	-1.05151	-0.127622	-0.589565
ENSG00000252010	SCARNA5	-0.596648	-0.592269	-0.594458
ENSG00000207743	MIR495	-0.205945	-0.986854	-0.596399
ENSG00000088340	FER1L4	-0.619504	-0.583995	-0.60175
ENSG00000236698	EIF1AXP1	-0.619504	-0.583995	-0.60175
ENSG00000265396	MIR3128	-0.951513	-0.267788	-0.60965
ENSG00000222370	SNORA36B	-0.639766	-0.592696	-0.616231
ENSG00000177410	ZFAS1	-1.05151	-0.195016	-0.623261
ENSG00000266417	MIR4424	-0.604114	-0.667307	-0.635711
ENSG00000264764	MIR4772	-0.342752	-0.998549	-0.670651
ENSG00000263540	MIR5582	-0.762807	-0.583995	-0.673401
ENSG00000263793	MIR3115	-0.619504	-0.735805	-0.677654
ENSG00000251562	MALAT1	-1.11885	-0.237408	-0.678129
ENSG00000207590	MIR215	-0.891439	-0.515946	-0.703692
ENSG00000221745	MIR1197	-0.342752	-1.11391	-0.728333
ENSG00000199477	SNORA31	-1.22704	-0.237182	-0.732113
ENSG00000266555	MIR3145	-1.03105	-0.447458	-0.739254
ENSG00000212296	SNORD72	-0.619504	-0.87315	-0.746327
ENSG00000266423	MIR3163	-1.35142	-0.1509	-0.751162
ENSG00000202560	MIR539	-0.942481	-0.58646	-0.764471
ENSG00000199109	MIR411	-0.986468	-0.543865	-0.765167
ENSG00000272034	SNORD14A	-0.421112	-1.12752	-0.774318
ENSG00000207696	MIR659	-0.342752	-1.36048	-0.851616
ENSG00000265213	MIR3684	-1.09789	-0.806725	-0.952306
ENSG00000216001	MIR450B	-1.82143	-0.141151	-0.98129
ENSG00000266228	MIR3611	-1.58582	-0.490325	-1.03807
ENSG00000221265	MIR1255A	-1.28152	-0.843166	-1.06234
ENSG00000207756	MIR580	-1.88039	-0.297305	-1.08885
ENSG00000266594	MIR4766	-0.571795	-1.69437	-1.13308
ENSG00000206142	FAM230C	-1.22704	-1.07452	-1.15078
ENSG00000264864	MIR3613	-2.21117	-0.376637	-1.2939

## Sheet: S1G.Cell_SmallRNA
Ensembl_Gene_ID	HGNC_Symbol	Log2_Fold_Change_HCT116	Log2_Fold_Change_MCF7	Log2_Fold_Change_Average
ENSG00000221066	SNORD111	1.82747	1.43732	1.63239
ENSG00000207280	SNORD20	2.51239	0.743502	1.62795
ENSG00000212447	SNORD90	2.09559	0.824349	1.45997
ENSG00000239043	SNORD127	1.4759	0.846292	1.1611
ENSG00000206620	SNORD45C	1.25826	0.777524	1.01789
ENSG00000238862	SNORD19B	0.463533	1.24338	0.853456
ENSG00000207241	SNORD45A	0.945038	0.577008	0.761023
ENSG00000207031	SNORD59A	1.47734	0.0183175	0.747829
ENSG00000251806	SNORD119	0.669268	0.789622	0.729445
ENSG00000222365	SNORD12B	0.507022	0.890926	0.698974
ENSG00000209042	SNORD12C	1.07887	0.28766	0.683267
ENSG00000202400	SNORD82	0.996864	0.343002	0.669933
ENSG00000239195	SNORD5	0.547986	0.717522	0.632754
ENSG00000202093	SNORD58C	0.450224	0.726422	0.588323
ENSG00000221514	SNORD111B	0.430428	0.723316	0.576872
ENSG00000201264		0.213319	0.786487	0.499903
ENSG00000212534	SNORD70	0.473646	0.315642	0.394644
ENSG00000238886	SNORD121A	0.399612	0.221565	0.310588
ENSG00000199574	SNORD18C	0.363146	0.105252	0.234199
ENSG00000214027	ARPC3P5	0.428283	0.0152632	0.221773
ENSG00000257026		0.29242	0.0769662	0.184693
ENSG00000202529	SNORD18B	0.281644	0.0515108	0.166577
ENSG00000215105	TTC3P1	0.09696	0.0963804	0.0966702
ENSG00000236058		0.104836	0.0766616	0.0907488
ENSG00000265827	MIR4680	0.0387753	0.115413	0.0770941
ENSG00000214185	XPOTP1	0.149662	0.00240738	0.0760345
ENSG00000207410		0.0862443	0.0232849	0.0547646
ENSG00000214192	UBE2V1P2	0.0509056	0.0497545	0.05033
ENSG00000208317	SNORD78	0.0934702	0.00492009	0.0491952
ENSG00000214174	AMZ2P1	0.0694461	0.0265466	0.0479964
ENSG00000235609		0.0790015	0.00559197	0.0422968
ENSG00000218283	MORF4L1P1	0.062135	0.0214236	0.0417793
ENSG00000199934		0.0287795	0.0520021	0.0403908
ENSG00000251904	RNA5SP272	0.0069975	0.073462	0.0402297
ENSG00000207422	RNU6-813P	0.0564547	0.0232849	0.0398698
ENSG00000215559	ANKRD20A11P	0.0564547	0.0232849	0.0398698
ENSG00000230490		0.0564547	0.0232849	0.0398698
ENSG00000273373		0.0283587	0.0497545	0.0390566
ENSG00000254449	SF3A3P2	0.0509056	0.0264695	0.0386876
ENSG00000254343		0.0513264	0.0232849	0.0373056
ENSG00000255909		0.0468993	0.0264695	0.0366844
ENSG00000228223	HCG11	0.0513264	0.00240738	0.0268669
ENSG00000212587		0.0287795	0.0232849	0.0260322
ENSG00000228283	KATNBL1P6	0.0287795	0.0232849	0.0260322
ENSG00000214696		0.0438495	0.00559197	0.0247207
ENSG00000229344		0.0225469	0.0264695	0.0245082
ENSG00000238818		0.0225469	0.0264695	0.0245082
ENSG00000250202		0.0225469	0.0264695	0.0245082
ENSG00000201950	SNORD113-9	0.0232304	0.0232849	0.0232577
ENSG00000207263	SNORD116-16	0.0225469	0.0232849	0.0229159
ENSG00000230487	PSMG3-AS1	0.0220809	0.0232849	0.0226829
ENSG00000180747		0.0375346	0.00240738	0.019971
ENSG00000213194		0.0287795	0.00559197	0.0171857
ENSG00000233954		0.000683529	0.0264695	0.0135765
ENSG00000205105	COX17P1	0.000683529	0.0232849	0.0119842
ENSG00000268543		0.000683529	0.0214236	0.0110536
ENSG00000238426		0.000508002	0.019176	0.009842
ENSG00000223891	OSER1-AS1	-0.00736522	-0.00410894	-0.00573708
ENSG00000226342	NMD3P1	-0.00113261	-0.0208776	-0.0110051
ENSG00000234494		-0.00113261	-0.0208776	-0.0110051
ENSG00000180673	EXOC5P1	-0.00220221	-0.0208776	-0.0115399
ENSG00000207248	RNU6-1005P	-0.00554908	-0.0208776	-0.0132133
ENSG00000101898		-0.00668169	-0.0208776	-0.0137796
ENSG00000246263		-0.00736522	-0.0208776	-0.0141214
ENSG00000270959	LPP-AS2	-0.00736522	-0.0208776	-0.0141214
ENSG00000260318	COX6CP1	-0.00113261	-0.0305785	-0.0158555
ENSG00000177820		-0.028096	-0.00410894	-0.0161024
ENSG00000263468	MIR3130-2	-0.028096	-0.00410894	-0.0161024
ENSG00000263468	MIR3130-1	-0.028096	-0.00410894	-0.0161024
ENSG00000272994		-0.028096	-0.00410894	-0.0161024
ENSG00000207729	MIR556	-0.028096	-0.00550381	-0.0167999
ENSG00000264021	MIR3917	-0.0299121	-0.00410894	-0.0170105
ENSG00000224699	LAMTOR5-AS1	-0.028096	-0.00729353	-0.0176947
ENSG00000265871	MIR3174	-0.028096	-0.00729353	-0.0176947
ENSG00000227347	HNRNPKP2	-0.00554908	-0.0305785	-0.0180638
ENSG00000246982		-0.0299121	-0.00729353	-0.0186028
ENSG00000170468		-0.00113261	-0.0366283	-0.0188805
ENSG00000234072		-0.0142227	-0.0305785	-0.0224006
ENSG00000177855	CACYBPP2	-0.028096	-0.0208776	-0.0244868
ENSG00000223203	RNA5SP221	-0.028096	-0.0208776	-0.0244868
ENSG00000236824	BCYRN1	-0.028096	-0.0208776	-0.0244868
ENSG00000240342	RPS2P5	-0.028096	-0.0208776	-0.0244868
ENSG00000248880	NARG2P1	-0.028096	-0.0208776	-0.0244868
ENSG00000266459	MIR4724	-0.028096	-0.0208776	-0.0244868
ENSG00000201532	RNA5SP194	-0.0299121	-0.0208776	-0.0253948
ENSG00000207650	MIR570	-0.0299121	-0.0208776	-0.0253948
ENSG00000225218		-0.0299121	-0.0208776	-0.0253948
ENSG00000235381		-0.0299121	-0.0208776	-0.0253948
ENSG00000261351		-0.0299121	-0.0208776	-0.0253948
ENSG00000266680		-0.0299121	-0.0249865	-0.0274493
ENSG00000224837	GCSHP5	-0.026359	-0.0305785	-0.0284687
ENSG00000163612	FAM86KP	-0.028096	-0.0305785	-0.0293372
ENSG00000173295	FAM86B3P	-0.028096	-0.0305785	-0.0293372
ENSG00000179342		-0.028096	-0.0305785	-0.0293372
ENSG00000186056	MATN1-AS1	-0.028096	-0.0305785	-0.0293372
ENSG00000199805	RNU1-134P	-0.028096	-0.0305785	-0.0293372
ENSG00000207375	SNORD116-23	-0.028096	-0.0305785	-0.0293372
ENSG00000214796		-0.028096	-0.0305785	-0.0293372
ENSG00000223109	MIR1538	-0.028096	-0.0305785	-0.0293372
ENSG00000231434		-0.028096	-0.0305785	-0.0293372
ENSG00000232098		-0.028096	-0.0305785	-0.0293372
ENSG00000236778	INTS6-AS1	-0.028096	-0.0305785	-0.0293372
ENSG00000241889		-0.028096	-0.0305785	-0.0293372
ENSG00000245534		-0.028096	-0.0305785	-0.0293372
ENSG00000249042		-0.028096	-0.0305785	-0.0293372
ENSG00000251441	RTEL1P1	-0.028096	-0.0305785	-0.0293372
ENSG00000254682		-0.028096	-0.0305785	-0.0293372
ENSG00000255153	TOLLIP-AS1	-0.028096	-0.0305785	-0.0293372
ENSG00000257086		-0.028096	-0.0305785	-0.0293372
ENSG00000260475		-0.028096	-0.0305785	-0.0293372
ENSG00000263327	TAPT1-AS1	-0.028096	-0.0305785	-0.0293372
ENSG00000264219	MIR4442	-0.028096	-0.0305785	-0.0293372
ENSG00000264448	MIR378D2	-0.028096	-0.0305785	-0.0293372
ENSG00000265452	MIR3682	-0.028096	-0.0305785	-0.0293372
ENSG00000265750		-0.028096	-0.0305785	-0.0293372
ENSG00000266619	MIR4642	-0.028096	-0.0305785	-0.0293372
ENSG00000266632	MIR4726	-0.028096	-0.0305785	-0.0293372
ENSG00000272672		-0.028096	-0.0305785	-0.0293372
ENSG00000272906		-0.028096	-0.0305785	-0.0293372
ENSG00000266820		-0.0292286	-0.0305785	-0.0299035
ENSG00000197813		-0.0299121	-0.0305785	-0.0302453
ENSG00000201938		-0.0299121	-0.0305785	-0.0302453
ENSG00000207142		-0.0299121	-0.0305785	-0.0302453
ENSG00000207474	RNY1P7	-0.0299121	-0.0305785	-0.0302453
ENSG00000213434	VTI1BP2	-0.0299121	-0.0305785	-0.0302453
ENSG00000216105	MIR943	-0.0299121	-0.0305785	-0.0302453
ENSG00000220875	HIST1H3PS1	-0.0299121	-0.0305785	-0.0302453
ENSG00000227014		-0.0299121	-0.0305785	-0.0302453
ENSG00000231365		-0.0299121	-0.0305785	-0.0302453
ENSG00000234807	LINC01135	-0.0299121	-0.0305785	-0.0302453
ENSG00000236942		-0.0299121	-0.0305785	-0.0302453
ENSG00000239705		-0.0299121	-0.0305785	-0.0302453
ENSG00000239776		-0.0299121	-0.0305785	-0.0302453
ENSG00000244139	RN7SL397P	-0.0299121	-0.0305785	-0.0302453
ENSG00000244300		-0.0299121	-0.0305785	-0.0302453
ENSG00000247570	SDCBPP2	-0.0299121	-0.0305785	-0.0302453
ENSG00000249850	KRT18P31	-0.0299121	-0.0305785	-0.0302453
ENSG00000250988		-0.0299121	-0.0305785	-0.0302453
ENSG00000253669		-0.0299121	-0.0305785	-0.0302453
ENSG00000254454	RCC2P6	-0.0299121	-0.0305785	-0.0302453
ENSG00000255200		-0.0299121	-0.0305785	-0.0302453
ENSG00000255559	ZNF252P-AS1	-0.0299121	-0.0305785	-0.0302453
ENSG00000259083		-0.0299121	-0.0305785	-0.0302453
ENSG00000261705		-0.0299121	-0.0305785	-0.0302453
ENSG00000262074	SNORD3B-2	-0.0299121	-0.0305785	-0.0302453
ENSG00000266420	RN7SL118P	-0.0299121	-0.0305785	-0.0302453
ENSG00000266737	MIR4691	-0.0299121	-0.0305785	-0.0302453
ENSG00000267104	TBC1D3P1-DHX40P1	-0.0299121	-0.0305785	-0.0302453
ENSG00000269386	RAB11B-AS1	-0.0299121	-0.0305785	-0.0302453
ENSG00000273486		-0.0299121	-0.0305785	-0.0302453
ENSG00000254893		-0.030618	-0.0305785	-0.0305982
ENSG00000248854	HNRNPH1P3	-0.0406403	-0.0208776	-0.0307589
ENSG00000201931	RNA5SP172	-0.058008	-0.00410894	-0.0310585
ENSG00000242162		-0.058008	-0.00410894	-0.0310585
ENSG00000265611	MIR5010	-0.058008	-0.00410894	-0.0310585
ENSG00000233820		-0.0551385	-0.00729353	-0.031216
ENSG00000273061		-0.0551385	-0.00729353	-0.031216
ENSG00000271918		-0.0551385	-0.00791119	-0.0315248
ENSG00000227540		-0.0299121	-0.0334437	-0.0316779
ENSG00000260260		-0.0299121	-0.0334437	-0.0316779
ENSG00000254473		-0.028096	-0.0366283	-0.0323621
ENSG00000221230	MIR548L	-0.0142227	-0.0511607	-0.0326917
ENSG00000273344	PAXIP1-AS1	-0.028096	-0.037618	-0.032857
ENSG00000250802	ZBED3-AS1	-0.0354027	-0.0305785	-0.0329906
ENSG00000257337		-0.0354612	-0.0305785	-0.0330198
ENSG00000260806		-0.0360862	-0.0305785	-0.0333323
ENSG00000263897	MIR4669	-0.00736522	-0.0599132	-0.0336392
ENSG00000236792		-0.028096	-0.0411678	-0.0346319
ENSG00000225470	JPX	-0.0292286	-0.0411678	-0.0351982
ENSG00000099251	HSD17B7P2	-0.0299121	-0.0411678	-0.03554
ENSG00000242338	BMS1P4	-0.0551385	-0.0178829	-0.0365107
ENSG00000250299	MRPS31P4	-0.0499053	-0.0249865	-0.0374459
ENSG00000201966	RNA5-8SP4	-0.0298536	-0.0457107	-0.0377821
ENSG00000215424	MCM3AP-AS1	-0.0360862	-0.0411678	-0.038627
ENSG00000207279	SNORD116-24	-0.058008	-0.0208776	-0.0394428
ENSG00000214181	DDX6P2	-0.058008	-0.0208776	-0.0394428
ENSG00000241923		-0.058008	-0.0208776	-0.0394428
ENSG00000253954	HMGN1P38	-0.058008	-0.0208776	-0.0394428
ENSG00000261474		-0.058008	-0.0208776	-0.0394428
ENSG00000267321		-0.0586331	-0.0208776	-0.0397553
ENSG00000261589		-0.0499053	-0.0305785	-0.0402419
ENSG00000179523	EIF3J-AS1	-0.0299121	-0.051456	-0.0406841
ENSG00000229897	SEPT7P7	-0.0299121	-0.051456	-0.0406841
ENSG00000196912	ANKRD36B	-0.058008	-0.0249865	-0.0414973
ENSG00000265649	MIR4709	-0.058008	-0.0249865	-0.0414973
ENSG00000229043		-0.0325916	-0.051456	-0.0420238
ENSG00000152487	ARL5B-AS1	-0.0551385	-0.0305785	-0.0428585
ENSG00000207625	MIR128-2	-0.0551385	-0.0305785	-0.0428585
ENSG00000223220		-0.0551385	-0.0305785	-0.0428585
ENSG00000254554		-0.0551385	-0.0305785	-0.0428585
ENSG00000257122	RRN3P3	-0.0551385	-0.0305785	-0.0428585
ENSG00000265417		-0.0551385	-0.0305785	-0.0428585
ENSG00000265520	MIR548V	-0.0551385	-0.0305785	-0.0428585
ENSG00000272716		-0.0551385	-0.0305785	-0.0428585
ENSG00000259032	ENSAP2	-0.026359	-0.0599132	-0.0431361
ENSG00000199564	RNA5SP502	-0.028096	-0.0599132	-0.0440046
ENSG00000231889	TRAF3IP2-AS1	-0.028096	-0.0599132	-0.0440046
ENSG00000237773		-0.028096	-0.0599132	-0.0440046
ENSG00000241015	TPM3P9	-0.028096	-0.0599132	-0.0440046
ENSG00000263892	MIR4667	-0.028096	-0.0599132	-0.0440046
ENSG00000266203	MIR5585	-0.028096	-0.0599132	-0.0440046
ENSG00000200649	RNA5SP343	-0.058008	-0.0305785	-0.0442933
ENSG00000207701	MIR597	-0.058008	-0.0305785	-0.0442933
ENSG00000215819	KRT18P12	-0.058008	-0.0305785	-0.0442933
ENSG00000221566	MIR1181	-0.058008	-0.0305785	-0.0442933
ENSG00000229989	MIR181A1HG	-0.058008	-0.0305785	-0.0442933
ENSG00000230568	SF3A3P1	-0.058008	-0.0305785	-0.0442933
ENSG00000234350		-0.058008	-0.0305785	-0.0442933
ENSG00000251411		-0.058008	-0.0305785	-0.0442933
ENSG00000260257		-0.058008	-0.0305785	-0.0442933
ENSG00000260563		-0.058008	-0.0305785	-0.0442933
ENSG00000262468		-0.058008	-0.0305785	-0.0442933
ENSG00000263004		-0.058008	-0.0305785	-0.0442933
ENSG00000272606		-0.058008	-0.0305785	-0.0442933
ENSG00000273391		-0.058008	-0.0305785	-0.0442933
ENSG00000229586		-0.0586331	-0.0305785	-0.0446058
ENSG00000235095		-0.0586331	-0.0305785	-0.0446058
ENSG00000271738		-0.0586331	-0.0305785	-0.0446058
ENSG00000216009	MIR874	-0.0299121	-0.0599132	-0.0449127
ENSG00000232368	FTLP2	-0.0299121	-0.0599132	-0.0449127
ENSG00000251705	RNA5-8SP6	-0.0299121	-0.0599132	-0.0449127
ENSG00000256383		-0.0299121	-0.0599132	-0.0449127
ENSG00000257167	TMPO-AS1	-0.0299121	-0.0599132	-0.0449127
ENSG00000257913		-0.0299121	-0.0599132	-0.0449127
ENSG00000265692		-0.0299121	-0.0599132	-0.0449127
ENSG00000266761	MIR3194	-0.0299121	-0.0599132	-0.0449127
ENSG00000267309		-0.0299121	-0.0599132	-0.0449127
ENSG00000260267		-0.0862541	-0.00410894	-0.0451815
ENSG00000206651		-0.0862541	-0.00412915	-0.0451916
ENSG00000231770	TMEM44-AS1	-0.086729	-0.00410894	-0.045419
ENSG00000272923		-0.086729	-0.00410894	-0.045419
ENSG00000206659		-0.0299121	-0.061632	-0.0457721
ENSG00000207798	MIR216A	-0.0551385	-0.0366283	-0.0458834
ENSG00000221406	MIR320B2	-0.0325916	-0.0599132	-0.0462524
ENSG00000271976		-0.0862541	-0.00729353	-0.0467738
ENSG00000269837		-0.0135977	-0.0807908	-0.0471943
ENSG00000267100	ILF3-AS1	-0.00725258	-0.0881015	-0.0476771
ENSG00000265623	MIR3139	-0.0354612	-0.0599132	-0.0476872
ENSG00000244153	WWP1P1	-0.0551385	-0.0411678	-0.0481532
ENSG00000247498		-0.058008	-0.0411678	-0.0495879
ENSG00000271318		-0.058008	-0.0411678	-0.0495879
ENSG00000225377		-0.0812038	-0.0208776	-0.0510407
ENSG00000181260	MTHFD2P7	-0.086729	-0.0208776	-0.0538033
ENSG00000213371	NAP1L1P3	-0.086729	-0.0208776	-0.0538033
ENSG00000240875	LINC00886	-0.0582854	-0.051456	-0.0548707
ENSG00000199075	MIR26A1	-0.0850506	-0.0249865	-0.0550185
ENSG00000207245	SNORD116-29	-0.0586331	-0.051456	-0.0550445
ENSG00000264796	MIR5009	-0.0823364	-0.029288	-0.0558122
ENSG00000264326	MIR4657	-0.0812038	-0.0305785	-0.0558911
ENSG00000264732	MIR4638	-0.0551385	-0.0599132	-0.0575259
ENSG00000270170	NCBP2-AS2	-0.0849921	-0.0305785	-0.0577853
ENSG00000234420	ZNF37BP	-0.0850506	-0.0305785	-0.0578145
ENSG00000259086		-0.0850506	-0.0305785	-0.0578145
ENSG00000261879		-0.0850506	-0.0305785	-0.0578145
ENSG00000264737	MIR4511	-0.0850506	-0.0305785	-0.0578145
ENSG00000266533	MIR3619	-0.028096	-0.0881015	-0.0580987
ENSG00000254860	TMEM9B-AS1	-0.0862541	-0.0305785	-0.0584163
ENSG00000221062	MIR1292	-0.086729	-0.0305785	-0.0586537
ENSG00000231369		-0.086729	-0.0305785	-0.0586537
ENSG00000244563		-0.086729	-0.0305785	-0.0586537
ENSG00000256982		-0.086729	-0.0305785	-0.0586537
ENSG00000272335		-0.086729	-0.0305785	-0.0586537
ENSG00000273314		-0.086729	-0.0305785	-0.0586537
ENSG00000239180		-0.113772	-0.00410894	-0.0589402
ENSG00000214135		-0.058008	-0.0599132	-0.0589606
ENSG00000217950		-0.058008	-0.0599132	-0.0589606
ENSG00000223473		-0.058008	-0.0599132	-0.0589606
ENSG00000237886		-0.058008	-0.0599132	-0.0589606
ENSG00000258655	ARHGAP5-AS1	-0.058008	-0.0599132	-0.0589606
ENSG00000227199	ST7-AS1	-0.0299121	-0.0881015	-0.0590068
ENSG00000263628	MIR3155A	-0.0299121	-0.0881015	-0.0590068
ENSG00000265828	MIR3939	-0.0299121	-0.0881015	-0.0590068
ENSG00000226310		-0.0586331	-0.0599132	-0.0592731
ENSG00000269640		-0.0586331	-0.0599132	-0.0592731
ENSG00000199132	MIR450A1	-0.058008	-0.0609029	-0.0594555
ENSG00000235560		-0.086729	-0.0334437	-0.0600864
ENSG00000245060	LINC00847	-0.0903096	-0.0305785	-0.060444
ENSG00000218014	KRT19P1	-0.113772	-0.00791119	-0.0608414
ENSG00000200506		-0.088569	-0.0334437	-0.0610063
ENSG00000183666	GUSBP1	-0.00736522	-0.11523	-0.0612974
ENSG00000264314	MIR548AT	-0.058008	-0.0648166	-0.0614123
ENSG00000161912	ADCY10P1	-0.11435	-0.0101588	-0.0622544
ENSG00000232611		-0.108121	-0.0208776	-0.0644995
ENSG00000216001	MIR450B	-0.0299121	-0.100579	-0.0652458
ENSG00000211563	MIR3065	-0.107816	-0.0241296	-0.0659727
ENSG00000211563	MIR338	-0.107816	-0.0241296	-0.0659727
ENSG00000262160		-0.113725	-0.0208776	-0.0673014
ENSG00000250326		-0.10636	-0.0305785	-0.0684692
ENSG00000264066	MIR451B	-0.0299121	-0.107502	-0.068707
ENSG00000264066	MIR4732	-0.0299121	-0.107502	-0.068707
ENSG00000264066	MIR451A	-0.0299121	-0.107502	-0.068707
ENSG00000264066	MIR144	-0.0299121	-0.107502	-0.068707
ENSG00000241007	SEPT7P6	-0.0775805	-0.0599132	-0.0687468
ENSG00000268364	SMC5-AS1	-0.086729	-0.051456	-0.0690925
ENSG00000266618	MIR4742	-0.058008	-0.0807908	-0.0693994
ENSG00000264052	MIR3655	-0.136272	-0.00410894	-0.0701905
ENSG00000223960		-0.136609	-0.00410894	-0.070359
ENSG00000207632	MIR588	-0.0812038	-0.0599132	-0.0705585
ENSG00000267422		-0.138513	-0.00410894	-0.0713107
ENSG00000227344	HAUS6P1	-0.112613	-0.0305785	-0.0715958
ENSG00000180385	EMC3-AS1	-0.139837	-0.00410894	-0.0719729
ENSG00000201415	RNA5SP204	-0.113772	-0.0305785	-0.072175
ENSG00000234608	MAPKAPK5-AS1	-0.113772	-0.0305785	-0.072175
ENSG00000236552	RPL13AP5	-0.113772	-0.0305785	-0.072175
ENSG00000232024	LSM12P1	-0.0849921	-0.0599132	-0.0724527
ENSG00000199104	MIR346	-0.11435	-0.0305785	-0.0724643
ENSG00000254615		-0.11435	-0.0305785	-0.0724643
ENSG00000263593	MIR4804	-0.11435	-0.0305785	-0.0724643
ENSG00000267080	ASB16-AS1	-0.11435	-0.0305785	-0.0724643
ENSG00000241764		-0.0299121	-0.11523	-0.0725709
ENSG00000264931	MIR3138	-0.0299121	-0.11523	-0.0725709
ENSG00000234028		-0.058008	-0.0881015	-0.0730548
ENSG00000221464	MIR1271	-0.0862541	-0.0599132	-0.0730837
ENSG00000252699		-0.086729	-0.0599132	-0.0733211
ENSG00000177337	DLGAP1-AS1	-0.0586331	-0.0881015	-0.0733673
ENSG00000212802	RPL15P3	-0.113772	-0.0334437	-0.0736076
ENSG00000213753	CENPBD1P1	-0.118846	-0.0305785	-0.0747121
ENSG00000251669	FAM86EP	-0.118846	-0.0305785	-0.0747121
ENSG00000242294	STAG3L5P	-0.058008	-0.0919447	-0.0749764
ENSG00000228782	MRPL45P2	-0.0306644	-0.120816	-0.0757403
ENSG00000227850	SEPT2P1	-0.111057	-0.0411678	-0.0761126
ENSG00000200314		-0.0266121	-0.12572	-0.0761658
ENSG00000261326		-0.134508	-0.0208776	-0.0776927
ENSG00000203644		-0.11435	-0.0411678	-0.077759
ENSG00000228828		-0.0142227	-0.141374	-0.0777985
ENSG00000224785		-0.138034	-0.0208776	-0.0794555
ENSG00000263909	MIR5000	-0.028096	-0.135493	-0.0817947
ENSG00000235472	EIF4A1P7	-0.0551385	-0.108979	-0.0820588
ENSG00000244041	LINC01011	-0.0850506	-0.0807908	-0.0829207
ENSG00000240498	CDKN2B-AS1	-0.10636	-0.0599132	-0.0831366
ENSG00000227682	ATP5A1P2	-0.145448	-0.0208776	-0.0831628
ENSG00000272045	MIR1914	-0.028096	-0.141374	-0.0847351
ENSG00000212024	MIR550A3	-0.139837	-0.0305785	-0.0852076
ENSG00000201470	RNY4P7	-0.058008	-0.112822	-0.0854151
ENSG00000272093		-0.140952	-0.0305785	-0.0857654
ENSG00000269904	MAP2K4P1	-0.141393	-0.0305785	-0.0859855
ENSG00000265134	MIR3191	-0.058008	-0.11523	-0.0866188
ENSG00000265134	MIR3190	-0.058008	-0.11523	-0.0866188
ENSG00000201763	RNA5SP267	-0.113772	-0.0599132	-0.0868424
ENSG00000226688	ENTPD1-AS1	-0.113772	-0.0599132	-0.0868424
ENSG00000252267	RNA5SP495	-0.113772	-0.0599132	-0.0868424
ENSG00000263900		-0.113772	-0.0599132	-0.0868424
ENSG00000266589	MIR4512	-0.0586331	-0.11523	-0.0869313
ENSG00000255135		-0.11435	-0.0599132	-0.0871317
ENSG00000256599		-0.11435	-0.0599132	-0.0871317
ENSG00000221430	MIR1294	-0.0597895	-0.114905	-0.0873471
ENSG00000201059	RNA5SP336	-0.113772	-0.061632	-0.0877018
ENSG00000187953	PMS2CL	-0.086729	-0.0887601	-0.0877445
ENSG00000219790	OSTCP6	-0.142446	-0.0411678	-0.091807
ENSG00000270081		-0.165281	-0.0208776	-0.0930791
ENSG00000236852		-0.136214	-0.051456	-0.0938348
ENSG00000239521		-0.190937	-0.00410894	-0.0975229
ENSG00000237161		-0.164523	-0.0305785	-0.0975508
ENSG00000202337	RNU6-8	-0.0989612	-0.0975312	-0.0982462
ENSG00000233791	LINC01136	-0.0299121	-0.166605	-0.0982583
ENSG00000265455	MIR4700	-0.192614	-0.00410894	-0.0983615
ENSG00000267575		-0.166608	-0.0305785	-0.0985935
ENSG00000207976	MIR607	-0.028096	-0.169493	-0.0987944
ENSG00000259943		-0.0360862	-0.162252	-0.099169
ENSG00000213468		-0.139837	-0.0599132	-0.099875
ENSG00000266580	MIR4254	-0.0862541	-0.114905	-0.100579
ENSG00000170846		-0.167995	-0.0366283	-0.102312
ENSG00000244398		-0.144062	-0.061632	-0.102847
ENSG00000227671	MIR3916	-0.185425	-0.0208776	-0.103151
ENSG00000268362		-0.14965	-0.0599132	-0.104782
ENSG00000234145	NAP1L4P3	-0.195991	-0.0208776	-0.108434
ENSG00000199090	MIR326	-0.0812038	-0.13898	-0.110092
ENSG00000266110	MIR4423	-0.216922	-0.00410894	-0.110516
ENSG00000211583	MIR767	-0.0299121	-0.191278	-0.110595
ENSG00000221102	SNORA11B	-0.191383	-0.0305785	-0.110981
ENSG00000207820	MIR545	-0.192614	-0.0305785	-0.111596
ENSG00000213178		-0.219216	-0.00410894	-0.111663
ENSG00000239407		-0.215714	-0.00791211	-0.111813
ENSG00000215817	ZC3H11B	-0.111116	-0.112822	-0.111969
ENSG00000272263		-0.19406	-0.0305785	-0.112319
ENSG00000236264	RPL26P30	-0.194376	-0.0305785	-0.112477
ENSG00000224597	PTCHD3P1	-0.137829	-0.0881015	-0.112965
ENSG00000200211	RNY4P27	-0.0354612	-0.190982	-0.113222
ENSG00000252153	MIR2278	-0.0360862	-0.190982	-0.113534
ENSG00000207728	MIR449B	-0.219716	-0.00791119	-0.113814
ENSG00000272344	SNORD114-21	-0.139837	-0.0881015	-0.113969
ENSG00000221697	MIR1275	-0.086729	-0.141374	-0.114052
ENSG00000245149	RNF139-AS1	-0.113772	-0.114905	-0.114338
ENSG00000221214	MIR548E	-0.171104	-0.0592246	-0.115164
ENSG00000207923	MIR559	-0.139837	-0.0914814	-0.115659
ENSG00000263407	MIR4660	-0.19406	-0.0399426	-0.117001
ENSG00000207932	MIR33A	-0.172512	-0.062599	-0.117556
ENSG00000176700	SCAND2P	-0.233359	-0.00410894	-0.118734
ENSG00000248008	DYNLL1-AS1	-0.215335	-0.0305785	-0.122957
ENSG00000246090		-0.0586331	-0.188093	-0.123363
ENSG00000224546	EIF4BP3	-0.216922	-0.0305785	-0.12375
ENSG00000263421	MIR4687	-0.086729	-0.161013	-0.123871
ENSG00000242299		-0.218426	-0.0305785	-0.124502
ENSG00000260290		-0.219216	-0.0305785	-0.124897
ENSG00000126005	MMP24-AS1	-0.219716	-0.0305785	-0.125147
ENSG00000251992	SCARNA17	-0.219716	-0.0305785	-0.125147
ENSG00000265206	MIR142	-0.219716	-0.0305785	-0.125147
ENSG00000247708	STX18-AS1	-0.219216	-0.0334437	-0.12633
ENSG00000256005		-0.0862541	-0.166605	-0.126429
ENSG00000131797	CLUHP3	-0.222326	-0.0305785	-0.126452
ENSG00000207956	MIR579	-0.144062	-0.11523	-0.129646
ENSG00000199094	MIR30C2	-0.0299121	-0.232342	-0.131127
ENSG00000199187	MIR365B	-0.028096	-0.23544	-0.131768
ENSG00000188825	LINC00910	-0.136272	-0.129269	-0.132771
ENSG00000236698	EIF1AXP1	-0.179136	-0.0881015	-0.133619
ENSG00000196205	EEF1A1P5	-0.238518	-0.0305785	-0.134548
ENSG00000266593	MIR4713	-0.0586331	-0.210927	-0.13478
ENSG00000178464		-0.240438	-0.0305785	-0.135508
ENSG00000215930	MIR942	-0.232502	-0.0403551	-0.136429
ENSG00000196204	RNF216P1	-0.269181	-0.00410894	-0.136645
ENSG00000253030	MIR2116	-0.269181	-0.00410894	-0.136645
ENSG00000204253	HNRNPCP2	-0.244491	-0.0305785	-0.137535
ENSG00000200408	RNA5SP74	-0.192614	-0.0881015	-0.140358
ENSG00000238961	SNORA47	-0.192614	-0.0887601	-0.140687
ENSG00000207758	MIR532	-0.141393	-0.140135	-0.140764
ENSG00000200225	RNA5SP382	-0.194376	-0.0881015	-0.141239
ENSG00000226049	TLK2P1	-0.237501	-0.051456	-0.144478
ENSG00000214654		-0.240868	-0.051456	-0.146162
ENSG00000251862	MIR1343	-0.058008	-0.237396	-0.147702
ENSG00000179818	PCBP1-AS1	-0.244872	-0.051456	-0.148164
ENSG00000226752	PSMD5-AS1	-0.174771	-0.122372	-0.148572
ENSG00000201041	RNA5SP242	-0.267041	-0.0305785	-0.14881
ENSG00000264864	MIR3613	-0.140215	-0.15753	-0.148872
ENSG00000264480	MIR4714	-0.028096	-0.270692	-0.149394
ENSG00000181524	RPL24P4	-0.269647	-0.0305785	-0.150113
ENSG00000200021	RNA5SP448	-0.269647	-0.0305785	-0.150113
ENSG00000266235	MIR3176	-0.086729	-0.214562	-0.150646
ENSG00000265820	MIR3177	-0.11435	-0.188093	-0.151222
ENSG00000211991	MIR676	-0.171513	-0.131269	-0.151391
ENSG00000253861	SLC2A3P1	-0.277953	-0.0249865	-0.15147
ENSG00000264986	MIR5092	-0.243525	-0.0599132	-0.151719
ENSG00000179611	DGKZP1	-0.244491	-0.0599132	-0.152202
ENSG00000247315		-0.219216	-0.0893723	-0.154294
ENSG00000206573	SETD5-AS1	-0.170335	-0.138967	-0.154651
ENSG00000199461		-0.281156	-0.0305785	-0.155867
ENSG00000245937		-0.304965	-0.00729353	-0.156129
ENSG00000264624	MIR3615	-0.058008	-0.25953	-0.158769
ENSG00000249673	NOP14-AS1	-0.314086	-0.00410894	-0.159097
ENSG00000236144		-0.289814	-0.0305785	-0.160196
ENSG00000260054		-0.291539	-0.0305785	-0.161059
ENSG00000221203	MIR1262	-0.204017	-0.118535	-0.161276
ENSG00000207608	MIR127	-0.111116	-0.21186	-0.161488
ENSG00000201595	RNA5SP132	-0.235591	-0.0881015	-0.161846
ENSG00000235706	DICER1-AS1	-0.109507	-0.214562	-0.162035
ENSG00000213315		-0.293599	-0.0305785	-0.162089
ENSG00000264607	MIR3173	-0.238518	-0.0881015	-0.16331
ENSG00000258427	RBM8B	-0.192614	-0.136107	-0.164361
ENSG00000271122		-0.167458	-0.164512	-0.165985
ENSG00000248473		-0.244491	-0.0881015	-0.166296
ENSG00000264350	SNRPGP2	-0.312479	-0.0203093	-0.166394
ENSG00000235883		-0.281725	-0.051456	-0.166591
ENSG00000267959	MIR3188	-0.0354612	-0.301858	-0.168659
ENSG00000265037	MIR4707	-0.0586331	-0.281004	-0.169819
ENSG00000267350		-0.268443	-0.0717463	-0.170095
ENSG00000223959	AFG3L1P	-0.312871	-0.0305785	-0.171725
ENSG00000221039	MIR1286	-0.0918032	-0.255929	-0.173866
ENSG00000256211		-0.333542	-0.0208776	-0.17721
ENSG00000178082	TWF1P1	-0.33574	-0.0208776	-0.178309
ENSG00000255198	SNHG9	-0.244872	-0.114905	-0.179889
ENSG00000227968		-0.308065	-0.0599132	-0.183989
ENSG00000207524	RNU6-33P	-0.364197	-0.00410894	-0.184153
ENSG00000198618	PPIAP22	-0.34109	-0.0305785	-0.185834
ENSG00000213763	ACTBP2	-0.34109	-0.0305785	-0.185834
ENSG00000258645	HSPE1P2	-0.341424	-0.0305785	-0.186001
ENSG00000263675	MIR5581	-0.153586	-0.224057	-0.188822
ENSG00000266620	MIR5001	-0.317911	-0.0632276	-0.190569
ENSG00000266407	MIR3157	-0.364519	-0.0177869	-0.191153
ENSG00000237350	CDC42P6	-0.357686	-0.0334437	-0.195565
ENSG00000249565	SERBP1P5	-0.387066	-0.00410894	-0.195588
ENSG00000263511	MIR5699	-0.0812038	-0.316556	-0.19888
ENSG00000207964	MIR628	-0.364519	-0.0337472	-0.199133
ENSG00000213300	HNRNPA3P6	-0.380676	-0.0208776	-0.200777
ENSG00000200558	RNA5SP429	-0.058008	-0.345938	-0.201973
ENSG00000207784	MIR542	-0.219005	-0.188585	-0.203795
ENSG00000264141	MIR3928	-0.242378	-0.166605	-0.204491
ENSG00000252695	MIR2276	-0.0954265	-0.322125	-0.208776
ENSG00000225031	EIF4BP7	-0.385147	-0.0334437	-0.209295
ENSG00000227036	LINC00511	-0.385332	-0.0334437	-0.209388
ENSG00000226471		-0.218426	-0.202277	-0.210352
ENSG00000264063	MIR3687	-0.390895	-0.0305785	-0.210737
ENSG00000199900	RNA5SP463	-0.337546	-0.0881015	-0.212824
ENSG00000233137		-0.3542	-0.0722601	-0.21323
ENSG00000229719	MIR194-2	-0.240438	-0.190982	-0.21571
ENSG00000226221		-0.408329	-0.0305785	-0.219454
ENSG00000207698	MIR32	-0.231635	-0.223331	-0.227483
ENSG00000251725	MIR2277	-0.058008	-0.39794	-0.227974
ENSG00000265178	MIR4728	-0.058008	-0.39794	-0.227974
ENSG00000213363	RPS3P6	-0.452765	-0.00410894	-0.228437
ENSG00000252231	RNA5SP67	-0.267267	-0.190982	-0.229125
ENSG00000215835		-0.429132	-0.0305785	-0.229855
ENSG00000226723		-0.44536	-0.0146983	-0.230029
ENSG00000223559		-0.379541	-0.0807908	-0.230166
ENSG00000199994	RNA5SP145	-0.431151	-0.0305785	-0.230865
ENSG00000260276		-0.431622	-0.0305785	-0.2311
ENSG00000229645	LINC00341	-0.40984	-0.0599132	-0.234876
ENSG00000121089	NACA3P	-0.411411	-0.0594455	-0.235428
ENSG00000264966	MIR5094	-0.189301	-0.285807	-0.237554
ENSG00000200434	RNA5-8SP2	-0.219716	-0.258407	-0.239062
ENSG00000207175	RNU1-67P	-0.471899	-0.00729353	-0.239596
ENSG00000266037	RN7SL3	-0.422682	-0.0599132	-0.241298
ENSG00000267195	MIR212	-0.238518	-0.245159	-0.241838
ENSG00000257621		-0.40302	-0.0807908	-0.241906
ENSG00000255729		-0.330838	-0.156397	-0.243618
ENSG00000221803	SNORD23	-0.407694	-0.0881015	-0.247898
ENSG00000263414	MIR3187	-0.0299121	-0.466538	-0.248225
ENSG00000196922	ZNF252P	-0.442867	-0.0543213	-0.248594
ENSG00000255990		-0.494359	-0.0101588	-0.252259
ENSG00000266638		-0.422682	-0.0881015	-0.255392
ENSG00000207789	MIR26A2	-0.332416	-0.183333	-0.257874
ENSG00000264279	MIR4786	-0.0850506	-0.466538	-0.275795
ENSG00000265201	MIR4677	-0.293956	-0.261579	-0.277767
ENSG00000265423	MIR4652	-0.289764	-0.277673	-0.283718
ENSG00000221035	MIR486	-0.086729	-0.482715	-0.284722
ENSG00000261824	LINC00662	-0.564797	-0.0128145	-0.288806
ENSG00000233830	EIF4HP1	-0.56998	-0.0208776	-0.295429
ENSG00000251022	THAP9-AS1	-0.575007	-0.0175224	-0.296265
ENSG00000221394	MIR1229	-0.163287	-0.452695	-0.307991
ENSG00000266509	MIR3934	-0.40984	-0.210927	-0.310383
ENSG00000266722	MIR3940	-0.244872	-0.37972	-0.312296
ENSG00000259516	ANP32AP1	-0.573392	-0.0599132	-0.316652
ENSG00000264944	MIR3620	-0.0551385	-0.586807	-0.320973
ENSG00000258498	DIO3OS	-0.461041	-0.188093	-0.324567
ENSG00000211575	MIR760	-0.028096	-0.627196	-0.327646
ENSG00000183900		-0.597234	-0.0599132	-0.328573
ENSG00000254612		-0.590775	-0.0688141	-0.329794
ENSG00000202515	VTRNA1-3	-0.424919	-0.237396	-0.331157
ENSG00000251698	RNA5SP445	-0.647655	-0.0146983	-0.331177
ENSG00000257285		-0.611558	-0.0599132	-0.335735
ENSG00000207233	SNORA37	-0.361024	-0.322125	-0.341575
ENSG00000253341		-0.636049	-0.061632	-0.34884
ENSG00000207656	MIR489	-0.0299121	-0.66999	-0.349951
ENSG00000221164		-0.268443	-0.433054	-0.350749
ENSG00000201512	SNORA71C	-0.612052	-0.11523	-0.363641
ENSG00000265083	MIR3691	-0.371455	-0.39859	-0.385023
ENSG00000264292	MIR2467	-0.357686	-0.41262	-0.385153
ENSG00000200036	RNA5SP65	-0.728787	-0.0632276	-0.396007
ENSG00000207732	MIR218-1	-0.728227	-0.0697504	-0.398989
ENSG00000213553	RPLP0P6	-0.74124	-0.061632	-0.401436
ENSG00000199130	MIR365A	-0.167995	-0.669168	-0.418582
ENSG00000199771	RNA5SP426	-0.663315	-0.181058	-0.422186
ENSG00000265395	MIR3944	-0.219216	-0.627196	-0.423206
ENSG00000267427		-0.842579	-0.0399426	-0.441261
ENSG00000207952	MIR624	-0.632536	-0.253087	-0.442811
ENSG00000206838	SNORA5A	-0.755926	-0.137901	-0.446914
ENSG00000260778	MIR940	-0.0551385	-0.840928	-0.448033
ENSG00000199787		-0.687251	-0.229002	-0.458127
ENSG00000221634	MIR1276	-0.246634	-0.673081	-0.459857
ENSG00000139239	RPL14P1	-0.894445	-0.0408683	-0.467657
ENSG00000200521		-0.652861	-0.304352	-0.478607
ENSG00000218208		-0.943937	-0.0208776	-0.482407
ENSG00000207975	MIR181B1	-0.494518	-0.517475	-0.505997
ENSG00000261441		-0.681838	-0.33156	-0.506699
ENSG00000221333	MIR548K	-0.740456	-0.287561	-0.514009
ENSG00000223131	RNA5SP304	-0.836197	-0.198649	-0.517423
ENSG00000199072	MIRLET7F1	-0.847007	-0.200797	-0.523902
ENSG00000264157	MIR3127	-0.213825	-0.848411	-0.531118
ENSG00000249020	SNORA58	-0.910228	-0.167052	-0.53864
ENSG00000252577	SCARNA20	-0.028096	-1.05273	-0.540411
ENSG00000208883	SNORD96B	-0.51868	-0.564937	-0.541809
ENSG00000235552	RPL6P27	-1.07663	-0.0361944	-0.556411
ENSG00000201356	RNA5SP500	-0.86481	-0.277413	-0.571111
ENSG00000207962	MIR30C1	-0.910129	-0.233	-0.571564
ENSG00000252950	RNA5SP490	-0.874029	-0.315205	-0.594617
ENSG00000267519	MIR24-2	-0.917471	-0.287116	-0.602293
ENSG00000207217		-0.863913	-0.35325	-0.608582
ENSG00000208006	MIR16-1	-1.03483	-0.182447	-0.608637
ENSG00000207609	MIR491	-0.839729	-0.414512	-0.627121
ENSG00000221585	MIR1226	-0.340773	-0.92277	-0.631771
ENSG00000207948	MIR328	-0.589011	-0.681848	-0.635429
ENSG00000252316	RNY4	-0.564502	-0.714211	-0.639357
ENSG00000221419	MIR1287	-0.791166	-0.508517	-0.649842
ENSG00000212498	SNORD86	-0.762898	-0.552975	-0.657937
ENSG00000266437	MIR4746	-0.452572	-0.867929	-0.66025
ENSG00000264355		-0.991886	-0.331842	-0.661864
ENSG00000221716	SNORA11	-0.74	-0.587513	-0.663757
ENSG00000206811	SNORA10	-1.05453	-0.27701	-0.66577
ENSG00000267532	MIR497HG	-0.118698	-1.21773	-0.668215
ENSG00000221366	MIR1306	-0.342059	-1.002	-0.672032
ENSG00000223249		-1.34283	-0.00729353	-0.675062
ENSG00000200623	SNORD18A	-1.30347	-0.0663322	-0.684903
ENSG00000229132	EIF4A1P10	-0.514028	-0.871476	-0.692752
ENSG00000208005	MIR503	-0.50243	-0.897137	-0.699784
ENSG00000199024	MIR103A2	-1.39892	-0.032779	-0.71585
ENSG00000266320	MIR3909	-0.860653	-0.572787	-0.71672
ENSG00000207996	MIR301A	-0.229243	-1.22295	-0.726097
ENSG00000207947	MIR152	-0.387062	-1.07047	-0.728766
ENSG00000201772	SNORA5C	-1.37142	-0.0904759	-0.730948
ENSG00000198972	MIRLET7E	-0.376572	-1.09524	-0.735907
ENSG00000230530	LIMD1-AS1	-1.22001	-0.253938	-0.736975
ENSG00000252139		-1.22193	-0.321278	-0.771604
ENSG00000261889		-1.03967	-0.514046	-0.776857
ENSG00000198995	MIR340	-0.292692	-1.2732	-0.782946
ENSG00000202474	RNA5SP283	-1.56848	-0.0660985	-0.817289
ENSG00000199066	MIR330	-1.42101	-0.289741	-0.855377
ENSG00000201839	SNORD114-3	-1.19246	-0.530986	-0.861725
ENSG00000215998	MIR935	-1.49492	-0.237441	-0.866178
ENSG00000221598	MIR1249	-0.876413	-0.872729	-0.874571
ENSG00000199121	MIR26B	-1.5385	-0.218672	-0.878584
ENSG00000199168	MIR374A	-1.46276	-0.398738	-0.930751
ENSG00000265238	MIR3614	-1.82323	-0.0428135	-0.933023
ENSG00000206597	SNORA57	-1.34225	-0.544021	-0.943135
ENSG00000208023	MIR185	-1.44323	-0.447746	-0.94549
ENSG00000199266	SNORA60	-1.48192	-0.42325	-0.952586
ENSG00000230937	MIR205HG	-0.68649	-1.24889	-0.967691
ENSG00000221052	MIR1266	-0.217551	-1.73915	-0.978351
ENSG00000222190	MIR1910	-1.15773	-0.808139	-0.982933
ENSG00000212402	SNORA74B	-1.23631	-0.745651	-0.990982
ENSG00000202566	MIR421	-0.269267	-1.7307	-0.999986
ENSG00000270141	TERC	-1.04797	-0.971691	-1.00983
ENSG00000221241	SNORD88A	-1.28986	-0.738402	-1.01413
ENSG00000207585	MIR181D	-1.94746	-0.0903371	-1.0189
ENSG00000207571	MIR615	-1.72071	-0.318248	-1.01948
ENSG00000198986	MIRLET7A3	-1.49381	-0.567412	-1.03061
ENSG00000207839	MIR33B	-0.947296	-1.11619	-1.03174
ENSG00000207523	SNORA66	-1.65865	-0.426872	-1.04276
ENSG00000207008	SNORA54	-1.73255	-0.374704	-1.05363
ENSG00000207648	MIR192	-1.90008	-0.211728	-1.05591
ENSG00000222370	SNORA36B	-2.04361	-0.144034	-1.09382
ENSG00000266402	SNORA76	-1.53536	-0.698185	-1.11677
ENSG00000253190		-1.69862	-0.56351	-1.13107
ENSG00000240616		-2.35962	-0.030732	-1.19517
ENSG00000209645	SNORD105	-2.29271	-0.112276	-1.20249
ENSG00000206755	SNORA30	-1.52504	-0.897341	-1.21119
ENSG00000200087	SNORA73B	-2.33861	-0.0893585	-1.21399
ENSG00000268649	MIR296	-0.0775192	-2.40914	-1.24333
ENSG00000200394	SNORA38B	-2.27762	-0.26333	-1.27047
ENSG00000207779	MIR15B	-1.66988	-0.890522	-1.2802
ENSG00000207475	SNORA42	-2.02469	-0.539666	-1.28218
ENSG00000223749	MIR503HG	-2.09311	-0.47276	-1.28294
ENSG00000238742	MIR2110	-1.75561	-0.813775	-1.28469
ENSG00000207691	MIR183	-1.84295	-0.760746	-1.30185
ENSG00000207088	SNORA7B	-1.27333	-1.34793	-1.31063
ENSG00000200792	SNORA80	-1.34362	-1.29815	-1.32088
ENSG00000207965	MIR629	-1.7506	-0.901325	-1.32596
ENSG00000232956	SNHG15	-2.36093	-0.291823	-1.32638
ENSG00000207737	MIR181B2	-1.35799	-1.33136	-1.34467
ENSG00000199122	MIR148B	-2.57206	-0.267998	-1.42003
ENSG00000221445	MIR1301	-1.91174	-0.939008	-1.42538
ENSG00000199051	MIR361	-1.97321	-0.8803	-1.42675
ENSG00000199047	MIR378A	-2.11334	-0.773613	-1.44348
ENSG00000199023	MIR339	-1.07085	-1.82779	-1.44932
ENSG00000199133	MIRLET7D	-1.78737	-1.15556	-1.47146
ENSG00000239183	SNORA84	-1.94245	-1.02847	-1.48546
ENSG00000264661	MIR3200	-1.37653	-1.64244	-1.50948
ENSG00000221540	MIR1180	-1.17171	-1.84853	-1.51012
ENSG00000206775	SNORD37	-2.67878	-0.350787	-1.51479
ENSG00000264346		-1.39311	-1.66255	-1.52783
ENSG00000207633	MIR505	-2.04805	-1.07895	-1.5635
ENSG00000207863	MIR125B2	-0.631473	-2.50917	-1.57032
ENSG00000208034	MIR92A2	-2.37134	-0.860517	-1.61593
ENSG00000211517	MIR671	-1.97935	-1.29364	-1.63649
ENSG00000252481	SCARNA13	-2.07853	-1.20901	-1.64377
ENSG00000199179	MIRLET7I	-2.50262	-0.797712	-1.65017
ENSG00000207563	MIR23B	-1.70279	-1.6071	-1.65495
ENSG00000207875	MIRLET7B	-3.08791	-0.290954	-1.68943
ENSG00000249784	SCARNA22	-0.573012	-2.85733	-1.71517
ENSG00000207654	MIR128-1	-1.66135	-1.80235	-1.73185
ENSG00000225091	SNORA71A	-1.29498	-2.19972	-1.74735
ENSG00000252213		-3.17128	-0.329591	-1.75043
ENSG00000198997	MIR107	-2.97053	-0.586088	-1.77831
ENSG00000251733	SCARNA8	-3.44869	-0.109703	-1.7792
ENSG00000208013	MIR652	-1.44363	-2.14365	-1.79364
ENSG00000199038	MIR210	-2.35867	-1.24947	-1.80407
ENSG00000206630	SNORD60	-3.6416	-0.0312778	-1.83644
ENSG00000207614	MIR193A	-0.984501	-2.71812	-1.85131
ENSG00000221381	SNORD88B	-1.57757	-2.18153	-1.87955
ENSG00000199785	SNORA52	-3.65364	-0.112433	-1.88304
ENSG00000207864	MIR27B	-2.69493	-1.12045	-1.90769
ENSG00000207611	MIR149	-2.61676	-1.23388	-1.92532
ENSG00000199085	MIR148A	-3.62921	-0.227494	-1.92835
ENSG00000207496	SNORA7A	-2.15739	-1.76443	-1.96091
ENSG00000270022	RNU12	-3.2446	-0.685173	-1.96489
ENSG00000270103	RNU11	-3.498	-0.464897	-1.98145
ENSG00000207944	MIR574	-3.30915	-0.654027	-1.98159
ENSG00000251898	SCARNA11	-3.35214	-0.692618	-2.02238
ENSG00000221063	MIR1296	-2.46861	-1.59529	-2.03195
ENSG00000208036	MIR106B	-2.95382	-1.1173	-2.03556
ENSG00000252906	SCARNA3	-3.78828	-0.301292	-2.04479
ENSG00000212607	SNORA45	-3.87182	-0.243129	-2.05747
ENSG00000238917	SNORD10	-3.80285	-0.353145	-2.078
ENSG00000207980	MIR23A	-4.04242	-0.116102	-2.07926
ENSG00000259001	RPPH1	-3.40098	-0.939213	-2.1701
ENSG00000207990	MIR182	-4.08892	-0.261958	-2.17544
ENSG00000264994	SNORD92	-3.83098	-0.565155	-2.19807
ENSG00000199053	MIR324	-2.42821	-2.00992	-2.21906
ENSG00000207759	MIR181A1	-2.98374	-1.45881	-2.22128
ENSG00000199082	MIR342	-1.16959	-3.29149	-2.23054
ENSG00000254324	MIR151A	-4.4486	-0.0181271	-2.23336
ENSG00000202031	SNORD38A	-4.27474	-0.21114	-2.24294
ENSG00000198984	MIR345	-2.3366	-2.15737	-2.24699
ENSG00000272213	MIR484	-2.31196	-2.20697	-2.25947
ENSG00000200959	SNORA74A	-4.33614	-0.21384	-2.27499
ENSG00000202363	SNORA62	-4.45716	-0.109245	-2.2832
ENSG00000202111	VTRNA1-2	-3.72269	-0.883004	-2.30285
ENSG00000207973	MIR589	-2.63333	-2.01075	-2.32204
ENSG00000199032	MIR425	-3.49046	-1.1542	-2.32233
ENSG00000201302	SNORA65	-3.3674	-1.30105	-2.33422
ENSG00000212135	SNORD67	-3.17661	-1.49765	-2.33713
ENSG00000208017	MIR140	-3.07445	-1.62693	-2.35069
ENSG00000207865	MIR34A	-4.30682	-0.457526	-2.38217
ENSG00000208008	MIR125A	-4.5898	-0.176187	-2.38299
ENSG00000200141		-4.51509	-0.283322	-2.3992
ENSG00000199172	MIR331	-3.37069	-1.43916	-2.40492
ENSG00000199153	MIR30D	-4.59101	-0.243062	-2.41703
ENSG00000208772	SNORD94	-2.87577	-2.00447	-2.44012
ENSG00000199293	SNORA21	-4.28832	-0.599805	-2.44406
ENSG00000209582	SNORA48	-3.01313	-1.9099	-2.46151
ENSG00000199004	MIR21	-4.3157	-0.667024	-2.49136
ENSG00000208892	SNORA49	-4.5776	-0.433285	-2.50544
ENSG00000239127	SNORD125	-4.10772	-0.926038	-2.51688
ENSG00000202472	RNA5SP248	-3.89392	-1.2111	-2.55251
ENSG00000198973	MIR375	-3.32343	-1.82359	-2.57351
ENSG00000270066	SCARNA2	-4.63014	-0.52324	-2.57669
ENSG00000207808	MIR27A	-4.95229	-0.272467	-2.61238
ENSG00000211580	MIR769	-4.14926	-1.0946	-2.62193
ENSG00000202354	RNY3	-4.14587	-1.11263	-2.62925
ENSG00000206760	SNORA6	-5.24445	-0.0525122	-2.64848
ENSG00000207547	MIR25	-4.37005	-0.936584	-2.65332
ENSG00000209480	SNORD83B	-4.24132	-1.16709	-2.70421
ENSG00000265145	SNORD53	-4.70916	-0.702647	-2.7059
ENSG00000212304	SNORD12	-4.93197	-0.504547	-2.71826
ENSG00000207709	MIR197	-4.08676	-1.37575	-2.73126
ENSG00000266297	MIR744	-3.61352	-1.87559	-2.74455
ENSG00000200983	SNORA3	-3.89507	-1.69355	-2.79431
ENSG00000207166	SNORA68	-4.09935	-1.68827	-2.89381
ENSG00000199990	VTRNA1-1	-4.79672	-0.995709	-2.89622
ENSG00000221767	MIR1307	-2.93002	-2.88007	-2.90504
ENSG00000212283	SNORD89	-4.77489	-1.08375	-2.92932
ENSG00000207639	MIR193B	-2.93685	-3.084	-3.01042
ENSG00000238793	SNORD124	-5.83346	-0.245518	-3.03949
ENSG00000207445	SNORD15B	-4.8821	-1.19996	-3.04103
ENSG00000212158	SNORD66	-5.33186	-0.751612	-3.04174
ENSG00000223224	SNORD71	-5.05691	-1.242	-3.14946
ENSG00000200259	SNORD35A	-4.10564	-2.2188	-3.16222
ENSG00000207757	MIR93	-4.68572	-1.64371	-3.16471
ENSG00000200463	SNORD118	-5.89314	-0.45896	-3.17605
ENSG00000209702	SNORD41	-5.02204	-1.35115	-3.1866
ENSG00000200354	SNORA71D	-4.1361	-2.27022	-3.20316
ENSG00000233016	SNHG7	-6.05416	-0.509101	-3.28163
ENSG00000208037	MIR320A	-5.67326	-0.992559	-3.33291
ENSG00000235408	SNORA71B	-5.67767	-1.01023	-3.34395
ENSG00000252310	RNY5	-6.70954	-0.0156394	-3.36259
ENSG00000220988	SNORD88C	-4.586	-2.25815	-3.42207
ENSG00000263934	SNORD3A	-4.24344	-2.61541	-3.42943
ENSG00000221500	SNORD100	-6.49465	-0.404706	-3.44968
ENSG00000186594	MIR22HG	-6.66975	-0.245078	-3.45742
ENSG00000199071	MIR423	-4.96539	-2.00988	-3.48764
ENSG00000207605	MIR191	-5.9202	-1.06025	-3.49023
ENSG00000239039	SNORD13	-5.04972	-2.02898	-3.53935
ENSG00000200530	SNORD35B	-5.81956	-1.3733	-3.59643
ENSG00000265706		-6.42246	-0.811151	-3.61681
ENSG00000264549	SNORD95	-4.69345	-2.80575	-3.7496
ENSG00000202503	SNORD34	-6.50823	-1.01972	-3.76397
ENSG00000258486	RN7SL1	-5.9091	-1.72054	-3.81482
ENSG00000271748	MIR92B	-5.50508	-2.13324	-3.81916
ENSG00000207405	SNORA64	-5.0577	-3.20495	-4.13132
ENSG00000264294	SNORD55	-4.04367	-4.42473	-4.2342
ENSG00000269900	RMRP	-6.55976	-2.02201	-4.29088
ENSG00000207550	MIR99B	-6.54243	-2.32206	-4.43224
ENSG00000200084	SNORD68	-8.91372	-0.232798	-4.57326
ENSG00000201675	SNORD32A	-7.3874	-2.08339	-4.7354
ENSG00000265150	RN7SL2	-7.94334	-1.96094	-4.95214
ENSG00000200913	SNORD46	-8.25483	-1.70971	-4.98227
ENSG00000202198	RN7SK	-9.44435	-0.810177	-5.12726
ENSG00000199631	SNORD33	-7.93485	-2.69933	-5.31709
ENSG00000209482	SNORD83A	-7.8989	-2.91714	-5.40802
ENSG00000200785	SNORD8	-8.05681	-3.02815	-5.54248
ENSG00000221491	SNORA34	-7.942	-3.62613	-5.78406
ENSG00000272296	SNORD96A	-8.80709	-2.79367	-5.80038
ENSG00000238531	SNORD105B	-7.94361	-3.94698	-5.94529
ENSG00000199753	SNORD104	-8.78374	-3.21058	-5.99716
