# Supplementary material for: AKT Inhibition Promotes Nonautonomous Cancer Cell Survival
Source: Oxford University Press journal article supplement (doi:10.1158/1535-7163.mct-15-0414), 2015-12-31
Supplement: 15357163mct150414-sup-149992_2_supp_3173838_nvt1rz.xlsx [file 15357163mct150414-sup-149992_2_supp_3173838_nvt1rz.xlsx]

## Sheet: S2A.GSEA_RNA_Down
NAME	SIZE	ES	NES	NOM p-val	FDR q-val	FWER p-val	RANK AT MAX	LEADING EDGE
REACTOME_ACTIVATION_OF_CHAPERONE_GENES_BY_XBP1S	45	-0.732112	-1.9649	0	0.0392584	0.037	2619	tags=56%, list=14%, signal=65%

## Sheet: S2B.GSEA_Proteins_Down
NAME	SIZE	ES	NES	NOM p-val	FDR q-val	FWER p-val	RANK AT MAX	LEADING EDGE
REACTOME_INFLUENZA_VIRAL_RNA_TRANSCRIPTION_AND_REPLICATION	90	-0.591355	-2.30542	0	0	0	1684	tags=60%, list=26%, signal=80%
REACTOME_CYTOSOLIC_TRNA_AMINOACYLATION	23	-0.780777	-2.29172	0	0	0	829	tags=65%, list=13%, signal=75%
REACTOME_PEPTIDE_CHAIN_ELONGATION	76	-0.59246	-2.25566	0	0.000412624	0.001	1666	tags=59%, list=26%, signal=79%
REACTOME_NONSENSE_MEDIATED_DECAY_ENHANCED_BY_THE_EXON_JUNCTION_COMPLEX	95	-0.560782	-2.2136	0	0.000309468	0.001	1968	tags=63%, list=30%, signal=89%
REACTOME_TRNA_AMINOACYLATION	41	-0.652606	-2.17331	0	0.000743598	0.003	829	tags=41%, list=13%, signal=47%
REACTOME_METABOLISM_OF_MRNA	186	-0.496738	-2.17091	0	0.000619665	0.003	1929	tags=55%, list=30%, signal=76%
MITOTIC_CELL_CYCLE	92	-0.554572	-2.13631	0	0.00140931	0.008	1466	tags=42%, list=23%, signal=54%
REACTOME_3_UTR_MEDIATED_TRANSLATIONAL_REGULATION	96	-0.543579	-2.1356	0	0.00123315	0.008	1666	tags=54%, list=26%, signal=72%
KEGG_RIBOSOME	76	-0.562888	-2.11706	0	0.00135584	0.01	1666	tags=55%, list=26%, signal=74%
STRUCTURAL_CONSTITUENT_OF_RIBOSOME	68	-0.571321	-2.10141	0	0.00193582	0.016	1317	tags=49%, list=20%, signal=60%
KEGG_NOD_LIKE_RECEPTOR_SIGNALING_PATHWAY	26	-0.689108	-2.07524	0	0.00352327	0.032	1177	tags=58%, list=18%, signal=70%
REACTOME_PROTEIN_FOLDING	36	-0.632569	-2.07069	0	0.00342382	0.034	1804	tags=75%, list=28%, signal=103%
KEGG_AMINOACYL_TRNA_BIOSYNTHESIS	39	-0.613745	-2.05762	0	0.00353178	0.038	829	tags=38%, list=13%, signal=44%

## Sheet: S2C.GSEA_Proteins_Down_LeadEdge
	REACTOME_INFLUENZA_VIRAL_RNA_TRANSCRIPTION_AND_REPLICATION	REACTOME_CYTOSOLIC_TRNA_AMINOACYLATION	REACTOME_PEPTIDE_CHAIN_ELONGATION	REACTOME_NONSENSE_MEDIATED_DECAY_ENHANCED_BY_THE_EXON_JUNCTION_COMPLEX	REACTOME_TRNA_AMINOACYLATION	REACTOME_METABOLISM_OF_MRNA	REACTOME_3_UTR_MEDIATED_TRANSLATIONAL_REGULATION	KEGG_RIBOSOME	STRUCTURAL_CONSTITUENT_OF_RIBOSOME	REACTOME_PROTEIN_FOLDING	KEGG_AMINOACYL_TRNA_BIOSYNTHESIS	MITOTIC_CELL_CYCLE	KEGG_NOD_LIKE_RECEPTOR_SIGNALING_PATHWAY
AARS	0	1	0	0	1	0	0	0	0	0	1	0	0
ABL1	0	0	0	0	0	0	0	0	0	0	0	1	0
AIMP1	0	1	0	0	1	0	0	0	0	0	0	0	0
ANAPC10	0	0	0	0	0	0	0	0	0	0	0	1	0
ANAPC4	0	0	0	0	0	0	0	0	0	0	0	1	0
ANAPC5	0	0	0	0	0	0	0	0	0	0	0	1	0
APBB2	0	0	0	0	0	0	0	0	0	0	0	1	0
ASNS	0	0	0	0	0	0	0	0	0	0	0	1	0
CASC3	0	0	0	1	0	1	0	0	0	0	0	0	0
CASP8	0	0	0	0	0	0	0	0	0	0	0	0	1
CCNA2	0	0	0	0	0	0	0	0	0	0	0	1	0
CCT2	0	0	0	0	0	0	0	0	0	1	0	0	0
CCT3	0	0	0	0	0	0	0	0	0	1	0	0	0
CCT4	0	0	0	0	0	0	0	0	0	1	0	0	0
CCT5	0	0	0	0	0	0	0	0	0	1	0	0	0
CCT6A	0	0	0	0	0	0	0	0	0	1	0	0	0
CCT7	0	0	0	0	0	0	0	0	0	1	0	0	0
CCT8	0	0	0	0	0	0	0	0	0	1	0	0	0
CDC123	0	0	0	0	0	0	0	0	0	0	0	1	0
CDC27	0	0	0	0	0	0	0	0	0	0	0	1	0
CDCA5	0	0	0	0	0	0	0	0	0	0	0	1	0
CDK13	0	0	0	0	0	0	0	0	0	0	0	1	0
CDK2	0	0	0	0	0	0	0	0	0	0	0	1	0
CDK4	0	0	0	0	0	0	0	0	0	0	0	1	0
CNOT10	0	0	0	0	0	1	0	0	0	0	0	0	0
CNOT4	0	0	0	0	0	1	0	0	0	0	0	0	0
DARS	0	1	0	0	1	0	0	0	0	0	1	0	0
DARS2	0	0	0	0	1	0	0	0	0	0	1	0	0
DCP1A	0	0	0	0	0	1	0	0	0	0	0	0	0
DCP1B	0	0	0	0	0	1	0	0	0	0	0	0	0
DCPS	0	0	0	0	0	1	0	0	0	0	0	0	0
DDX11	0	0	0	0	0	0	0	0	0	0	0	1	0
DDX6	0	0	0	0	0	1	0	0	0	0	0	0	0
DIS3	0	0	0	0	0	1	0	0	0	0	0	0	0
EEF1A1	0	0	1	0	0	0	0	0	0	0	0	0	0
EEF2	0	0	1	0	0	0	0	0	0	0	0	0	0
EIF1AX	0	0	0	0	0	0	1	0	0	0	0	0	0
EIF2S2	0	0	0	0	0	0	1	0	0	0	0	0	0
EIF2S3	0	0	0	0	0	0	1	0	0	0	0	0	0
EIF3B	0	0	0	0	0	0	1	0	0	0	0	0	0
EIF3I	0	0	0	0	0	0	1	0	0	0	0	0	0
EIF3J	0	0	0	0	0	0	1	0	0	0	0	0	0
EIF4A1	0	0	0	0	0	1	1	0	0	0	0	0	0
EIF4B	0	0	0	0	0	1	0	0	0	0	0	0	0
EIF4H	0	0	0	0	0	0	1	0	0	0	0	0	0
EPRS	0	1	0	0	1	0	0	0	0	0	1	0	0
ETF1	0	0	0	1	0	1	0	0	0	0	0	0	0
EXOSC3	0	0	0	0	0	1	0	0	0	0	0	0	0
EXOSC4	0	0	0	0	0	1	0	0	0	0	0	0	0
EXOSC5	0	0	0	0	0	1	0	0	0	0	0	0	0
EXOSC6	0	0	0	0	0	1	0	0	0	0	0	0	0
EXOSC8	0	0	0	0	0	1	0	0	0	0	0	0	0
EXOSC9	0	0	0	0	0	1	0	0	0	0	0	0	0
FBXO4	0	0	0	0	0	0	0	0	0	1	0	0	0
FBXO6	0	0	0	0	0	0	0	0	0	1	0	0	0
GARS	0	1	0	0	1	0	0	0	0	0	1	0	0
GSPT2	0	0	0	1	0	1	0	0	0	0	0	0	0
GTF2F1	1	0	0	0	0	0	0	0	0	0	0	0	0
GTF2F2	1	0	0	0	0	0	0	0	0	0	0	0	0
HNRNPD	0	0	0	0	0	1	0	0	0	0	0	0	0
HSP90AA1	1	0	0	0	0	0	0	0	0	0	0	0	1
HSP90AB1	0	0	0	0	0	0	0	0	0	0	0	0	1
HSPB1	0	0	0	0	0	1	0	0	0	0	0	0	0
IARS	0	1	0	0	1	0	0	0	0	0	1	0	0
IKBKB	0	0	0	0	0	0	0	0	0	0	0	0	1
IPO5	1	0	0	0	0	0	0	0	0	0	0	0	0
KARS	0	1	0	0	1	0	0	0	0	0	1	0	0
KATNA1	0	0	0	0	0	0	0	0	0	0	0	1	0
KHSRP	0	0	0	0	0	1	0	0	0	0	0	0	0
KIF11	0	0	0	0	0	0	0	0	0	0	0	1	0
KIF13A	0	0	0	0	0	0	0	0	0	1	0	0	0
KIF15	0	0	0	0	0	0	0	0	0	0	0	1	0
KIF22	0	0	0	0	0	0	0	0	0	0	0	1	0
KIF2C	0	0	0	0	0	0	0	0	0	0	0	1	0
KNTC1	0	0	0	0	0	0	0	0	0	0	0	1	0
MAP3K7	0	0	0	0	0	0	0	0	0	0	0	0	1
MAPK1	0	0	0	0	0	0	0	0	0	0	0	0	1
MAPK13	0	0	0	0	0	0	0	0	0	0	0	0	1
MAPK3	0	0	0	0	0	0	0	0	0	0	0	0	1
MARS	0	1	0	0	1	0	0	0	0	0	1	0	0
MRPL12	0	0	0	0	0	0	0	0	1	0	0	0	0
NARS	0	1	0	0	1	0	0	0	0	0	1	0	0
NBN	0	0	0	0	0	0	0	0	0	0	0	1	0
NCAPH	0	0	0	0	0	0	0	0	0	0	0	1	0
NDC80	0	0	0	0	0	0	0	0	0	0	0	1	0
NFKB1	0	0	0	0	0	0	0	0	0	0	0	0	1
PABPC1	0	0	0	1	0	1	1	0	0	0	0	0	0
PAIP1	0	0	0	0	0	1	0	0	0	0	0	0	0
PAM	0	0	0	0	0	0	0	0	0	0	0	1	0
PATL1	0	0	0	0	0	1	0	0	0	0	0	0	0
PFDN1	0	0	0	0	0	0	0	0	0	1	0	0	0
PFDN2	0	0	0	0	0	0	0	0	0	1	0	0	0
PFDN5	0	0	0	0	0	0	0	0	0	1	0	0	0
PFDN6	0	0	0	0	0	0	0	0	0	1	0	0	0
PIN1	0	0	0	0	0	0	0	0	0	0	0	1	0
PLK1	0	0	0	0	0	0	0	0	0	0	0	1	0
POLA1	0	0	0	0	0	0	0	0	0	0	0	1	0
POLD1	0	0	0	0	0	0	0	0	0	0	0	1	0
POLR2B	1	0	0	0	0	0	0	0	0	0	0	0	0
POLR2C	1	0	0	0	0	0	0	0	0	0	0	0	0
POLR2D	1	0	0	0	0	0	0	0	0	0	0	0	0
POLR2E	1	0	0	0	0	0	0	0	0	0	0	0	0
POLR2G	1	0	0	0	0	0	0	0	0	0	0	0	0
POLR2I	1	0	0	0	0	0	0	0	0	0	0	0	0
POLR2J	1	0	0	0	0	0	0	0	0	0	0	0	0
PPA1	0	1	0	0	1	0	0	0	0	0	0	0	0
PPP2R1A	0	0	0	1	0	1	0	0	0	0	0	0	0
PPP2R2A	0	0	0	1	0	1	0	0	0	0	0	0	0
PPP5C	0	0	0	0	0	0	0	0	0	0	0	1	0
PRMT5	0	0	0	0	0	0	0	0	0	0	0	1	0
PSMA1	0	0	0	0	0	1	0	0	0	0	0	0	0
PSMA2	0	0	0	0	0	1	0	0	0	0	0	0	0
PSMA6	0	0	0	0	0	1	0	0	0	0	0	0	0
PSMB1	0	0	0	0	0	1	0	0	0	0	0	0	0
PSMB5	0	0	0	0	0	1	0	0	0	0	0	0	0
PSMB6	0	0	0	0	0	1	0	0	0	0	0	0	0
PSMB7	0	0	0	0	0	1	0	0	0	0	0	0	0
PSMC1	0	0	0	0	0	1	0	0	0	0	0	0	0
PSMC2	0	0	0	0	0	1	0	0	0	0	0	0	0
PSMC3	0	0	0	0	0	1	0	0	0	0	0	0	0
PSMD10	0	0	0	0	0	1	0	0	0	0	0	0	0
PSMD11	0	0	0	0	0	1	0	0	0	0	0	0	0
PSMD12	0	0	0	0	0	1	0	0	0	0	0	0	0
PSMD14	0	0	0	0	0	1	0	0	0	0	0	0	0
PSMD5	0	0	0	0	0	1	0	0	0	0	0	0	0
PSMD6	0	0	0	0	0	1	0	0	0	0	0	0	0
PSMF1	0	0	0	0	0	1	0	0	0	0	0	0	0
QARS	0	1	0	0	1	0	0	0	0	0	1	0	0
RAD17	0	0	0	0	0	0	0	0	0	0	0	1	0
RAN	0	0	0	0	0	0	0	0	0	0	0	1	0
RARS2	0	0	0	0	1	0	0	0	0	0	1	0	0
RELA	0	0	0	0	0	0	0	0	0	0	0	0	1
RIPK2	0	0	0	0	0	0	0	0	0	0	0	0	1
RPL10	1	0	1	1	0	1	1	1	0	0	0	0	0
RPL10A	1	0	1	1	0	1	1	1	0	0	0	0	0
RPL13	1	0	1	1	0	1	1	1	1	0	0	0	0
RPL13A	1	0	1	1	0	1	1	1	1	0	0	0	0
RPL14	1	0	1	1	0	1	1	1	1	0	0	0	0
RPL15	1	0	1	1	0	1	1	1	1	0	0	0	0
RPL18	1	0	1	1	0	1	1	1	1	0	0	0	0
RPL19	0	0	0	1	0	1	0	0	0	0	0	0	0
RPL23A	1	0	1	1	0	1	1	1	1	0	0	0	0
RPL24	1	0	1	1	0	1	1	1	1	0	0	0	0
RPL26	1	0	1	1	0	1	1	1	1	0	0	0	0
RPL26L1	1	0	1	1	0	1	1	1	0	0	0	0	0
RPL27	1	0	1	1	0	1	1	1	1	0	0	0	0
RPL27A	1	0	1	1	0	1	1	1	1	0	0	0	0
RPL28	1	0	1	1	0	1	1	1	1	0	0	0	0
RPL35	1	0	1	1	0	1	1	1	1	0	0	0	0
RPL36	1	0	1	1	0	1	1	1	0	0	0	0	0
RPL36A	1	0	1	1	0	1	1	1	0	0	0	0	0
RPL37	1	0	1	1	0	1	1	1	1	0	0	0	0
RPL37A	1	0	1	1	0	1	1	1	0	0	0	0	0
RPL38	1	0	1	1	0	1	1	1	1	0	0	0	0
RPL4	1	0	1	1	0	1	1	1	1	0	0	0	0
RPL5	1	0	1	1	0	1	1	1	1	0	0	0	0
RPL6	1	0	1	1	0	1	1	1	1	0	0	0	0
RPL7	1	0	1	1	0	1	1	1	1	0	0	0	0
RPL7A	0	0	0	1	0	1	0	0	0	0	0	0	0
RPL8	0	0	0	1	0	0	0	0	0	0	0	0	0
RPL9	1	0	1	1	0	1	1	1	1	0	0	0	0
RPLP0	1	0	1	1	0	1	1	1	1	0	0	0	0
RPS11	1	0	1	1	0	1	1	1	1	0	0	0	0
RPS12	1	0	1	1	0	1	1	1	1	0	0	0	0
RPS13	1	0	1	1	0	1	1	1	1	0	0	0	0
RPS14	1	0	1	1	0	1	1	0	1	0	0	0	0
RPS15	0	0	0	1	0	1	0	0	0	0	0	0	0
RPS16	1	0	1	1	0	1	1	1	1	0	0	0	0
RPS18	1	0	1	1	0	1	1	1	1	0	0	0	0
RPS2	1	0	1	1	0	1	1	1	1	0	0	0	0
RPS20	1	0	1	1	0	1	1	1	1	0	0	0	0
RPS21	1	0	1	1	0	1	1	1	1	0	0	0	0
RPS23	0	0	0	1	0	1	0	0	0	0	0	0	0
RPS26	1	0	1	1	0	1	1	1	1	0	0	0	0
RPS27	1	0	1	1	0	1	1	1	1	0	0	0	0
RPS29	1	0	1	1	0	1	1	1	1	0	0	0	0
RPS3A	1	0	1	1	0	1	1	1	1	0	0	0	0
RPS4X	1	0	1	1	0	1	1	1	1	0	0	0	0
RPS6	1	0	1	1	0	1	1	1	1	0	0	0	0
RPS7	1	0	1	1	0	1	1	1	1	0	0	0	0
RPS8	1	0	1	1	0	1	1	1	1	0	0	0	0
RQCD1	0	0	0	0	0	1	0	0	0	0	0	0	0
SARS	0	1	0	0	1	0	0	0	0	0	1	0	0
SMC4	0	0	0	0	0	0	0	0	0	0	0	1	0
SMG5	0	0	0	1	0	1	0	0	0	0	0	0	0
SMG6	0	0	0	1	0	1	0	0	0	0	0	0	0
SMG7	0	0	0	1	0	1	0	0	0	0	0	0	0
SMG9	0	0	0	1	0	1	0	0	0	0	0	0	0
STMN1	0	0	0	0	0	0	0	0	0	0	0	1	0
SUGT1	0	0	0	0	0	0	0	0	0	0	0	1	1
TAB1	0	0	0	0	0	0	0	0	0	0	0	0	1
TAB2	0	0	0	0	0	0	0	0	0	0	0	0	1
TAF1	0	0	0	0	0	0	0	0	0	0	0	1	0
TARS	0	1	0	0	1	0	0	0	0	0	1	0	0
TBCA	0	0	0	0	0	0	0	0	0	1	0	0	0
TBCB	0	0	0	0	0	0	0	0	0	1	0	0	0
TBCC	0	0	0	0	0	0	0	0	0	1	0	0	0
TBCD	0	0	0	0	0	0	0	0	0	1	0	0	0
TBCE	0	0	0	0	0	0	0	0	0	1	0	0	0
TCP1	0	0	0	0	0	0	0	0	0	1	0	0	0
TNKS1BP1	0	0	0	0	0	1	0	0	0	0	0	0	0
TNPO1	0	0	0	0	0	1	0	0	0	0	0	0	0
TPD52L1	0	0	0	0	0	0	0	0	0	0	0	1	0
TTK	0	0	0	0	0	0	0	0	0	0	0	1	0
TUBA1C	0	0	0	0	0	0	0	0	0	1	0	0	0
TUBA4A	0	0	0	0	0	0	0	0	0	1	0	0	0
TUBB2B	0	0	0	0	0	0	0	0	0	1	0	0	0
TUBB3	0	0	0	0	0	0	0	0	0	1	0	0	0
TUBB6	0	0	0	0	0	0	0	0	0	1	0	0	0
UPF2	0	0	0	1	0	1	0	0	0	0	0	0	0
UPF3B	0	0	0	1	0	1	0	0	0	0	0	0	0
VARS	0	1	0	0	1	0	0	0	0	0	1	0	0
VBP1	0	0	0	0	0	0	0	0	0	1	0	0	0
XIAP	0	0	0	0	0	0	0	0	0	0	0	0	1
XPO1	0	0	0	0	0	1	0	0	0	0	0	0	0
XRN2	0	0	0	0	0	0	0	0	0	1	0	0	0
YARS	0	1	0	0	1	0	0	0	0	0	1	0	0
YWHAB	0	0	0	0	0	1	0	0	0	0	0	0	0
ZFP36L1	0	0	0	0	0	1	0	0	0	0	0	0	0
ZW10	0	0	0	0	0	0	0	0	0	0	0	1	0

## Sheet: S2D.GSEA_Proteins_Up
NAME	SIZE	ES	NES	NOM p-val	FDR q-val	FWER p-val	RANK AT MAX	LEADING EDGE
ENDOPLASMIC_RETICULUM	165	0.569434	2.46371	0	0	0	1459	tags=58%, list=23%, signal=72%
REACTOME_CHOLESTEROL_BIOSYNTHESIS	16	0.899609	2.45806	0	0	0	220	tags=69%, list=3%, signal=71%
INTRINSIC_TO_MEMBRANE	293	0.519866	2.39387	0	0	0	1356	tags=41%, list=21%, signal=49%
INTEGRAL_TO_MEMBRANE	291	0.514004	2.36513	0	0	0	1356	tags=40%, list=21%, signal=49%
KEGG_LYSOSOME	78	0.617605	2.33039	0	0	0	910	tags=37%, list=14%, signal=43%
REACTOME_METABOLISM_OF_LIPIDS_AND_LIPOPROTEINS	244	0.506593	2.28897	0	0	0	1016	tags=33%, list=16%, signal=37%
KEGG_SNARE_INTERACTIONS_IN_VESICULAR_TRANSPORT	27	0.748152	2.28497	0	0	0	1008	tags=63%, list=16%, signal=74%
MEMBRANE_PART	469	0.47371	2.27553	0	0	0	1356	tags=37%, list=21%, signal=44%
REACTOME_INTERFERON_ALPHA_BETA_SIGNALING	24	0.750618	2.24904	0	0.000173216	0.002	1345	tags=79%, list=21%, signal=100%
ER_GOLGI_INTERMEDIATE_COMPARTMENT	20	0.790915	2.24901	0	0.000155894	0.002	1042	tags=85%, list=16%, signal=101%
NUCLEAR_ENVELOPE_ENDOPLASMIC_RETICULUM_NETWORK	55	0.632982	2.24618	0	0.000141722	0.002	1002	tags=51%, list=15%, signal=60%
ENDOPLASMIC_RETICULUM_MEMBRANE	48	0.647696	2.21361	0	0.000256032	0.004	1107	tags=52%, list=17%, signal=62%
CELLULAR_LIPID_METABOLIC_PROCESS	101	0.554685	2.20957	0	0.00029449	0.005	1451	tags=48%, list=22%, signal=60%
LIPID_METABOLIC_PROCESS	128	0.526753	2.17994	0	0.000441301	0.008	1451	tags=44%, list=22%, signal=55%
INTEGRAL_TO_PLASMA_MEMBRANE	158	0.512249	2.17614	0	0.000411881	0.008	1356	tags=38%, list=21%, signal=47%
INTRINSIC_TO_PLASMA_MEMBRANE	158	0.512249	2.16244	0	0.000486781	0.01	1356	tags=38%, list=21%, signal=47%
GOLGI_APPARATUS	131	0.520815	2.16165	0	0.000458147	0.01	1010	tags=35%, list=16%, signal=41%
ENDOPLASMIC_RETICULUM_PART	57	0.593078	2.1376	0	0.000654115	0.015	1120	tags=51%, list=17%, signal=61%
REACTOME_TRANSPORT_OF_GLUCOSE_AND_OTHER_SUGARS_BILE_SALTS_AND_ORGANIC_ACIDS_METAL_IONS_AND_AMINE_COMPOUNDS	18	0.758471	2.12734	0	0.000659732	0.016	785	tags=50%, list=12%, signal=57%
REACTOME_PHOSPHOLIPID_METABOLISM	104	0.519559	2.10312	0	0.000941371	0.024	1672	tags=50%, list=26%, signal=66%
EXTRACELLULAR_REGION	59	0.580502	2.10074	0	0.000933067	0.025	1071	tags=41%, list=17%, signal=48%
GOLGI_VESICLE_TRANSPORT	42	0.624477	2.09918	0	0.000925238	0.026	1094	tags=57%, list=17%, signal=68%
PRIMARY_ACTIVE_TRANSMEMBRANE_TRANSPORTER_ACTIVITY	23	0.68365	2.084	0	0.00102345	0.03	730	tags=39%, list=11%, signal=44%

## Sheet: S2E.GSEA_ProteinsUp_LeadEdge
	ENDOPLASMIC_RETICULUM	INTRINSIC_TO_MEMBRANE	INTEGRAL_TO_MEMBRANE	KEGG_LYSOSOME	KEGG_SNARE_INTERACTIONS_IN_VESICULAR_TRANSPORT	MEMBRANE_PART	ER_GOLGI_INTERMEDIATE_COMPARTMENT	NUCLEAR_ENVELOPE_ENDOPLASMIC_RETICULUM_NETWORK	ENDOPLASMIC_RETICULUM_MEMBRANE	INTEGRAL_TO_PLASMA_MEMBRANE	INTRINSIC_TO_PLASMA_MEMBRANE	GOLGI_APPARATUS	ENDOPLASMIC_RETICULUM_PART	EXTRACELLULAR_REGION	GOLGI_VESICLE_TRANSPORT	PRIMARY_ACTIVE_TRANSMEMBRANE_TRANSPORTER_ACTIVITY	REACTOME_CHOLESTEROL_BIOSYNTHESIS	REACTOME_METABOLISM_OF_LIPIDS_AND_LIPOPROTEINS	CELLULAR_LIPID_METABOLIC_PROCESS	LIPID_METABOLIC_PROCESS	REACTOME_PHOSPHOLIPID_METABOLISM	REACTOME_INTERFERON_ALPHA_BETA_SIGNALING	REACTOME_TRANSPORT_OF_GLUCOSE_AND_OTHER_SUGARS_BILE_SALTS_AND_ORGANIC_ACIDS_METAL_IONS_AND_AMINE_COMPOUNDS
ABCA3	0	1	1	0	0	1	0	0	0	0	0	0	0	0	0	1	0	0	0	0	0	0	0
ABCB8	0	0	0	0	0	1	0	0	0	0	0	0	0	0	0	0	0	0	0	0	0	0	0
ABCC5	0	1	1	0	0	1	0	0	0	1	1	0	0	0	0	0	0	0	0	0	0	0	0
ABCD1	0	0	0	0	0	0	0	0	0	0	0	0	0	0	0	0	0	1	0	0	0	0	0
ABCD3	0	1	1	0	0	1	0	0	0	0	0	0	0	0	0	0	0	0	0	0	0	0	0
ACAA1	0	0	0	0	0	0	0	0	0	0	0	0	0	0	0	0	0	1	0	0	0	0	0
ACADM	0	0	0	0	0	0	0	0	0	0	0	0	0	0	0	0	0	1	1	1	0	0	0
ACADS	0	0	0	0	0	0	0	0	0	0	0	0	0	0	0	0	0	0	1	1	0	0	0
ACAT1	0	0	0	0	0	0	0	0	0	0	0	0	0	0	0	0	0	1	0	0	0	0	0
ACOT8	0	0	0	0	0	0	0	0	0	0	0	0	0	0	0	0	0	1	0	1	0	0	0
ACOT9	0	0	0	0	0	0	0	0	0	0	0	0	0	0	0	0	0	0	1	1	0	0	0
ACP2	0	1	1	1	0	1	0	0	0	0	0	0	0	0	0	0	0	0	0	0	0	0	0
ACSL1	0	0	0	0	0	0	0	0	0	0	0	0	0	0	0	0	0	1	0	0	0	0	0
ADAM10	0	0	0	0	0	0	0	0	0	0	0	1	0	0	0	0	0	0	0	0	0	0	0
ADAR	0	0	0	0	0	0	0	0	0	0	0	0	0	0	0	0	0	0	0	0	0	1	0
ADCY9	0	1	1	0	0	1	0	0	0	1	1	0	0	0	0	0	0	0	0	0	0	0	0
AGPAT1	1	0	0	0	0	0	0	0	0	0	0	0	0	0	0	0	0	0	1	1	1	0	0
AGPAT3	1	0	0	0	0	0	0	0	0	0	0	0	0	0	0	0	0	1	0	0	1	0	0
AGPAT6	1	0	0	0	0	0	0	0	0	0	0	0	0	0	0	0	0	1	1	1	1	0	0
AGPAT9	0	0	0	0	0	0	0	0	0	0	0	0	0	0	0	0	0	1	0	0	1	0	0
AGRN	0	0	0	0	0	0	0	0	0	0	0	0	0	1	0	0	0	0	0	0	0	0	0
AIFM2	0	0	0	0	0	1	0	0	0	0	0	0	0	0	0	0	0	0	0	0	0	0	0
AKR1C2	0	0	0	0	0	0	0	0	0	0	0	0	0	0	0	0	0	0	1	1	0	0	0
AKR1C3	0	0	0	0	0	0	0	0	0	0	0	0	0	0	0	0	0	0	1	1	0	0	0
ALDH3A2	0	0	0	0	0	0	0	0	0	0	0	0	0	0	0	0	0	0	0	1	0	0	0
ALDH5A1	0	0	0	0	0	0	0	0	0	0	0	0	0	0	0	0	0	0	1	1	0	0	0
AP1M1	0	0	0	1	0	0	0	0	0	0	0	0	0	0	0	0	0	0	0	0	0	0	0
APOB	0	0	0	0	0	0	0	0	0	0	0	0	0	0	0	0	0	1	0	0	0	0	0
APOD	0	0	0	0	0	0	0	0	0	0	0	0	0	1	0	0	0	0	0	1	0	0	0
APOL2	0	0	0	0	0	0	0	0	0	0	0	0	0	0	0	0	0	0	1	1	0	0	0
ARF3	0	0	0	0	0	0	0	0	0	0	0	0	0	0	0	0	0	1	0	0	1	0	0
ARL1	0	0	0	0	0	0	0	0	0	0	0	1	0	0	0	0	0	0	0	0	0	0	0
ARSB	0	0	0	0	0	0	0	0	0	0	0	0	0	0	0	0	0	0	0	0	1	0	0
ATP11B	0	0	0	0	0	0	0	0	0	0	0	0	0	0	0	1	0	0	0	0	0	0	0
ATP2A2	0	1	1	0	0	1	0	0	0	1	1	0	0	0	0	1	0	0	0	0	0	0	0
ATP2A3	0	0	0	0	0	0	0	0	0	0	0	0	0	0	0	1	0	0	0	0	0	0	0
ATP5C1	0	0	0	0	0	1	0	0	0	0	0	0	0	0	0	0	0	0	0	0	0	0	0
ATP5E	0	0	0	0	0	1	0	0	0	0	0	0	0	0	0	0	0	0	0	0	0	0	0
ATP6AP1	0	0	0	1	0	1	0	0	0	0	0	0	0	0	0	0	0	0	0	0	0	0	0
ATP6AP2	0	0	0	0	0	1	0	0	0	0	0	0	0	0	0	0	0	0	0	0	0	0	0
ATP6V0A1	0	0	0	1	0	0	0	0	0	0	0	0	0	0	0	0	0	0	0	0	0	0	0
ATP6V0C	0	1	1	1	0	1	0	0	0	0	0	0	0	0	0	1	0	0	0	0	0	0	0
ATP6V1H	0	0	0	1	0	0	0	0	0	0	0	0	0	0	0	0	0	0	0	0	0	0	0
ATP7A	0	1	1	0	0	1	0	0	0	1	1	1	0	0	0	1	0	0	0	0	0	0	0
ATP8B1	0	0	0	0	0	1	0	0	0	0	0	0	0	0	0	1	0	0	0	0	0	0	0
ATRN	0	1	1	0	0	1	0	0	0	1	1	0	0	1	0	0	0	0	0	0	0	0	0
B4GALT4	0	1	1	0	0	1	0	0	0	0	0	0	0	0	0	0	0	0	1	1	0	0	0
BCAP31	0	1	1	0	0	1	0	0	0	1	1	0	0	0	0	0	0	0	0	0	0	0	0
BCL2L13	0	1	1	0	0	1	0	0	0	0	0	0	0	0	0	0	0	0	0	0	0	0	0
BDH1	0	0	0	0	0	0	0	0	0	0	0	0	0	0	0	0	0	1	0	0	0	0	0
BDH2	0	0	0	0	0	0	0	0	0	0	0	0	0	0	0	0	0	0	1	1	0	0	0
BET1	0	0	0	0	1	1	0	0	0	0	0	1	0	0	1	0	0	0	0	0	0	0	0
BNIP1	1	1	1	0	1	1	0	1	1	0	0	0	1	0	0	0	0	0	0	0	0	0	0
BNIP3L	1	0	0	0	0	0	0	0	0	0	0	0	0	0	0	0	0	0	0	0	0	0	0
CALR	1	0	0	0	0	0	0	0	0	0	0	0	1	0	0	0	0	0	0	0	0	0	0
CALU	1	0	0	0	0	0	0	0	0	0	0	1	0	0	0	0	0	0	0	0	0	0	0
CAMLG	1	0	0	0	0	0	0	0	0	0	0	0	0	0	0	0	0	0	0	0	0	0	0
CASP7	1	0	0	0	0	1	0	1	1	0	0	0	1	0	0	0	0	0	0	0	0	0	0
CD151	0	1	1	0	0	1	0	0	0	1	1	0	0	0	0	0	0	0	0	0	0	0	0
CD47	0	1	1	0	0	1	0	0	0	1	1	0	0	0	0	0	0	0	0	0	0	0	0
CD55	0	1	1	0	0	1	0	0	0	1	1	0	0	0	0	0	0	0	0	0	0	0	0
CD63	0	1	1	1	0	1	0	0	0	1	1	0	0	0	0	0	0	0	0	0	0	0	0
CDIPT	0	0	0	0	0	0	0	0	0	0	0	0	0	0	0	0	0	1	0	0	1	0	0
CDS2	0	0	0	0	0	0	0	0	0	0	0	0	0	0	0	0	0	1	0	0	1	0	0
CERS2	0	0	0	0	0	0	0	0	0	0	0	0	0	0	0	0	0	0	0	0	1	0	0
CERS5	0	0	0	0	0	0	0	0	0	0	0	0	0	0	0	0	0	1	1	1	1	0	0
CIB1	1	0	0	0	0	0	0	0	0	0	0	0	0	0	0	0	0	0	0	0	0	0	0
CLGN	1	0	0	0	0	0	0	0	0	0	0	0	0	0	0	0	0	0	0	0	0	0	0
CLN8	1	0	0	0	0	0	0	0	0	0	0	0	0	0	0	0	0	0	1	1	0	0	0
CLPTM1	0	1	1	0	0	1	0	0	0	1	1	0	0	0	0	0	0	0	0	0	0	0	0
CLTB	0	0	0	1	0	0	0	0	0	0	0	0	0	0	0	0	0	0	0	0	0	0	0
CLTC	0	0	0	1	0	0	0	0	0	0	0	0	0	0	0	0	0	0	0	0	0	0	0
CNIH4	1	0	0	0	0	0	0	0	0	0	0	0	0	0	0	0	0	0	0	0	0	0	0
COG1	0	0	0	0	0	0	0	0	0	0	0	1	0	0	0	0	0	0	0	0	0	0	0
COG2	0	0	0	0	0	1	0	0	0	0	0	1	0	0	1	0	0	0	0	0	0	0	0
COG3	0	0	0	0	0	0	0	0	0	0	0	1	0	0	1	0	0	0	0	0	0	0	0
COG4	0	0	0	0	0	0	0	0	0	0	0	1	0	0	0	0	0	0	0	0	0	0	0
COG5	0	0	0	0	0	0	0	0	0	0	0	1	0	0	0	0	0	0	0	0	0	0	0
COG7	0	0	0	0	0	0	0	0	0	0	0	1	0	0	1	0	0	0	0	0	0	0	0
COG8	0	0	0	0	0	0	0	0	0	0	0	1	0	0	0	0	0	0	0	0	0	0	0
COL18A1	0	0	0	0	0	0	0	0	0	0	0	0	0	1	0	0	0	0	0	0	0	0	0
COPA	0	0	0	0	0	1	0	0	0	0	0	1	0	1	0	0	0	0	0	0	0	0	0
COPB2	0	0	0	0	0	1	0	0	0	0	0	1	0	0	1	0	0	0	0	0	0	0	0
CRAT	0	0	0	0	0	0	0	0	0	0	0	0	0	0	0	0	0	1	0	0	0	0	0
CTSA	1	0	0	1	0	0	0	0	0	0	0	0	0	0	0	0	0	1	0	0	1	0	0
CTSC	0	0	0	1	0	0	0	0	0	0	0	0	0	0	0	0	0	0	0	0	0	0	0
CTSD	0	0	0	1	0	0	0	0	0	0	0	0	0	0	0	0	0	0	0	0	0	0	0
CYP51A1	0	0	0	0	0	0	0	0	0	0	0	0	0	0	0	0	1	1	0	0	0	0	0
DAD1	1	0	0	0	0	1	0	0	1	0	0	0	1	0	0	0	0	0	0	0	0	0	0
DCBLD2	0	1	1	0	0	1	0	0	0	1	1	0	0	0	0	0	0	0	0	0	0	0	0
DDOST	1	0	0	0	0	1	0	1	1	0	0	0	1	0	0	0	0	0	0	0	0	0	0
DDR1	0	1	1	0	0	1	0	0	0	1	1	0	0	0	0	0	0	0	0	0	0	0	0
DERL1	1	1	1	0	0	1	0	1	1	0	0	0	1	0	0	0	0	0	0	0	0	0	0
DHCR24	1	0	0	0	0	0	0	0	0	0	0	0	0	0	0	0	1	1	1	1	0	0	0
DHCR7	1	0	0	0	0	1	0	1	0	0	0	0	0	0	0	0	1	1	1	1	0	0	0
DHRS1	1	0	0	0	0	0	0	0	0	0	0	0	0	0	0	0	0	0	0	0	0	0	0
DHRS3	0	0	0	0	0	0	0	0	0	0	0	0	0	0	0	0	0	0	1	1	0	0	0
DNAJB9	1	0	0	0	0	0	0	0	0	0	0	0	0	0	0	0	0	0	0	0	0	0	0
DNAJC1	1	0	0	0	0	0	0	0	0	0	0	0	0	0	0	0	0	0	0	0	0	0	0
DNM1L	1	0	0	0	0	0	0	0	0	0	0	0	0	0	0	0	0	0	0	0	0	0	0
DOPEY2	0	0	0	0	0	1	0	0	0	0	0	1	0	0	1	0	0	0	0	0	0	0	0
ECHS1	0	0	0	0	0	0	0	0	0	0	0	0	0	0	0	0	0	0	1	1	0	0	0
ECI2	0	0	0	0	0	0	0	0	0	0	0	0	0	0	0	0	0	0	1	1	0	0	0
EEA1	0	0	0	0	0	1	0	0	0	0	0	0	0	0	0	0	0	0	0	0	0	0	0
EIF2AK3	1	0	0	0	0	0	0	0	0	0	0	0	0	0	0	0	0	0	0	0	0	0	0
ELOVL6	0	0	0	0	0	0	0	0	0	0	0	0	0	0	0	0	0	1	0	0	0	0	0
EPHB3	0	1	1	0	0	1	0	0	0	1	1	0	0	0	0	0	0	0	0	0	0	0	0
ERAP1	1	0	0	0	0	0	0	0	0	0	0	0	0	0	0	0	0	0	0	0	0	0	0
ERGIC2	0	0	0	0	0	0	1	0	0	0	0	0	0	0	1	0	0	0	0	0	0	0	0
ERGIC3	0	0	0	0	0	0	1	0	0	0	0	0	0	0	1	0	0	0	0	0	0	0	0
ERN1	1	1	1	0	0	1	0	1	1	0	0	0	1	0	0	0	0	0	0	0	0	0	0
ERO1L	1	0	0	0	0	0	0	0	0	0	0	0	0	0	0	0	0	0	0	0	0	0	0
ERP29	1	0	0	0	0	0	0	0	0	0	0	0	0	0	0	0	0	0	0	0	0	0	0
ERP44	1	0	0	0	0	1	1	1	1	0	0	0	1	0	0	0	0	0	0	0	0	0	0
FASN	0	0	0	0	0	0	0	0	0	0	0	0	0	0	0	0	0	1	0	0	0	0	0
FDFT1	0	1	1	0	0	1	0	0	0	0	0	0	0	0	0	0	1	1	0	0	0	0	0
FDPS	0	0	0	0	0	0	0	0	0	0	0	0	0	0	0	0	0	0	1	1	0	0	0
FDXR	0	0	0	0	0	0	0	0	0	0	0	0	0	0	0	0	0	0	1	1	0	0	0
FUCA1	0	0	0	1	0	0	0	0	0	0	0	0	0	0	0	0	0	0	0	0	0	0	0
GALNT3	0	1	1	0	0	1	0	0	0	0	0	0	0	0	0	0	0	0	0	0	0	0	0
GBA	0	0	0	0	0	0	0	0	0	0	0	0	0	0	0	0	0	0	0	0	1	0	0
GBA2	1	1	1	0	0	1	0	0	0	0	0	0	0	0	0	0	0	0	1	1	1	0	0
GBAS	0	1	1	0	0	1	0	0	0	1	1	0	0	0	0	0	0	0	0	0	0	0	0
GBF1	0	0	0	0	0	0	0	0	0	0	0	1	0	0	1	0	0	0	0	0	0	0	0
GBP2	0	0	0	0	0	0	0	0	0	0	0	0	0	0	0	0	0	0	0	0	0	1	0
GDF15	0	0	0	0	0	0	0	0	0	0	0	0	0	1	0	0	0	0	0	0	0	0	0
GLA	0	0	0	1	0	0	0	0	0	0	0	1	0	1	0	0	0	1	1	1	1	0	0
GLB1	0	0	0	1	0	0	0	0	0	0	0	0	0	0	0	0	0	1	0	0	1	0	0
GLCE	0	0	0	0	0	0	0	0	0	0	0	1	0	0	0	0	0	0	0	0	0	0	0
GLE1	0	1	1	0	0	1	0	0	0	0	0	0	0	0	0	0	0	0	0	0	0	0	0
GLG1	0	0	0	0	0	1	0	0	0	0	0	1	0	0	0	0	0	0	0	0	0	0	0
GM2A	0	0	0	1	0	0	0	0	0	0	0	0	0	0	0	0	0	1	0	0	1	0	0
GNS	0	0	0	1	0	0	0	0	0	0	0	0	0	0	0	0	0	0	0	0	0	0	0
GOLGA3	0	0	0	0	0	1	0	0	0	0	0	1	0	0	0	0	0	0	0	0	0	0	0
GOLGA5	0	1	1	0	0	1	0	0	0	0	0	1	0	0	1	0	0	0	0	0	0	0	0
GOLGB1	0	1	1	0	0	1	1	0	0	0	0	1	0	0	0	0	0	0	0	0	0	0	0
GOSR1	0	0	0	0	1	1	0	0	0	0	0	1	0	0	1	0	0	0	0	0	0	0	0
GPAA1	1	1	1	0	0	1	0	1	1	0	0	0	1	0	0	0	0	0	1	1	0	0	0
GPC1	0	1	1	0	0	1	0	0	0	1	1	0	0	1	0	0	0	0	0	0	0	0	0
GPC4	0	1	1	0	0	1	0	0	0	1	1	0	0	0	0	0	0	0	0	0	0	0	0
GUSB	0	0	0	1	0	0	0	0	0	0	0	0	0	0	0	0	0	0	0	0	0	0	0
HACL1	0	0	0	0	0	0	0	0	0	0	0	0	0	0	0	0	0	1	1	1	0	0	0
HADHA	0	0	0	0	0	0	0	0	0	0	0	0	0	0	0	0	0	1	0	0	1	0	0
HADHB	0	0	0	0	0	0	0	0	0	0	0	0	0	0	0	0	0	0	0	0	1	0	0
HERC1	0	0	0	0	0	0	0	0	0	0	0	1	0	0	0	0	0	0	0	0	0	0	0
HEXA	0	0	0	1	0	0	0	0	0	0	0	0	0	0	0	0	0	1	0	0	1	0	0
HEXB	0	0	0	0	0	0	0	0	0	0	0	0	0	0	0	0	0	0	0	0	1	0	0
HMGCL	0	0	0	0	0	0	0	0	0	0	0	0	0	0	0	0	0	1	0	0	0	0	0
HMGCS1	0	0	0	0	0	0	0	0	0	0	0	0	0	0	0	0	1	1	0	0	0	0	0
HMOX1	1	0	0	0	0	0	0	0	0	0	0	0	0	0	0	0	0	0	0	0	0	0	0
HSD17B12	0	0	0	0	0	0	0	0	0	0	0	0	0	0	0	0	0	1	0	0	0	0	0
HSD17B4	0	0	0	0	0	0	0	0	0	0	0	0	0	0	0	0	0	1	0	0	0	0	0
HSD17B7	0	0	0	0	0	0	0	0	0	0	0	0	0	0	0	0	1	1	0	0	0	0	0
HSP90B1	1	0	0	0	0	1	0	1	1	0	0	0	1	0	0	0	0	0	0	0	0	0	0
HSPG2	0	0	0	0	0	0	0	0	0	0	0	0	0	0	0	0	0	1	0	0	0	0	0
HYOU1	1	0	0	0	0	0	0	0	0	0	0	0	0	0	0	0	0	0	0	0	0	0	0
ICAM1	0	1	1	0	0	1	0	0	0	1	1	0	0	0	0	0	0	0	0	0	0	0	0
IDI1	0	0	0	0	0	0	0	0	0	0	0	0	0	0	0	0	1	1	1	1	0	0	0
IFI30	0	0	0	0	0	0	0	0	0	0	0	0	0	1	0	0	0	0	0	0	0	0	0
IFI6	0	0	0	0	0	0	0	0	0	0	0	0	0	0	0	0	0	0	0	0	0	1	0
IFIT1	0	0	0	0	0	0	0	0	0	0	0	0	0	0	0	0	0	0	0	0	0	1	0
IFIT3	0	0	0	0	0	0	0	0	0	0	0	0	0	0	0	0	0	0	0	0	0	1	0
IFITM3	0	0	0	0	0	0	0	0	0	0	0	0	0	0	0	0	0	0	0	0	0	1	0
IK	0	0	0	0	0	0	0	0	0	0	0	0	0	1	0	0	0	0	0	0	0	0	0
IL10RB	0	1	1	0	0	1	0	0	0	0	0	0	0	0	0	0	0	0	0	0	0	0	0
INPP5K	0	0	0	0	0	0	0	0	0	0	0	0	0	0	0	0	0	1	0	0	1	0	0
INSR	0	1	1	0	0	1	0	0	0	1	1	0	0	0	0	0	0	0	0	0	0	0	0
IRF9	0	0	0	0	0	0	0	0	0	0	0	0	0	0	0	0	0	0	0	0	0	1	0
ISG15	0	0	0	0	0	0	0	0	0	0	0	0	0	0	0	0	0	0	0	0	0	1	0
ISG20	0	0	0	0	0	0	0	0	0	0	0	0	0	0	0	0	0	0	0	0	0	1	0
ITGA5	0	1	1	0	0	1	0	0	0	1	1	0	0	0	0	0	0	0	0	0	0	0	0
ITGB1	1	0	0	0	0	0	0	0	0	0	0	0	0	0	0	0	0	0	0	0	0	0	0
ITPR1	0	1	1	0	0	1	0	0	0	1	1	0	0	0	0	0	0	0	0	0	0	0	0
ITPR3	1	0	0	0	0	0	0	0	0	0	0	0	0	0	0	0	0	0	0	0	0	0	0
JAK1	0	0	0	0	0	0	0	0	0	0	0	0	0	0	0	0	0	0	0	0	0	1	0
KDELR1	0	1	1	0	0	1	1	0	0	0	0	0	0	0	0	0	0	0	0	0	0	0	0
KDSR	0	0	0	0	0	0	0	0	0	0	0	0	0	1	0	0	0	1	0	0	1	0	0
LAMB1	0	0	0	0	0	1	0	0	0	0	0	0	0	1	0	0	0	0	0	0	0	0	0
LAMC1	0	0	0	0	0	0	0	0	0	0	0	0	0	1	0	0	0	0	0	0	0	0	0
LAMP1	0	1	1	1	0	1	0	0	0	1	1	0	0	0	0	0	0	0	0	0	0	0	0
LAMP2	0	0	0	1	0	1	0	0	0	0	0	0	0	0	0	0	0	0	0	0	0	0	0
LDLR	0	1	1	0	0	1	0	0	0	1	1	0	0	0	0	0	0	1	0	1	0	0	0
LETM1	0	1	1	0	0	1	0	0	0	1	1	0	0	0	0	0	0	0	0	0	0	0	0
LGALS3BP	0	0	0	0	0	0	0	0	0	0	0	0	0	1	0	0	0	0	0	0	0	0	0
LIMA1	0	0	0	0	0	1	0	0	0	0	0	0	0	0	0	0	0	0	0	0	0	0	0
LIPA	0	0	0	1	0	0	0	0	0	0	0	0	0	0	0	0	0	0	0	0	0	0	0
LMAN1	1	1	1	0	0	1	0	1	1	0	0	1	1	0	1	0	0	0	0	0	0	0	0
LMAN2L	1	0	0	0	0	0	0	0	0	0	0	0	0	0	0	0	0	0	0	0	0	0	0
LPCAT1	1	0	0	0	0	0	0	0	0	0	0	1	0	0	0	0	0	1	1	1	1	0	0
LPCAT3	0	0	0	0	0	0	0	0	0	0	0	0	0	0	0	0	0	1	0	0	1	0	0
LPGAT1	0	0	0	0	0	0	0	0	0	0	0	0	0	0	0	0	0	1	0	0	1	0	0
LPIN2	0	0	0	0	0	0	0	0	0	0	0	0	0	0	0	0	0	0	0	0	1	0	0
LRPAP1	0	1	1	0	0	1	0	0	0	0	0	0	0	0	0	0	0	0	0	0	0	0	0
LSS	0	0	0	0	0	0	0	0	0	0	0	0	0	0	0	0	1	1	0	0	0	0	0
M6PR	0	1	1	1	0	1	0	0	0	1	1	0	0	0	0	0	0	0	0	0	0	0	0
MAGT1	1	0	0	0	0	1	0	1	1	0	0	0	1	0	0	0	0	0	0	0	0	0	0
MAN1A2	0	1	1	0	0	1	0	0	0	0	0	0	0	0	0	0	0	0	0	0	0	0	0
MBOAT1	0	0	0	0	0	0	0	0	0	0	0	0	0	0	0	0	0	1	0	0	1	0	0
MBOAT7	0	0	0	0	0	0	0	0	0	0	0	0	0	0	0	0	0	0	0	0	1	0	0
MCL1	0	0	0	0	0	1	0	0	0	0	0	0	0	0	0	0	0	0	0	0	0	0	0
MED12	0	0	0	0	0	0	0	0	0	0	0	0	0	0	0	0	0	1	0	0	0	0	0
MED14	0	0	0	0	0	0	0	0	0	0	0	0	0	0	0	0	0	1	0	0	0	0	0
MED16	0	0	0	0	0	0	0	0	0	0	0	0	0	0	0	0	0	1	0	0	0	0	0
MED27	0	0	0	0	0	0	0	0	0	0	0	0	0	0	0	0	0	1	0	0	0	0	0
MED4	0	0	0	0	0	0	0	0	0	0	0	0	0	0	0	0	0	1	0	0	0	0	0
MFN2	0	1	0	0	0	1	0	0	0	0	0	0	0	0	0	0	0	0	0	0	0	0	0
MGAT1	0	1	1	0	0	1	0	0	0	0	0	0	0	0	0	0	0	0	0	0	0	0	0
MINPP1	1	0	0	0	0	0	0	0	0	0	0	0	0	0	0	0	0	0	0	0	0	0	0
MOGS	1	0	0	0	0	0	0	0	0	0	0	0	0	0	0	0	0	0	0	0	0	0	0
MON2	0	0	0	0	0	0	0	0	0	0	0	0	0	0	1	0	0	0	0	0	0	0	0
MTMR3	0	0	0	0	0	0	0	0	0	0	0	0	0	0	0	0	0	0	0	0	1	0	0
MTX1	0	1	1	0	0	1	0	0	0	0	0	0	0	0	0	0	0	0	0	0	0	0	0
MTX2	0	0	0	0	0	1	0	0	0	0	0	0	0	0	0	0	0	0	0	0	0	0	0
NBEA	0	0	0	0	0	0	0	0	0	0	0	1	0	0	0	0	0	0	0	0	0	0	0
NCSTN	1	1	1	0	0	1	0	0	0	1	1	0	0	0	0	0	0	0	0	0	0	0	0
NECAP2	0	0	0	0	0	1	0	0	0	0	0	0	0	0	0	0	0	0	0	0	0	0	0
NFYB	0	0	0	0	0	0	0	0	0	0	0	0	0	0	0	0	0	1	0	0	0	0	0
NOTCH2	0	1	1	0	0	1	0	0	0	1	1	0	0	0	0	0	0	0	0	0	0	0	0
NPC1	1	1	1	1	0	1	0	0	0	1	1	0	0	0	0	0	0	0	1	1	0	0	0
NPC2	0	0	0	1	0	0	0	0	0	0	0	0	0	0	0	0	0	0	1	1	0	0	0
NPLOC4	1	0	0	0	0	1	0	1	0	0	0	0	0	0	0	0	0	0	0	0	0	0	0
NR2F2	0	0	0	0	0	0	0	0	0	0	0	0	0	0	0	0	0	0	0	1	0	0	0
NRBP1	0	0	0	0	0	0	0	0	0	0	0	0	0	0	1	0	0	0	0	0	0	0	0
NSDHL	1	0	0	0	0	0	0	0	0	0	0	0	0	0	0	0	1	1	1	1	0	0	0
NUCB1	0	0	0	0	0	0	1	0	0	0	0	0	0	1	0	0	0	0	0	0	0	0	0
NUCB2	0	0	0	0	0	0	1	0	0	0	0	0	0	1	0	0	0	0	0	0	0	0	0
OAS1	0	0	0	0	0	0	0	0	0	0	0	0	0	0	0	0	0	0	0	0	0	1	0
OAS2	0	0	0	0	0	0	0	0	0	0	0	0	0	0	0	0	0	0	0	0	0	1	0
OAS3	0	0	0	0	0	0	0	0	0	0	0	0	0	0	0	0	0	0	0	0	0	1	0
OASL	0	0	0	0	0	0	0	0	0	0	0	0	0	0	0	0	0	0	0	0	0	1	0
OPTN	0	0	0	0	0	0	0	0	0	0	0	1	0	0	1	0	0	0	0	0	0	0	0
OSBP	0	0	0	0	0	0	0	0	0	0	0	0	0	0	0	0	0	1	0	0	1	0	0
OSTC	1	0	0	0	0	1	0	1	1	0	0	0	1	0	0	0	0	0	0	0	0	0	0
OXSM	0	0	0	0	0	0	0	0	0	0	0	0	0	0	0	0	0	0	1	1	0	0	0
P2RX4	0	1	1	0	0	1	0	0	0	1	1	0	0	0	0	0	0	0	0	0	0	0	0
P4HB	1	0	0	0	0	0	1	0	0	0	0	0	0	0	0	0	0	1	0	0	0	0	0
PCCB	0	0	0	0	0	0	0	0	0	0	0	0	0	0	0	0	0	1	0	0	0	0	0
PDIA3	1	0	0	0	0	0	0	0	0	0	0	0	0	0	0	0	0	0	0	0	0	0	0
PDIA4	1	0	0	0	0	0	0	0	0	0	0	0	1	0	0	0	0	0	0	0	0	0	0
PDIA5	1	0	0	0	0	0	0	0	0	0	0	0	1	0	0	0	0	0	0	0	0	0	0
PDIA6	1	0	0	0	0	0	1	0	0	0	0	0	0	0	0	0	0	0	0	0	0	0	0
PEX11A	0	1	1	0	0	1	0	0	0	0	0	0	0	0	0	0	0	1	0	0	0	0	0
PGRMC2	0	1	1	0	0	1	0	0	0	0	0	0	0	0	0	0	0	0	0	0	0	0	0
PHYH	0	0	0	0	0	0	0	0	0	0	0	0	0	0	0	0	0	1	0	1	0	0	0
PI4K2A	0	1	1	0	0	1	0	0	0	1	1	0	0	0	0	0	0	1	1	1	1	0	0
PI4KA	0	0	0	0	0	0	0	0	0	0	0	1	0	0	0	0	0	1	1	1	1	0	0
PIGA	1	0	0	0	0	0	0	0	0	0	0	0	0	0	0	0	0	0	1	1	0	0	0
PIGG	1	0	0	0	0	0	0	0	0	0	0	0	0	0	0	0	0	0	1	1	0	0	0
PIGH	1	0	0	0	0	0	0	0	0	0	0	0	0	0	0	0	0	0	1	1	0	0	0
PIGU	1	1	1	0	0	1	0	1	1	0	0	0	1	0	0	0	0	0	1	1	0	0	0
PIK3R3	0	0	0	0	0	0	0	0	0	0	0	0	0	0	0	0	0	0	0	0	1	0	0
PIKFYVE	0	0	0	0	0	1	0	0	0	0	0	0	0	0	0	0	0	0	0	0	1	0	0
PKP2	0	1	1	0	0	1	0	0	0	0	0	0	0	0	0	0	0	0	0	0	0	0	0
PLA2G15	0	0	0	0	0	0	0	0	0	0	0	0	0	0	0	0	0	0	1	1	0	0	0
PLA2G16	0	0	0	0	0	0	0	0	0	0	0	0	0	0	0	0	0	1	0	0	1	0	0
PLCD1	0	0	0	0	0	0	0	0	0	0	0	0	0	0	0	0	0	0	1	1	0	0	0
PLD1	0	0	0	0	0	0	0	0	0	0	0	1	0	0	0	0	0	1	0	0	1	0	0
PLD3	0	0	0	0	0	0	0	0	0	0	0	0	0	0	0	0	0	0	0	0	1	0	0
PLIN2	1	0	0	0	0	0	0	0	0	0	0	0	0	1	0	0	0	1	0	0	0	0	0
PLOD3	1	0	0	0	0	0	0	0	0	0	0	0	0	0	0	0	0	0	0	0	0	0	0
PNPLA2	0	0	0	0	0	0	0	0	0	0	0	0	0	0	0	0	0	0	0	0	1	0	0
PNPLA8	0	0	0	0	0	0	0	0	0	0	0	0	0	0	0	0	0	1	1	1	1	0	0
PODXL	0	1	1	0	0	1	0	0	0	1	1	0	0	0	0	0	0	0	0	0	0	0	0
POR	1	0	0	0	0	0	0	0	0	0	0	0	0	0	0	0	0	0	0	0	0	0	0
PPAP2C	0	0	0	0	0	0	0	0	0	0	0	0	0	0	0	0	0	0	0	0	1	0	0
PPIB	1	0	0	0	0	0	0	0	0	0	0	0	0	0	0	0	0	0	0	0	0	0	0
PPM1L	0	0	0	0	0	0	0	0	0	0	0	0	0	0	0	0	0	0	0	0	1	0	0
PPOX	0	1	0	0	0	1	0	0	0	0	0	0	0	0	0	0	0	0	0	0	0	0	0
PPP1CC	0	0	0	0	0	0	0	0	0	0	0	0	0	0	0	0	0	1	0	0	0	0	0
PRAF2	0	1	1	0	0	1	0	0	0	0	0	0	0	0	0	0	0	0	0	0	0	0	0
PRKACA	0	0	0	0	0	0	0	0	0	0	0	0	0	0	0	0	0	1	0	0	0	0	0
PSAP	0	1	1	1	0	1	0	0	0	0	0	0	0	1	0	0	0	1	1	1	1	0	0
PSEN1	1	1	1	0	0	1	0	1	0	1	1	1	0	0	0	0	0	0	0	0	0	0	0
PTDSS1	0	0	0	0	0	0	0	0	0	0	0	0	0	0	0	0	0	1	0	0	1	0	0
PTPN1	0	0	0	0	0	0	0	0	0	0	0	0	0	0	0	0	0	0	0	0	0	1	0
PTPN6	0	0	0	0	0	0	0	0	0	0	0	0	0	0	0	0	0	0	0	0	0	1	0
PTPRJ	0	1	1	0	0	1	0	0	0	1	1	0	0	0	0	0	0	0	0	0	0	0	0
PTPRS	0	1	1	0	0	1	0	0	0	1	1	0	0	0	0	0	0	0	0	0	0	0	0
PTPRU	0	1	1	0	0	1	0	0	0	1	1	0	0	0	0	0	0	0	0	0	0	0	0
QSOX1	0	1	1	0	0	1	0	0	0	0	0	1	0	1	0	0	0	0	0	0	0	0	0
RAB11FIP5	0	0	0	0	0	1	0	0	0	0	0	0	0	0	0	0	0	0	0	0	0	0	0
RAB14	1	0	0	0	0	0	0	0	0	0	0	0	0	0	0	0	0	0	0	0	0	0	0
RAB2A	0	0	0	0	0	0	0	0	0	0	0	0	0	0	1	0	0	0	0	0	0	0	0
RAB35	0	0	0	0	0	1	0	0	0	0	0	0	0	1	0	0	0	0	0	0	0	0	0
RAB6A	0	0	0	0	0	0	0	0	0	0	0	1	0	0	0	0	0	0	0	0	0	0	0
RAE1	0	1	1	0	0	1	0	1	0	0	0	0	0	0	0	0	0	0	0	0	0	0	0
RAF1	0	0	0	0	0	1	0	0	0	0	0	0	0	0	0	0	0	0	0	0	0	0	0
RCE1	0	1	1	0	0	1	0	0	0	1	1	0	0	0	0	0	0	0	0	0	0	0	0
RCN2	1	0	0	0	0	0	0	0	0	0	0	0	0	0	0	0	0	0	0	0	0	0	0
RDH11	0	0	0	0	0	0	0	0	0	0	0	0	0	0	0	0	0	1	1	1	0	0	0
RINT1	1	0	0	0	0	0	0	0	0	0	0	0	0	0	0	0	0	0	0	0	0	0	0
RNASEL	0	0	0	0	0	0	0	0	0	0	0	0	0	0	0	0	0	0	0	0	0	1	0
RNF139	1	1	1	0	0	1	0	0	0	0	0	0	0	0	0	0	0	0	0	0	0	0	0
RPN1	1	0	0	0	0	1	0	1	1	0	0	0	1	0	0	0	0	0	0	0	0	0	0
RPN2	1	0	0	0	0	1	0	1	1	0	0	0	1	0	0	0	0	0	0	0	0	0	0
RTN1	1	1	1	0	0	1	0	1	1	0	0	0	1	0	0	0	0	0	0	0	0	0	0
RTN3	0	0	0	0	0	0	0	0	0	0	0	0	0	1	0	0	0	0	0	0	0	0	0
RTN4	1	1	1	0	0	1	0	1	1	0	0	0	1	0	0	0	0	0	0	0	0	0	0
SACM1L	0	0	0	0	0	0	0	0	0	0	0	1	0	0	0	0	0	1	0	0	1	0	0
SCAMP2	0	0	0	0	0	0	0	0	0	0	0	0	0	0	1	0	0	0	0	0	0	0	0
SCAMP3	0	0	0	0	0	0	0	0	0	0	0	0	0	0	1	0	0	0	0	0	0	0	0
SCARB1	0	0	0	0	0	0	0	0	0	0	0	0	0	0	0	0	0	1	1	1	0	0	0
SCARB2	0	1	1	1	0	1	0	0	0	1	1	0	0	0	0	0	0	0	0	0	0	0	0
SDCBP	0	1	1	0	0	1	0	0	0	1	1	0	0	0	0	0	0	0	0	0	0	0	0
SEC22A	1	0	0	0	0	1	0	1	1	0	0	0	1	0	1	0	0	0	0	0	0	0	0
SEC22B	0	0	0	0	1	0	0	0	0	0	0	0	0	0	1	0	0	0	0	0	0	0	0
SEC23A	1	0	0	0	0	0	0	0	0	0	0	0	0	0	0	0	0	0	0	0	0	0	0
SEC61B	1	0	0	0	0	0	0	0	0	0	0	0	0	0	0	1	0	0	0	0	0	0	0
SEC62	1	1	1	0	0	1	0	0	0	0	0	0	0	0	0	0	0	0	0	0	0	0	0
SERINC3	0	1	1	0	0	1	0	0	0	0	0	0	0	0	0	0	0	0	0	0	0	0	0
SERINC5	0	0	0	0	0	0	0	0	0	0	0	0	0	0	0	0	0	0	1	1	0	0	0
SERPINA1	0	0	0	0	0	0	0	0	0	0	0	0	0	1	0	0	0	0	0	0	0	0	0
SERPINH1	0	0	0	0	0	0	1	0	0	0	0	0	0	0	0	0	0	0	0	0	0	0	0
SGPP1	0	0	0	0	0	0	0	0	0	0	0	0	0	0	0	0	0	1	0	0	1	0	0
SIN3B	0	0	0	0	0	0	0	0	0	0	0	0	0	0	0	0	0	1	0	0	0	0	0
SLC12A9	0	1	1	0	0	1	0	0	0	0	0	0	0	0	0	0	0	0	0	0	0	0	0
SLC22A18	0	1	1	0	0	1	0	0	0	0	0	0	0	0	0	0	0	0	0	0	0	0	1
SLC25A11	0	1	1	0	0	1	0	0	0	1	1	0	0	0	0	0	0	0	0	0	0	0	0
SLC25A17	0	1	1	0	0	1	0	0	0	1	1	0	0	0	0	0	0	1	0	0	0	0	0
SLC25A20	0	0	0	0	0	0	0	0	0	0	0	0	0	0	0	0	0	1	0	0	0	0	0
SLC25A3	0	1	1	0	0	1	0	0	0	1	1	0	0	0	0	0	0	0	0	0	0	0	0
SLC25A4	0	1	1	0	0	1	0	0	0	1	1	0	0	0	0	0	0	0	0	0	0	0	0
SLC25A6	0	0	0	0	0	1	0	0	0	0	0	0	0	0	0	0	0	0	0	0	0	0	0
SLC27A2	1	0	0	0	0	0	0	0	0	0	0	0	0	0	0	0	0	1	1	1	0	0	0
SLC27A4	0	0	0	0	0	0	0	0	0	0	0	0	0	0	0	0	0	0	0	1	0	0	0
SLC2A1	0	0	0	0	0	0	0	0	0	0	0	0	0	0	0	0	0	0	0	0	0	0	1
SLC2A13	0	0	0	0	0	0	0	0	0	0	0	0	0	0	0	0	0	0	0	0	0	0	1
SLC30A1	0	0	0	0	0	0	0	0	0	0	0	0	0	0	0	0	0	0	0	0	0	0	1
SLC30A7	0	0	0	0	0	0	0	0	0	0	0	0	0	0	0	0	0	0	0	0	0	0	1
SLC31A1	0	1	1	0	0	1	0	0	0	1	1	0	0	0	0	0	0	0	0	0	0	0	1
SLC33A1	1	1	1	0	0	1	0	1	1	1	1	0	1	0	0	0	0	0	0	0	0	0	0
SLC35A1	0	1	1	0	0	1	0	0	0	1	1	0	0	0	0	0	0	0	0	0	0	0	0
SLC35B2	0	0	0	0	0	0	0	0	0	0	0	1	0	0	0	0	0	0	0	0	0	0	0
SLC39A7	0	0	0	0	0	0	0	0	0	0	0	0	0	0	0	0	0	0	0	0	0	0	1
SLC44A1	0	1	1	0	0	1	0	0	0	0	0	0	0	0	0	0	0	1	0	0	1	0	1
SLC6A14	0	0	0	0	0	0	0	0	0	0	0	0	0	0	0	0	0	0	0	0	0	0	1
SLC9A1	0	1	1	0	0	1	0	0	0	0	0	0	0	0	0	0	0	0	0	0	0	0	0
SLC9A7	0	1	1	0	0	1	0	0	0	0	0	1	0	0	0	0	0	0	0	0	0	0	0
SLMAP	1	1	1	0	0	1	0	0	0	1	1	0	0	0	0	0	0	0	0	0	0	0	0
SMPD4	1	0	0	0	0	0	0	0	0	0	0	0	0	0	0	0	0	0	1	1	1	0	0
SNAP47	0	0	0	0	1	0	0	0	0	0	0	0	0	0	0	0	0	0	0	0	0	0	0
SOAT1	1	0	0	0	0	0	0	0	0	0	0	0	0	0	0	0	0	0	1	1	0	0	0
SORT1	0	0	0	1	0	0	0	0	0	0	0	0	0	0	0	0	0	0	0	0	0	0	0
SPAG9	0	1	1	0	0	1	0	0	0	0	0	0	0	0	0	0	0	0	0	0	0	0	0
SPCS1	1	1	1	0	0	1	0	1	1	0	0	0	1	0	0	0	0	0	0	0	0	0	0
SPG21	0	0	0	0	0	0	0	0	0	0	0	1	0	0	0	0	0	0	0	0	0	0	0
SPINT1	0	0	0	0	0	0	0	0	0	0	0	0	0	1	0	0	0	0	0	0	0	0	0
SPINT2	0	1	1	0	0	1	0	0	0	0	0	0	0	1	0	0	0	0	0	0	0	0	0
SPTLC2	0	0	0	0	0	0	0	0	0	0	0	0	0	0	0	0	0	0	0	0	1	0	0
SQLE	0	0	0	0	0	0	0	0	0	0	0	0	0	0	0	0	1	1	0	0	0	0	0
SRP68	1	0	0	0	0	0	0	0	0	0	0	0	0	0	0	0	0	0	0	0	0	0	0
SRPR	1	1	1	0	0	1	0	1	1	0	0	0	1	0	0	0	0	0	0	0	0	0	0
ST14	0	1	1	0	0	1	0	0	0	1	1	0	0	0	0	0	0	0	0	0	0	0	0
STAT1	0	0	0	0	0	0	0	0	0	0	0	0	0	0	0	0	0	0	0	0	0	1	0
STBD1	0	1	1	0	0	1	0	0	0	1	1	0	0	0	0	0	0	0	0	0	0	0	0
STT3A	1	0	0	0	0	1	0	1	1	0	0	0	1	0	0	0	0	0	0	0	0	0	0
STT3B	1	0	0	0	0	1	0	1	1	0	0	0	1	0	0	0	0	0	0	0	0	0	0
STX12	0	0	0	0	1	1	0	0	0	0	0	0	0	0	0	0	0	0	0	0	0	0	0
STX18	1	0	0	0	1	0	0	0	0	0	0	0	0	0	1	0	0	0	0	0	0	0	0
STX3	0	0	0	0	1	1	0	0	0	0	0	0	0	0	0	0	0	0	0	0	0	0	0
STX4	0	0	0	0	1	1	0	0	0	0	0	0	0	0	0	0	0	0	0	0	0	0	0
STX5	0	0	0	0	1	1	0	0	0	0	0	1	0	0	0	0	0	0	0	0	0	0	0
STX6	0	0	0	0	1	0	0	0	0	0	0	0	0	0	0	0	0	0	0	0	0	0	0
STX7	0	0	0	0	1	0	0	0	0	0	0	0	0	0	1	0	0	0	0	0	0	0	0
STX8	1	1	1	0	1	1	0	0	0	1	1	0	0	0	0	0	0	0	0	0	0	0	0
SULT2B1	0	0	0	0	0	0	0	0	0	0	0	0	0	0	0	0	0	0	1	1	0	0	0
SURF1	0	0	0	0	0	1	0	0	0	0	0	0	0	0	0	0	0	0	0	0	0	0	0
SURF4	0	0	0	0	0	0	1	0	0	0	0	0	0	0	0	0	0	0	0	0	0	0	0
SYNGR2	0	1	1	0	0	1	0	0	0	1	1	0	0	0	0	0	0	0	0	0	0	0	0
SYNGR3	0	1	1	0	0	1	0	0	0	1	1	0	0	0	0	0	0	0	0	0	0	0	0
SYNJ1	0	0	0	0	0	0	0	0	0	0	0	0	0	0	0	0	0	1	0	0	1	0	0
SYPL1	0	1	1	0	0	1	0	0	0	1	1	0	0	0	0	0	0	0	0	0	0	0	0
SYTL1	0	0	0	0	0	1	0	0	0	0	0	0	0	0	0	0	0	0	0	0	0	0	0
SYTL4	0	0	0	0	0	1	0	0	0	0	0	0	0	0	0	0	0	0	0	0	0	0	0
SYVN1	1	0	0	0	0	0	0	0	0	0	0	0	0	0	0	0	0	0	0	0	0	0	0
TAP2	1	0	0	0	0	0	0	0	0	0	0	0	1	0	0	0	0	0	0	0	0	0	0
TAPBP	1	1	1	0	0	1	0	1	1	0	0	1	1	0	0	1	0	0	0	0	0	0	0
TIMM50	0	0	0	0	0	1	0	0	0	0	0	0	0	0	0	0	0	0	0	0	0	0	0
TM7SF2	1	1	1	0	0	1	0	0	0	1	1	0	0	0	0	0	1	1	0	0	0	0	0
TM9SF2	0	1	1	0	0	1	0	0	0	1	1	0	0	0	0	0	0	0	0	0	0	0	0
TMED10	0	1	1	0	0	1	1	0	0	0	0	1	0	0	1	0	0	0	0	0	0	0	0
TMED2	0	1	1	0	0	1	1	0	0	0	0	0	0	0	0	0	0	0	0	0	0	0	0
TMED5	0	0	0	0	0	0	1	0	0	0	0	0	0	0	0	0	0	0	0	0	0	0	0
TMED9	0	0	0	0	0	0	1	0	0	0	0	0	0	0	0	0	0	0	0	0	0	0	0
TMEM11	0	1	1	0	0	1	0	0	0	1	1	0	0	0	0	0	0	0	0	0	0	0	0
TMEM2	0	1	1	0	0	1	0	0	0	0	0	0	0	0	0	0	0	0	0	0	0	0	0
TMEM43	0	0	0	0	0	0	0	0	0	0	0	1	0	0	0	0	0	0	0	0	0	0	0
TPBG	0	1	1	0	0	1	0	0	0	1	1	0	0	0	0	0	0	0	0	0	0	0	0
TPP1	0	0	0	1	0	0	0	0	0	0	0	0	0	0	0	0	0	0	0	1	0	0	0
TPR	0	1	1	0	0	1	0	0	0	0	0	0	0	0	0	0	0	0	0	0	0	0	0
TRAM1	1	1	1	0	0	1	0	0	0	0	0	0	0	0	0	0	0	0	0	0	0	0	0
TRAPPC10	0	1	1	0	0	1	0	0	0	0	0	0	0	0	0	0	0	0	0	0	0	0	0
TRAPPC4	0	0	0	0	0	0	0	0	0	0	0	1	0	0	0	0	0	0	0	0	0	0	0
TRIM27	0	1	1	0	0	1	0	0	0	1	1	0	0	0	0	0	0	0	0	0	0	0	0
TSPAN13	0	1	1	0	0	1	0	0	0	1	1	0	0	0	0	0	0	0	0	0	0	0	0
TSPAN15	0	1	1	0	0	1	0	0	0	1	1	0	0	0	0	0	0	0	0	0	0	0	0
TYK2	0	0	0	0	0	0	0	0	0	0	0	0	0	0	0	0	0	0	0	0	0	1	0
UGCG	0	0	0	0	0	0	0	0	0	0	0	0	0	0	0	0	0	1	1	1	1	0	0
UGGT1	1	0	0	0	0	0	1	0	0	0	0	0	0	0	0	0	0	0	0	0	0	0	0
UNC13B	0	0	0	0	0	0	0	0	0	0	0	1	0	0	0	0	0	0	0	0	0	0	0
UQCRB	0	0	0	0	0	1	0	0	0	0	0	0	0	0	0	0	0	0	0	0	0	0	0
UQCRC1	0	0	0	0	0	1	0	0	0	0	0	0	0	0	0	0	0	0	0	0	0	0	0
UQCRH	0	0	0	0	0	1	0	0	0	0	0	0	0	0	0	0	0	0	0	0	0	0	0
USE1	1	0	0	0	1	0	0	0	0	0	0	0	0	0	1	0	0	0	0	0	0	0	0
USO1	0	0	0	0	0	1	0	0	0	0	0	1	0	0	0	0	0	0	0	0	0	0	0
VAMP3	0	1	1	0	1	1	0	0	0	0	0	0	0	0	0	0	0	0	0	0	0	0	0
VAMP7	0	0	0	0	1	0	0	0	0	0	0	0	0	0	0	0	0	0	0	0	0	0	0
VAMP8	0	0	0	0	1	0	0	0	0	0	0	0	0	0	0	0	0	0	0	0	0	0	0
VAPA	0	0	0	0	0	1	0	0	0	0	0	0	0	0	0	0	0	0	0	0	1	0	0
VAPB	1	0	0	0	0	1	0	1	1	0	0	1	1	0	0	0	0	1	0	0	1	0	0
VAT1	0	1	1	0	0	1	0	0	0	0	0	0	0	0	0	0	0	0	0	0	0	0	0
VCP	1	0	0	0	0	0	0	0	0	0	0	0	0	0	0	0	0	0	0	0	0	0	0
VDAC1	0	1	1	0	0	1	0	0	0	0	0	0	0	0	0	0	0	0	0	0	0	0	0
VDAC2	0	0	0	0	0	1	0	0	0	0	0	0	0	0	0	0	0	0	0	0	0	0	0
WFS1	0	1	1	0	0	1	0	0	0	0	0	0	0	0	0	0	0	0	0	0	0	0	0
XPO7	0	1	1	0	0	1	0	0	0	0	0	0	0	0	0	0	0	0	0	0	0	0	0
XPR1	0	1	1	0	0	1	0	0	0	1	1	0	0	0	0	0	0	0	0	0	0	0	0
YIF1A	0	0	0	0	0	0	1	0	0	0	0	0	0	0	0	0	0	0	0	0	0	0	0
ZFYVE1	1	0	0	0	0	0	0	0	0	0	0	1	0	0	0	0	0	0	0	0	0	0	0
